# Supplementary material for: Borneo coral reefs subject to high sediment loads show evidence of resilience to various environmental stressors
Source: PeerJ. 2019 Aug 14;7:e7382. doi: 10.7717/peerj.7382 (PMC6698134; doi:10.7717/peerj.7382)
Supplement: Supplemental Information 12 [file peerj-07-7382-s012.xlsx]

## Sheet: Light data
Date and time	Calibrated PAR (umol.m2.s-1)
2016-10-21 00:09:59	0
2016-10-21 00:19:59	0
2016-10-21 00:29:59	0
2016-10-21 00:39:59	0
2016-10-21 00:49:59	0
2016-10-21 00:59:59	0
2016-10-21 01:09:59	0
2016-10-21 01:19:59	0
2016-10-21 01:29:59	0
2016-10-21 01:39:59	0
2016-10-21 01:49:59	0
2016-10-21 01:59:59	0
2016-10-21 02:09:59	0
2016-10-21 02:19:59	0
2016-10-21 02:29:59	0
2016-10-21 02:39:59	0
2016-10-21 02:49:59	0
2016-10-21 02:59:59	0
2016-10-21 03:09:59	0
2016-10-21 03:19:59	0
2016-10-21 03:29:59	0
2016-10-21 03:39:59	0
2016-10-21 03:49:59	0
2016-10-21 03:59:59	0
2016-10-21 04:09:59	0
2016-10-21 04:19:59	0
2016-10-21 04:29:59	0
2016-10-21 04:39:59	0
2016-10-21 04:49:59	0
2016-10-21 04:59:59	0
2016-10-21 05:09:59	0
2016-10-21 05:19:59	0
2016-10-21 05:29:59	0
2016-10-21 05:39:59	0
2016-10-21 05:49:59	0
2016-10-21 05:59:59	0
2016-10-21 06:09:59	0
2016-10-21 06:19:59	1.4
2016-10-21 06:29:59	3
2016-10-21 06:39:59	6
2016-10-21 06:49:59	11
2016-10-21 06:59:59	16.6
2016-10-21 07:09:59	21
2016-10-21 07:19:59	28.4
2016-10-21 07:29:59	41.6
2016-10-21 07:39:59	55
2016-10-21 07:49:59	65.8
2016-10-21 07:59:59	78
2016-10-21 08:09:59	84.8
2016-10-21 08:19:59	94
2016-10-21 08:29:59	99.4
2016-10-21 08:39:59	104
2016-10-21 08:49:59	118.8
2016-10-21 08:59:59	193.6
2016-10-21 09:09:59	202
2016-10-21 09:19:59	195.4
2016-10-21 09:29:59	245.4
2016-10-21 09:39:59	218
2016-10-21 09:49:59	202.4
2016-10-21 09:59:59	211.8
2016-10-21 10:09:59	217.6
2016-10-21 10:19:59	195.6
2016-10-21 10:29:59	207.4
2016-10-21 10:39:59	201.8
2016-10-21 10:49:59	224.6
2016-10-21 10:59:59	226.2
2016-10-21 11:09:59	258.8
2016-10-21 11:19:59	253
2016-10-21 11:29:59	263.6
2016-10-21 11:39:59	252.4
2016-10-21 11:49:59	259.2
2016-10-21 11:59:59	267.4
2016-10-21 12:09:59	252.4
2016-10-21 12:19:59	253.6
2016-10-21 12:29:59	291.4
2016-10-21 12:39:59	284.8
2016-10-21 12:49:59	227.6
2016-10-21 12:59:59	279.6
2016-10-21 13:09:59	255.8
2016-10-21 13:19:59	216
2016-10-21 13:29:59	248.4
2016-10-21 13:39:59	190.4
2016-10-21 13:49:59	197.4
2016-10-21 13:59:59	246.6
2016-10-21 14:09:59	240.2
2016-10-21 14:19:59	263
2016-10-21 14:29:59	206.6
2016-10-21 14:39:59	209
2016-10-21 14:49:59	245
2016-10-21 14:59:59	187
2016-10-21 15:09:59	138.4
2016-10-21 15:19:59	159.6
2016-10-21 15:29:59	133.6
2016-10-21 15:39:59	111
2016-10-21 15:49:59	111.4
2016-10-21 15:59:59	107.6
2016-10-21 16:09:59	94.6
2016-10-21 16:19:59	124.6
2016-10-21 16:29:59	107
2016-10-21 16:39:59	89.2
2016-10-21 16:49:59	75.2
2016-10-21 16:59:59	65.4
2016-10-21 17:09:59	44.2
2016-10-21 17:19:59	28.2
2016-10-21 17:29:59	22.2
2016-10-21 17:39:59	15.4
2016-10-21 17:49:59	9.2
2016-10-21 17:59:59	4.4
2016-10-21 18:09:59	1
2016-10-21 18:19:59	0
2016-10-21 18:29:59	0
2016-10-21 18:39:59	0
2016-10-21 18:49:59	0
2016-10-21 18:59:59	0
2016-10-21 19:09:59	0
2016-10-21 19:19:59	0
2016-10-21 19:29:59	0
2016-10-21 19:39:59	0
2016-10-21 19:49:59	0
2016-10-21 19:59:59	0
2016-10-21 20:09:59	0
2016-10-21 20:19:59	0
2016-10-21 20:29:59	0
2016-10-21 20:39:59	0
2016-10-21 20:49:59	0
2016-10-21 20:59:59	0
2016-10-21 21:09:59	0
2016-10-21 21:19:59	0
2016-10-21 21:29:59	0
2016-10-21 21:39:59	0
2016-10-21 21:49:59	0
2016-10-21 21:59:59	0
2016-10-21 22:09:59	0
2016-10-21 22:19:59	0
2016-10-21 22:29:59	0
2016-10-21 22:39:59	0
2016-10-21 22:49:59	0
2016-10-21 22:59:59	0
2016-10-21 23:09:59	0
2016-10-21 23:19:59	0
2016-10-21 23:29:59	0
2016-10-21 23:39:59	0
2016-10-21 23:49:59	0
2016-10-21 23:59:59	0
2016-10-22 00:09:59	0
2016-10-22 00:19:59	0
2016-10-22 00:29:59	0
2016-10-22 00:39:59	0
2016-10-22 00:49:59	0
2016-10-22 00:59:59	0
2016-10-22 01:09:59	0
2016-10-22 01:19:59	0
2016-10-22 01:29:59	0
2016-10-22 01:39:59	0
2016-10-22 01:49:59	0
2016-10-22 01:59:59	0
2016-10-22 02:09:59	0
2016-10-22 02:19:59	0
2016-10-22 02:29:59	0
2016-10-22 02:39:59	0
2016-10-22 02:49:59	0
2016-10-22 02:59:59	0
2016-10-22 03:09:59	0
2016-10-22 03:19:59	0
2016-10-22 03:29:59	0
2016-10-22 03:39:59	0
2016-10-22 03:49:59	0
2016-10-22 03:59:59	0
2016-10-22 04:09:59	0
2016-10-22 04:19:59	0
2016-10-22 04:29:59	0
2016-10-22 04:39:59	0
2016-10-22 04:49:59	0
2016-10-22 04:59:59	0
2016-10-22 05:09:59	0
2016-10-22 05:19:59	0
2016-10-22 05:29:59	0
2016-10-22 05:39:59	0
2016-10-22 05:49:59	0
2016-10-22 05:59:59	0
2016-10-22 06:09:59	0.6
2016-10-22 06:19:59	3.4
2016-10-22 06:29:59	10.2
2016-10-22 06:39:59	18.4
2016-10-22 06:49:59	26
2016-10-22 06:59:59	37.4
2016-10-22 07:09:59	39
2016-10-22 07:19:59	44.2
2016-10-22 07:29:59	53.6
2016-10-22 07:39:59	65.2
2016-10-22 07:49:59	92.6
2016-10-22 07:59:59	81.6
2016-10-22 08:09:59	96.4
2016-10-22 08:19:59	150.2
2016-10-22 08:29:59	202.6
2016-10-22 08:39:59	75.2
2016-10-22 08:49:59	38.6
2016-10-22 08:59:59	43
2016-10-22 09:09:59	46
2016-10-22 09:19:59	48.4
2016-10-22 09:29:59	54
2016-10-22 09:39:59	54
2016-10-22 09:49:59	48.2
2016-10-22 09:59:59	38.6
2016-10-22 10:09:59	37.4
2016-10-22 10:19:59	40.8
2016-10-22 10:29:59	39
2016-10-22 10:39:59	282
2016-10-22 10:49:59	336.6
2016-10-22 10:59:59	322
2016-10-22 11:09:59	190.2
2016-10-22 11:19:59	185.6
2016-10-22 11:29:59	235.4
2016-10-22 11:39:59	252.6
2016-10-22 11:49:59	198.4
2016-10-22 11:59:59	172.2
2016-10-22 12:09:59	173.2
2016-10-22 12:19:59	149.4
2016-10-22 12:29:59	138.6
2016-10-22 12:39:59	132.4
2016-10-22 12:49:59	121.8
2016-10-22 12:59:59	111
2016-10-22 13:09:59	112.4
2016-10-22 13:19:59	119.2
2016-10-22 13:29:59	125.4
2016-10-22 13:39:59	169.8
2016-10-22 13:49:59	156.6
2016-10-22 13:59:59	168.6
2016-10-22 14:09:59	205.8
2016-10-22 14:19:59	228
2016-10-22 14:29:59	160
2016-10-22 14:39:59	109.6
2016-10-22 14:49:59	99.6
2016-10-22 14:59:59	87
2016-10-22 15:09:59	90
2016-10-22 15:19:59	83.6
2016-10-22 15:29:59	68.2
2016-10-22 15:39:59	65.8
2016-10-22 15:49:59	41.6
2016-10-22 15:59:59	33
2016-10-22 16:09:59	28
2016-10-22 16:19:59	38.2
2016-10-22 16:29:59	33.4
2016-10-22 16:39:59	60.4
2016-10-22 16:49:59	57.6
2016-10-22 16:59:59	47.4
2016-10-22 17:09:59	38
2016-10-22 17:19:59	30.6
2016-10-22 17:29:59	23.2
2016-10-22 17:39:59	16.6
2016-10-22 17:49:59	10.2
2016-10-22 17:59:59	4.6
2016-10-22 18:09:59	1.4
2016-10-22 18:19:59	0.2
2016-10-22 18:29:59	0
2016-10-22 18:39:59	0
2016-10-22 18:49:59	0
2016-10-22 18:59:59	0
2016-10-22 19:09:59	0
2016-10-22 19:19:59	0
2016-10-22 19:29:59	0
2016-10-22 19:39:59	0
2016-10-22 19:49:59	0
2016-10-22 19:59:59	0
2016-10-22 20:09:59	0
2016-10-22 20:19:59	0
2016-10-22 20:29:59	0
2016-10-22 20:39:59	0
2016-10-22 20:49:59	0
2016-10-22 20:59:59	0
2016-10-22 21:09:59	0
2016-10-22 21:19:59	0
2016-10-22 21:29:59	0
2016-10-22 21:39:59	0
2016-10-22 21:49:59	0
2016-10-22 21:59:59	0
2016-10-22 22:09:59	0
2016-10-22 22:19:59	0
2016-10-22 22:29:59	0
2016-10-22 22:39:59	0
2016-10-22 22:49:59	0
2016-10-22 22:59:59	0
2016-10-22 23:09:59	0
2016-10-22 23:19:59	0
2016-10-22 23:29:59	0
2016-10-22 23:39:59	0
2016-10-22 23:49:59	0
2016-10-22 23:59:59	0
2016-10-23 00:09:59	0
2016-10-23 00:19:59	0
2016-10-23 00:29:59	0
2016-10-23 00:39:59	0
2016-10-23 00:49:59	0
2016-10-23 00:59:59	0
2016-10-23 01:09:59	0
2016-10-23 01:19:59	0
2016-10-23 01:29:59	0
2016-10-23 01:39:59	0
2016-10-23 01:49:59	0
2016-10-23 01:59:59	0
2016-10-23 02:09:59	0
2016-10-23 02:19:59	0
2016-10-23 02:29:59	0
2016-10-23 02:39:59	0
2016-10-23 02:49:59	0
2016-10-23 02:59:59	0
2016-10-23 03:09:59	0
2016-10-23 03:19:59	0
2016-10-23 03:29:59	0
2016-10-23 03:39:59	0
2016-10-23 03:49:59	0
2016-10-23 03:59:59	0
2016-10-23 04:09:59	0
2016-10-23 04:19:59	0
2016-10-23 04:29:59	0
2016-10-23 04:39:59	0
2016-10-23 04:49:59	0
2016-10-23 04:59:59	0
2016-10-23 05:09:59	0
2016-10-23 05:19:59	0
2016-10-23 05:29:59	0
2016-10-23 05:39:59	0
2016-10-23 05:49:59	0
2016-10-23 05:59:59	0
2016-10-23 06:09:59	0.2
2016-10-23 06:19:59	2
2016-10-23 06:29:59	4.4
2016-10-23 06:39:59	7.2
2016-10-23 06:49:59	9.4
2016-10-23 06:59:59	13.2
2016-10-23 07:09:59	16.4
2016-10-23 07:19:59	12.8
2016-10-23 07:29:59	17.6
2016-10-23 07:39:59	33.4
2016-10-23 07:49:59	21.4
2016-10-23 07:59:59	20.4
2016-10-23 08:09:59	26.6
2016-10-23 08:19:59	17.4
2016-10-23 08:29:59	15.4
2016-10-23 08:39:59	20.4
2016-10-23 08:49:59	24.4
2016-10-23 08:59:59	31
2016-10-23 09:09:59	37.6
2016-10-23 09:19:59	35.4
2016-10-23 09:29:59	60.8
2016-10-23 09:39:59	120.8
2016-10-23 09:49:59	93.8
2016-10-23 09:59:59	122.2
2016-10-23 10:09:59	216.4
2016-10-23 10:19:59	131.6
2016-10-23 10:29:59	158.6
2016-10-23 10:39:59	119
2016-10-23 10:49:59	128
2016-10-23 10:59:59	107
2016-10-23 11:09:59	75.6
2016-10-23 11:19:59	63.2
2016-10-23 11:29:59	72.4
2016-10-23 11:39:59	79.8
2016-10-23 11:49:59	98.6
2016-10-23 11:59:59	113.8
2016-10-23 12:09:59	124.8
2016-10-23 12:19:59	159.8
2016-10-23 12:29:59	138
2016-10-23 12:39:59	214.2
2016-10-23 12:49:59	241.4
2016-10-23 12:59:59	225.2
2016-10-23 13:09:59	179.4
2016-10-23 13:19:59	151.8
2016-10-23 13:29:59	142.8
2016-10-23 13:39:59	105.6
2016-10-23 13:49:59	107.4
2016-10-23 13:59:59	115.8
2016-10-23 14:09:59	109.8
2016-10-23 14:19:59	91.4
2016-10-23 14:29:59	79.6
2016-10-23 14:39:59	78.6
2016-10-23 14:49:59	83.8
2016-10-23 14:59:59	78.4
2016-10-23 15:09:59	62.2
2016-10-23 15:19:59	61.4
2016-10-23 15:29:59	74.6
2016-10-23 15:39:59	79
2016-10-23 15:49:59	85.6
2016-10-23 15:59:59	86.8
2016-10-23 16:09:59	41.2
2016-10-23 16:19:59	29.6
2016-10-23 16:29:59	40.4
2016-10-23 16:39:59	13.8
2016-10-23 16:49:59	2.2
2016-10-23 16:59:59	2.4
2016-10-23 17:09:59	3.6
2016-10-23 17:19:59	5.2
2016-10-23 17:29:59	5.4
2016-10-23 17:39:59	5.4
2016-10-23 17:49:59	2.8
2016-10-23 17:59:59	1
2016-10-23 18:09:59	0
2016-10-23 18:19:59	0
2016-10-23 18:29:59	0
2016-10-23 18:39:59	0
2016-10-23 18:49:59	0
2016-10-23 18:59:59	0
2016-10-23 19:09:59	0
2016-10-23 19:19:59	0
2016-10-23 19:29:59	0
2016-10-23 19:39:59	0
2016-10-23 19:49:59	0
2016-10-23 19:59:59	0
2016-10-23 20:09:59	0
2016-10-23 20:19:59	0
2016-10-23 20:29:59	0
2016-10-23 20:39:59	0
2016-10-23 20:49:59	0
2016-10-23 20:59:59	0
2016-10-23 21:09:59	0
2016-10-23 21:19:59	0
2016-10-23 21:29:59	0
2016-10-23 21:39:59	0
2016-10-23 21:49:59	0
2016-10-23 21:59:59	0
2016-10-23 22:09:59	0
2016-10-23 22:19:59	0
2016-10-23 22:29:59	0
2016-10-23 22:39:59	0
2016-10-23 22:49:59	0
2016-10-23 22:59:59	0
2016-10-23 23:09:59	0
2016-10-23 23:19:59	0
2016-10-23 23:29:59	0
2016-10-23 23:39:59	0
2016-10-23 23:49:59	0
2016-10-23 23:59:59	0
2016-10-24 00:09:59	0
2016-10-24 00:19:59	0
2016-10-24 00:29:59	0
2016-10-24 00:39:59	0
2016-10-24 00:49:59	0
2016-10-24 00:59:59	0
2016-10-24 01:09:59	0
2016-10-24 01:19:59	0
2016-10-24 01:29:59	0
2016-10-24 01:39:59	0
2016-10-24 01:49:59	0
2016-10-24 01:59:59	0
2016-10-24 02:09:59	0
2016-10-24 02:19:59	0
2016-10-24 02:29:59	0
2016-10-24 02:39:59	0
2016-10-24 02:49:59	0
2016-10-24 02:59:59	0
2016-10-24 03:09:59	0
2016-10-24 03:19:59	0
2016-10-24 03:29:59	0
2016-10-24 03:39:59	0
2016-10-24 03:49:59	0
2016-10-24 03:59:59	0
2016-10-24 04:09:59	0
2016-10-24 04:19:59	0
2016-10-24 04:29:59	0
2016-10-24 04:39:59	0
2016-10-24 04:49:59	0
2016-10-24 04:59:59	0
2016-10-24 05:09:59	0
2016-10-24 05:19:59	0
2016-10-24 05:29:59	0
2016-10-24 05:39:59	0
2016-10-24 05:49:59	0
2016-10-24 05:59:59	0
2016-10-24 06:09:59	0
2016-10-24 06:19:59	0.2
2016-10-24 06:29:59	0.2
2016-10-24 06:39:59	0
2016-10-24 06:49:59	0
2016-10-24 06:59:59	0.2
2016-10-24 07:09:59	0.4
2016-10-24 07:19:59	0.6
2016-10-24 07:29:59	0.6
2016-10-24 07:39:59	1.2
2016-10-24 07:49:59	2.2
2016-10-24 07:59:59	1
2016-10-24 08:09:59	0.8
2016-10-24 08:19:59	0.4
2016-10-24 08:29:59	0.6
2016-10-24 08:39:59	8.2
2016-10-24 08:49:59	12.4
2016-10-24 08:59:59	21.6
2016-10-24 09:09:59	23.8
2016-10-24 09:19:59	27
2016-10-24 09:29:59	37.6
2016-10-24 09:39:59	44.6
2016-10-24 09:49:59	43.8
2016-10-24 09:59:59	52.2
2016-10-24 10:09:59	60.8
2016-10-24 10:19:59	79.4
2016-10-24 10:29:59	93.8
2016-10-24 10:39:59	118.4
2016-10-24 10:49:59	135.4
2016-10-24 10:59:59	173.4
2016-10-24 11:09:59	177
2016-10-24 11:19:59	203.8
2016-10-24 11:29:59	238.4
2016-10-24 11:39:59	226.4
2016-10-24 11:49:59	200.8
2016-10-24 11:59:59	190.8
2016-10-24 12:09:59	201.2
2016-10-24 12:19:59	134
2016-10-24 12:29:59	85.2
2016-10-24 12:39:59	53.8
2016-10-24 12:49:59	73
2016-10-24 12:59:59	114.4
2016-10-24 13:09:59	89.6
2016-10-24 13:19:59	95.2
2016-10-24 13:29:59	92.8
2016-10-24 13:39:59	56.8
2016-10-24 13:49:59	41.8
2016-10-24 13:59:59	50.8
2016-10-24 14:09:59	36
2016-10-24 14:19:59	31.4
2016-10-24 14:29:59	23.2
2016-10-24 14:39:59	21.8
2016-10-24 14:49:59	19.6
2016-10-24 14:59:59	20
2016-10-24 15:09:59	17
2016-10-24 15:19:59	14.8
2016-10-24 15:29:59	12.8
2016-10-24 15:39:59	12
2016-10-24 15:49:59	16.6
2016-10-24 15:59:59	13.2
2016-10-24 16:09:59	12.6
2016-10-24 16:19:59	11.2
2016-10-24 16:29:59	7.8
2016-10-24 16:39:59	7.8
2016-10-24 16:49:59	8.8
2016-10-24 16:59:59	9.2
2016-10-24 17:09:59	6.2
2016-10-24 17:19:59	4
2016-10-24 17:29:59	2.2
2016-10-24 17:39:59	1
2016-10-24 17:49:59	0.8
2016-10-24 17:59:59	0.4
2016-10-24 18:09:59	0
2016-10-24 18:19:59	0
2016-10-24 18:29:59	0
2016-10-24 18:39:59	0
2016-10-24 18:49:59	0
2016-10-24 18:59:59	0
2016-10-24 19:09:59	0
2016-10-24 19:19:59	0
2016-10-24 19:29:59	0
2016-10-24 19:39:59	0
2016-10-24 19:49:59	0
2016-10-24 19:59:59	0
2016-10-24 20:09:59	0
2016-10-24 20:19:59	0
2016-10-24 20:29:59	0
2016-10-24 20:39:59	0
2016-10-24 20:49:59	0
2016-10-24 20:59:59	0
2016-10-24 21:09:59	0
2016-10-24 21:19:59	0
2016-10-24 21:29:59	0
2016-10-24 21:39:59	0
2016-10-24 21:49:59	0
2016-10-24 21:59:59	0
2016-10-24 22:09:59	0
2016-10-24 22:19:59	0
2016-10-24 22:29:59	0
2016-10-24 22:39:59	0
2016-10-24 22:49:59	0
2016-10-24 22:59:59	0
2016-10-24 23:09:59	0
2016-10-24 23:19:59	0
2016-10-24 23:29:59	0
2016-10-24 23:39:59	0
2016-10-24 23:49:59	0
2016-10-24 23:59:59	0
2016-10-25 00:09:59	0
2016-10-25 00:19:59	0
2016-10-25 00:29:59	0
2016-10-25 00:39:59	0
2016-10-25 00:49:59	0
2016-10-25 00:59:59	0
2016-10-25 01:09:59	0
2016-10-25 01:19:59	0
2016-10-25 01:29:59	0
2016-10-25 01:39:59	0
2016-10-25 01:49:59	0
2016-10-25 01:59:59	0
2016-10-25 02:09:59	0
2016-10-25 02:19:59	0
2016-10-25 02:29:59	0
2016-10-25 02:39:59	0
2016-10-25 02:49:59	0
2016-10-25 02:59:59	0
2016-10-25 03:09:59	0
2016-10-25 03:19:59	0
2016-10-25 03:29:59	0
2016-10-25 03:39:59	0
2016-10-25 03:49:59	0
2016-10-25 03:59:59	0
2016-10-25 04:09:59	0
2016-10-25 04:19:59	0
2016-10-25 04:29:59	0
2016-10-25 04:39:59	0
2016-10-25 04:49:59	0
2016-10-25 04:59:59	0
2016-10-25 05:09:59	0
2016-10-25 05:19:59	0
2016-10-25 05:29:59	0
2016-10-25 05:39:59	0
2016-10-25 05:49:59	0
2016-10-25 05:59:59	0
2016-10-25 06:09:59	0
2016-10-25 06:19:59	0
2016-10-25 06:29:59	0
2016-10-25 06:39:59	0
2016-10-25 06:49:59	0.4
2016-10-25 06:59:59	0.2
2016-10-25 07:09:59	0.2
2016-10-25 07:19:59	0.2
2016-10-25 07:29:59	0.4
2016-10-25 07:39:59	1
2016-10-25 07:49:59	1
2016-10-25 07:59:59	3
2016-10-25 08:09:59	6.8
2016-10-25 08:19:59	7.2
2016-10-25 08:29:59	8.4
2016-10-25 08:39:59	14
2016-10-25 08:49:59	12
2016-10-25 08:59:59	14.6
2016-10-25 09:09:59	14
2016-10-25 09:19:59	18
2016-10-25 09:29:59	27.2
2016-10-25 09:39:59	20.6
2016-10-25 09:49:59	25.6
2016-10-25 09:59:59	47.4
2016-10-25 10:09:59	77.6
2016-10-25 10:19:59	106
2016-10-25 10:29:59	124.2
2016-10-25 10:39:59	50.4
2016-10-25 10:49:59	40.6
2016-10-25 10:59:59	36
2016-10-25 11:09:59	32.8
2016-10-25 11:19:59	35.8
2016-10-25 11:29:59	40.2
2016-10-25 11:39:59	24.6
2016-10-25 11:49:59	31.4
2016-10-25 11:59:59	28.2
2016-10-25 12:09:59	43.8
2016-10-25 12:19:59	28.2
2016-10-25 12:29:59	30.8
2016-10-25 12:39:59	52.2
2016-10-25 12:49:59	48
2016-10-25 12:59:59	85.4
2016-10-25 13:09:59	135.8
2016-10-25 13:19:59	177.4
2016-10-25 13:29:59	138.8
2016-10-25 13:39:59	112.8
2016-10-25 13:49:59	120.8
2016-10-25 13:59:59	134.8
2016-10-25 14:09:59	132.6
2016-10-25 14:19:59	120.8
2016-10-25 14:29:59	96.2
2016-10-25 14:39:59	83.2
2016-10-25 14:49:59	62.6
2016-10-25 14:59:59	46.2
2016-10-25 15:09:59	28.2
2016-10-25 15:19:59	15.8
2016-10-25 15:29:59	7.4
2016-10-25 15:39:59	5
2016-10-25 15:49:59	8.4
2016-10-25 15:59:59	11.2
2016-10-25 16:09:59	8
2016-10-25 16:19:59	6.4
2016-10-25 16:29:59	2.8
2016-10-25 16:39:59	1.4
2016-10-25 16:49:59	1.8
2016-10-25 16:59:59	0.8
2016-10-25 17:09:59	0
2016-10-25 17:19:59	0.4
2016-10-25 17:29:59	0
2016-10-25 17:39:59	0.2
2016-10-25 17:49:59	0.2
2016-10-25 17:59:59	0
2016-10-25 18:09:59	0
2016-10-25 18:19:59	0
2016-10-25 18:29:59	0
2016-10-25 18:39:59	0
2016-10-25 18:49:59	0
2016-10-25 18:59:59	0
2016-10-25 19:09:59	0
2016-10-25 19:19:59	0
2016-10-25 19:29:59	0
2016-10-25 19:39:59	0
2016-10-25 19:49:59	0
2016-10-25 19:59:59	0
2016-10-25 20:09:59	0
2016-10-25 20:19:59	0
2016-10-25 20:29:59	0
2016-10-25 20:39:59	0
2016-10-25 20:49:59	0
2016-10-25 20:59:59	0
2016-10-25 21:09:59	0
2016-10-25 21:19:59	0
2016-10-25 21:29:59	0
2016-10-25 21:39:59	0
2016-10-25 21:49:59	0
2016-10-25 21:59:59	0
2016-10-25 22:09:59	0
2016-10-25 22:19:59	0
2016-10-25 22:29:59	0
2016-10-25 22:39:59	0
2016-10-25 22:49:59	0
2016-10-25 22:59:59	0
2016-10-25 23:09:59	0
2016-10-25 23:19:59	0
2016-10-25 23:29:59	0
2016-10-25 23:39:59	0
2016-10-25 23:49:59	0
2016-10-25 23:59:59	0
2016-10-26 00:09:59	0
2016-10-26 00:19:59	0
2016-10-26 00:29:59	0
2016-10-26 00:39:59	0
2016-10-26 00:49:59	0
2016-10-26 00:59:59	0
2016-10-26 01:09:59	0
2016-10-26 01:19:59	0
2016-10-26 01:29:59	0
2016-10-26 01:39:59	0
2016-10-26 01:49:59	0
2016-10-26 01:59:59	0
2016-10-26 02:09:59	0
2016-10-26 02:19:59	0
2016-10-26 02:29:59	0
2016-10-26 02:39:59	0
2016-10-26 02:49:59	0
2016-10-26 02:59:59	0
2016-10-26 03:09:59	0
2016-10-26 03:19:59	0
2016-10-26 03:29:59	0
2016-10-26 03:39:59	0
2016-10-26 03:49:59	0
2016-10-26 03:59:59	0
2016-10-26 04:09:59	0
2016-10-26 04:19:59	0
2016-10-26 04:29:59	0
2016-10-26 04:39:59	0
2016-10-26 04:49:59	0
2016-10-26 04:59:59	0
2016-10-26 05:09:59	0
2016-10-26 05:19:59	0
2016-10-26 05:29:59	0
2016-10-26 05:39:59	0
2016-10-26 05:49:59	0
2016-10-26 05:59:59	0
2016-10-26 06:09:59	0
2016-10-26 06:19:59	0.6
2016-10-26 06:29:59	2.2
2016-10-26 06:39:59	4
2016-10-26 06:49:59	5
2016-10-26 06:59:59	7.2
2016-10-26 07:09:59	9.6
2016-10-26 07:19:59	10
2016-10-26 07:29:59	12
2016-10-26 07:39:59	13.2
2016-10-26 07:49:59	14.8
2016-10-26 07:59:59	18.6
2016-10-26 08:09:59	26.4
2016-10-26 08:19:59	34.6
2016-10-26 08:29:59	40.2
2016-10-26 08:39:59	36.2
2016-10-26 08:49:59	37.6
2016-10-26 08:59:59	47.2
2016-10-26 09:09:59	45.4
2016-10-26 09:19:59	47.8
2016-10-26 09:29:59	49
2016-10-26 09:39:59	48.2
2016-10-26 09:49:59	48.2
2016-10-26 09:59:59	47.6
2016-10-26 10:09:59	47.8
2016-10-26 10:19:59	46.4
2016-10-26 10:29:59	44.8
2016-10-26 10:39:59	43.4
2016-10-26 10:49:59	51.8
2016-10-26 10:59:59	58.4
2016-10-26 11:09:59	58.6
2016-10-26 11:19:59	57
2016-10-26 11:29:59	57.4
2016-10-26 11:39:59	61
2016-10-26 11:49:59	70.2
2016-10-26 11:59:59	70.8
2016-10-26 12:09:59	67.2
2016-10-26 12:19:59	70
2016-10-26 12:29:59	67.8
2016-10-26 12:39:59	67.2
2016-10-26 12:49:59	64.4
2016-10-26 12:59:59	60.4
2016-10-26 13:09:59	49
2016-10-26 13:19:59	52.4
2016-10-26 13:29:59	50.4
2016-10-26 13:39:59	52.2
2016-10-26 13:49:59	49.4
2016-10-26 13:59:59	49.2
2016-10-26 14:09:59	43.4
2016-10-26 14:19:59	42.8
2016-10-26 14:29:59	36.6
2016-10-26 14:39:59	30.4
2016-10-26 14:49:59	22.2
2016-10-26 14:59:59	18.4
2016-10-26 15:09:59	21
2016-10-26 15:19:59	14.8
2016-10-26 15:29:59	12.8
2016-10-26 15:39:59	12
2016-10-26 15:49:59	9.4
2016-10-26 15:59:59	9.4
2016-10-26 16:09:59	14
2016-10-26 16:19:59	15.2
2016-10-26 16:29:59	10.2
2016-10-26 16:39:59	9.4
2016-10-26 16:49:59	11.8
2016-10-26 16:59:59	8.8
2016-10-26 17:09:59	6.4
2016-10-26 17:19:59	4.2
2016-10-26 17:29:59	2.6
2016-10-26 17:39:59	1.6
2016-10-26 17:49:59	1
2016-10-26 17:59:59	0.4
2016-10-26 18:09:59	0.2
2016-10-26 18:19:59	0
2016-10-26 18:29:59	0
2016-10-26 18:39:59	0
2016-10-26 18:49:59	0
2016-10-26 18:59:59	0
2016-10-26 19:09:59	0
2016-10-26 19:19:59	0
2016-10-26 19:29:59	0
2016-10-26 19:39:59	0
2016-10-26 19:49:59	0
2016-10-26 19:59:59	0
2016-10-26 20:09:59	0
2016-10-26 20:19:59	0
2016-10-26 20:29:59	0
2016-10-26 20:39:59	0
2016-10-26 20:49:59	0
2016-10-26 20:59:59	0
2016-10-26 21:09:59	0
2016-10-26 21:19:59	0
2016-10-26 21:29:59	0
2016-10-26 21:39:59	0
2016-10-26 21:49:59	0
2016-10-26 21:59:59	0
2016-10-26 22:09:59	0
2016-10-26 22:19:59	0
2016-10-26 22:29:59	0
2016-10-26 22:39:59	0
2016-10-26 22:49:59	0
2016-10-26 22:59:59	0
2016-10-26 23:09:59	0
2016-10-26 23:19:59	0
2016-10-26 23:29:59	0
2016-10-26 23:39:59	0
2016-10-26 23:49:59	0
2016-10-26 23:59:59	0
2016-10-27 00:09:59	0
2016-10-27 00:19:59	0
2016-10-27 00:29:59	0
2016-10-27 00:39:59	0
2016-10-27 00:49:59	0
2016-10-27 00:59:59	0
2016-10-27 01:09:59	0
2016-10-27 01:19:59	0
2016-10-27 01:29:59	0
2016-10-27 01:39:59	0
2016-10-27 01:49:59	0
2016-10-27 01:59:59	0
2016-10-27 02:09:59	0
2016-10-27 02:19:59	0
2016-10-27 02:29:59	0
2016-10-27 02:39:59	0
2016-10-27 02:49:59	0
2016-10-27 02:59:59	0
2016-10-27 03:09:59	0
2016-10-27 03:19:59	0
2016-10-27 03:29:59	0
2016-10-27 03:39:59	0
2016-10-27 03:49:59	0
2016-10-27 03:59:59	0
2016-10-27 04:09:59	0
2016-10-27 04:19:59	0
2016-10-27 04:29:59	0
2016-10-27 04:39:59	0
2016-10-27 04:49:59	0
2016-10-27 04:59:59	0
2016-10-27 05:09:59	0
2016-10-27 05:19:59	0
2016-10-27 05:29:59	0
2016-10-27 05:39:59	0
2016-10-27 05:49:59	0
2016-10-27 05:59:59	0
2016-10-27 06:09:59	0
2016-10-27 06:19:59	0.2
2016-10-27 06:29:59	1.2
2016-10-27 06:39:59	2.4
2016-10-27 06:49:59	3
2016-10-27 06:59:59	5.4
2016-10-27 07:09:59	7
2016-10-27 07:19:59	8.8
2016-10-27 07:29:59	11.8
2016-10-27 07:39:59	14.8
2016-10-27 07:49:59	15.2
2016-10-27 07:59:59	18.4
2016-10-27 08:09:59	20.4
2016-10-27 08:19:59	22.6
2016-10-27 08:29:59	30.6
2016-10-27 08:39:59	28.2
2016-10-27 08:49:59	34
2016-10-27 08:59:59	38.4
2016-10-27 09:09:59	72.2
2016-10-27 09:19:59	72
2016-10-27 09:29:59	64
2016-10-27 09:39:59	90.2
2016-10-27 09:49:59	92
2016-10-27 09:59:59	94.8
2016-10-27 10:09:59	90
2016-10-27 10:19:59	109
2016-10-27 10:29:59	118.4
2016-10-27 10:39:59	119.2
2016-10-27 10:49:59	122.2
2016-10-27 10:59:59	122.8
2016-10-27 11:09:59	126.8
2016-10-27 11:19:59	129.4
2016-10-27 11:29:59	132.8
2016-10-27 11:39:59	135.2
2016-10-27 11:49:59	125.8
2016-10-27 11:59:59	101.4
2016-10-27 12:09:59	139.2
2016-10-27 12:19:59	126.6
2016-10-27 12:29:59	138.2
2016-10-27 12:39:59	149.6
2016-10-27 12:49:59	148
2016-10-27 12:59:59	150.2
2016-10-27 13:09:59	154.4
2016-10-27 13:19:59	174.8
2016-10-27 13:29:59	134.2
2016-10-27 13:39:59	161.8
2016-10-27 13:49:59	142.6
2016-10-27 13:59:59	139.4
2016-10-27 14:09:59	136
2016-10-27 14:19:59	128.8
2016-10-27 14:29:59	127.4
2016-10-27 14:39:59	120.4
2016-10-27 14:49:59	117.2
2016-10-27 14:59:59	122.6
2016-10-27 15:09:59	65.6
2016-10-27 15:19:59	26.6
2016-10-27 15:29:59	23.2
2016-10-27 15:39:59	25.2
2016-10-27 15:49:59	21
2016-10-27 15:59:59	19.2
2016-10-27 16:09:59	19.8
2016-10-27 16:19:59	21
2016-10-27 16:29:59	12.4
2016-10-27 16:39:59	1.8
2016-10-27 16:49:59	1.8
2016-10-27 16:59:59	2
2016-10-27 17:09:59	1.8
2016-10-27 17:19:59	1.2
2016-10-27 17:29:59	1.2
2016-10-27 17:39:59	1
2016-10-27 17:49:59	0.4
2016-10-27 17:59:59	0
2016-10-27 18:09:59	0
2016-10-27 18:19:59	0
2016-10-27 18:29:59	0
2016-10-27 18:39:59	0
2016-10-27 18:49:59	0
2016-10-27 18:59:59	0
2016-10-27 19:09:59	0
2016-10-27 19:19:59	0
2016-10-27 19:29:59	0
2016-10-27 19:39:59	0
2016-10-27 19:49:59	0
2016-10-27 19:59:59	0
2016-10-27 20:09:59	0
2016-10-27 20:19:59	0
2016-10-27 20:29:59	0
2016-10-27 20:39:59	0
2016-10-27 20:49:59	0
2016-10-27 20:59:59	0
2016-10-27 21:09:59	0
2016-10-27 21:19:59	0
2016-10-27 21:29:59	0
2016-10-27 21:39:59	0
2016-10-27 21:49:59	0
2016-10-27 21:59:59	0
2016-10-27 22:09:59	0
2016-10-27 22:19:59	0
2016-10-27 22:29:59	0
2016-10-27 22:39:59	0
2016-10-27 22:49:59	0
2016-10-27 22:59:59	0
2016-10-27 23:09:59	0
2016-10-27 23:19:59	0
2016-10-27 23:29:59	0
2016-10-27 23:39:59	0
2016-10-27 23:49:59	0
2016-10-27 23:59:59	0
2016-10-28 00:09:59	0
2016-10-28 00:19:59	0
2016-10-28 00:29:59	0
2016-10-28 00:39:59	0
2016-10-28 00:49:59	0
2016-10-28 00:59:59	0
2016-10-28 01:09:59	0
2016-10-28 01:19:59	0
2016-10-28 01:29:59	0
2016-10-28 01:39:59	0
2016-10-28 01:49:59	0
2016-10-28 01:59:59	0
2016-10-28 02:09:59	0
2016-10-28 02:19:59	0
2016-10-28 02:29:59	0
2016-10-28 02:39:59	0
2016-10-28 02:49:59	0
2016-10-28 02:59:59	0
2016-10-28 03:09:59	0
2016-10-28 03:19:59	0
2016-10-28 03:29:59	0
2016-10-28 03:39:59	0
2016-10-28 03:49:59	0
2016-10-28 03:59:59	0
2016-10-28 04:09:59	0
2016-10-28 04:19:59	0
2016-10-28 04:29:59	0
2016-10-28 04:39:59	0
2016-10-28 04:49:59	0
2016-10-28 04:59:59	0
2016-10-28 05:09:59	0
2016-10-28 05:19:59	0
2016-10-28 05:29:59	0
2016-10-28 05:39:59	0
2016-10-28 05:49:59	0
2016-10-28 05:59:59	0
2016-10-28 06:09:59	0
2016-10-28 06:19:59	1.4
2016-10-28 06:29:59	4.4
2016-10-28 06:39:59	9.2
2016-10-28 06:49:59	14.8
2016-10-28 06:59:59	19.2
2016-10-28 07:09:59	22.6
2016-10-28 07:19:59	25.4
2016-10-28 07:29:59	29
2016-10-28 07:39:59	35.4
2016-10-28 07:49:59	43.8
2016-10-28 07:59:59	52.2
2016-10-28 08:09:59	61.2
2016-10-28 08:19:59	62.8
2016-10-28 08:29:59	56
2016-10-28 08:39:59	48.8
2016-10-28 08:49:59	52.6
2016-10-28 08:59:59	81.2
2016-10-28 09:09:59	98.6
2016-10-28 09:19:59	78.4
2016-10-28 09:29:59	68.4
2016-10-28 09:39:59	80.6
2016-10-28 09:49:59	107.2
2016-10-28 09:59:59	102.2
2016-10-28 10:09:59	86.6
2016-10-28 10:19:59	81.8
2016-10-28 10:29:59	105.4
2016-10-28 10:39:59	131.4
2016-10-28 10:49:59	118
2016-10-28 10:59:59	111.4
2016-10-28 11:09:59	108.8
2016-10-28 11:19:59	104.8
2016-10-28 11:29:59	101
2016-10-28 11:39:59	98.2
2016-10-28 11:49:59	95.6
2016-10-28 11:59:59	94.6
2016-10-28 12:09:59	103.4
2016-10-28 12:19:59	106.2
2016-10-28 12:29:59	110
2016-10-28 12:39:59	130.4
2016-10-28 12:49:59	157.8
2016-10-28 12:59:59	163
2016-10-28 13:09:59	155.8
2016-10-28 13:19:59	267.2
2016-10-28 13:29:59	272.6
2016-10-28 13:39:59	276.2
2016-10-28 13:49:59	235
2016-10-28 13:59:59	286
2016-10-28 14:09:59	308.4
2016-10-28 14:19:59	293.2
2016-10-28 14:29:59	251.2
2016-10-28 14:39:59	184.6
2016-10-28 14:49:59	165
2016-10-28 14:59:59	178.2
2016-10-28 15:09:59	209.8
2016-10-28 15:19:59	217
2016-10-28 15:29:59	182
2016-10-28 15:39:59	134.6
2016-10-28 15:49:59	140
2016-10-28 15:59:59	127.8
2016-10-28 16:09:59	91.2
2016-10-28 16:19:59	82.2
2016-10-28 16:29:59	65.2
2016-10-28 16:39:59	47.2
2016-10-28 16:49:59	36.8
2016-10-28 16:59:59	28.6
2016-10-28 17:09:59	26.6
2016-10-28 17:19:59	20.6
2016-10-28 17:29:59	10.2
2016-10-28 17:39:59	6.6
2016-10-28 17:49:59	4.4
2016-10-28 17:59:59	3
2016-10-28 18:09:59	1.8
2016-10-28 18:19:59	0
2016-10-28 18:29:59	0
2016-10-28 18:39:59	0
2016-10-28 18:49:59	0
2016-10-28 18:59:59	0
2016-10-28 19:09:59	0
2016-10-28 19:19:59	0
2016-10-28 19:29:59	0
2016-10-28 19:39:59	0
2016-10-28 19:49:59	0
2016-10-28 19:59:59	0
2016-10-28 20:09:59	0
2016-10-28 20:19:59	0
2016-10-28 20:29:59	0
2016-10-28 20:39:59	0
2016-10-28 20:49:59	0
2016-10-28 20:59:59	0
2016-10-28 21:09:59	0
2016-10-28 21:19:59	0
2016-10-28 21:29:59	0
2016-10-28 21:39:59	0
2016-10-28 21:49:59	0
2016-10-28 21:59:59	0
2016-10-28 22:09:59	0
2016-10-28 22:19:59	0
2016-10-28 22:29:59	0
2016-10-28 22:39:59	0
2016-10-28 22:49:59	0
2016-10-28 22:59:59	0
2016-10-28 23:09:59	0
2016-10-28 23:19:59	0
2016-10-28 23:29:59	0
2016-10-28 23:39:59	0
2016-10-28 23:49:59	0
2016-10-28 23:59:59	0
2016-10-29 00:09:59	0
2016-10-29 00:19:59	0
2016-10-29 00:29:59	0
2016-10-29 00:39:59	0
2016-10-29 00:49:59	0
2016-10-29 00:59:59	0
2016-10-29 01:09:59	0
2016-10-29 01:19:59	0
2016-10-29 01:29:59	0
2016-10-29 01:39:59	0
2016-10-29 01:49:59	0
2016-10-29 01:59:59	0
2016-10-29 02:09:59	0
2016-10-29 02:19:59	0
2016-10-29 02:29:59	0
2016-10-29 02:39:59	0
2016-10-29 02:49:59	0
2016-10-29 02:59:59	0
2016-10-29 03:09:59	0
2016-10-29 03:19:59	0
2016-10-29 03:29:59	0
2016-10-29 03:39:59	0
2016-10-29 03:49:59	0
2016-10-29 03:59:59	0
2016-10-29 04:09:59	0
2016-10-29 04:19:59	0
2016-10-29 04:29:59	0
2016-10-29 04:39:59	0
2016-10-29 04:49:59	0
2016-10-29 04:59:59	0
2016-10-29 05:09:59	0
2016-10-29 05:19:59	0
2016-10-29 05:29:59	0
2016-10-29 05:39:59	0
2016-10-29 05:49:59	0
2016-10-29 05:59:59	0
2016-10-29 06:09:59	0
2016-10-29 06:19:59	0.2
2016-10-29 06:29:59	4.2
2016-10-29 06:39:59	11
2016-10-29 06:49:59	17
2016-10-29 06:59:59	20.2
2016-10-29 07:09:59	28
2016-10-29 07:19:59	36.8
2016-10-29 07:29:59	47.2
2016-10-29 07:39:59	51.2
2016-10-29 07:49:59	60.4
2016-10-29 07:59:59	72
2016-10-29 08:09:59	74
2016-10-29 08:19:59	82.2
2016-10-29 08:29:59	99.2
2016-10-29 08:39:59	116.8
2016-10-29 08:49:59	113
2016-10-29 08:59:59	101.4
2016-10-29 09:09:59	116.6
2016-10-29 09:19:59	126.2
2016-10-29 09:29:59	123.8
2016-10-29 09:39:59	115.4
2016-10-29 09:49:59	118.8
2016-10-29 09:59:59	115.6
2016-10-29 10:09:59	132
2016-10-29 10:19:59	146.4
2016-10-29 10:29:59	131
2016-10-29 10:39:59	152.4
2016-10-29 10:49:59	169.2
2016-10-29 10:59:59	164.4
2016-10-29 11:09:59	161.2
2016-10-29 11:19:59	150.6
2016-10-29 11:29:59	157.6
2016-10-29 11:39:59	166.2
2016-10-29 11:49:59	169.6
2016-10-29 11:59:59	186.8
2016-10-29 12:09:59	181.2
2016-10-29 12:19:59	185
2016-10-29 12:29:59	186.8
2016-10-29 12:39:59	194.8
2016-10-29 12:49:59	191.2
2016-10-29 12:59:59	187.8
2016-10-29 13:09:59	196
2016-10-29 13:19:59	210
2016-10-29 13:29:59	230.8
2016-10-29 13:39:59	290.2
2016-10-29 13:49:59	222.2
2016-10-29 13:59:59	206
2016-10-29 14:09:59	226.2
2016-10-29 14:19:59	277.6
2016-10-29 14:29:59	262.2
2016-10-29 14:39:59	247.2
2016-10-29 14:49:59	336.4
2016-10-29 14:59:59	306.6
2016-10-29 15:09:59	271.4
2016-10-29 15:19:59	224.6
2016-10-29 15:29:59	163.6
2016-10-29 15:39:59	146.8
2016-10-29 15:49:59	172
2016-10-29 15:59:59	153.4
2016-10-29 16:09:59	131
2016-10-29 16:19:59	117.2
2016-10-29 16:29:59	108.2
2016-10-29 16:39:59	93.6
2016-10-29 16:49:59	81.2
2016-10-29 16:59:59	65.8
2016-10-29 17:09:59	52.2
2016-10-29 17:19:59	41.2
2016-10-29 17:29:59	31.8
2016-10-29 17:39:59	24.4
2016-10-29 17:49:59	15.2
2016-10-29 17:59:59	6.8
2016-10-29 18:09:59	2.2
2016-10-29 18:19:59	0.4
2016-10-29 18:29:59	0
2016-10-29 18:39:59	0
2016-10-29 18:49:59	0
2016-10-29 18:59:59	0
2016-10-29 19:09:59	0
2016-10-29 19:19:59	0
2016-10-29 19:29:59	0
2016-10-29 19:39:59	0
2016-10-29 19:49:59	0
2016-10-29 19:59:59	0
2016-10-29 20:09:59	0
2016-10-29 20:19:59	0
2016-10-29 20:29:59	0
2016-10-29 20:39:59	0
2016-10-29 20:49:59	0
2016-10-29 20:59:59	0
2016-10-29 21:09:59	0
2016-10-29 21:19:59	0
2016-10-29 21:29:59	0
2016-10-29 21:39:59	0
2016-10-29 21:49:59	0
2016-10-29 21:59:59	0
2016-10-29 22:09:59	0
2016-10-29 22:19:59	0
2016-10-29 22:29:59	0
2016-10-29 22:39:59	0
2016-10-29 22:49:59	0
2016-10-29 22:59:59	0
2016-10-29 23:09:59	0
2016-10-29 23:19:59	0
2016-10-29 23:29:59	0
2016-10-29 23:39:59	0
2016-10-29 23:49:59	0
2016-10-29 23:59:59	0
2016-10-30 00:09:59	0
2016-10-30 00:19:59	0
2016-10-30 00:29:59	0
2016-10-30 00:39:59	0
2016-10-30 00:49:59	0
2016-10-30 00:59:59	0
2016-10-30 01:09:59	0
2016-10-30 01:19:59	0
2016-10-30 01:29:59	0
2016-10-30 01:39:59	0
2016-10-30 01:49:59	0
2016-10-30 01:59:59	0
2016-10-30 02:09:59	0
2016-10-30 02:19:59	0
2016-10-30 02:29:59	0
2016-10-30 02:39:59	0
2016-10-30 02:49:59	0
2016-10-30 02:59:59	0
2016-10-30 03:09:59	0
2016-10-30 03:19:59	0
2016-10-30 03:29:59	0
2016-10-30 03:39:59	0
2016-10-30 03:49:59	0
2016-10-30 03:59:59	0
2016-10-30 04:09:59	0
2016-10-30 04:19:59	0
2016-10-30 04:29:59	0
2016-10-30 04:39:59	0
2016-10-30 04:49:59	0
2016-10-30 04:59:59	0
2016-10-30 05:09:59	0
2016-10-30 05:19:59	0
2016-10-30 05:29:59	0
2016-10-30 05:39:59	0
2016-10-30 05:49:59	0
2016-10-30 05:59:59	0
2016-10-30 06:09:59	1.4
2016-10-30 06:19:59	7.4
2016-10-30 06:29:59	21.4
2016-10-30 06:39:59	42.8
2016-10-30 06:49:59	66.4
2016-10-30 06:59:59	91.6
2016-10-30 07:09:59	106
2016-10-30 07:19:59	103.4
2016-10-30 07:29:59	126
2016-10-30 07:39:59	164
2016-10-30 07:49:59	170.2
2016-10-30 07:59:59	207.2
2016-10-30 08:09:59	243.4
2016-10-30 08:19:59	220.6
2016-10-30 08:29:59	310.8
2016-10-30 08:39:59	315
2016-10-30 08:49:59	298.8
2016-10-30 08:59:59	320.6
2016-10-30 09:09:59	303.4
2016-10-30 09:19:59	223
2016-10-30 09:29:59	215.8
2016-10-30 09:39:59	337.6
2016-10-30 09:49:59	390.4
2016-10-30 09:59:59	444.6
2016-10-30 10:09:59	511.6
2016-10-30 10:19:59	431.8
2016-10-30 10:29:59	536.4
2016-10-30 10:39:59	581.2
2016-10-30 10:49:59	596.4
2016-10-30 10:59:59	603.6
2016-10-30 11:09:59	617.6
2016-10-30 11:19:59	616.2
2016-10-30 11:29:59	629.8
2016-10-30 11:39:59	589.2
2016-10-30 11:49:59	541.6
2016-10-30 11:59:59	655.6
2016-10-30 12:09:59	551.2
2016-10-30 12:19:59	674.6
2016-10-30 12:29:59	664.2
2016-10-30 12:39:59	595
2016-10-30 12:49:59	641.2
2016-10-30 12:59:59	681.2
2016-10-30 13:09:59	668.8
2016-10-30 13:19:59	632
2016-10-30 13:29:59	593.2
2016-10-30 13:39:59	505.8
2016-10-30 13:49:59	499
2016-10-30 13:59:59	422.2
2016-10-30 14:09:59	360.4
2016-10-30 14:19:59	369.4
2016-10-30 14:29:59	371
2016-10-30 14:39:59	360.6
2016-10-30 14:49:59	359.2
2016-10-30 14:59:59	350.4
2016-10-30 15:09:59	340.8
2016-10-30 15:19:59	330
2016-10-30 15:29:59	245.8
2016-10-30 15:39:59	209.2
2016-10-30 15:49:59	214.6
2016-10-30 15:59:59	225.8
2016-10-30 16:09:59	185.8
2016-10-30 16:19:59	147.8
2016-10-30 16:29:59	120.6
2016-10-30 16:39:59	93
2016-10-30 16:49:59	76.4
2016-10-30 16:59:59	64.6
2016-10-30 17:09:59	55
2016-10-30 17:19:59	49.2
2016-10-30 17:29:59	41.8
2016-10-30 17:39:59	28.8
2016-10-30 17:49:59	16
2016-10-30 17:59:59	7.8
2016-10-30 18:09:59	3
2016-10-30 18:19:59	0.2
2016-10-30 18:29:59	0
2016-10-30 18:39:59	0
2016-10-30 18:49:59	0
2016-10-30 18:59:59	0
2016-10-30 19:09:59	0
2016-10-30 19:19:59	0
2016-10-30 19:29:59	0
2016-10-30 19:39:59	0
2016-10-30 19:49:59	0
2016-10-30 19:59:59	0
2016-10-30 20:09:59	0
2016-10-30 20:19:59	0
2016-10-30 20:29:59	0
2016-10-30 20:39:59	0
2016-10-30 20:49:59	0
2016-10-30 20:59:59	0
2016-10-30 21:09:59	0
2016-10-30 21:19:59	0
2016-10-30 21:29:59	0
2016-10-30 21:39:59	0
2016-10-30 21:49:59	0
2016-10-30 21:59:59	0
2016-10-30 22:09:59	0
2016-10-30 22:19:59	0
2016-10-30 22:29:59	0
2016-10-30 22:39:59	0
2016-10-30 22:49:59	0
2016-10-30 22:59:59	0
2016-10-30 23:09:59	0
2016-10-30 23:19:59	0
2016-10-30 23:29:59	0
2016-10-30 23:39:59	0
2016-10-30 23:49:59	0
2016-10-30 23:59:59	0
2016-10-31 00:09:59	0
2016-10-31 00:19:59	0
2016-10-31 00:29:59	0
2016-10-31 00:39:59	0
2016-10-31 00:49:59	0
2016-10-31 00:59:59	0
2016-10-31 01:09:59	0
2016-10-31 01:19:59	0
2016-10-31 01:29:59	0
2016-10-31 01:39:59	0
2016-10-31 01:49:59	0
2016-10-31 01:59:59	0
2016-10-31 02:09:59	0
2016-10-31 02:19:59	0
2016-10-31 02:29:59	0
2016-10-31 02:39:59	0
2016-10-31 02:49:59	0
2016-10-31 02:59:59	0
2016-10-31 03:09:59	0
2016-10-31 03:19:59	0
2016-10-31 03:29:59	0
2016-10-31 03:39:59	0
2016-10-31 03:49:59	0
2016-10-31 03:59:59	0
2016-10-31 04:09:59	0
2016-10-31 04:19:59	0
2016-10-31 04:29:59	0
2016-10-31 04:39:59	0
2016-10-31 04:49:59	0
2016-10-31 04:59:59	0
2016-10-31 05:09:59	0
2016-10-31 05:19:59	0
2016-10-31 05:29:59	0
2016-10-31 05:39:59	0
2016-10-31 05:49:59	0
2016-10-31 05:59:59	0
2016-10-31 06:09:59	0
2016-10-31 06:19:59	0
2016-10-31 06:29:59	0.2
2016-10-31 06:39:59	0.4
2016-10-31 06:49:59	1
2016-10-31 06:59:59	1.4
2016-10-31 07:09:59	2.2
2016-10-31 07:19:59	3.2
2016-10-31 07:29:59	3.4
2016-10-31 07:39:59	4.4
2016-10-31 07:49:59	5.2
2016-10-31 07:59:59	6.6
2016-10-31 08:09:59	9.2
2016-10-31 08:19:59	11.2
2016-10-31 08:29:59	15.2
2016-10-31 08:39:59	10.8
2016-10-31 08:49:59	27.2
2016-10-31 08:59:59	24.4
2016-10-31 09:09:59	30.6
2016-10-31 09:19:59	40.6
2016-10-31 09:29:59	46
2016-10-31 09:39:59	55.6
2016-10-31 09:49:59	69
2016-10-31 09:59:59	82.4
2016-10-31 10:09:59	116.8
2016-10-31 10:19:59	124.2
2016-10-31 10:29:59	121
2016-10-31 10:39:59	112.4
2016-10-31 10:49:59	111.6
2016-10-31 10:59:59	123
2016-10-31 11:09:59	150
2016-10-31 11:19:59	175.4
2016-10-31 11:29:59	204.4
2016-10-31 11:39:59	211.2
2016-10-31 11:49:59	196
2016-10-31 11:59:59	207.2
2016-10-31 12:09:59	226.4
2016-10-31 12:19:59	257.4
2016-10-31 12:29:59	190.2
2016-10-31 12:39:59	158
2016-10-31 12:49:59	132.4
2016-10-31 12:59:59	193.6
2016-10-31 13:09:59	179.8
2016-10-31 13:19:59	184.6
2016-10-31 13:29:59	198.4
2016-10-31 13:39:59	206.2
2016-10-31 13:49:59	164.2
2016-10-31 13:59:59	160.6
2016-10-31 14:09:59	172
2016-10-31 14:19:59	140
2016-10-31 14:29:59	319
2016-10-31 14:39:59	269.6
2016-10-31 14:49:59	255.4
2016-10-31 14:59:59	197
2016-10-31 15:09:59	261
2016-10-31 15:19:59	203.4
2016-10-31 15:29:59	195.8
2016-10-31 15:39:59	160.8
2016-10-31 15:49:59	126.8
2016-10-31 15:59:59	115.6
2016-10-31 16:09:59	121.4
2016-10-31 16:19:59	114.2
2016-10-31 16:29:59	105.2
2016-10-31 16:39:59	88.6
2016-10-31 16:49:59	74.4
2016-10-31 16:59:59	60.2
2016-10-31 17:09:59	44.6
2016-10-31 17:19:59	34.8
2016-10-31 17:29:59	25.2
2016-10-31 17:39:59	18.4
2016-10-31 17:49:59	11.6
2016-10-31 17:59:59	5.4
2016-10-31 18:09:59	1.2
2016-10-31 18:19:59	0.2
2016-10-31 18:29:59	0
2016-10-31 18:39:59	0
2016-10-31 18:49:59	0
2016-10-31 18:59:59	0
2016-10-31 19:09:59	0
2016-10-31 19:19:59	0
2016-10-31 19:29:59	0
2016-10-31 19:39:59	0
2016-10-31 19:49:59	0
2016-10-31 19:59:59	0
2016-10-31 20:09:59	0
2016-10-31 20:19:59	0
2016-10-31 20:29:59	0
2016-10-31 20:39:59	0
2016-10-31 20:49:59	0
2016-10-31 20:59:59	0
2016-10-31 21:09:59	0
2016-10-31 21:19:59	0
2016-10-31 21:29:59	0
2016-10-31 21:39:59	0
2016-10-31 21:49:59	0
2016-10-31 21:59:59	0
2016-10-31 22:09:59	0
2016-10-31 22:19:59	0
2016-10-31 22:29:59	0
2016-10-31 22:39:59	0
2016-10-31 22:49:59	0
2016-10-31 22:59:59	0
2016-10-31 23:09:59	0
2016-10-31 23:19:59	0
2016-10-31 23:29:59	0
2016-10-31 23:39:59	0
2016-10-31 23:49:59	0
2016-10-31 23:59:59	0
2016-11-01 00:09:59	0
2016-11-01 00:19:59	0
2016-11-01 00:29:59	0
2016-11-01 00:39:59	0
2016-11-01 00:49:59	0
2016-11-01 00:59:59	0
2016-11-01 01:09:59	0
2016-11-01 01:19:59	0
2016-11-01 01:29:59	0
2016-11-01 01:39:59	0
2016-11-01 01:49:59	0
2016-11-01 01:59:59	0
2016-11-01 02:09:59	0
2016-11-01 02:19:59	0
2016-11-01 02:29:59	0
2016-11-01 02:39:59	0
2016-11-01 02:49:59	0
2016-11-01 02:59:59	0
2016-11-01 03:09:59	0
2016-11-01 03:19:59	0
2016-11-01 03:29:59	0
2016-11-01 03:39:59	0
2016-11-01 03:49:59	0
2016-11-01 03:59:59	0
2016-11-01 04:09:59	0
2016-11-01 04:19:59	0
2016-11-01 04:29:59	0
2016-11-01 04:39:59	0
2016-11-01 04:49:59	0
2016-11-01 04:59:59	0
2016-11-01 05:09:59	0
2016-11-01 05:19:59	0
2016-11-01 05:29:59	0
2016-11-01 05:39:59	0
2016-11-01 05:49:59	0
2016-11-01 05:59:59	0
2016-11-01 06:09:59	0
2016-11-01 06:19:59	1.6
2016-11-01 06:29:59	5
2016-11-01 06:39:59	9
2016-11-01 06:49:59	11.6
2016-11-01 06:59:59	16.4
2016-11-01 07:09:59	24
2016-11-01 07:19:59	41.4
2016-11-01 07:29:59	59.2
2016-11-01 07:39:59	70.4
2016-11-01 07:49:59	79
2016-11-01 07:59:59	91.8
2016-11-01 08:09:59	103.4
2016-11-01 08:19:59	116.4
2016-11-01 08:29:59	114.2
2016-11-01 08:39:59	111
2016-11-01 08:49:59	132.8
2016-11-01 08:59:59	173
2016-11-01 09:09:59	202.8
2016-11-01 09:19:59	259.4
2016-11-01 09:29:59	324.6
2016-11-01 09:39:59	356
2016-11-01 09:49:59	379.2
2016-11-01 09:59:59	387.2
2016-11-01 10:09:59	376.6
2016-11-01 10:19:59	398.4
2016-11-01 10:29:59	336.2
2016-11-01 10:39:59	300
2016-11-01 10:49:59	383.6
2016-11-01 10:59:59	361.8
2016-11-01 11:09:59	485
2016-11-01 11:19:59	425.2
2016-11-01 11:29:59	545.2
2016-11-01 11:39:59	381.2
2016-11-01 11:49:59	456.4
2016-11-01 11:59:59	475.2
2016-11-01 12:09:59	503.6
2016-11-01 12:19:59	499
2016-11-01 12:29:59	475.4
2016-11-01 12:39:59	453
2016-11-01 12:49:59	450.4
2016-11-01 12:59:59	303
2016-11-01 13:09:59	431
2016-11-01 13:19:59	183.4
2016-11-01 13:29:59	163.4
2016-11-01 13:39:59	101.6
2016-11-01 13:49:59	84.8
2016-11-01 13:59:59	76
2016-11-01 14:09:59	56.2
2016-11-01 14:19:59	32.4
2016-11-01 14:29:59	7.2
2016-11-01 14:39:59	23.2
2016-11-01 14:49:59	26
2016-11-01 14:59:59	26.2
2016-11-01 15:09:59	22.6
2016-11-01 15:19:59	24
2016-11-01 15:29:59	28.4
2016-11-01 15:39:59	33.2
2016-11-01 15:49:59	37.4
2016-11-01 15:59:59	41.2
2016-11-01 16:09:59	46
2016-11-01 16:19:59	52
2016-11-01 16:29:59	56.4
2016-11-01 16:39:59	60.8
2016-11-01 16:49:59	62
2016-11-01 16:59:59	56
2016-11-01 17:09:59	48.2
2016-11-01 17:19:59	39.2
2016-11-01 17:29:59	29
2016-11-01 17:39:59	19.2
2016-11-01 17:49:59	10.2
2016-11-01 17:59:59	4.6
2016-11-01 18:09:59	1
2016-11-01 18:19:59	0
2016-11-01 18:29:59	0
2016-11-01 18:39:59	0
2016-11-01 18:49:59	0
2016-11-01 18:59:59	0
2016-11-01 19:09:59	0
2016-11-01 19:19:59	0
2016-11-01 19:29:59	0
2016-11-01 19:39:59	0
2016-11-01 19:49:59	0
2016-11-01 19:59:59	0
2016-11-01 20:09:59	0
2016-11-01 20:19:59	0
2016-11-01 20:29:59	0
2016-11-01 20:39:59	0
2016-11-01 20:49:59	0
2016-11-01 20:59:59	0
2016-11-01 21:09:59	0
2016-11-01 21:19:59	0
2016-11-01 21:29:59	0
2016-11-01 21:39:59	0
2016-11-01 21:49:59	0
2016-11-01 21:59:59	0
2016-11-01 22:09:59	0
2016-11-01 22:19:59	0
2016-11-01 22:29:59	0
2016-11-01 22:39:59	0
2016-11-01 22:49:59	0
2016-11-01 22:59:59	0
2016-11-01 23:09:59	0
2016-11-01 23:19:59	0
2016-11-01 23:29:59	0
2016-11-01 23:39:59	0
2016-11-01 23:49:59	0
2016-11-01 23:59:59	0
2016-11-02 00:09:59	0
2016-11-02 00:19:59	0
2016-11-02 00:29:59	0
2016-11-02 00:39:59	0
2016-11-02 00:49:59	0
2016-11-02 00:59:59	0
2016-11-02 01:09:59	0
2016-11-02 01:19:59	0
2016-11-02 01:29:59	0
2016-11-02 01:39:59	0
2016-11-02 01:49:59	0
2016-11-02 01:59:59	0
2016-11-02 02:09:59	0
2016-11-02 02:19:59	0
2016-11-02 02:29:59	0
2016-11-02 02:39:59	0
2016-11-02 02:49:59	0
2016-11-02 02:59:59	0
2016-11-02 03:09:59	0
2016-11-02 03:19:59	0
2016-11-02 03:29:59	0
2016-11-02 03:39:59	0
2016-11-02 03:49:59	0
2016-11-02 03:59:59	0
2016-11-02 04:09:59	0
2016-11-02 04:19:59	0
2016-11-02 04:29:59	0
2016-11-02 04:39:59	0
2016-11-02 04:49:59	0
2016-11-02 04:59:59	0
2016-11-02 05:09:59	0
2016-11-02 05:19:59	0
2016-11-02 05:29:59	0
2016-11-02 05:39:59	0
2016-11-02 05:49:59	0
2016-11-02 05:59:59	0
2016-11-02 06:09:59	0
2016-11-02 06:19:59	0
2016-11-02 06:29:59	0
2016-11-02 06:39:59	0
2016-11-02 06:49:59	0
2016-11-02 06:59:59	0
2016-11-02 07:09:59	0
2016-11-02 07:19:59	0.2
2016-11-02 07:29:59	0.6
2016-11-02 07:39:59	1
2016-11-02 07:49:59	1.4
2016-11-02 07:59:59	1
2016-11-02 08:09:59	0.4
2016-11-02 08:19:59	0.2
2016-11-02 08:29:59	0.6
2016-11-02 08:39:59	0.8
2016-11-02 08:49:59	2
2016-11-02 08:59:59	4.6
2016-11-02 09:09:59	3.4
2016-11-02 09:19:59	2.8
2016-11-02 09:29:59	3.4
2016-11-02 09:39:59	3.2
2016-11-02 09:49:59	2.4
2016-11-02 09:59:59	1.8
2016-11-02 10:09:59	1.8
2016-11-02 10:19:59	2.8
2016-11-02 10:29:59	3.2
2016-11-02 10:39:59	4.8
2016-11-02 10:49:59	4.4
2016-11-02 10:59:59	5.2
2016-11-02 11:09:59	7.6
2016-11-02 11:19:59	7.2
2016-11-02 11:29:59	5.6
2016-11-02 11:39:59	3.4
2016-11-02 11:49:59	7
2016-11-02 11:59:59	10
2016-11-02 12:09:59	9.4
2016-11-02 12:19:59	11
2016-11-02 12:29:59	10.2
2016-11-02 12:39:59	16.6
2016-11-02 12:49:59	16
2016-11-02 12:59:59	13
2016-11-02 13:09:59	10.4
2016-11-02 13:19:59	11.8
2016-11-02 13:29:59	11.6
2016-11-02 13:39:59	7.2
2016-11-02 13:49:59	8
2016-11-02 13:59:59	13.8
2016-11-02 14:09:59	17.4
2016-11-02 14:19:59	18.4
2016-11-02 14:29:59	15.8
2016-11-02 14:39:59	12.2
2016-11-02 14:49:59	10.6
2016-11-02 14:59:59	9
2016-11-02 15:09:59	7
2016-11-02 15:19:59	6
2016-11-02 15:29:59	4.8
2016-11-02 15:39:59	4.4
2016-11-02 15:49:59	5.6
2016-11-02 15:59:59	5
2016-11-02 16:09:59	3
2016-11-02 16:19:59	2.6
2016-11-02 16:29:59	3
2016-11-02 16:39:59	1.4
2016-11-02 16:49:59	1.4
2016-11-02 16:59:59	1.4
2016-11-02 17:09:59	1.2
2016-11-02 17:19:59	0.8
2016-11-02 17:29:59	0.2
2016-11-02 17:39:59	0.2
2016-11-02 17:49:59	0
2016-11-02 17:59:59	0
2016-11-02 18:09:59	0
2016-11-02 18:19:59	0
2016-11-02 18:29:59	0
2016-11-02 18:39:59	0
2016-11-02 18:49:59	0
2016-11-02 18:59:59	0
2016-11-02 19:09:59	0
2016-11-02 19:19:59	0
2016-11-02 19:29:59	0
2016-11-02 19:39:59	0
2016-11-02 19:49:59	0
2016-11-02 19:59:59	0
2016-11-02 20:09:59	0
2016-11-02 20:19:59	0
2016-11-02 20:29:59	0
2016-11-02 20:39:59	0
2016-11-02 20:49:59	0
2016-11-02 20:59:59	0
2016-11-02 21:09:59	0
2016-11-02 21:19:59	0
2016-11-02 21:29:59	0
2016-11-02 21:39:59	0
2016-11-02 21:49:59	0
2016-11-02 21:59:59	0
2016-11-02 22:09:59	0
2016-11-02 22:19:59	0
2016-11-02 22:29:59	0
2016-11-02 22:39:59	0
2016-11-02 22:49:59	0
2016-11-02 22:59:59	0
2016-11-02 23:09:59	0
2016-11-02 23:19:59	0
2016-11-02 23:29:59	0
2016-11-02 23:39:59	0
2016-11-02 23:49:59	0
2016-11-02 23:59:59	0
2016-11-03 00:09:59	0
2016-11-03 00:19:59	0
2016-11-03 00:29:59	0
2016-11-03 00:39:59	0
2016-11-03 00:49:59	0
2016-11-03 00:59:59	0
2016-11-03 01:09:59	0
2016-11-03 01:19:59	0
2016-11-03 01:29:59	0
2016-11-03 01:39:59	0
2016-11-03 01:49:59	0
2016-11-03 01:59:59	0
2016-11-03 02:09:59	0
2016-11-03 02:19:59	0
2016-11-03 02:29:59	0
2016-11-03 02:39:59	0
2016-11-03 02:49:59	0
2016-11-03 02:59:59	0
2016-11-03 03:09:59	0
2016-11-03 03:19:59	0
2016-11-03 03:29:59	0
2016-11-03 03:39:59	0
2016-11-03 03:49:59	0
2016-11-03 03:59:59	0
2016-11-03 04:09:59	0
2016-11-03 04:19:59	0
2016-11-03 04:29:59	0
2016-11-03 04:39:59	0
2016-11-03 04:49:59	0
2016-11-03 04:59:59	0
2016-11-03 05:09:59	0
2016-11-03 05:19:59	0
2016-11-03 05:29:59	0
2016-11-03 05:39:59	0
2016-11-03 05:49:59	0
2016-11-03 05:59:59	0
2016-11-03 06:09:59	0
2016-11-03 06:19:59	0
2016-11-03 06:29:59	0
2016-11-03 06:39:59	0
2016-11-03 06:49:59	0
2016-11-03 06:59:59	0
2016-11-03 07:09:59	0.2
2016-11-03 07:19:59	0.4
2016-11-03 07:29:59	0.2
2016-11-03 07:39:59	0.4
2016-11-03 07:49:59	0.6
2016-11-03 07:59:59	1
2016-11-03 08:09:59	4.4
2016-11-03 08:19:59	7.6
2016-11-03 08:29:59	8.4
2016-11-03 08:39:59	6.6
2016-11-03 08:49:59	6.4
2016-11-03 08:59:59	6
2016-11-03 09:09:59	5.8
2016-11-03 09:19:59	5
2016-11-03 09:29:59	4.6
2016-11-03 09:39:59	4
2016-11-03 09:49:59	3.8
2016-11-03 09:59:59	4.6
2016-11-03 10:09:59	3.6
2016-11-03 10:19:59	3.2
2016-11-03 10:29:59	4.2
2016-11-03 10:39:59	2.8
2016-11-03 10:49:59	4.2
2016-11-03 10:59:59	5
2016-11-03 11:09:59	3.8
2016-11-03 11:19:59	4.8
2016-11-03 11:29:59	5
2016-11-03 11:39:59	8.2
2016-11-03 11:49:59	11
2016-11-03 11:59:59	10.8
2016-11-03 12:09:59	8.6
2016-11-03 12:19:59	12.4
2016-11-03 12:29:59	16.6
2016-11-03 12:39:59	24.4
2016-11-03 12:49:59	30.6
2016-11-03 12:59:59	31.8
2016-11-03 13:09:59	32.8
2016-11-03 13:19:59	34.8
2016-11-03 13:29:59	33
2016-11-03 13:39:59	39.4
2016-11-03 13:49:59	47
2016-11-03 13:59:59	53.4
2016-11-03 14:09:59	59.8
2016-11-03 14:19:59	66.6
2016-11-03 14:29:59	70.8
2016-11-03 14:39:59	76
2016-11-03 14:49:59	74.4
2016-11-03 14:59:59	74
2016-11-03 15:09:59	66.6
2016-11-03 15:19:59	60.4
2016-11-03 15:29:59	54.6
2016-11-03 15:39:59	48.8
2016-11-03 15:49:59	39.8
2016-11-03 15:59:59	35.6
2016-11-03 16:09:59	33.4
2016-11-03 16:19:59	27.2
2016-11-03 16:29:59	15.4
2016-11-03 16:39:59	5.2
2016-11-03 16:49:59	2.4
2016-11-03 16:59:59	4.6
2016-11-03 17:09:59	4
2016-11-03 17:19:59	3.8
2016-11-03 17:29:59	3.4
2016-11-03 17:39:59	2.4
2016-11-03 17:49:59	1.6
2016-11-03 17:59:59	1
2016-11-03 18:09:59	0
2016-11-03 18:19:59	0
2016-11-03 18:29:59	0
2016-11-03 18:39:59	0
2016-11-03 18:49:59	0
2016-11-03 18:59:59	0
2016-11-03 19:09:59	0
2016-11-03 19:19:59	0
2016-11-03 19:29:59	0
2016-11-03 19:39:59	0
2016-11-03 19:49:59	0
2016-11-03 19:59:59	0
2016-11-03 20:09:59	0
2016-11-03 20:19:59	0
2016-11-03 20:29:59	0
2016-11-03 20:39:59	0
2016-11-03 20:49:59	0
2016-11-03 20:59:59	0
2016-11-03 21:09:59	0
[truncated: 51,998 more rows]

## Sheet: Rainfall wind and cloud
Taken from website: worldwideweatheronline.com
The website only provides monthly averages
Average Rainfall (mm)	Average Wind speed (mph)	Average Cloud cover (%)
122.46	5.4	41
163.5	5.1	37
234.3	4.9	41
128.5	4.7	34
126.3	5.6	45
185.2	4.9	42
173.7	4.3	28
97.1	4.5	33
151	4.3	38
78.7	4.7	26

## Sheet: Sedimentation
Location	Sample with replicates	Sus.solids dry wt (g)	Sediment dry wt (g)	Total dry sediment (g)
EVE'S Garden S1	Sub 1		347.1	347.1
	Sub 2		338.14	338.14
	Sub 3		232.29	232.29
	Sub 4		437.11	437.11
	1.1		668.86	668.86
	1.2		642.16	642.16
	1.3		645.61	645.61
	2.1	0.0079	41.54	41.5479
	2.2	0.0243	38.17	38.1943
	2.3	0.0056	65.93	65.9356
	3.1	0.0066	277.93	277.937
	3.2	0.0129	232.81	232.823
	3.3	0.016	8.43	8.446
	4.1	0.0207	208.66	208.681
	4.2	0.0158	187.36	187.376
	4.3	0.0172	162.19	162.207
EVE'S Garden S2	1		333	333
	3		231.46	231.46
	3 with round		179.85	179.85
	1.1	0.0419	532.05	532.092
	1.2	0.009	431.88	431.889
	1.3	0.0205	389.72	389.741
	2.1	0.0123	427.28	427.292
	2.2	0.3439	395.2	395.544
	2.3	0.0132	407.41	407.423
	3.1	0.0223	123.1	123.122
	3.2	0.02	208.42	208.44
	3.3	0.0835	205.29	205.373
Siwa shallow S1	Sub 1	0.1043	330.94	331.044
	Sub 2	0.0089	375.1	375.109
	Sub 3	0.0126	185.39	185.403
	Sub 4	0.0129	207.62	207.633
	1.1	0.0233	433.71	433.733
	1.2	0.0264	395.1	395.126
	1.3	0.0463	299.7	299.746
	2.1	0.0317	81.22	81.2517
	2.2	0.0314	88.96	88.9914
	2.3	0.009	50.81	50.819
	3.1	0.0122	115.82	115.832
	3.2	0.0036	123.55	123.554
	3.3	0.0029	141.13	141.133
	4.1	0.0086	309.07	309.079
	4.2	0.0144	358.49	358.504
	4.3	0.0193	382.9	382.919
Siwa shallow S2	Sub 1	0.0839	221.44	221.524
	Sub 2	0.1133	276.16	276.273
	Sub 3	0.0788	245.98	246.059
	Sub 4	0.0358	250.07	250.106
	1.1	0.0774	78.95	79.0274
	1.2	0.0142	61.66	61.6742
	1.3	0.016	96.85	96.866
	2.1	0.0121	77.85	77.8621
	2.2	0.0046	34.96	34.9646
	2.3	0.0117	30.8	30.8117
	3.1	0.0073	58.89	58.8973
	3.2	0.0213	41.66	41.6813
	3.3	0.0043	13.71	13.7143
	4.1	0.1186	104.67	104.789
	4.2	0.031	9.22	9.251
	4.3	0.0161	1.82	1.8361
Anenome (S1)	Sub 1		222.24	222.24
	Sub 2		318.11	318.11
	Sub 3		254.91	254.91
	Sub 4		185.97	185.97
	1.1	0.0084	112.45	112.458
	1.2	0.008	139.82	139.828
	1.3	0.0203	139.77	139.79
	2.1	0.0085	1.94	1.9485
	2.2	0.0035	1.28	1.2835
	2.3	0.0041	4.8	4.8041
	3.1	0.0192	99.72	99.7392
	3.2	0.0081	144.97	144.978
	3.3	0.0258	133.34	133.366
	4.1	0.0362	31.3	31.3362
	4.2	0.0365	63.88	63.9165
	4.3	0.0073	13.06	13.0673
Anenome (S2)	Sub 2		163.82	163.82
	Sub 3		340.66	340.66
	Sub 4		285.28	285.28
	2.1	0.0184	114.08	114.098
	2.2	0.0152	215.32	215.335
	2.3	0.0268	143.85	143.877
	3.1	0.0137	455.8	455.814
	3.2	0.0107	221.69	221.701
	3.3	0.0123	457.15	457.162
	4.1	0.0131	60.51	60.5231
	4.2	0.0142	113.35	113.364
	4.3	0.0304	129.57	129.6

## Sheet: Particle size
EVES GARDEN
		EGST1Sub1	EGST1Sub2	EGST1Sub3	EGST1Sub4	EGST1.1	EGST1.2	EGST1.3	EGST2.1	EGST2.2	EGST2.3	EGST3.1	EGST3.2	EGST3.3	EGST4.1	EGST4.2	EGST4.3	EGST2Sub1	EGST2Sub2	EGST2Sub3	EGST2.1.1	EGST2.1.2	EGST2.1.3	EGST2.2.1	EGST2.2.2	EGST2.2.3	EGST2.3.1	EGST2.3.2	EGST2.3.3
	ANALYST AND DATE:	,	,	,	,	,	,	,	,	,	,	,	,	,	,	,	,	,	,	,	,	,	,	,	,	,	,	,	,
	SIEVING ERROR:
	SAMPLE TYPE:	Trimodal, Moderately Sorted	Trimodal, Moderately Well Sorted	Polymodal, Poorly Sorted	Trimodal, Moderately Sorted	Trimodal, Moderately Sorted	Trimodal, Moderately Sorted	Trimodal, Moderately Sorted	Polymodal, Poorly Sorted	Polymodal, Poorly Sorted	Polymodal, Poorly Sorted	Polymodal, Poorly Sorted	Polymodal, Poorly Sorted	Polymodal, Moderately Sorted	Trimodal, Poorly Sorted	Polymodal, Poorly Sorted	Polymodal, Poorly Sorted	Trimodal, Moderately Sorted	Polymodal, Moderately Sorted	Polymodal, Moderately Sorted	Trimodal, Moderately Sorted	Polymodal, Moderately Sorted	Polymodal, Moderately Sorted	Polymodal, Moderately Sorted	Trimodal, Moderately Sorted	Polymodal, Moderately Sorted	Trimodal, Moderately Sorted	Trimodal, Moderately Sorted	Trimodal, Moderately Sorted
	TEXTURAL GROUP:	Sand	Sand	Sand	Sand	Sand	Sand	Sand	Sand	Sand	Sand	Sand	Sand	Sand	Sand	Sand	Sand	Sand	Sand	Sand	Sand	Sand	Sand	Sand	Sand	Sand	Sand	Sand	Sand
	SEDIMENT NAME:	Moderately Sorted Coarse Sand	Moderately Well Sorted Coarse Sand	Poorly Sorted Fine Sand	Moderately Sorted Coarse Sand	Moderately Sorted Coarse Sand	Moderately Sorted Coarse Sand	Moderately Sorted Coarse Sand	Poorly Sorted Very Coarse Sand	Poorly Sorted Coarse Sand	Poorly Sorted Medium Sand	Poorly Sorted Fine Sand	Poorly Sorted Fine Sand	Moderately Sorted Fine Sand	Poorly Sorted Fine Sand	Poorly Sorted Fine Sand	Poorly Sorted Fine Sand	Moderately Sorted Coarse Sand	Moderately Sorted Coarse Sand	Moderately Sorted Medium Sand	Moderately Sorted Coarse Sand	Moderately Sorted Coarse Sand	Moderately Sorted Coarse Sand	Moderately Sorted Medium Sand	Moderately Sorted Medium Sand	Moderately Sorted Medium Sand	Moderately Sorted Medium Sand	Moderately Sorted Medium Sand	Moderately Sorted Medium Sand
METHOD OF	MEAN	592.161	515.182	425.868	544.93	638.76	588.992	614.605	509.277	468.227	459.397	303.246	301.307	278.167	295.505	352.689	324.685	650.764	594.329	541.471	577.894	527.036	543.488	340.65	327.03	336.195	361.102	377.104	374.917
MOMENTS	SORTING	275.429	248.714	328.141	274.45	322.631	314.865	318.146	399.345	364.624	368.089	268.906	260.06	183.423	242.289	293.577	282.648	307.69	348.848	328.278	317.945	295.554	304.028	248.037	228.928	251.046	240.856	231.521	236.907
Arithmetic (mm)	SKEWNESS	0.787696	1.00251	1.06879	0.76812	0.343121	0.541605	0.451375	0.523482	0.739306	0.789759	1.82573	1.79399	0.592102	1.8286	1.4471	1.68676	0.406726	0.437706	0.723141	0.568837	0.80414	0.722261	1.74753	1.8141	1.82872	1.70936	1.68305	1.63539
	KURTOSIS	2.636	3.79882	2.88944	3.04485	1.79036	2.10293	1.93335	1.64288	2.14009	2.15732	5.70056	5.78836	1.7112	6.30219	4.22435	5.00245	1.83597	1.67492	2.13465	2.11365	2.72534	2.49494	5.84912	6.55301	5.99125	5.77516	5.81403	5.60818
METHOD OF	MEAN	528.996	455.829	317.507	472.017	546.497	498.008	524.185	338.366	322.5	314.355	221.175	221.583	218.622	222.216	256.102	237.672	572.003	484.871	445.245	484.542	443.361	455.746	270.359	263.9	267.12	298.486	321.171	314.893
MOMENTS	SORTING	1.61187	1.65613	2.16128	1.74995	1.80903	1.84386	1.81311	2.68874	2.54528	2.53396	2.17498	2.1632	2.03723	2.12369	2.24712	2.16623	1.69145	1.95175	1.89193	1.86845	1.84344	1.86115	1.98215	1.93367	1.95238	1.83695	1.73483	1.78978
Geometric (mm)	SKEWNESS	-0.294518	-0.48705	0.0856862	-0.636092	-0.768219	-0.698949	-0.698847	-0.410354	-0.422176	-0.316331	0.188791	0.145799	-0.129469	-0.013412	-0.0593877	0.204323	-0.570352	-0.434731	-0.180684	-0.623696	-0.519134	-0.576878	-0.195614	-0.222764	0.00847265	0.0191144	0.181267	0.0185373
	KURTOSIS	3.34828	3.73612	2.13662	3.33928	3.80974	3.8028	3.74203	2.25732	2.4634	2.38027	2.95126	2.85697	2.18238	3.04156	2.76522	2.8694	3.45562	2.75438	2.54622	3.50703	3.40814	3.49968	3.58914	3.65818	3.47083	3.35535	3.0929	3.27418
METHOD OF	MEAN	0.918672	1.13344	1.65514	1.08309	0.871713	1.00576	0.931853	1.56334	1.63263	1.66953	2.17674	2.17408	2.19349	2.16996	1.96521	2.07295	0.805906	1.04433	1.16733	1.04531	1.17345	1.1337	1.88705	1.92194	1.90444	1.74427	1.63859	1.66707
MOMENTS	SORTING	0.688736	0.727812	1.11189	0.80731	0.855214	0.882729	0.858467	1.42693	1.34782	1.34139	1.121	1.11317	1.02661	1.08657	1.16808	1.11519	0.758261	0.964772	0.91986	0.90184	0.882404	0.896198	0.987068	0.951342	0.965233	0.87731	0.794796	0.839786
Logarithmic (f)	SKEWNESS	0.294518	0.48705	-0.0856862	0.636092	0.768219	0.698949	0.698847	0.410354	0.422176	0.316331	-0.188791	-0.145799	0.129469	0.013412	0.0593877	-0.204323	0.570352	0.434731	0.180684	0.623696	0.519134	0.576878	0.195614	0.222764	-0.00847265	-0.0191144	-0.181267	-0.0185373
	KURTOSIS	3.34828	3.73612	2.13662	3.33928	3.80974	3.8028	3.74203	2.25732	2.4634	2.38027	2.95126	2.85697	2.18238	3.04156	2.76522	2.8694	3.45562	2.75438	2.54622	3.50703	3.40814	3.49968	3.58914	3.65818	3.47083	3.35535	3.0929	3.27418
FOLK AND	MEAN	541.708	438.176	284.195	441.802	549.586	536.255	543.303	346.482	342.576	340.153	259.997	260.235	259.441	261	270.9	264.951	556.286	533.328	521.151	532.632	518.459	523.377	273.606	271.759	272.11	280.753	341.205	285.978
WARD METHOD	SORTING	1.73143	1.5229	2.01445	1.67596	1.76994	1.92738	1.91393	2.61219	2.58221	2.58009	2.17376	2.17013	1.98526	2.15292	2.1947	2.16777	1.74793	1.9573	1.94681	1.93694	1.92758	1.93415	1.95331	1.79103	1.95133	1.92864	1.66996	1.91177
(mm)	SKEWNESS	-0.0116109	-0.363282	0.144428	-0.507667	-0.0298952	-0.150096	-0.145986	0.0942363	0.0952063	0.11395	0.0595375	0.0544367	-0.0738225	0.0302095	0.0274421	0.0604919	-0.017664	-0.138061	-0.113757	-0.149895	-0.152053	-0.151386	0.135533	0.00674869	0.143563	0.140599	0.481852	0.144644
	KURTOSIS	3.74793	0.864842	0.655384	1.22709	0.865224	1.16099	0.673527	0.596163	0.829386	0.822516	1.43353	1.4116	0.657671	1.41489	0.847875	0.855074	0.869927	0.657777	1.10519	1.15099	1.16038	1.15986	0.70047	0.886986	1.19847	1.19894	1.1829	1.18321
FOLK AND	MEAN	0.884412	1.19042	1.81504	1.17853	0.863582	0.89901	0.88017	1.52915	1.5455	1.55575	1.94343	1.94211	1.94652	1.93788	1.88417	1.9162	0.846101	0.906905	0.940226	0.908788	0.947698	0.934077	1.86983	1.8796	1.87774	1.83263	1.55129	1.80602
WARD METHOD	SORTING	0.791964	0.606817	1.01038	0.744991	0.823697	0.946639	0.936538	1.38526	1.36861	1.36742	1.12019	1.11778	0.989329	1.10629	1.13402	1.11621	0.80565	0.968864	0.961112	0.953776	0.946787	0.951702	0.965923	0.840792	0.964461	0.947584	0.739812	0.934906
(f)	SKEWNESS	0.0116109	0.363282	-0.144428	0.507667	0.0298952	0.150096	0.145986	-0.0942363	-0.0952063	-0.11395	-0.0595375	-0.0544367	0.0738225	-0.0302095	-0.0274421	-0.0604919	0.017664	0.138061	0.113757	0.149895	0.152053	0.151386	-0.135533	-0.00674869	-0.143563	-0.140599	-0.481852	-0.144644
	KURTOSIS	3.74793	0.864842	0.655384	1.22709	0.865224	1.16099	0.673527	0.596163	0.829386	0.822516	1.43353	1.4116	0.657671	1.41489	0.847875	0.855074	0.869927	0.657777	1.10519	1.15099	1.16038	1.15986	0.70047	0.886986	1.19847	1.19894	1.1829	1.18321
FOLK AND	MEAN:	Coarse Sand	Medium Sand	Medium Sand	Medium Sand	Coarse Sand	Coarse Sand	Coarse Sand	Medium Sand	Medium Sand	Medium Sand	Medium Sand	Medium Sand	Medium Sand	Medium Sand	Medium Sand	Medium Sand	Coarse Sand	Coarse Sand	Coarse Sand	Coarse Sand	Coarse Sand	Coarse Sand	Medium Sand	Medium Sand	Medium Sand	Medium Sand	Medium Sand	Medium Sand
WARD METHOD	SORTING:	Moderately Sorted	Moderately Well Sorted	Poorly Sorted	Moderately Sorted	Moderately Sorted	Moderately Sorted	Moderately Sorted	Poorly Sorted	Poorly Sorted	Poorly Sorted	Poorly Sorted	Poorly Sorted	Moderately Sorted	Poorly Sorted	Poorly Sorted	Poorly Sorted	Moderately Sorted	Moderately Sorted	Moderately Sorted	Moderately Sorted	Moderately Sorted	Moderately Sorted	Moderately Sorted	Moderately Sorted	Moderately Sorted	Moderately Sorted	Moderately Sorted	Moderately Sorted
(Description)	SKEWNESS:	Symmetrical	Very Fine Skewed	Coarse Skewed	Very Fine Skewed	Symmetrical	Fine Skewed	Fine Skewed	Symmetrical	Symmetrical	Coarse Skewed	Symmetrical	Symmetrical	Symmetrical	Symmetrical	Symmetrical	Symmetrical	Symmetrical	Fine Skewed	Fine Skewed	Fine Skewed	Fine Skewed	Fine Skewed	Coarse Skewed	Symmetrical	Coarse Skewed	Coarse Skewed	Very Coarse Skewed	Coarse Skewed
	KURTOSIS:	Extremely Leptokurtic	Platykurtic	Very Platykurtic	Leptokurtic	Platykurtic	Leptokurtic	Platykurtic	Very Platykurtic	Platykurtic	Platykurtic	Leptokurtic	Leptokurtic	Very Platykurtic	Leptokurtic	Platykurtic	Platykurtic	Platykurtic	Very Platykurtic	Mesokurtic	Leptokurtic	Leptokurtic	Leptokurtic	Platykurtic	Platykurtic	Leptokurtic	Leptokurtic	Leptokurtic	Leptokurtic
	MODE 1 (mm):	550	550	137.5	550	550	550	550	137.5	550	275	137.5	137.5	137.5	137.5	137.5	137.5	550	1090	275	550	550	550	275	275	275	275	275	275
	MODE 2 (mm):	275	275	275	275	1090	1090	1090	275	275	137.5	275	275	550	275	275	275	1090	550	550	1090	275	275	137.5	137.5	137.5	550	550	550
	MODE 3 (mm):	1090	1090	550	1090	275	275	275	550	137.5	550	550	550	275	550	550	550	275	275	1090	275	1090	1090	550	550	550	137.5	137.5	137.5
	MODE 1 (f):	0.868483	0.868483	2.86848	0.868483	0.868483	0.868483	0.868483	2.86848	0.868483	1.86848	2.86848	2.86848	2.86848	2.86848	2.86848	2.86848	0.868483	-0.119393	1.86848	0.868483	0.868483	0.868483	1.86848	1.86848	1.86848	1.86848	1.86848	1.86848
	MODE 2 (f):	1.86848	1.86848	1.86848	1.86848	-0.119393	-0.119393	-0.119393	1.86848	1.86848	2.86848	1.86848	1.86848	0.868483	1.86848	1.86848	1.86848	-0.119393	0.868483	0.868483	-0.119393	1.86848	1.86848	2.86848	2.86848	2.86848	0.868483	0.868483	0.868483
	MODE 3 (f):	-0.119393	-0.119393	0.868483	-0.119393	1.86848	1.86848	1.86848	0.868483	2.86848	0.868483	0.868483	0.868483	1.86848	0.868483	0.868483	0.868483	1.86848	1.86848	-0.119393	1.86848	-0.119393	-0.119393	0.868483	0.868483	0.868483	2.86848	2.86848	2.86848
	D10 (mm):	268.672	258.922	131.13	254.408	262.358	257.214	260.411	125.49	125.885	126.198	125.829	125.607	75	126.028	126.989	127.156	270.085	253.901	252.916	255.22	252.352	252.928	130.229	130.211	130.522	134.845	140.546	137.923
	D50 (mm):	544.694	528.788	281.493	536.238	553.988	541.207	547.644	293.15	291.091	285.16	250.711	251.269	250.769	254.903	265.982	256.494	556.905	534.252	516.625	537.384	525.348	529.335	272.845	271.657	270.932	278.207	282.467	281.745
	D90 (mm):	1086.77	1022.28	1063.05	1062.22	1117.28	1102.6	1110.48	1114.16	1092.69	1093.5	582.304	578.56	563.018	571.36	1001.2	592.996	1116.29	1116.28	1097.76	1100.94	1072.49	1083.61	581.68	573.214	581.759	583.8	584.4	585.256
	(D90 / D10) (mm):	4.04497	3.94823	8.10677	4.17525	4.25862	4.28671	4.26434	8.87845	8.68005	8.66494	4.62774	4.60612	7.5069	4.53359	7.88422	4.66352	4.13311	4.3965	4.34044	4.3137	4.24997	4.28428	4.46659	4.40219	4.45716	4.32942	4.15806	4.24336
	(D90 - D10) (mm):	818.098	763.36	931.915	807.811	854.926	845.389	850.072	988.666	966.802	967.303	456.475	452.953	488.018	445.332	874.216	465.84	846.208	862.375	844.849	845.72	820.137	830.686	451.451	443.003	451.236	448.955	443.853	447.333
	(D75 / D25) (mm):	1.17559	2.01368	3.89801	2.00399	2.05624	2.07739	3.44429	7.20337	4.09775	4.12462	2.19981	2.21651	3.82121	2.19441	3.80973	3.68503	2.02277	3.70488	2.17536	2.10465	2.09951	2.10189	3.45485	2.06074	2.06432	2.04364	2.03856	2.05187
	(D75 - D25) (mm):	88.2104	288.972	416.658	291.606	528.78	310.421	719.465	880.307	442.107	442.177	161.37	163.523	377.844	161.596	387.736	365.773	519.343	749.86	320.467	313.415	304.564	307.436	359.411	154.402	154.328	264.75	268.729	270.508
	D10 (f):	-0.120047	-0.0317934	-0.0882028	-0.0870812	-0.159996	-0.140913	-0.151187	-0.155952	-0.12788	-0.128955	0.780155	0.789461	0.828748	0.807528	-0.00173732	0.753905	-0.158716	-0.158694	-0.134569	-0.138735	-0.100964	-0.11585	0.781702	0.802854	0.781507	0.776453	0.774973	0.77286
	D50 (f):	0.876481	0.91924	1.82883	0.899055	0.852073	0.885746	0.868689	1.77029	1.78046	1.81016	1.9959	1.9927	1.99557	1.97198	1.9106	1.963	0.844498	0.904408	0.95281	0.895976	0.928653	0.917747	1.87385	1.88014	1.88399	1.84577	1.82385	1.82754
	D90 (f):	1.89608	1.94941	2.93092	1.97478	1.93039	1.95896	1.94114	2.99436	2.98982	2.98624	2.99046	2.99301	3.73697	2.98818	2.97723	2.97532	1.88851	1.97766	1.98327	1.97019	1.98649	1.9832	2.94088	2.94107	2.93763	2.89063	2.83088	2.85807
	(D90 / D10) (f):	-15.7945	-61.3151	-33.2294	-22.6775	-12.0652	-13.9019	-12.8393	-19.2005	-23.3798	-23.1572	3.83316	3.79121	4.50917	3.70041	-1713.69	3.94655	-11.8987	-12.4621	-14.738	-14.2011	-19.6753	-17.1187	3.76215	3.66327	3.75893	3.72286	3.65288	3.69804
	(D90 - D10) (f):	2.01613	1.98121	3.01913	2.06186	2.09039	2.09987	2.09232	3.15031	3.1177	3.11519	2.21031	2.20355	2.90822	2.18065	2.97897	2.22142	2.04723	2.13636	2.11784	2.10892	2.08745	2.09905	2.15917	2.13822	2.15613	2.11417	2.05591	2.08521
	(D75 / D25) (f):	1.30717	2.26108	3.34949	2.28446	-23.874	2.42446	-89.1659	-88.8673	3.62925	3.63191	1.64735	1.65733	3.00123	1.64716	3.08031	2.89258	-25.3239	-48.006	2.48786	2.44325	2.36837	2.39192	2.81899	1.6005	1.60089	2.08795	2.1135	2.12433
	(D75 - D25) (f):	0.233382	1.00984	1.96274	1.00288	1.04001	1.05477	1.78421	2.84867	2.03483	2.04426	1.13738	1.14829	1.93403	1.13383	1.92969	1.88168	1.01633	1.88943	1.12125	1.07358	1.07005	1.07169	1.78862	1.04316	1.04567	1.03114	1.02755	1.03694
	% GRAVEL:	0	0	0	0	0	0	0	0	0	0	0	0	0	0	0	0	0	0	0	0	0	0	0	0	0	0	0	0
	% SAND:	0.999481	0.999113	0.99471	0.999655	0.997744	0.996516	0.997474	0.959088	0.961349	0.964366	0.969229	0.971471	0.984146	0.965256	0.968598	0.975622	0.999324	0.997408	0.998614	0.996804	0.997269	0.996737	0.981353	0.982675	0.986387	0.995557	0.999281	0.997618
	% MUD:	0.000518822	0.000887154	0.0052901	0.000345431	0.00225622	0.00348399	0.00252584	0.0409123	0.0386511	0.0356337	0.0307715	0.0285291	0.0158537	0.0347444	0.0314021	0.0243782	0.000675883	0.00259213	0.00138627	0.00319597	0.00273136	0.00326252	0.0186475	0.0173247	0.0136126	0.00444265	0.000718838	0.00238165
	% V COARSE GRAVEL:	0	0	0	0	0	0	0	0	0	0	0	0	0	0	0	0	0	0	0	0	0	0	0	0	0	0	0	0
	% COARSE GRAVEL:	0	0	0	0	0	0	0	0	0	0	0	0	0	0	0	0	0	0	0	0	0	0	0	0	0	0	0	0
	% MEDIUM GRAVEL:	0	0	0	0	0	0	0	0	0	0	0	0	0	0	0	0	0	0	0	0	0	0	0	0	0	0	0	0
	% FINE GRAVEL:	0	0	0	0	0	0	0	0	0	0	0	0	0	0	0	0	0	0	0	0	0	0	0	0	0	0	0	0
	% V FINE GRAVEL:	0	0	0	0	0	0	0	0	0	0	0	0	0	0	0	0	0	0	0	0	0	0	0	0	0	0	0	0
	% V COARSE SAND:	0.201101	0.11536	0.158574	0.157401	0.303066	0.243973	0.272589	0.288267	0.215305	0.217411	0.0746479	0.0651161	0	0.0512709	0.100733	0.0894279	0.298218	0.298138	0.229123	0.238664	0.173256	0.194235	0.066715	0.049976	0.0705649	0.0654281	0.0614367	0.0639642
	% COARSE SAND:	0.563527	0.555063	0.244334	0.55596	0.450019	0.452638	0.454109	0.185281	0.246952	0.215607	0.1544	0.17479	0.286585	0.181647	0.205959	0.164167	0.493579	0.317104	0.330099	0.432302	0.448359	0.444884	0.195705	0.199702	0.173825	0.230291	0.266881	0.264071
	% MEDIUM SAND:	0.223785	0.284244	0.27801	0.20643	0.199788	0.240989	0.223266	0.208794	0.228275	0.240716	0.275242	0.26752	0.217073	0.298927	0.292837	0.286737	0.187803	0.311185	0.363924	0.25831	0.293459	0.278675	0.456536	0.459875	0.457286	0.493861	0.519768	0.499417
	% FINE SAND:	0.0102035	0.042199	0.297106	0.0772845	0.0407614	0.0533223	0.0432027	0.222431	0.217899	0.238761	0.4106	0.403284	0.396341	0.385474	0.328947	0.396902	0.0176344	0.0640688	0.0706443	0.0610242	0.0747882	0.07139	0.233537	0.245429	0.259964	0.189015	0.145397	0.157578
	% V FINE SAND:	0.000864703	0.00224746	0.0166875	0.00257922	0.00410902	0.00559314	0.00430787	0.0543146	0.0529183	0.0518719	0.0543388	0.0607605	0.0841463	0.0479366	0.040122	0.038388	0.00208909	0.00691234	0.00482422	0.00650474	0.00740706	0.0075526	0.0288592	0.0276942	0.024748	0.0169628	0.00579863	0.0125887
	% V COARSE SILT:	0.000518822	0.000887154	0.0052901	0.000345431	0.00225622	0.00348399	0.00252584	0.0409123	0.0386511	0.0356337	0.0307715	0.0285291	0.0158537	0.0347444	0.0314021	0.0243782	0.000675883	0.00259213	0.00138627	0.00319597	0.00273136	0.00326252	0.0186475	0.0173247	0.0136126	0.00444265	0.000718838	0.00238165
	% COARSE SILT:	0	0	0	0	0	0	0	0	0	0	0	0	0	0	0	0	0	0	0	0	0	0	0	0	0	0	0	0
	% MEDIUM SILT:	0	0	0	0	0	0	0	0	0	0	0	0	0	0	0	0	0	0	0	0	0	0	0	0	0	0	0	0
	% FINE SILT:	0	0	0	0	0	0	0	0	0	0	0	0	0	0	0	0	0	0	0	0	0	0	0	0	0	0	0	0
	% V FINE SILT:	0	0	0	0	0	0	0	0	0	0	0	0	0	0	0	0	0	0	0	0	0	0	0	0	0	0	0	0
	% CLAY:	0	0	0	0	0	0	0	0	0	0	0	0	0	0	0	0	0	0	0	0	0	0	0	0	0	0	0	0
Siwa
		SW1sub1	SW1sub2	SW1sub3	SW1sub4	SW1.1.1	SW1.1.2	SW1.1.3	SW1.2.1	SW1.2.2	SW1.2.3	SW1.3.1	SW1.3.2	SW1.3.3	SW1.4.1	SW1.4.2	SW1.4.3	SW2sub1	SW2sub2	SW2sub3	SW1sub4	SW2.1.1	SW2.1.2	SW2.1.3	SW2.2.1	SW2.2.2	SW2.2.3	SW2.3.1	SW2.3.2	SW2.3.3	SW2.4.1	SW2.4.2	SW2.4.3
	ANALYST AND DATE:	,	,	,	,	,	,	,	,	,	,	,	,	,	,	,	,	,	,	,	,	,	,	,	,	,	,	,	,	,	,	,	,
	SIEVING ERROR:
	SAMPLE TYPE:	Bimodal, Well Sorted	Bimodal, Moderately Well Sorted	Trimodal, Moderately Sorted	Trimodal, Moderately Sorted	Trimodal, Moderately Sorted	Polymodal, Moderately Sorted	Polymodal, Moderately Sorted	Polymodal, Poorly Sorted	Polymodal, Moderately Sorted	Polymodal, Moderately Sorted	Polymodal, Moderately Sorted	Polymodal, Moderately Sorted	Trimodal, Moderately Sorted	Polymodal, Moderately Sorted	Polymodal, Moderately Sorted	Polymodal, Moderately Sorted	Bimodal, Moderately Well Sorted	Bimodal, Moderately Well Sorted	Bimodal, Moderately Well Sorted	Trimodal, Moderately Well Sorted	Polymodal, Poorly Sorted	Polymodal, Poorly Sorted	Polymodal, Poorly Sorted	Polymodal, Poorly Sorted	Polymodal, Poorly Sorted	Polymodal, Poorly Sorted	Polymodal, Poorly Sorted	Polymodal, Poorly Sorted	Polymodal, Poorly Sorted	Trimodal, Moderately Sorted	Polymodal, Poorly Sorted	Polymodal, Poorly Sorted
	TEXTURAL GROUP:	Sand	Sand	Sand	Sand	Sand	Sand	Sand	Sand	Sand	Sand	Sand	Sand	Sand	Sand	Sand	Sand	Sand	Sand	Sand	Sand	Sand	Sand	Sand	Sand	Sand	Sand	Sand	Sand	Sand	Sand	Sand	Sand
	SEDIMENT NAME:	Well Sorted Very Coarse Sand	Moderately Well Sorted Very Coarse Sand	Moderately Sorted Very Coarse Sand	Moderately Sorted Very Coarse Sand	Moderately Sorted Medium Sand	Moderately Sorted Medium Sand	Moderately Sorted Medium Sand	Poorly Sorted Medium Sand	Moderately Sorted Medium Sand	Moderately Sorted Medium Sand	Moderately Sorted Coarse Sand	Moderately Sorted Coarse Sand	Moderately Sorted Coarse Sand	Moderately Sorted Coarse Sand	Moderately Sorted Coarse Sand	Moderately Sorted Coarse Sand	Moderately Well Sorted Very Coarse Sand	Moderately Well Sorted Very Coarse Sand	Moderately Well Sorted Very Coarse Sand	Moderately Well Sorted Very Coarse Sand	Poorly Sorted Very Coarse Sand	Poorly Sorted Coarse Sand	Poorly Sorted Coarse Sand	Poorly Sorted Very Coarse Sand	Poorly Sorted Medium Sand	Poorly Sorted Medium Sand	Poorly Sorted Very Coarse Sand	Poorly Sorted Very Coarse Sand	Poorly Sorted Medium Sand	Moderately Sorted Very Coarse Sand	Poorly Sorted Very Coarse Sand	Poorly Sorted Very Coarse Sand
METHOD OF	MEAN	974.331	875.593	756.859	784.108	371.254	371.014	372.259	375.933	417.76	393.268	572.92	575.12	587.255	566.83	624.778	572.132	837.252	854.376	830.448	821.544	672.712	555.624	559.953	575.501	403.344	390.471	682.213	568.506	420.101	823.532	575.753	604.648
MOMENTS	SORTING	236.889	290.798	344.791	362.529	240.359	245.227	248.26	289.189	294.658	295.829	309.971	313.161	312.768	337.665	343.245	339.24	322.19	308.912	305.725	321.424	394.95	347.218	356.535	426.465	335.332	312.149	422.921	415.692	345.235	375.975	387.647	400.268
Arithmetic (mm)	SKEWNESS	-1.70132	-0.762636	-0.277237	-0.498478	1.52648	1.52539	1.56272	1.39458	1.1614	1.30845	0.580297	0.555422	0.534736	0.443188	0.265961	0.41447	-0.697842	-0.727903	-0.496828	-0.55181	-0.108442	0.498376	0.437996	0.188996	1.13656	1.21178	-0.237348	0.263424	1.06038	-0.862682	0.33368	0.181955
	KURTOSIS	4.36974	1.95392	1.48169	1.52871	5.34181	5.23658	5.23286	4.11127	3.518	3.7969	2.26926	2.22097	2.15614	2.01925	1.7183	1.98967	1.95325	1.95543	1.65363	1.72469	1.36613	1.90894	1.81637	1.31319	3.00084	3.44721	1.30672	1.36192	2.72451	2.02776	1.4881	1.35553
METHOD OF	MEAN	926.063	807.066	650.843	662.574	304.731	302.19	304.056	285.677	323.891	300.284	482.502	482.099	496.512	444.941	510.256	448.327	742.119	771.803	753.83	731.665	508.009	436.005	430.06	369.922	283.96	282.069	477.805	382.735	298.884	665.788	426.59	441.359
MOMENTS	SORTING	1.42187	1.54666	1.82976	1.91023	1.89798	1.92173	1.89801	2.10965	2.09336	2.10672	1.85412	1.87606	1.84403	2.18674	2.01611	2.20175	1.74535	1.64938	1.61007	1.7034	2.36915	2.10999	2.2076	2.9365	2.37	2.30812	2.72082	2.70641	2.31459	2.20143	2.31048	2.40775
Geometric (mm)	SKEWNESS	-2.60449	-1.45176	-1.09821	-1.07207	-0.359661	-0.342106	-0.2124	-0.0468262	-0.321823	-0.114115	-0.607089	-0.655623	-0.664419	-1.06579	-0.985037	-1.10142	-1.69179	-1.61353	-1.35477	-1.43477	-1.00644	-0.559121	-0.656403	-0.622633	-0.119621	-0.222731	-0.986081	-0.552905	0.00774591	-1.61781	-0.459644	-0.61809
	KURTOSIS	11.7589	5.24402	4.00161	3.28055	3.77458	3.69147	3.55607	2.74122	2.98867	2.79194	3.12097	3.24494	3.39429	4.1947	4.08685	4.24554	6.25687	6.12195	5.53099	5.40138	3.29161	2.74685	2.88156	2.25566	2.47201	2.63982	2.88751	2.28155	2.26844	4.88197	2.25517	2.46976
METHOD OF	MEAN	0.110817	0.309241	0.61962	0.593847	1.71439	1.72647	1.71759	1.80755	1.62642	1.7356	1.05139	1.0526	1.0101	1.16831	0.970707	1.15738	0.430278	0.373696	0.407689	0.450744	0.977073	1.19758	1.21739	1.43471	1.81624	1.82588	1.0655	1.38558	1.74234	0.586866	1.22908	1.17998
MOMENTS	SORTING	0.507792	0.62916	0.871658	0.933746	0.924462	0.942407	0.924488	1.07701	1.06582	1.075	0.890732	0.907705	0.882863	1.12878	1.01158	1.13865	0.803518	0.721925	0.687124	0.768417	1.24437	1.07724	1.14248	1.5541	1.24489	1.20672	1.44404	1.43638	1.21076	1.13844	1.20819	1.26768
Logarithmic (f)	SKEWNESS	2.60449	1.45176	1.09821	1.07207	0.359661	0.342106	0.2124	0.0468262	0.321823	0.114115	0.607089	0.655623	0.664419	1.06579	0.985037	1.10142	1.69179	1.61353	1.35477	1.43477	1.00644	0.559121	0.656403	0.622633	0.119621	0.222731	0.986081	0.552905	-0.00774591	1.61781	0.459644	0.61809
	KURTOSIS	11.7589	5.24402	4.00161	3.28055	3.77458	3.69147	3.55607	2.74122	2.98867	2.79194	3.12097	3.24494	3.39429	4.1947	4.08685	4.24554	6.25687	6.12195	5.53099	5.40138	3.29161	2.74685	2.88156	2.25566	2.47201	2.63982	2.88751	2.28155	2.26844	4.88197	2.25517	2.46976
FOLK AND	MEAN	887.67	853.882	577.677	684.689	283.178	282.328	282.528	277.265	286.31	280.769	531.087	531.346	535.527	525.922	541.65	527.203	842.646	847.405	842.125	838.198	542.906	438.126	436.16	420.77	278.638	277.321	452.466	422.486	334.332	686.462	433.931	438.713
WARD METHOD	SORTING	1.34433	1.4914	1.76583	1.78655	1.9321	1.9398	1.93874	2.15721	1.98695	1.9947	1.94038	1.94501	1.93483	1.99164	1.96597	1.99411	1.5271	1.51305	1.50808	1.52435	2.02896	2.26992	2.2916	2.88157	2.23656	2.21704	2.59502	2.60818	2.52385	1.98333	2.31885	2.51809
(mm)	SKEWNESS	-0.784415	-0.798579	-0.0990839	-0.841911	0.128857	0.129073	0.135208	0.0195896	0.117526	0.136613	-0.162171	-0.163699	-0.158551	-0.176839	-0.174319	-0.179745	-0.796805	-0.798461	-0.779099	-0.786046	-0.236003	-0.289294	-0.295882	-0.421827	0.014494	-0.00110536	-0.462035	-0.357904	0.150915	-0.885554	-0.281618	-0.365796
	KURTOSIS	3.26587	0.837817	0.840154	0.81879	1.17258	1.17489	1.17999	0.838926	1.13117	0.682204	1.18605	1.18546	1.18628	1.16708	0.689796	0.705398	0.876909	0.863059	0.843597	0.857396	0.670123	0.675513	0.672302	0.707952	0.842306	0.849683	0.826917	0.593935	0.82101	1.19952	0.650901	0.801821
FOLK AND	MEAN	0.171905	0.227892	0.791665	0.546479	1.82022	1.82455	1.82353	1.85066	1.80435	1.83254	0.91298	0.912277	0.900969	0.927079	0.884568	0.923568	0.247001	0.238876	0.247894	0.254638	0.881225	1.19058	1.19707	1.2489	1.84354	1.85037	1.14412	1.24303	1.58064	0.542748	1.20446	1.18865
WARD METHOD	SORTING	0.426887	0.576665	0.820344	0.837179	0.950172	0.955908	0.955116	1.10917	0.990557	0.996169	0.956339	0.959779	0.952207	0.993954	0.975244	0.995745	0.610798	0.597463	0.592713	0.608191	1.02074	1.18264	1.19635	1.52685	1.16128	1.14863	1.37574	1.38304	1.33563	0.987926	1.21341	1.33233
(f)	SKEWNESS	0.784415	0.798579	0.0990839	0.841911	-0.128857	-0.129073	-0.135208	-0.0195896	-0.117526	-0.136613	0.162171	0.163699	0.158551	0.176839	0.174319	0.179745	0.796805	0.798461	0.779099	0.786046	0.236003	0.289294	0.295882	0.421827	-0.014494	0.00110536	0.462035	0.357904	-0.150915	0.885554	0.281618	0.365796
	KURTOSIS	3.26587	0.837817	0.840154	0.81879	1.17258	1.17489	1.17999	0.838926	1.13117	0.682204	1.18605	1.18546	1.18628	1.16708	0.689796	0.705398	0.876909	0.863059	0.843597	0.857396	0.670123	0.675513	0.672302	0.707952	0.842306	0.849683	0.826917	0.593935	0.82101	1.19952	0.650901	0.801821
FOLK AND	MEAN:	Coarse Sand	Coarse Sand	Coarse Sand	Coarse Sand	Medium Sand	Medium Sand	Medium Sand	Medium Sand	Medium Sand	Medium Sand	Coarse Sand	Coarse Sand	Coarse Sand	Coarse Sand	Coarse Sand	Coarse Sand	Coarse Sand	Coarse Sand	Coarse Sand	Coarse Sand	Coarse Sand	Medium Sand	Medium Sand	Medium Sand	Medium Sand	Medium Sand	Medium Sand	Medium Sand	Medium Sand	Coarse Sand	Medium Sand	Medium Sand
WARD METHOD	SORTING:	Well Sorted	Moderately Well Sorted	Moderately Sorted	Moderately Sorted	Moderately Sorted	Moderately Sorted	Moderately Sorted	Poorly Sorted	Moderately Sorted	Moderately Sorted	Moderately Sorted	Moderately Sorted	Moderately Sorted	Moderately Sorted	Moderately Sorted	Moderately Sorted	Moderately Well Sorted	Moderately Well Sorted	Moderately Well Sorted	Moderately Well Sorted	Poorly Sorted	Poorly Sorted	Poorly Sorted	Poorly Sorted	Poorly Sorted	Poorly Sorted	Poorly Sorted	Poorly Sorted	Poorly Sorted	Moderately Sorted	Poorly Sorted	Poorly Sorted
(Description)	SKEWNESS:	Very Fine Skewed	Very Fine Skewed	Symmetrical	Very Fine Skewed	Coarse Skewed	Coarse Skewed	Coarse Skewed	Symmetrical	Coarse Skewed	Coarse Skewed	Fine Skewed	Fine Skewed	Fine Skewed	Fine Skewed	Fine Skewed	Fine Skewed	Very Fine Skewed	Very Fine Skewed	Very Fine Skewed	Very Fine Skewed	Fine Skewed	Fine Skewed	Fine Skewed	Very Fine Skewed	Symmetrical	Symmetrical	Very Fine Skewed	Very Fine Skewed	Coarse Skewed	Very Fine Skewed	Fine Skewed	Very Fine Skewed
	KURTOSIS:	Extremely Leptokurtic	Platykurtic	Platykurtic	Platykurtic	Leptokurtic	Leptokurtic	Leptokurtic	Platykurtic	Leptokurtic	Platykurtic	Leptokurtic	Leptokurtic	Leptokurtic	Leptokurtic	Platykurtic	Platykurtic	Platykurtic	Platykurtic	Platykurtic	Platykurtic	Platykurtic	Platykurtic	Platykurtic	Platykurtic	Platykurtic	Platykurtic	Platykurtic	Very Platykurtic	Platykurtic	Leptokurtic	Very Platykurtic	Platykurtic
	MODE 1 (mm):	1090	1090	1090	1090	275	275	275	275	275	275	550	550	550	550	550	550	1090	1090	1090	1090	1090	550	550	137.5	275	275	1090	1090	275	1090	1090	1090
	MODE 2 (mm):	550	550	550	550	550	550	550	137.5	550	550	1090	1090	1090	1090	1090	1090	550	550	550	550	550	1090	1090	275	137.5	137.5	550	275	137.5	550	275	275
	MODE 3 (mm):			275	275	137.5	137.5	137.5	550	137.5	137.5	275	275	275	275	275	275				275	275	275	275	550	550	550	275	137.5	1090	275	550	550
	MODE 1 (f):	-0.119393	-0.119393	-0.119393	-0.119393	1.86848	1.86848	1.86848	1.86848	1.86848	1.86848	0.868483	0.868483	0.868483	0.868483	0.868483	0.868483	-0.119393	-0.119393	-0.119393	-0.119393	-0.119393	0.868483	0.868483	2.86848	1.86848	1.86848	-0.119393	-0.119393	1.86848	-0.119393	-0.119393	-0.119393
	MODE 2 (f):	0.868483	0.868483	0.868483	0.868483	0.868483	0.868483	0.868483	2.86848	0.868483	0.868483	-0.119393	-0.119393	-0.119393	-0.119393	-0.119393	-0.119393	0.868483	0.868483	0.868483	0.868483	0.868483	-0.119393	-0.119393	1.86848	2.86848	2.86848	0.868483	1.86848	2.86848	0.868483	1.86848	1.86848
	MODE 3 (f):			1.86848	1.86848	2.86848	2.86848	2.86848	0.868483	2.86848	2.86848	1.86848	1.86848	1.86848	1.86848	1.86848	1.86848				1.86848	1.86848	1.86848	1.86848	0.868483	0.868483	0.868483	1.86848	2.86848	-0.119393	1.86848	0.868483	0.868483
	D10 (mm):	540.403	512.334	269.211	263.707	134.507	133.742	134.391	129.307	131.966	130.278	252.473	251.697	255.178	140.109	251.936	139.947	292.857	502.991	504.598	290.183	136.971	138.47	135.886	70.3163	125.894	126.096	127.776	125.814	127.981	149.376	134.06	133.05
	D50 (mm):	1064.16	1035.88	596.978	1018.7	281.331	280.741	280.349	275.348	286.941	279.178	538.854	539.304	541.988	535.992	550.581	537.706	1027.42	1031.39	1019.11	1020.21	572.457	528.605	529.889	522.039	274.646	276.369	594.058	514.49	276.17	1037.99	523.433	535.381
	D90 (mm):	1155.86	1149.66	1140.9	1145.82	585.256	586.433	587.618	1007.08	1027.23	1022.85	1095.14	1097.09	1100.78	1103.67	1119.19	1105.42	1147.77	1148.66	1145.91	1146.16	1136.45	1105.65	1109.44	1129.35	1063	1036	1140.93	1126.83	1074.81	1150.12	1122.16	1128.96
	(D90 / D10) (mm):	2.1389	2.24396	4.23796	4.34502	4.35112	4.3848	4.37245	7.78831	7.78402	7.8513	4.33766	4.35877	4.31378	7.87722	4.44233	7.89885	3.91923	2.28366	2.27093	3.94977	8.297	7.9848	8.16449	16.061	8.44356	8.21593	8.92913	8.95633	8.39818	7.69953	8.37056	8.48522
	(D90 - D10) (mm):	615.462	637.321	871.693	882.108	450.749	452.69	453.227	877.775	895.263	892.575	842.67	845.394	845.603	963.564	867.249	965.471	854.914	645.667	641.309	855.973	999.48	967.185	973.553	1059.04	937.102	909.9	1013.15	1001.02	946.827	1000.75	988.096	995.908
	(D75 / D25) (mm):	1.10886	1.97318	2.09853	2.15437	2.0785	2.08402	2.07831	3.71317	2.19462	3.68725	2.07365	2.0797	2.06307	2.16691	3.57533	3.60844	2.0179	1.99898	2.01129	2.0318	3.88455	3.74105	3.80722	7.40232	3.92436	3.85673	4.12468	7.17593	3.95963	2.10971	4.01027	4.04671
	(D75 - D25) (mm):	110.008	545.285	567.802	587.474	274.904	275.396	274.063	390.044	301.233	394.651	307.286	308.731	307.754	322.749	744.644	724.527	555.42	551.316	551.382	557.186	797.612	734.766	745.767	914.578	410.244	403.653	821.751	904.995	418.232	582.135	781.162	795.427
	D10 (f):	-0.208972	-0.201201	-0.190178	-0.196375	0.77286	0.769963	0.767049	-0.0101815	-0.038758	-0.0325989	-0.131119	-0.133683	-0.138528	-0.142313	-0.162449	-0.144592	-0.198835	-0.199948	-0.196491	-0.196803	-0.184536	-0.144901	-0.14983	-0.175496	-0.0881372	-0.0510192	-0.190211	-0.172269	-0.104079	-0.201788	-0.166272	-0.174992
	D50 (f):	-0.0897135	-0.0508598	0.74425	-0.0267256	1.82966	1.83269	1.8347	1.86067	1.80118	1.84074	0.892033	0.890829	0.883668	0.899718	0.860974	0.89511	-0.0390255	-0.0445935	-0.0273083	-0.0288668	0.80476	0.919739	0.916238	0.93777	1.86436	1.85533	0.751323	0.958784	1.85637	-0.0537905	0.933924	0.901362
	D90 (f):	0.887894	0.964843	1.89319	1.92299	2.89425	2.90247	2.89549	2.95113	2.92176	2.94033	1.9858	1.99024	1.97042	2.83537	1.98887	2.83705	1.77173	0.991397	0.986792	1.78497	2.86805	2.85236	2.87953	3.83	2.98971	2.9874	2.96831	2.99064	2.966	2.74298	2.89905	2.90996
	(D90 / D10) (f):	-4.24886	-4.79541	-9.95485	-9.79246	3.74485	3.76963	3.77484	-289.852	-75.3847	-90.1973	-15.1451	-14.8877	-14.2241	-19.9235	-12.2431	-19.6211	-8.91059	-4.95827	-5.02207	-9.06982	-15.5419	-19.6849	-19.2187	-21.8238	-33.9211	-58.5546	-15.6054	-17.3603	-28.4976	-13.5934	-17.4356	-16.6292
	(D90 - D10) (f):	1.09687	1.16604	2.08337	2.11936	2.12139	2.13251	2.12844	2.96131	2.96052	2.97293	2.11692	2.12392	2.10895	2.97769	2.15132	2.98164	1.97057	1.19134	1.18328	1.98177	3.05259	2.99726	3.02936	4.00549	3.07785	3.03842	3.15852	3.16291	3.07008	2.94477	3.06532	3.08495
	(D75 / D25) (f):	0.0924007	-5.77049	-8.1194	-7.34061	2.15173	2.1547	2.14621	3.08989	2.32841	3.12732	2.39787	2.40882	2.40506	2.51054	-37.34	-560.059	-6.29167	-6.05244	-6.57715	-6.6424	-17.9776	-466.55	-116.652	-34.8485	3.2906	3.22354	-16.4208	-38.2206	3.37009	-6.36245	-33.8466	-24.4323
	(D75 - D25) (f):	0.149073	0.980524	1.06938	1.10727	1.05554	1.05937	1.05541	1.89265	1.13397	1.88255	1.05217	1.05637	1.04479	1.11564	1.83808	1.85138	1.01286	0.999262	1.00812	1.02276	1.95775	1.90344	1.92874	2.88798	1.97246	1.94738	2.04428	2.84317	1.98537	1.07704	2.0037	2.01675
	% GRAVEL:	0	0	0	0	0	0	0	0	0	0	0	0	0	0	0	0	0	0	0	0	0	0	0	0	0	0	0	0	0	0	0	0
	% SAND:	0.999879	0.999893	0.998221	0.998846	0.987954	0.987279	0.990395	0.988189	0.986873	0.988538	0.998962	0.99838	0.998297	0.977866	0.991858	0.97695	0.998285	0.999096	0.999187	0.998801	0.983604	0.994326	0.989779	0.943152	0.975659	0.973779	0.96579	0.96808	0.988033	0.990089	0.994493	0.988827
	% MUD:	0.000120518	0.000106508	0.00177907	0.00115401	0.0120463	0.0127213	0.00960477	0.011811	0.0131269	0.0114625	0.00103797	0.00162048	0.00170273	0.0221338	0.0081421	0.0230505	0.00171488	0.00090393	0.000812909	0.0011989	0.0163955	0.00567353	0.0102209	0.0568479	0.0243408	0.0262209	0.0342096	0.03192	0.0119671	0.00991137	0.00550661	0.0111732
	% V COARSE GRAVEL:	0	0	0	0	0	0	0	0	0	0	0	0	0	0	0	0	0	0	0	0	0	0	0	0	0	0	0	0	0	0	0	0
	% COARSE GRAVEL:	0	0	0	0	0	0	0	0	0	0	0	0	0	0	0	0	0	0	0	0	0	0	0	0	0	0	0	0	0	0	0	0
	% MEDIUM GRAVEL:	0	0	0	0	0	0	0	0	0	0	0	0	0	0	0	0	0	0	0	0	0	0	0	0	0	0	0	0	0	0	0	0
	% FINE GRAVEL:	0	0	0	0	0	0	0	0	0	0	0	0	0	0	0	0	0	0	0	0	0	0	0	0	0	0	0	0	0	0	0	0
	% V FINE GRAVEL:	0	0	0	0	0	0	0	0	0	0	0	0	0	0	0	0	0	0	0	0	0	0	0	0	0	0	0	0	0	0	0	0
	% V COARSE SAND:	0.800904	0.635318	0.491239	0.563014	0.0625115	0.066439	0.0706469	0.104454	0.119376	0.11581	0.22178	0.227192	0.23817	0.247514	0.312801	0.253503	0.59768	0.614817	0.564565	0.568757	0.440156	0.254336	0.268429	0.377287	0.158505	0.127171	0.491574	0.35898	0.177263	0.645383	0.329295	0.374302
	% COARSE SAND:	0.172703	0.305517	0.316351	0.207049	0.274714	0.267527	0.256651	0.226993	0.294514	0.238538	0.471931	0.466375	0.469457	0.408058	0.397067	0.409986	0.292477	0.294826	0.353168	0.313711	0.232186	0.353542	0.339769	0.160742	0.193857	0.232711	0.154365	0.167222	0.189978	0.141999	0.227974	0.201117
	% MEDIUM SAND:	0.0203977	0.0507509	0.155588	0.183728	0.461903	0.456247	0.464777	0.358391	0.352743	0.36917	0.218061	0.21439	0.216744	0.211853	0.198533	0.204798	0.0744618	0.0717359	0.0704386	0.0960716	0.173666	0.230183	0.212678	0.166362	0.304839	0.311373	0.144085	0.20081	0.292446	0.111026	0.242291	0.22905
	% FINE SAND:	0.00497138	0.0077218	0.0313764	0.0419291	0.168694	0.174482	0.179077	0.25812	0.189835	0.228261	0.0817403	0.0835359	0.068393	0.0870685	0.0701001	0.0833464	0.0300555	0.0159092	0.00979555	0.0175039	0.108336	0.14119	0.145984	0.170282	0.25268	0.240249	0.125042	0.179371	0.275991	0.0695702	0.162996	0.145251
	% V FINE SAND:	0.000903887	0.000585792	0.00366597	0.00312545	0.0201308	0.0225847	0.019243	0.0402313	0.030405	0.0367589	0.00544936	0.00688705	0.00553388	0.0233726	0.0133564	0.0253165	0.00361027	0.00180786	0.00121936	0.00275746	0.0292597	0.0150754	0.0229197	0.0684788	0.065778	0.0622747	0.0507246	0.061696	0.052356	0.02211	0.0319383	0.0391061
	% V COARSE SILT:	0.000120518	0.000106508	0.00177907	0.00115401	0.0120463	0.0127213	0.00960477	0.011811	0.0131269	0.0114625	0.00103797	0.00162048	0.00170273	0.0221338	0.0081421	0.0230505	0.00171488	0.00090393	0.000812909	0.0011989	0.0163955	0.00567353	0.0102209	0.0568479	0.0243408	0.0262209	0.0342096	0.03192	0.0119671	0.00991137	0.00550661	0.0111732
	% COARSE SILT:	0	0	0	0	0	0	0	0	0	0	0	0	0	0	0	0	0	0	0	0	0	0	0	0	0	0	0	0	0	0	0	0
	% MEDIUM SILT:	0	0	0	0	0	0	0	0	0	0	0	0	0	0	0	0	0	0	0	0	0	0	0	0	0	0	0	0	0	0	0	0
	% FINE SILT:	0	0	0	0	0	0	0	0	0	0	0	0	0	0	0	0	0	0	0	0	0	0	0	0	0	0	0	0	0	0	0	0
	% V FINE SILT:	0	0	0	0	0	0	0	0	0	0	0	0	0	0	0	0	0	0	0	0	0	0	0	0	0	0	0	0	0	0	0	0
	% CLAY:	0	0	0	0	0	0	0	0	0	0	0	0	0	0	0	0	0	0	0	0	0	0	0	0	0	0	0	0	0	0	0	0
Anenome
		ANSub1	ANSub2	ANSub3	ANSub4	AN1.1.1	AN1.1.2	AN1.1.3	AN1.3.1	AN1.3.2	AN1.3.3	AN1.4.1	AN1.4.2	AN1.4.3	ANSub2.2	ANSub2.3	ANSub2.4	AN2.2.1	AN2.2.2	AN2.2.3	AN2.3.1	AN2.3.2	AN2.3.3	AN2.4.1	AN2.4.2	AN2.4.3
	ANALYST AND DATE:	,	,	,	,	,	,	,	,	,	,	,	,	,	,	,	,	,	,	,	,	,	,	,	,	,
	SIEVING ERROR:
	SAMPLE TYPE:	Trimodal, Moderately Sorted	Trimodal, Moderately Well Sorted	Polymodal, Moderately Sorted	Trimodal, Moderately Sorted	Polymodal, Poorly Sorted	Polymodal, Poorly Sorted	Polymodal, Poorly Sorted	Polymodal, Moderately Sorted	Polymodal, Moderately Sorted	Polymodal, Poorly Sorted	Polymodal, Poorly Sorted	Polymodal, Poorly Sorted	Trimodal, Moderately Sorted	Trimodal, Moderately Sorted	Trimodal, Moderately Sorted	Polymodal, Moderately Sorted	Polymodal, Moderately Sorted	Polymodal, Poorly Sorted	Polymodal, Moderately Sorted	Polymodal, Poorly Sorted	Polymodal, Poorly Sorted	Polymodal, Moderately Sorted	Polymodal, Moderately Sorted	Polymodal, Poorly Sorted	Polymodal, Poorly Sorted
	TEXTURAL GROUP:	Sand	Sand	Sand	Sand	Sand	Sand	Sand	Sand	Sand	Sand	Sand	Sand	Sand	Sand	Sand	Sand	Sand	Sand	Sand	Sand	Sand	Sand	Sand	Sand	Sand
	SEDIMENT NAME:	Moderately Sorted Very Coarse Sand	Moderately Well Sorted Very Coarse Sand	Moderately Sorted Very Coarse Sand	Moderately Sorted Very Coarse Sand	Poorly Sorted Medium Sand	Poorly Sorted Medium Sand	Poorly Sorted Medium Sand	Moderately Sorted Medium Sand	Moderately Sorted Medium Sand	Poorly Sorted Medium Sand	Poorly Sorted Medium Sand	Poorly Sorted Medium Sand	Moderately Sorted Coarse Sand	Moderately Sorted Coarse Sand	Moderately Sorted Very Coarse Sand	Moderately Sorted Coarse Sand	Moderately Sorted Medium Sand	Poorly Sorted Medium Sand	Moderately Sorted Medium Sand	Poorly Sorted Medium Sand	Poorly Sorted Medium Sand	Moderately Sorted Coarse Sand	Moderately Sorted Medium Sand	Poorly Sorted Medium Sand	Poorly Sorted Medium Sand
METHOD OF	MEAN	807.473	851.744	657.954	758.646	518.713	472.045	433.333	331.181	335.379	368.743	349.9	414.483	660.335	608.681	719.46	589.875	442.675	472.993	446.477	472.381	488.359	513.108	460.105	445.955	457.559
MOMENTS	SORTING	352.06	339.159	359.91	350.842	354.049	331.801	320.072	262.91	281.258	309.875	278.1	334.399	312.397	317.058	343.595	324.239	296.405	320.844	301.114	319.889	322.705	331.746	301.877	323.331	328.187
Arithmetic (mm)	SKEWNESS	-0.620394	-0.886918	0.127862	-0.327198	0.650049	0.896382	1.07193	1.86134	1.7553	1.49631	1.52821	1.12236	0.387898	0.484956	-0.0762049	0.525691	1.10983	0.912799	1.07079	0.904584	0.859399	0.739521	1.03565	1.01318	0.959853
	KURTOSIS	1.71824	2.1138	1.43161	1.51101	1.99321	2.52649	2.9842	5.80485	5.15729	3.98865	4.65586	2.92948	1.66466	1.9572	1.43851	1.95473	3.29718	2.66838	3.17902	2.68802	2.54025	2.27275	3.06317	2.82712	2.66915
METHOD OF	MEAN	691.044	742.063	541.158	646.319	394.259	362.438	327.938	259.26	253.945	273.808	263.527	301.442	583.214	520.4	616.702	496.322	354.595	369.955	354.457	367.694	386.198	405.93	370.566	340.286	350.667
MOMENTS	SORTING	1.87711	1.82173	1.9501	1.87053	2.19576	2.12254	2.15556	1.95996	2.0558	2.12607	2.12737	2.23764	1.65351	1.78861	1.81551	1.8387	1.9606	2.06652	2.00294	2.10061	2.03035	2.04528	1.94653	2.12527	2.10614
Geometric (mm)	SKEWNESS	-1.27007	-1.5062	-0.575071	-1.06449	-0.441849	-0.251572	-0.203167	0.315401	0.294154	0.225068	-0.0133604	0.0421669	-0.159159	-0.468349	-0.786853	-0.387371	-0.0820175	-0.287654	-0.206324	-0.424071	-0.276308	-0.379983	-0.094474	-0.156171	-0.0962836
	KURTOSIS	3.8425	4.501	2.42149	3.45134	2.76757	2.65062	2.73157	3.15112	3.00241	2.8326	2.81474	2.34162	1.88803	2.74337	2.86968	2.56149	2.50083	2.73863	2.77161	3.06197	2.6686	2.78775	2.44629	2.56387	2.33887
METHOD OF	MEAN	0.53315	0.430386	0.885879	0.629683	1.34278	1.46419	1.6085	1.94753	1.97741	1.86876	1.92398	1.73005	0.777902	0.942306	0.697354	1.01065	1.49576	1.43458	1.49632	1.44342	1.37259	1.3007	1.4322	1.55518	1.51183
MOMENTS	SORTING	0.908516	0.865309	0.963549	0.903448	1.13472	1.08579	1.10806	0.970826	1.0397	1.08819	1.08907	1.16198	0.725529	0.838841	0.860376	0.87869	0.971294	1.0472	1.00212	1.07081	1.02173	1.0323	0.960903	1.08765	1.0746
Logarithmic (f)	SKEWNESS	1.27007	1.5062	0.575071	1.06449	0.441849	0.251572	0.203167	-0.315401	-0.294154	-0.225068	0.0133604	-0.0421669	0.159159	0.468349	0.786853	0.387371	0.0820175	0.287654	0.206324	0.424071	0.276308	0.379983	0.094474	0.156171	0.0962836
	KURTOSIS	3.8425	4.501	2.42149	3.45134	2.76757	2.65062	2.73157	3.15112	3.00241	2.8326	2.81474	2.34162	1.88803	2.74337	2.86968	2.56149	2.50083	2.73863	2.77161	3.06197	2.6686	2.78775	2.44629	2.56387	2.33887
FOLK AND	MEAN	693.699	838.172	547.376	684.099	427.125	350.464	287.242	269.388	268.698	275.235	272.06	334.201	556.76	541.519	566.98	535.164	292.73	352.219	292.955	352.296	423.607	510.699	296.653	343.432	346.181
WARD METHOD	SORTING	1.77425	1.54579	1.96045	1.92282	2.28605	2.27429	2.00472	1.95855	1.97846	2.00205	2.16302	2.30419	1.74997	1.91654	1.77221	1.93552	1.96521	2.25591	1.97076	2.25629	2.24656	1.97915	1.95912	2.2751	2.2769
(mm)	SKEWNESS	-0.846865	-0.819304	-0.176732	-0.84581	-0.255734	0.251794	0.130476	0.159367	0.169648	0.173723	0.0225705	0.279449	-0.0161069	-0.145954	-0.070244	-0.145925	0.12321	0.245544	0.119669	0.241649	-0.256236	-0.131006	0.121019	0.256086	0.254763
	KURTOSIS	0.852649	0.882866	0.660101	1.13557	1.08413	1.10366	1.10804	1.17956	1.16849	0.694355	0.844326	0.661055	0.847351	0.673914	0.837202	0.67236	1.13046	1.11626	1.12867	1.12187	1.11741	1.11367	1.12975	1.09912	1.09336
FOLK AND	MEAN	0.527618	0.254681	0.869395	0.547724	1.22727	1.51266	1.79966	1.89224	1.89595	1.86126	1.878	1.58121	0.844873	0.884916	0.81863	0.901948	1.77236	1.50546	1.77125	1.50514	1.2392	0.969456	1.75315	1.5419	1.5304
WARD METHOD	SORTING	0.827213	0.628346	0.971188	0.943221	1.19286	1.18541	1.0034	0.969788	0.98438	1.00148	1.11305	1.20426	0.807334	0.938502	0.82555	0.952719	0.97468	1.17371	0.97875	1.17395	1.16772	0.984883	0.970209	1.18593	1.18707
(f)	SKEWNESS	0.846865	0.819304	0.176732	0.84581	0.255734	-0.251794	-0.130476	-0.159367	-0.169648	-0.173723	-0.0225705	-0.279449	0.0161069	0.145954	0.070244	0.145925	-0.12321	-0.245544	-0.119669	-0.241649	0.256236	0.131006	-0.121019	-0.256086	-0.254763
	KURTOSIS	0.852649	0.882866	0.660101	1.13557	1.08413	1.10366	1.10804	1.17956	1.16849	0.694355	0.844326	0.661055	0.847351	0.673914	0.837202	0.67236	1.13046	1.11626	1.12867	1.12187	1.11741	1.11367	1.12975	1.09912	1.09336
FOLK AND	MEAN:	Coarse Sand	Coarse Sand	Coarse Sand	Coarse Sand	Medium Sand	Medium Sand	Medium Sand	Medium Sand	Medium Sand	Medium Sand	Medium Sand	Medium Sand	Coarse Sand	Coarse Sand	Coarse Sand	Coarse Sand	Medium Sand	Medium Sand	Medium Sand	Medium Sand	Medium Sand	Coarse Sand	Medium Sand	Medium Sand	Medium Sand
WARD METHOD	SORTING:	Moderately Sorted	Moderately Well Sorted	Moderately Sorted	Moderately Sorted	Poorly Sorted	Poorly Sorted	Poorly Sorted	Moderately Sorted	Moderately Sorted	Poorly Sorted	Poorly Sorted	Poorly Sorted	Moderately Sorted	Moderately Sorted	Moderately Sorted	Moderately Sorted	Moderately Sorted	Poorly Sorted	Moderately Sorted	Poorly Sorted	Poorly Sorted	Moderately Sorted	Moderately Sorted	Poorly Sorted	Poorly Sorted
(Description)	SKEWNESS:	Very Fine Skewed	Very Fine Skewed	Fine Skewed	Very Fine Skewed	Fine Skewed	Coarse Skewed	Coarse Skewed	Coarse Skewed	Coarse Skewed	Coarse Skewed	Symmetrical	Coarse Skewed	Symmetrical	Fine Skewed	Symmetrical	Fine Skewed	Coarse Skewed	Coarse Skewed	Coarse Skewed	Coarse Skewed	Fine Skewed	Fine Skewed	Coarse Skewed	Coarse Skewed	Coarse Skewed
	KURTOSIS:	Platykurtic	Platykurtic	Very Platykurtic	Leptokurtic	Mesokurtic	Mesokurtic	Mesokurtic	Leptokurtic	Leptokurtic	Platykurtic	Platykurtic	Very Platykurtic	Platykurtic	Platykurtic	Platykurtic	Platykurtic	Leptokurtic	Leptokurtic	Leptokurtic	Leptokurtic	Leptokurtic	Leptokurtic	Leptokurtic	Mesokurtic	Mesokurtic
	MODE 1 (mm):	1090	1090	1090	1090	275	275	275	275	275	275	275	275	550	550	1090	550	275	275	275	275	275	550	275	275	275
	MODE 2 (mm):	550	550	550	550	550	550	550	137.5	137.5	137.5	137.5	137.5	1090	1090	550	1090	550	550	550	550	550	275	550	550	550
	MODE 3 (mm):	275	275	275	275	1090	1090	137.5	550	550	1090	550	550	275	275	275	275	137.5	1090	137.5	1090	1090	1090	137.5	137.5	137.5
	MODE 1 (f):	-0.119393	-0.119393	-0.119393	-0.119393	1.86848	1.86848	1.86848	1.86848	1.86848	1.86848	1.86848	1.86848	0.868483	0.868483	-0.119393	0.868483	1.86848	1.86848	1.86848	1.86848	1.86848	0.868483	1.86848	1.86848	1.86848
	MODE 2 (f):	0.868483	0.868483	0.868483	0.868483	0.868483	0.868483	0.868483	2.86848	2.86848	2.86848	2.86848	2.86848	-0.119393	-0.119393	0.868483	-0.119393	0.868483	0.868483	0.868483	0.868483	0.868483	1.86848	0.868483	0.868483	0.868483
	MODE 3 (f):	1.86848	1.86848	1.86848	1.86848	-0.119393	-0.119393	2.86848	0.868483	0.868483	-0.119393	0.868483	0.868483	1.86848	1.86848	1.86848	1.86848	2.86848	-0.119393	2.86848	-0.119393	-0.119393	-0.119393	2.86848	2.86848	2.86848
	D10 (mm):	267.112	273.704	254.753	264.843	135.592	134.584	131.775	130.05	128.708	129.537	127.993	129.341	271.208	259.702	266.046	256.076	136.609	136.026	136.035	135.6	138.12	139.651	138.417	132.908	133.644
	D50 (mm):	1024.66	1039.16	558.594	1000.51	505.232	293.958	285.806	266.873	264.563	269.038	269.172	276.671	558.122	545.907	579.759	539.155	292.257	297.135	292.903	297.697	501.575	510.744	296.064	288.672	290.834
	D90 (mm):	1147.15	1150.38	1129.46	1141.7	1101.4	1079.31	1059.84	585.943	596.983	1039.55	593.843	1066.38	1120.22	1108.81	1135.85	1106.89	1041.63	1071.92	1047.16	1070.56	1078	1089.88	1053.67	1065.94	1072.86
	(D90 / D10) (mm):	4.29465	4.20301	4.43356	4.31083	8.12288	8.01961	8.04278	4.50551	4.63827	8.0251	4.63965	8.24477	4.13048	4.26957	4.26936	4.32249	7.62492	7.88022	7.6977	7.89499	7.80485	7.80432	7.61227	8.02009	8.02768
	(D90 - D10) (mm):	880.041	876.677	874.711	876.852	965.807	944.724	928.061	455.892	468.275	910.012	465.85	937.042	849.011	849.113	869.801	850.81	905.025	935.891	911.121	934.96	939.884	950.232	915.251	933.027	939.211
	(D75 / D25) (mm):	2.09305	2.0301	3.69657	2.10545	2.2889	2.24503	2.24106	2.09721	2.13092	3.61241	3.71878	3.89323	2.05093	3.45418	2.10716	3.54166	2.1766	2.21623	2.18532	2.21209	2.20822	2.21519	2.1756	2.2507	2.2588
	(D75 - D25) (mm):	574.237	561.881	771.562	570.488	335.662	318.948	310.28	155.523	157.996	370.369	381.051	412.189	530.955	717.605	563.624	721.679	303.085	314.579	305.12	313.948	316.101	321.658	306.04	314.209	317.703
	D10 (f):	-0.198058	-0.202112	-0.175638	-0.191177	-0.139338	-0.110106	-0.0838405	0.771169	0.744239	-0.0559584	0.751847	-0.0927258	-0.16378	-0.149018	-0.183769	-0.146506	-0.058849	-0.100193	-0.0664757	-0.098365	-0.108363	-0.124174	-0.0754207	-0.09212	-0.101455
	D50 (f):	-0.0351431	-0.055415	0.840129	-0.000739278	0.984981	1.76632	1.80689	1.90578	1.91832	1.89412	1.8934	1.85376	0.841348	0.873273	0.786476	0.891228	1.77469	1.75081	1.7715	1.74808	0.995462	0.969327	1.75602	1.7925	1.78173
	D90 (f):	1.90448	1.86931	1.97283	1.91679	2.88265	2.89343	2.92385	2.94286	2.95783	2.94856	2.96586	2.95075	1.88253	1.94507	1.91025	1.96536	2.87187	2.87804	2.87795	2.88257	2.85601	2.8401	2.85291	2.9115	2.90353
	(D90 / D10) (f):	-9.61578	-9.24886	-11.2323	-10.0262	-20.6883	-26.2786	-34.874	3.8161	3.9743	-52.692	3.94477	-31.8223	-11.4942	-13.0526	-10.3949	-13.4149	-48.8007	-28.725	-43.2933	-29.3049	-26.356	-22.872	-37.8266	-31.6055	-28.6188
	(D90 - D10) (f):	2.10254	2.07142	2.14847	2.10797	3.02199	3.00353	3.00769	2.17169	2.21359	3.00452	2.21401	3.04348	2.04631	2.09409	2.09402	2.11186	2.93072	2.97824	2.94443	2.98094	2.96437	2.96427	2.92833	3.00362	3.00498
	(D75 / D25) (f):	-6.78015	-5.94457	-22.3106	-7.96877	2.60054	2.46198	2.39298	1.6105	1.62439	2.9194	3.01562	3.30611	-19.212	-123.492	-9.62111	-224.671	2.3442	2.43011	2.35888	2.42554	2.44387	2.48987	2.36726	2.42283	2.44998
	(D75 - D25) (f):	1.06561	1.02155	1.88619	1.07413	1.19465	1.16673	1.16418	1.06847	1.09147	1.85296	1.89483	1.96097	1.03628	1.78834	1.0753	1.82443	1.12207	1.14811	1.12784	1.14541	1.14289	1.14743	1.12141	1.17037	1.17555
	% GRAVEL:	0	0	0	0	0	0	0	0	0	0	0	0	0	0	0	0	0	0	0	0	0	0	0	0	0
	% SAND:	0.999418	0.999687	0.99953	0.999357	0.98857	0.991458	0.986884	0.991825	0.988626	0.986842	0.982372	0.989427	1	1	1	0.999649	0.997887	0.992869	0.994038	0.987437	0.994934	0.993914	0.998333	0.991145	0.995528
	% MUD:	0.000582255	0.000313421	0.000469539	0.000642536	0.0114296	0.00854153	0.0131157	0.00817466	0.0113738	0.0131579	0.0176282	0.0105728	0	0	0	0.000351481	0.00211342	0.00713062	0.00596187	0.0125631	0.00506558	0.00608648	0.00166667	0.00885499	0.0044722
	% V COARSE GRAVEL:	0	0	0	0	0	0	0	0	0	0	0	0	0	0	0	0	0	0	0	0	0	0	0	0	0
	% COARSE GRAVEL:	0	0	0	0	0	0	0	0	0	0	0	0	0	0	0	0	0	0	0	0	0	0	0	0	0
	% MEDIUM GRAVEL:	0	0	0	0	0	0	0	0	0	0	0	0	0	0	0	0	0	0	0	0	0	0	0	0	0
	% FINE GRAVEL:	0	0	0	0	0	0	0	0	0	0	0	0	0	0	0	0	0	0	0	0	0	0	0	0	0
	% V FINE GRAVEL:	0	0	0	0	0	0	0	0	0	0	0	0	0	0	0	0	0	0	0	0	0	0	0	0	0
	% V COARSE SAND:	0.586286	0.6511	0.378135	0.501553	0.240109	0.185565	0.154109	0.0807497	0.0961973	0.130607	0.088141	0.163484	0.318355	0.266002	0.434015	0.258761	0.132705	0.172292	0.138579	0.17005	0.183085	0.208342	0.146167	0.162809	0.173876
	% COARSE SAND:	0.224661	0.189212	0.310717	0.3006	0.275629	0.277457	0.255328	0.148041	0.137513	0.137485	0.209615	0.200726	0.45773	0.45155	0.35056	0.411339	0.315516	0.310413	0.315078	0.316109	0.322479	0.330159	0.328167	0.267929	0.271416
	% MEDIUM SAND:	0.139831	0.11863	0.235474	0.143125	0.301917	0.33134	0.340652	0.42259	0.386228	0.388158	0.340064	0.305823	0.223915	0.230605	0.175207	0.264771	0.361043	0.32861	0.352929	0.327449	0.325599	0.308002	0.354333	0.328073	0.321459
	% FINE SAND:	0.0442066	0.0369836	0.0719959	0.0512422	0.148672	0.177593	0.210992	0.317615	0.333539	0.303005	0.301282	0.282941	0	0.0495201	0.0382248	0.0627043	0.176911	0.165347	0.174281	0.156066	0.152103	0.136442	0.161833	0.212783	0.210425
	% V FINE SAND:	0.00443409	0.00376105	0.00320851	0.00283787	0.0222437	0.0195032	0.0258037	0.0228292	0.035149	0.0275867	0.0432692	0.0364526	0	0.00232316	0.00199332	0.00207374	0.0117119	0.016206	0.0131716	0.0177631	0.0116689	0.0109688	0.00783333	0.0195511	0.0183515
	% V COARSE SILT:	0.000582255	0.000313421	0.000469539	0.000642536	0.0114296	0.00854153	0.0131157	0.00817466	0.0113738	0.0131579	0.0176282	0.0105728	0	0	0	0.000351481	0.00211342	0.00713062	0.00596187	0.0125631	0.00506558	0.00608648	0.00166667	0.00885499	0.0044722
	% COARSE SILT:	0	0	0	0	0	0	0	0	0	0	0	0	0	0	0	0	0	0	0	0	0	0	0	0	0
	% MEDIUM SILT:	0	0	0	0	0	0	0	0	0	0	0	0	0	0	0	0	0	0	0	0	0	0	0	0	0
	% FINE SILT:	0	0	0	0	0	0	0	0	0	0	0	0	0	0	0	0	0	0	0	0	0	0	0	0	0
	% V FINE SILT:	0	0	0	0	0	0	0	0	0	0	0	0	0	0	0	0	0	0	0	0	0	0	0	0	0
	% CLAY:	0	0	0	0	0	0	0	0	0	0	0	0	0	0	0	0	0	0	0	0	0	0	0	0	0

## Sheet: Turbidity
	EVES GARDEN											SIWA
		Ext temperature		Turbidity				Battery					Ext temperature		Turbidity				Battery
UNITS	[dd/MM/yyyy HH:mm:ss]	Raw	°C	Raw	FTU	Gain	Status	Raw	V		UNITS	[dd/MM/yyyy HH:mm:ss]	Raw	°C	Raw	FTU	Gain	Status	Raw	V
BURSTSTART	2016-09-22 11:20:04	20158	30.0598	3394	1.11351	100	OK	24660	10.7846		BURSTSTART	2016-09-22 11:23:04	20002	30.3523	6279	2.18926	100	OK	24626	10.7517
BURSTSTART	2016-09-22 11:25:04	20150	30.0732	10740	3.91579	100	OK	24665	10.7867		BURSTSTART	2016-09-22 11:28:04	20002	30.3523	4794	1.62277	100	OK	24626	10.7517
BURSTSTART	2016-09-22 11:30:04	20145	30.0816	5846	2.04887	100	OK	24667	10.7875		BURSTSTART	2016-09-22 11:33:04	20002	30.3523	4513	1.51558	100	OK	24625	10.7513
BURSTSTART	2016-09-22 11:35:04	20143	30.0849	2328	0.706864	100	OK	24672	10.7896		BURSTSTART	2016-09-22 11:38:04	20001	30.3539	4943	1.67961	100	OK	24625	10.7513
BURSTSTART	2016-09-22 11:40:04	20139	30.0916	3501	1.15433	100	OK	24674	10.7905		BURSTSTART	2016-09-22 11:43:04	19997	30.3607	9351	3.36113	100	OK	24625	10.7513
BURSTSTART	2016-09-22 11:45:04	20142	30.0866	2525	0.782013	100	OK	24674	10.7905		BURSTSTART	2016-09-22 11:48:04	19997	30.3607	18608	6.8924	100	OK	24625	10.7513
BURSTSTART	2016-09-22 11:50:04	20137	30.095	2703	0.849915	100	OK	24676	10.7913		BURSTSTART	2016-09-22 11:53:04	19994	30.3657	4846	1.64261	100	OK	24624	10.7508
BURSTSTART	2016-09-22 11:55:04	20138	30.0933	2079	0.611878	100	OK	24677	10.7917		BURSTSTART	2016-09-22 11:58:04	19990	30.3725	4604	1.55029	100	OK	24623	10.7504
BURSTSTART	2016-09-22 12:00:04	20136	30.0967	2140	0.635148	100	OK	24678	10.7922		BURSTSTART	2016-09-22 12:03:04	19986	30.3792	5010	1.70517	100	OK	24622	10.75
BURSTSTART	2016-09-22 12:05:04	20135	30.0984	1862	0.529099	100	OK	24680	10.793		BURSTSTART	2016-09-22 12:08:04	19985	30.3809	5841	2.02217	100	OK	24622	10.75
BURSTSTART	2016-09-22 12:10:04	20137	30.095	1996	0.580216	100	OK	24679	10.7926		BURSTSTART	2016-09-22 12:13:04	19987	30.3775	4858	1.64719	100	OK	24623	10.7504
BURSTSTART	2016-09-22 12:15:04	20134	30.1	2367	0.721741	100	OK	24678	10.7922		BURSTSTART	2016-09-22 12:18:04	19984	30.3826	5520	1.89972	100	OK	24622	10.75
BURSTSTART	2016-09-22 12:20:04	20139	30.0916	1687	0.462342	100	OK	24680	10.793		BURSTSTART	2016-09-22 12:23:04	19983	30.3843	4028	1.33057	100	OK	24624	10.7508
BURSTSTART	2016-09-22 12:25:04	20135	30.0984	2099	0.619507	100	OK	24681	10.7934		BURSTSTART	2016-09-22 12:28:04	19984	30.3826	4159	1.38054	100	OK	24623	10.7504
BURSTSTART	2016-09-22 12:30:04	20137	30.095	1960	0.566483	100	OK	24682	10.7939		BURSTSTART	2016-09-22 12:33:04	19985	30.3809	4737	1.60103	100	OK	24620	10.7492
BURSTSTART	2016-09-22 12:35:04	20135	30.0984	1852	0.525284	100	OK	24682	10.7939		BURSTSTART	2016-09-22 12:38:04	19985	30.3809	4384	1.46637	100	OK	24621	10.7496
BURSTSTART	2016-09-22 12:40:04	20136	30.0967	1725	0.476837	100	OK	24682	10.7939		BURSTSTART	2016-09-22 12:43:04	19987	30.3775	4946	1.68076	100	OK	24621	10.7496
BURSTSTART	2016-09-22 12:45:04	20136	30.0967	1760	0.490189	100	OK	24681	10.7934		BURSTSTART	2016-09-22 12:48:04	19984	30.3826	3959	1.30425	100	OK	24622	10.75
BURSTSTART	2016-09-22 12:50:04	20135	30.0984	1739	0.482178	100	OK	24679	10.7926		BURSTSTART	2016-09-22 12:53:04	19983	30.3843	4012	1.32446	100	OK	24621	10.7496
BURSTSTART	2016-09-22 12:55:04	20134	30.1	1792	0.502396	100	OK	24679	10.7926		BURSTSTART	2016-09-22 12:58:04	19978	30.3927	3563	1.15318	100	OK	24618	10.7483
BURSTSTART	2016-09-22 13:00:04	20133	30.1017	1871	0.532532	100	OK	24681	10.7934		BURSTSTART	2016-09-22 13:03:04	19979	30.391	5717	1.97487	100	OK	24620	10.7492
BURSTSTART	2016-09-22 13:05:04	20130	30.1068	1808	0.508499	100	OK	24681	10.7934		BURSTSTART	2016-09-22 13:08:04	19976	30.396	4629	1.55983	100	OK	24620	10.7492
BURSTSTART	2016-09-22 13:10:04	20127	30.1118	1722	0.475693	100	OK	24682	10.7939		BURSTSTART	2016-09-22 13:13:04	19975	30.3977	4796	1.62354	100	OK	24618	10.7483
BURSTSTART	2016-09-22 13:15:04	20124	30.1168	1507	0.393677	100	OK	24682	10.7939		BURSTSTART	2016-09-22 13:18:04	19976	30.396	3936	1.29547	100	OK	24621	10.7496
BURSTSTART	2016-09-22 13:20:04	20121	30.1219	1678	0.458908	100	OK	24682	10.7939		BURSTSTART	2016-09-22 13:23:04	19975	30.3977	3193	1.01204	100	OK	24619	10.7488
BURSTSTART	2016-09-22 13:25:04	20120	30.1235	2388	0.729752	100	OK	24684	10.7947		BURSTSTART	2016-09-22 13:28:04	19974	30.3994	3601	1.16768	100	OK	24617	10.7479
BURSTSTART	2016-09-22 13:30:04	20116	30.1303	1938	0.558091	100	OK	24683	10.7943		BURSTSTART	2016-09-22 13:33:04	19976	30.396	4374	1.46256	100	OK	24619	10.7488
BURSTSTART	2016-09-22 13:35:04	20115	30.1319	2246	0.675583	100	OK	24683	10.7943		BURSTSTART	2016-09-22 13:38:04	19979	30.391	4819	1.63231	100	OK	24619	10.7488
BURSTSTART	2016-09-22 13:40:04	20111	30.1387	1979	0.573731	100	OK	24685	10.7951		BURSTSTART	2016-09-22 13:43:04	19980	30.3893	3261	1.03798	100	OK	24617	10.7479
BURSTSTART	2016-09-22 13:45:04	20108	30.1437	1976	0.572586	100	OK	24683	10.7943		BURSTSTART	2016-09-22 13:48:04	19981	30.3876	5070	1.72806	100	OK	24618	10.7483
BURSTSTART	2016-09-22 13:50:04	20105	30.1487	1698	0.466538	100	OK	24684	10.7947		BURSTSTART	2016-09-22 13:53:04	19982	30.3859	4022	1.32828	100	OK	24616	10.7475
BURSTSTART	2016-09-22 13:55:04	20101	30.1554	2007	0.584412	100	OK	24684	10.7947		BURSTSTART	2016-09-22 13:58:04	19984	30.3826	3632	1.17951	100	OK	24618	10.7483
BURSTSTART	2016-09-22 14:00:04	20092	30.1706	2166	0.645066	100	OK	24685	10.7951		BURSTSTART	2016-09-22 14:03:04	19983	30.3843	4009	1.32332	100	OK	24618	10.7483
BURSTSTART	2016-09-22 14:05:04	20091	30.1723	1561	0.414276	100	OK	24686	10.7955		BURSTSTART	2016-09-22 14:08:04	19982	30.3859	5022	1.70975	100	OK	24616	10.7475
BURSTSTART	2016-09-22 14:10:04	20088	30.1773	1665	0.453949	100	OK	24686	10.7955		BURSTSTART	2016-09-22 14:13:04	19982	30.3859	3362	1.07651	100	OK	24618	10.7483
BURSTSTART	2016-09-22 14:15:04	20078	30.1941	1898	0.542832	100	OK	24686	10.7955		BURSTSTART	2016-09-22 14:18:04	19985	30.3809	4396	1.47095	100	OK	24615	10.7471
BURSTSTART	2016-09-22 14:20:04	20064	30.2176	1743	0.483704	100	OK	24687	10.796		BURSTSTART	2016-09-22 14:23:04	19983	30.3843	3610	1.17111	100	OK	24614	10.7467
BURSTSTART	2016-09-22 14:25:04	20059	30.2261	2113	0.624848	100	OK	24690	10.7972		BURSTSTART	2016-09-22 14:28:04	19983	30.3843	3377	1.08223	100	OK	24616	10.7475
BURSTSTART	2016-09-22 14:30:04	20057	30.2294	1977	0.572968	100	OK	24690	10.7972		BURSTSTART	2016-09-22 14:33:04	19986	30.3792	4173	1.38588	100	OK	24616	10.7475
BURSTSTART	2016-09-22 14:35:04	20056	30.2311	1803	0.506592	100	OK	24690	10.7972		BURSTSTART	2016-09-22 14:38:04	19987	30.3775	3921	1.28975	100	OK	24616	10.7475
BURSTSTART	2016-09-22 14:40:04	20056	30.2311	1749	0.485993	100	OK	24689	10.7968		BURSTSTART	2016-09-22 14:43:04	19990	30.3725	4156	1.37939	100	OK	24615	10.7471
BURSTSTART	2016-09-22 14:45:04	20057	30.2294	1496	0.389481	100	OK	24691	10.7976		BURSTSTART	2016-09-22 14:48:04	19993	30.3674	5417	1.86043	100	OK	24615	10.7471
BURSTSTART	2016-09-22 14:50:04	20060	30.2244	1383	0.346375	100	OK	24689	10.7968		BURSTSTART	2016-09-22 14:53:04	19996	30.3624	3475	1.11961	100	OK	24615	10.7471
BURSTSTART	2016-09-22 14:55:04	20060	30.2244	1297	0.313568	100	OK	24690	10.7972		BURSTSTART	2016-09-22 14:58:04	19998	30.359	4345	1.45149	100	OK	24616	10.7475
BURSTSTART	2016-09-22 15:00:04	20067	30.2126	1446	0.370407	100	OK	24689	10.7968		BURSTSTART	2016-09-22 15:03:04	19998	30.359	4542	1.52664	100	OK	24613	10.7462
BURSTSTART	2016-09-22 15:05:04	20067	30.2126	1398	0.352097	100	OK	24689	10.7968		BURSTSTART	2016-09-22 15:08:04	19998	30.359	6598	2.31094	100	OK	24613	10.7462
BURSTSTART	2016-09-22 15:10:04	20075	30.1991	1338	0.329209	100	OK	24690	10.7972		BURSTSTART	2016-09-22 15:13:04	20002	30.3523	7103	2.50359	100	OK	24614	10.7467
BURSTSTART	2016-09-22 15:15:04	20080	30.1907	2173	0.647736	100	OK	24688	10.7964		BURSTSTART	2016-09-22 15:18:04	20003	30.3506	4597	1.54762	100	OK	24612	10.7458
BURSTSTART	2016-09-22 15:20:04	20082	30.1874	1528	0.401688	100	OK	24689	10.7968		BURSTSTART	2016-09-22 15:23:04	20005	30.3472	6951	2.4456	100	OK	24612	10.7458
BURSTSTART	2016-09-22 15:25:04	20087	30.179	2009	0.585175	100	OK	24689	10.7968		BURSTSTART	2016-09-22 15:28:04	20005	30.3472	26003	9.71337	100	OK	24611	10.7454
BURSTSTART	2016-09-22 15:30:04	20089	30.1756	1608	0.432206	100	OK	24689	10.7968		BURSTSTART	2016-09-22 15:33:04	20007	30.3438	4966	1.68839	100	OK	24612	10.7458
BURSTSTART	2016-09-22 15:35:04	20094	30.1672	1416	0.358963	100	OK	24688	10.7964		BURSTSTART	2016-09-22 15:38:04	20009	30.3405	4489	1.50642	100	OK	24612	10.7458
BURSTSTART	2016-09-22 15:40:04	20094	30.1672	1445	0.370026	100	OK	24687	10.796		BURSTSTART	2016-09-22 15:43:04	20011	30.3371	4400	1.47247	100	OK	24613	10.7462
BURSTSTART	2016-09-22 15:45:04	20097	30.1622	1927	0.553894	100	OK	24689	10.7968		BURSTSTART	2016-09-22 15:48:04	20011	30.3371	4673	1.57662	100	OK	24612	10.7458
BURSTSTART	2016-09-22 15:50:04	20098	30.1605	1453	0.373078	100	OK	24688	10.7964		BURSTSTART	2016-09-22 15:53:04	20012	30.3354	6442	2.25144	100	OK	24612	10.7458
BURSTSTART	2016-09-22 15:55:04	20101	30.1554	1766	0.492478	100	OK	24687	10.796		BURSTSTART	2016-09-22 15:58:04	20012	30.3354	5256	1.79901	100	OK	24611	10.7454
BURSTSTART	2016-09-22 16:00:04	20107	30.1454	1894	0.541306	100	OK	24687	10.796		BURSTSTART	2016-09-22 16:03:04	20013	30.3337	8858	3.17307	100	OK	24611	10.7454
BURSTSTART	2016-09-22 16:05:04	20108	30.1437	1467	0.378418	100	OK	24686	10.7955		BURSTSTART	2016-09-22 16:08:04	20013	30.3337	6077	2.1122	100	OK	24610	10.745
BURSTSTART	2016-09-22 16:10:04	20107	30.1454	1731	0.479126	100	OK	24688	10.7964		BURSTSTART	2016-09-22 16:13:04	20014	30.332	4547	1.52855	100	OK	24609	10.7446
BURSTSTART	2016-09-22 16:15:04	20108	30.1437	1767	0.492859	100	OK	24689	10.7968		BURSTSTART	2016-09-22 16:18:04	20016	30.3287	10709	3.87917	100	OK	24611	10.7454
BURSTSTART	2016-09-22 16:20:04	20114	30.1336	1354	0.335312	100	OK	24687	10.796		BURSTSTART	2016-09-22 16:23:04	20014	30.332	11523	4.18968	100	OK	24609	10.7446
BURSTSTART	2016-09-22 16:25:04	20117	30.1286	1642	0.445175	100	OK	24688	10.7964		BURSTSTART	2016-09-22 16:28:04	20019	30.3236	5781	1.99928	100	OK	24609	10.7446
BURSTSTART	2016-09-22 16:30:04	20119	30.1252	3700	1.23024	100	OK	24687	10.796		BURSTSTART	2016-09-22 16:33:04	20021	30.3203	6829	2.39906	100	OK	24609	10.7446
BURSTSTART	2016-09-22 16:35:04	20127	30.1118	1593	0.426483	100	OK	24688	10.7964		BURSTSTART	2016-09-22 16:38:04	20021	30.3203	4577	1.53999	100	OK	24608	10.7442
BURSTSTART	2016-09-22 16:40:04	20124	30.1168	1970	0.570298	100	OK	24689	10.7968		BURSTSTART	2016-09-22 16:43:04	20022	30.3186	5119	1.74675	100	OK	24609	10.7446
BURSTSTART	2016-09-22 16:45:04	20126	30.1135	2081	0.612641	100	OK	24687	10.796		BURSTSTART	2016-09-22 16:48:04	20023	30.3169	4869	1.65138	100	OK	24609	10.7446
BURSTSTART	2016-09-22 16:50:04	20126	30.1135	3981	1.33743	100	OK	24687	10.796		BURSTSTART	2016-09-22 16:53:04	20022	30.3186	5439	1.86882	100	OK	24607	10.7437
BURSTSTART	2016-09-22 16:55:04	20130	30.1068	1427	0.363159	100	OK	24688	10.7964		BURSTSTART	2016-09-22 16:58:04	20025	30.3135	6448	2.25373	100	OK	24607	10.7437
BURSTSTART	2016-09-22 17:00:04	20126	30.1135	2478	0.764084	100	OK	24687	10.796		BURSTSTART	2016-09-22 17:03:04	20026	30.3119	8396	2.99683	100	OK	24606	10.7433
BURSTSTART	2016-09-22 17:05:04	20133	30.1017	1322	0.323105	100	OK	24686	10.7955		BURSTSTART	2016-09-22 17:08:04	20029	30.3068	6195	2.15721	100	OK	24606	10.7433
BURSTSTART	2016-09-22 17:10:04	20134	30.1	1849	0.52414	100	OK	24686	10.7955		BURSTSTART	2016-09-22 17:13:04	20030	30.3051	7148	2.52075	100	OK	24606	10.7433
BURSTSTART	2016-09-22 17:15:04	20136	30.0967	3164	1.02577	100	OK	24686	10.7955		BURSTSTART	2016-09-22 17:18:04	20032	30.3018	6738	2.36435	100	OK	24605	10.7429
BURSTSTART	2016-09-22 17:20:04	20141	30.0883	1314	0.320053	100	OK	24686	10.7955		BURSTSTART	2016-09-22 17:23:04	20037	30.2934	5601	1.93062	100	OK	24606	10.7433
BURSTSTART	2016-09-22 17:25:04	20142	30.0866	1379	0.344849	100	OK	24687	10.796		BURSTSTART	2016-09-22 17:28:04	20033	30.3001	6429	2.24648	100	OK	24606	10.7433
BURSTSTART	2016-09-22 17:30:04	20141	30.0883	2034	0.594712	100	OK	24687	10.796		BURSTSTART	2016-09-22 17:33:04	20037	30.2934	4344	1.45111	100	OK	24606	10.7433
BURSTSTART	2016-09-22 17:35:04	20137	30.095	2970	0.951768	100	OK	24686	10.7955		BURSTSTART	2016-09-22 17:38:04	20039	30.29	5930	2.05612	100	OK	24604	10.7425
BURSTSTART	2016-09-22 17:40:04	20142	30.0866	1443	0.369263	100	OK	24686	10.7955		BURSTSTART	2016-09-22 17:43:04	20041	30.2866	5618	1.93711	100	OK	24605	10.7429
BURSTSTART	2016-09-22 17:45:04	20149	30.0749	1895	0.541687	100	OK	24685	10.7951		BURSTSTART	2016-09-22 17:48:04	20042	30.2849	5589	1.92604	100	OK	24605	10.7429
BURSTSTART	2016-09-22 17:50:04	20148	30.0766	1663	0.453186	100	OK	24686	10.7955		BURSTSTART	2016-09-22 17:53:04	20041	30.2866	26853	10.0376	100	OK	24602	10.7416
BURSTSTART	2016-09-22 17:55:04	20148	30.0766	1620	0.436783	100	OK	24684	10.7947		BURSTSTART	2016-09-22 17:58:04	20041	30.2866	5269	1.80397	100	OK	24604	10.7425
BURSTSTART	2016-09-22 18:00:04	20152	30.0698	1527	0.401306	100	OK	24685	10.7951		BURSTSTART	2016-09-22 18:03:04	20041	30.2866	6250	2.17819	100	OK	24602	10.7416
BURSTSTART	2016-09-22 18:05:04	20151	30.0715	1569	0.417328	100	OK	24685	10.7951		BURSTSTART	2016-09-22 18:08:04	20045	30.2799	10159	3.66936	100	OK	24605	10.7429
BURSTSTART	2016-09-22 18:10:04	20153	30.0682	1459	0.375366	100	OK	24688	10.7964		BURSTSTART	2016-09-22 18:13:04	20047	30.2765	4578	1.54038	100	OK	24602	10.7416
BURSTSTART	2016-09-22 18:15:04	20154	30.0665	1688	0.462723	100	OK	24686	10.7955		BURSTSTART	2016-09-22 18:18:04	20049	30.2732	6792	2.38495	100	OK	24603	10.7421
BURSTSTART	2016-09-22 18:20:04	20158	30.0598	1329	0.325775	100	OK	24687	10.796		BURSTSTART	2016-09-22 18:23:04	20046	30.2782	8023	2.85454	100	OK	24603	10.7421
BURSTSTART	2016-09-22 18:25:04	20160	30.0564	1291	0.31128	100	OK	24685	10.7951		BURSTSTART	2016-09-22 18:28:04	20049	30.2732	5987	2.07787	100	OK	24602	10.7416
BURSTSTART	2016-09-22 18:30:04	20161	30.0547	1771	0.494385	100	OK	24686	10.7955		BURSTSTART	2016-09-22 18:33:04	20051	30.2698	7274	2.56882	100	OK	24604	10.7425
BURSTSTART	2016-09-22 18:35:04	20162	30.0531	1472	0.380326	100	OK	24684	10.7947		BURSTSTART	2016-09-22 18:38:04	20050	30.2715	7037	2.47841	100	OK	24602	10.7416
BURSTSTART	2016-09-22 18:40:04	20161	30.0547	1414	0.3582	100	OK	24688	10.7964		BURSTSTART	2016-09-22 18:43:04	20059	30.2564	5177	1.76888	100	OK	24602	10.7416
BURSTSTART	2016-09-22 18:45:04	20160	30.0564	1409	0.356293	100	OK	24686	10.7955		BURSTSTART	2016-09-22 18:48:04	20056	30.2614	5242	1.79367	100	OK	24601	10.7412
BURSTSTART	2016-09-22 18:50:04	20162	30.0531	1472	0.380326	100	OK	24688	10.7964		BURSTSTART	2016-09-22 18:53:04	20060	30.2547	5058	1.72348	100	OK	24602	10.7416
BURSTSTART	2016-09-22 18:55:04	20163	30.0514	1700	0.467301	100	OK	24686	10.7955		BURSTSTART	2016-09-22 18:58:04	20064	30.248	7120	2.51007	100	OK	24599	10.7404
BURSTSTART	2016-09-22 19:00:04	20169	30.0413	2332	0.70839	100	OK	24687	10.796		BURSTSTART	2016-09-22 19:03:04	20063	30.2496	7130	2.51389	100	OK	24601	10.7412
BURSTSTART	2016-09-22 19:05:04	20173	30.0346	2106	0.622178	100	OK	24686	10.7955		BURSTSTART	2016-09-22 19:08:04	20063	30.2496	8152	2.90375	100	OK	24599	10.7404
BURSTSTART	2016-09-22 19:10:04	20172	30.0363	2097	0.618744	100	OK	24686	10.7955		BURSTSTART	2016-09-22 19:13:04	20061	30.253	7454	2.63748	100	OK	24599	10.7404
BURSTSTART	2016-09-22 19:15:04	20169	30.0413	1944	0.560379	100	OK	24686	10.7955		BURSTSTART	2016-09-22 19:18:04	20063	30.2496	5251	1.7971	100	OK	24598	10.74
BURSTSTART	2016-09-22 19:20:04	20176	30.0296	1663	0.453186	100	OK	24682	10.7939		BURSTSTART	2016-09-22 19:23:04	20067	30.2429	7426	2.6268	100	OK	24598	10.74
BURSTSTART	2016-09-22 19:25:04	20178	30.0263	1660	0.452042	100	OK	24686	10.7955		BURSTSTART	2016-09-22 19:28:04	20065	30.2463	19781	7.33986	100	OK	24597	10.7395
BURSTSTART	2016-09-22 19:30:04	20177	30.0279	1466	0.378037	100	OK	24684	10.7947		BURSTSTART	2016-09-22 19:33:04	20067	30.2429	5778	1.99814	100	OK	24597	10.7395
BURSTSTART	2016-09-22 19:35:04	20178	30.0263	1925	0.553131	100	OK	24683	10.7943		BURSTSTART	2016-09-22 19:38:04	20066	30.2446	7464	2.6413	100	OK	24602	10.7416
BURSTSTART	2016-09-22 19:40:04	20177	30.0279	1951	0.56305	100	OK	24684	10.7947		BURSTSTART	2016-09-22 19:43:04	20070	30.2379	6077	2.1122	100	OK	24599	10.7404
BURSTSTART	2016-09-22 19:45:04	20178	30.0263	1333	0.327301	100	OK	24682	10.7939		BURSTSTART	2016-09-22 19:48:04	20072	30.2345	6899	2.42577	100	OK	24602	10.7416
BURSTSTART	2016-09-22 19:50:04	20182	30.0196	1535	0.404358	100	OK	24682	10.7939		BURSTSTART	2016-09-22 19:53:04	20074	30.2312	9213	3.30849	100	OK	24596	10.7391
BURSTSTART	2016-09-22 19:55:04	20183	30.0179	1205	0.278473	100	OK	24684	10.7947		BURSTSTART	2016-09-22 19:58:04	20077	30.2261	5917	2.05116	100	OK	24596	10.7391
BURSTSTART	2016-09-22 20:00:04	20187	30.0112	1341	0.330353	100	OK	24682	10.7939		BURSTSTART	2016-09-22 20:03:04	20080	30.2211	6298	2.1965	100	OK	24596	10.7391
BURSTSTART	2016-09-22 20:05:04	20187	30.0112	1275	0.305176	100	OK	24683	10.7943		BURSTSTART	2016-09-22 20:08:04	20080	30.2211	5054	1.72196	100	OK	24600	10.7408
BURSTSTART	2016-09-22 20:10:04	20186	30.0129	1639	0.444031	100	OK	24681	10.7934		BURSTSTART	2016-09-22 20:13:04	20080	30.2211	5761	1.99165	100	OK	24597	10.7395
BURSTSTART	2016-09-22 20:15:04	20189	30.0078	1468	0.3788	100	OK	24679	10.7926		BURSTSTART	2016-09-22 20:18:04	20082	30.2177	7207	2.54326	100	OK	24600	10.7408
BURSTSTART	2016-09-22 20:20:04	20190	30.0062	1762	0.490952	100	OK	24681	10.7934		BURSTSTART	2016-09-22 20:23:04	20085	30.2127	6660	2.3346	100	OK	24598	10.74
BURSTSTART	2016-09-22 20:25:04	20193	30.0011	1655	0.450135	100	OK	24681	10.7934		BURSTSTART	2016-09-22 20:28:04	20085	30.2127	6542	2.28958	100	OK	24598	10.74
BURSTSTART	2016-09-22 20:30:04	20194	29.9995	2000	0.581742	100	OK	24682	10.7939		BURSTSTART	2016-09-22 20:33:04	20086	30.211	4227	1.40648	100	OK	24597	10.7395
BURSTSTART	2016-09-22 20:35:04	20195	29.9978	1447	0.370789	100	OK	24681	10.7934		BURSTSTART	2016-09-22 20:38:04	20087	30.2093	6984	2.45819	100	OK	24600	10.7408
BURSTSTART	2016-09-22 20:40:04	20196	29.9961	1479	0.382996	100	OK	24681	10.7934		BURSTSTART	2016-09-22 20:43:04	20087	30.2093	8383	2.99187	100	OK	24598	10.74
BURSTSTART	2016-09-22 20:45:04	20195	29.9978	1348	0.333023	100	OK	24682	10.7939		BURSTSTART	2016-09-22 20:48:04	20087	30.2093	4940	1.67847	100	OK	24597	10.7395
BURSTSTART	2016-09-22 20:50:04	20194	29.9995	2826	0.896836	100	OK	24680	10.793		BURSTSTART	2016-09-22 20:53:04	20088	30.2077	5638	1.94473	100	OK	24596	10.7391
BURSTSTART	2016-09-22 20:55:04	20198	29.9928	1980	0.574112	100	OK	24680	10.793		BURSTSTART	2016-09-22 20:58:04	20088	30.2077	5030	1.7128	100	OK	24593	10.7379
BURSTSTART	2016-09-22 21:00:04	20197	29.9944	2094	0.6176	100	OK	24682	10.7939		BURSTSTART	2016-09-22 21:03:04	20089	30.206	7241	2.55623	100	OK	24597	10.7395
BURSTSTART	2016-09-22 21:05:04	20202	29.9861	1975	0.572205	100	OK	24680	10.793		BURSTSTART	2016-09-22 21:08:04	20086	30.211	10522	3.80783	100	OK	24598	10.74
BURSTSTART	2016-09-22 21:10:04	20208	29.976	1738	0.481797	100	OK	24680	10.793		BURSTSTART	2016-09-22 21:13:04	20091	30.2026	7287	2.57378	100	OK	24597	10.7395
BURSTSTART	2016-09-22 21:15:04	20208	29.976	3208	1.04256	100	OK	24679	10.7926		BURSTSTART	2016-09-22 21:18:04	20091	30.2026	16792	6.19965	100	OK	24596	10.7391
BURSTSTART	2016-09-22 21:20:04	20211	29.971	1500	0.391007	100	OK	24679	10.7926		BURSTSTART	2016-09-22 21:23:04	20089	30.206	9513	3.42293	100	OK	24594	10.7383
BURSTSTART	2016-09-22 21:25:04	20211	29.971	1292	0.311661	100	OK	24680	10.793		BURSTSTART	2016-09-22 21:28:04	20092	30.2009	7671	2.72026	100	OK	24595	10.7387
BURSTSTART	2016-09-22 21:30:04	20207	29.9777	1482	0.38414	100	OK	24681	10.7934		BURSTSTART	2016-09-22 21:33:04	20092	30.2009	9900	3.57056	100	OK	24594	10.7383
BURSTSTART	2016-09-22 21:35:04	20204	29.9827	1640	0.444413	100	OK	24680	10.793		BURSTSTART	2016-09-22 21:38:04	20094	30.1976	5726	1.9783	100	OK	24595	10.7387
BURSTSTART	2016-09-22 21:40:04	20206	29.9794	1269	0.302887	100	OK	24681	10.7934		BURSTSTART	2016-09-22 21:43:04	20094	30.1976	4194	1.39389	100	OK	24594	10.7383
BURSTSTART	2016-09-22 21:45:04	20208	29.976	1555	0.411988	100	OK	24678	10.7922		BURSTSTART	2016-09-22 21:48:04	20095	30.1959	7075	2.49291	100	OK	24596	10.7391
BURSTSTART	2016-09-22 21:50:04	20207	29.9777	1222	0.284958	100	OK	24678	10.7922		BURSTSTART	2016-09-22 21:53:04	20095	30.1959	5778	1.99814	100	OK	24595	10.7387
BURSTSTART	2016-09-22 21:55:04	20206	29.9794	1166	0.263596	100	OK	24678	10.7922		BURSTSTART	2016-09-22 21:58:04	20096	30.1942	5161	1.76277	100	OK	24593	10.7379
BURSTSTART	2016-09-22 22:00:04	20205	29.981	1166	0.263596	100	OK	24679	10.7926		BURSTSTART	2016-09-22 22:03:04	20097	30.1925	5375	1.84441	100	OK	24594	10.7383
BURSTSTART	2016-09-22 22:05:04	20202	29.9861	1339	0.32959	100	OK	24679	10.7926		BURSTSTART	2016-09-22 22:08:04	20098	30.1909	6185	2.1534	100	OK	24594	10.7383
BURSTSTART	2016-09-22 22:10:04	20202	29.9861	1325	0.324249	100	OK	24680	10.793		BURSTSTART	2016-09-22 22:13:04	20098	30.1909	6788	2.38342	100	OK	24593	10.7379
BURSTSTART	2016-09-22 22:15:04	20202	29.9861	1165	0.263214	100	OK	24680	10.793		BURSTSTART	2016-09-22 22:18:04	20099	30.1892	5135	1.75286	100	OK	24592	10.7375
BURSTSTART	2016-09-22 22:20:04	20201	29.9877	1153	0.258637	100	OK	24680	10.793		BURSTSTART	2016-09-22 22:23:04	20099	30.1892	5761	1.99165	100	OK	24591	10.737
BURSTSTART	2016-09-22 22:25:04	20199	29.9911	1165	0.263214	100	OK	24681	10.7934		BURSTSTART	2016-09-22 22:28:04	20098	30.1909	7130	2.51389	100	OK	24592	10.7375
BURSTSTART	2016-09-22 22:30:04	20198	29.9928	1091	0.234986	100	OK	24679	10.7926		BURSTSTART	2016-09-22 22:33:04	20100	30.1875	5812	2.01111	100	OK	24591	10.737
BURSTSTART	2016-09-22 22:35:04	20198	29.9928	1126	0.248337	100	OK	24681	10.7934		BURSTSTART	2016-09-22 22:38:04	20101	30.1858	5122	1.74789	100	OK	24591	10.737
BURSTSTART	2016-09-22 22:40:04	20199	29.9911	1258	0.298691	100	OK	24680	10.793		BURSTSTART	2016-09-22 22:43:04	20099	30.1892	6419	2.24266	100	OK	24591	10.737
BURSTSTART	2016-09-22 22:45:04	20195	29.9978	1204	0.278092	100	OK	24680	10.793		BURSTSTART	2016-09-22 22:48:04	20101	30.1858	7143	2.51885	100	OK	24590	10.7366
BURSTSTART	2016-09-22 22:50:04	20197	29.9944	1198	0.275803	100	OK	24682	10.7939		BURSTSTART	2016-09-22 22:53:04	20103	30.1825	6250	2.17819	100	OK	24591	10.737
BURSTSTART	2016-09-22 22:55:04	20198	29.9928	1346	0.33226	100	OK	24679	10.7926		BURSTSTART	2016-09-22 22:58:04	20101	30.1858	20045	7.44057	100	OK	24592	10.7375
BURSTSTART	2016-09-22 23:00:04	20196	29.9961	1151	0.257874	100	OK	24680	10.793		BURSTSTART	2016-09-22 23:03:04	20102	30.1842	6615	2.31743	100	OK	24590	10.7366
BURSTSTART	2016-09-22 23:05:04	20193	30.0011	1377	0.344086	100	OK	24680	10.793		BURSTSTART	2016-09-22 23:08:04	20103	30.1825	6294	2.19498	100	OK	24588	10.7358
BURSTSTART	2016-09-22 23:10:04	20192	30.0028	1620	0.436783	100	OK	24681	10.7934		BURSTSTART	2016-09-22 23:13:04	20103	30.1825	10612	3.84217	100	OK	24590	10.7366
BURSTSTART	2016-09-22 23:15:04	20190	30.0062	1771	0.494385	100	OK	24682	10.7939		BURSTSTART	2016-09-22 23:18:04	20104	30.1808	7701	2.73171	100	OK	24589	10.7362
BURSTSTART	2016-09-22 23:20:04	20187	30.0112	1515	0.396729	100	OK	24680	10.793		BURSTSTART	2016-09-22 23:23:04	20104	30.1808	8220	2.92969	100	OK	24590	10.7366
BURSTSTART	2016-09-22 23:25:04	20185	30.0145	1580	0.421524	100	OK	24682	10.7939		BURSTSTART	2016-09-22 23:28:04	20103	30.1825	7150	2.52152	100	OK	24588	10.7358
BURSTSTART	2016-09-22 23:30:04	20185	30.0145	1269	0.302887	100	OK	24683	10.7943		BURSTSTART	2016-09-22 23:33:04	20101	30.1858	5455	1.87492	100	OK	24588	10.7358
BURSTSTART	2016-09-22 23:35:04	20184	30.0162	1919	0.550843	100	OK	24683	10.7943		BURSTSTART	2016-09-22 23:38:04	20101	30.1858	6089	2.11678	100	OK	24588	10.7358
BURSTSTART	2016-09-22 23:40:04	20181	30.0212	1224	0.285721	100	OK	24682	10.7939		BURSTSTART	2016-09-22 23:43:04	20100	30.1875	5244	1.79444	100	OK	24589	10.7362
BURSTSTART	2016-09-22 23:45:04	20184	30.0162	1173	0.266266	100	OK	24683	10.7943		BURSTSTART	2016-09-22 23:48:04	20100	30.1875	6497	2.27242	100	OK	24586	10.7349
BURSTSTART	2016-09-22 23:50:04	20185	30.0145	1355	0.335694	100	OK	24681	10.7934		BURSTSTART	2016-09-22 23:53:04	20097	30.1925	4922	1.6716	100	OK	24585	10.7345
BURSTSTART	2016-09-22 23:55:04	20186	30.0129	1278	0.30632	100	OK	24682	10.7939		BURSTSTART	2016-09-22 23:58:04	20099	30.1892	7141	2.51808	100	OK	24584	10.7341
BURSTSTART	2016-09-23 00:00:04	20192	30.0028	1546	0.408554	100	OK	24677	10.7917		BURSTSTART	2016-09-23 00:03:04	20099	30.1892	23970	8.93784	100	OK	24587	10.7354
BURSTSTART	2016-09-23 00:05:04	20194	29.9995	1273	0.304413	100	OK	24682	10.7939		BURSTSTART	2016-09-23 00:08:04	20096	30.1942	4863	1.64909	100	OK	24587	10.7354
BURSTSTART	2016-09-23 00:10:04	20191	30.0045	1480	0.383377	100	OK	24683	10.7943		BURSTSTART	2016-09-23 00:13:04	20095	30.1959	8246	2.93961	100	OK	24584	10.7341
BURSTSTART	2016-09-23 00:15:04	20184	30.0162	1292	0.311661	100	OK	24681	10.7934		BURSTSTART	2016-09-23 00:18:04	20095	30.1959	9353	3.3619	100	OK	24588	10.7358
BURSTSTART	2016-09-23 00:20:04	20183	30.0179	1164	0.262833	100	OK	24681	10.7934		BURSTSTART	2016-09-23 00:23:04	20096	30.1942	5099	1.73912	100	OK	24589	10.7362
BURSTSTART	2016-09-23 00:25:04	20180	30.0229	1284	0.308609	100	OK	24682	10.7939		BURSTSTART	2016-09-23 00:28:04	20095	30.1959	7617	2.69966	100	OK	24582	10.7333
BURSTSTART	2016-09-23 00:30:04	20174	30.033	1409	0.356293	100	OK	24682	10.7939		BURSTSTART	2016-09-23 00:33:04	20093	30.1993	6190	2.1553	100	OK	24584	10.7341
BURSTSTART	2016-09-23 00:35:04	20173	30.0346	1309	0.318146	100	OK	24683	10.7943		BURSTSTART	2016-09-23 00:38:04	20095	30.1959	14203	5.21202	100	OK	24584	10.7341
BURSTSTART	2016-09-23 00:40:04	20168	30.043	1368	0.340653	100	OK	24685	10.7951		BURSTSTART	2016-09-23 00:43:04	20096	30.1942	7993	2.8431	100	OK	24585	10.7345
BURSTSTART	2016-09-23 00:45:04	20171	30.038	1283	0.308228	100	OK	24686	10.7955		BURSTSTART	2016-09-23 00:48:04	20093	30.1993	6457	2.25716	100	OK	24588	10.7358
BURSTSTART	2016-09-23 00:50:04	20171	30.038	2256	0.679398	100	OK	24686	10.7955		BURSTSTART	2016-09-23 00:53:04	20094	30.1976	9948	3.58887	100	OK	24585	10.7345
BURSTSTART	2016-09-23 00:55:04	20172	30.0363	1381	0.345612	100	OK	24684	10.7947		BURSTSTART	2016-09-23 00:58:04	20098	30.1909	5533	1.90468	100	OK	24587	10.7354
BURSTSTART	2016-09-23 01:00:04	20173	30.0346	1461	0.376129	100	OK	24683	10.7943		BURSTSTART	2016-09-23 01:03:04	20101	30.1858	5093	1.73683	100	OK	24585	10.7345
BURSTSTART	2016-09-23 01:05:04	20171	30.038	1864	0.529862	100	OK	24686	10.7955		BURSTSTART	2016-09-23 01:08:04	20106	30.1774	6099	2.12059	100	OK	24583	10.7337
BURSTSTART	2016-09-23 01:10:04	20171	30.038	2074	0.609971	100	OK	24684	10.7947		BURSTSTART	2016-09-23 01:13:04	20105	30.1791	10572	3.82691	100	OK	24585	10.7345
BURSTSTART	2016-09-23 01:15:04	20170	30.0397	1769	0.493622	100	OK	24685	10.7951		BURSTSTART	2016-09-23 01:18:04	20104	30.1808	4788	1.62048	100	OK	24586	10.7349
BURSTSTART	2016-09-23 01:20:04	20169	30.0413	1717	0.473786	100	OK	24684	10.7947		BURSTSTART	2016-09-23 01:23:04	20107	30.1758	5073	1.7292	100	OK	24581	10.7329
BURSTSTART	2016-09-23 01:25:04	20169	30.0413	1500	0.391007	100	OK	24684	10.7947		BURSTSTART	2016-09-23 01:28:04	20114	30.164	4644	1.56555	100	OK	24586	10.7349
BURSTSTART	2016-09-23 01:30:04	20169	30.0413	1468	0.3788	100	OK	24687	10.796		BURSTSTART	2016-09-23 01:33:04	20114	30.164	4873	1.65291	100	OK	24582	10.7333
BURSTSTART	2016-09-23 01:35:04	20173	30.0346	1304	0.316239	100	OK	24684	10.7947		BURSTSTART	2016-09-23 01:38:04	20115	30.1623	6392	2.23236	100	OK	24584	10.7341
BURSTSTART	2016-09-23 01:40:04	20181	30.0212	1299	0.314331	100	OK	24683	10.7943		BURSTSTART	2016-09-23 01:43:04	20114	30.164	9073	3.25508	100	OK	24584	10.7341
BURSTSTART	2016-09-23 01:45:04	20181	30.0212	1469	0.379181	100	OK	24685	10.7951		BURSTSTART	2016-09-23 01:48:04	20111	30.169	8559	3.05901	100	OK	24585	10.7345
BURSTSTART	2016-09-23 01:50:04	20179	30.0246	1827	0.515747	100	OK	24684	10.7947		BURSTSTART	2016-09-23 01:53:04	20114	30.164	36215	13.6089	100	OK	24584	10.7341
BURSTSTART	2016-09-23 01:55:04	20180	30.0229	1492	0.387955	100	OK	24685	10.7951		BURSTSTART	2016-09-23 01:58:04	20116	30.1607	5155	1.76048	100	OK	24585	10.7345
BURSTSTART	2016-09-23 02:00:04	20181	30.0212	1796	0.503922	100	OK	24684	10.7947		BURSTSTART	2016-09-23 02:03:04	20114	30.164	8129	2.89498	100	OK	24585	10.7345
BURSTSTART	2016-09-23 02:05:04	20182	30.0196	1596	0.427628	100	OK	24685	10.7951		BURSTSTART	2016-09-23 02:08:04	20115	30.1623	6760	2.37274	100	OK	24580	10.7324
BURSTSTART	2016-09-23 02:10:04	20185	30.0145	1625	0.43869	100	OK	24684	10.7947		BURSTSTART	2016-09-23 02:13:04	20122	30.1506	7159	2.52495	100	OK	24581	10.7329
BURSTSTART	2016-09-23 02:15:04	20183	30.0179	1275	0.305176	100	OK	24684	10.7947		BURSTSTART	2016-09-23 02:18:04	20126	30.1439	9233	3.31612	100	OK	24582	10.7333
BURSTSTART	2016-09-23 02:20:04	20184	30.0162	1561	0.414276	100	OK	24684	10.7947		BURSTSTART	2016-09-23 02:23:04	20126	30.1439	5299	1.81542	100	OK	24582	10.7333
BURSTSTART	2016-09-23 02:25:04	20185	30.0145	1915	0.549317	100	OK	24684	10.7947		BURSTSTART	2016-09-23 02:28:04	20128	30.1405	3975	1.31035	100	OK	24581	10.7329
BURSTSTART	2016-09-23 02:30:04	20183	30.0179	2675	0.839234	100	OK	24683	10.7943		BURSTSTART	2016-09-23 02:33:04	20132	30.1338	5030	1.7128	100	OK	24583	10.7337
BURSTSTART	2016-09-23 02:35:04	20187	30.0112	2009	0.585175	100	OK	24683	10.7943		BURSTSTART	2016-09-23 02:38:04	20134	30.1305	6071	2.10991	100	OK	24581	10.7329
BURSTSTART	2016-09-23 02:40:04	20187	30.0112	3540	1.16921	100	OK	24686	10.7955		BURSTSTART	2016-09-23 02:43:04	20135	30.1288	7338	2.59323	100	OK	24582	10.7333
BURSTSTART	2016-09-23 02:45:04	20187	30.0112	1769	0.493622	100	OK	24682	10.7939		BURSTSTART	2016-09-23 02:48:04	20135	30.1288	4071	1.34697	100	OK	24584	10.7341
BURSTSTART	2016-09-23 02:50:04	20191	30.0045	1912	0.548172	100	OK	24684	10.7947		BURSTSTART	2016-09-23 02:53:04	20137	30.1254	4708	1.58997	100	OK	24582	10.7333
BURSTSTART	2016-09-23 02:55:04	20199	29.9911	2838	0.901414	100	OK	24682	10.7939		BURSTSTART	2016-09-23 02:58:04	20137	30.1254	5291	1.81236	100	OK	24580	10.7324
BURSTSTART	2016-09-23 03:00:04	20209	29.9743	2010	0.585556	100	OK	24683	10.7943		BURSTSTART	2016-09-23 03:03:04	20136	30.1271	5010	1.70517	100	OK	24581	10.7329
BURSTSTART	2016-09-23 03:05:04	20213	29.9676	1306	0.317002	100	OK	24681	10.7934		BURSTSTART	2016-09-23 03:08:04	20138	30.1238	7090	2.49863	100	OK	24581	10.7329
BURSTSTART	2016-09-23 03:10:04	20214	29.966	4030	1.35613	100	OK	24682	10.7939		BURSTSTART	2016-09-23 03:13:04	20139	30.1221	4671	1.57585	100	OK	24581	10.7329
BURSTSTART	2016-09-23 03:15:04	20215	29.9643	1566	0.416184	100	OK	24683	10.7943		BURSTSTART	2016-09-23 03:18:04	20137	30.1254	8825	3.16048	100	OK	24577	10.7312
BURSTSTART	2016-09-23 03:20:04	20216	29.9626	3524	1.1631	100	OK	24681	10.7934		BURSTSTART	2016-09-23 03:23:04	20138	30.1238	5173	1.76735	100	OK	24580	10.7324
BURSTSTART	2016-09-23 03:25:04	20219	29.9576	1563	0.415039	100	OK	24681	10.7934		BURSTSTART	2016-09-23 03:28:04	20142	30.1171	5140	1.75476	100	OK	24578	10.7316
BURSTSTART	2016-09-23 03:30:04	20216	29.9626	1871	0.532532	100	OK	24683	10.7943		BURSTSTART	2016-09-23 03:33:04	20147	30.1087	5206	1.77994	100	OK	24579	10.732
BURSTSTART	2016-09-23 03:35:04	20222	29.9526	3024	0.972367	100	OK	24680	10.793		BURSTSTART	2016-09-23 03:38:04	20148	30.107	4461	1.49574	100	OK	24581	10.7329
BURSTSTART	2016-09-23 03:40:04	20222	29.9526	2486	0.767136	100	OK	24682	10.7939		BURSTSTART	2016-09-23 03:43:04	20151	30.102	5821	2.01454	100	OK	24579	10.732
BURSTSTART	2016-09-23 03:45:04	20222	29.9526	3182	1.03264	100	OK	24681	10.7934		BURSTSTART	2016-09-23 03:48:04	20153	30.0986	7323	2.58751	100	OK	24579	10.732
BURSTSTART	2016-09-23 03:50:04	20217	29.9609	1563	0.415039	100	OK	24683	10.7943		BURSTSTART	2016-09-23 03:53:04	20152	30.1003	5897	2.04353	100	OK	24580	10.7324
BURSTSTART	2016-09-23 03:55:04	20218	29.9593	2087	0.61493	100	OK	24681	10.7934		BURSTSTART	2016-09-23 03:58:04	20150	30.1037	8069	2.87209	100	OK	24579	10.732
BURSTSTART	2016-09-23 04:00:04	20221	29.9543	1397	0.351715	100	OK	24680	10.793		BURSTSTART	2016-09-23 04:03:04	20151	30.102	19368	7.18232	100	OK	24580	10.7324
BURSTSTART	2016-09-23 04:05:04	20225	29.9476	1237	0.29068	100	OK	24681	10.7934		BURSTSTART	2016-09-23 04:08:04	20151	30.102	4816	1.63117	100	OK	24578	10.7316
BURSTSTART	2016-09-23 04:10:04	20225	29.9476	1173	0.266266	100	OK	24680	10.793		BURSTSTART	2016-09-23 04:13:04	20151	30.102	10106	3.64914	100	OK	24577	10.7312
BURSTSTART	2016-09-23 04:15:04	20227	29.9442	1160	0.261307	100	OK	24680	10.793		BURSTSTART	2016-09-23 04:18:04	20152	30.1003	6064	2.10724	100	OK	24577	10.7312
BURSTSTART	2016-09-23 04:20:04	20223	29.9509	5226	1.81236	100	OK	24679	10.7926		BURSTSTART	2016-09-23 04:23:04	20154	30.097	8922	3.19748	100	OK	24577	10.7312
BURSTSTART	2016-09-23 04:25:04	20223	29.9509	1193	0.273895	100	OK	24680	10.793		BURSTSTART	2016-09-23 04:28:04	20157	30.0919	4392	1.46942	100	OK	24579	10.732
BURSTSTART	2016-09-23 04:30:04	20224	29.9492	1097	0.237274	100	OK	24681	10.7934		BURSTSTART	2016-09-23 04:33:04	20158	30.0903	5944	2.06146	100	OK	24577	10.7312
BURSTSTART	2016-09-23 04:35:04	20224	29.9492	2083	0.613404	100	OK	24682	10.7939		BURSTSTART	2016-09-23 04:38:04	20156	30.0936	4014	1.32523	100	OK	24577	10.7312
BURSTSTART	2016-09-23 04:40:04	20223	29.9509	2370	0.722886	100	OK	24684	10.7947		BURSTSTART	2016-09-23 04:43:04	20158	30.0903	4529	1.52168	100	OK	24581	10.7329
BURSTSTART	2016-09-23 04:45:04	20223	29.9509	2002	0.582505	100	OK	24681	10.7934		BURSTSTART	2016-09-23 04:48:04	20157	30.0919	6351	2.21672	100	OK	24577	10.7312
BURSTSTART	2016-09-23 04:50:04	20226	29.9459	1539	0.405884	100	OK	24681	10.7934		BURSTSTART	2016-09-23 04:53:04	20160	30.0869	14726	5.41153	100	OK	24580	10.7324
BURSTSTART	2016-09-23 04:55:04	20227	29.9442	2256	0.679398	100	OK	24681	10.7934		BURSTSTART	2016-09-23 04:58:04	20162	30.0836	3984	1.31378	100	OK	24579	10.732
BURSTSTART	2016-09-23 05:00:04	20226	29.9459	1805	0.507355	100	OK	24681	10.7934		BURSTSTART	2016-09-23 05:03:04	20165	30.0785	5984	2.07672	100	OK	24576	10.7308
BURSTSTART	2016-09-23 05:05:04	20229	29.9409	1677	0.458527	100	OK	24680	10.793		BURSTSTART	2016-09-23 05:08:04	20165	30.0785	6499	2.27318	100	OK	24577	10.7312
BURSTSTART	2016-09-23 05:10:04	20227	29.9442	1702	0.468064	100	OK	24678	10.7922		BURSTSTART	2016-09-23 05:13:04	20167	30.0752	6094	2.11868	100	OK	24579	10.732
BURSTSTART	2016-09-23 05:15:04	20233	29.9342	1993	0.579071	100	OK	24679	10.7926		BURSTSTART	2016-09-23 05:18:04	20169	30.0718	6133	2.13356	100	OK	24580	10.7324
BURSTSTART	2016-09-23 05:20:04	20238	29.9258	3214	1.04485	100	OK	24680	10.793		BURSTSTART	2016-09-23 05:23:04	20168	30.0735	9027	3.23754	100	OK	24578	10.7316
BURSTSTART	2016-09-23 05:25:04	20235	29.9308	1508	0.394059	100	OK	24680	10.793		BURSTSTART	2016-09-23 05:28:04	20168	30.0735	7347	2.59667	100	OK	24580	10.7324
BURSTSTART	2016-09-23 05:30:04	20237	29.9275	1586	0.423813	100	OK	24681	10.7934		BURSTSTART	2016-09-23 05:33:04	20167	30.0752	16978	6.2706	100	OK	24580	10.7324
BURSTSTART	2016-09-23 05:35:04	20238	29.9258	1613	0.434113	100	OK	24681	10.7934		BURSTSTART	2016-09-23 05:38:04	20166	30.0769	5737	1.9825	100	OK	24579	10.732
BURSTSTART	2016-09-23 05:40:04	20243	29.9175	1647	0.447083	100	OK	24679	10.7926		BURSTSTART	2016-09-23 05:43:04	20162	30.0836	6204	2.16065	100	OK	24582	10.7333
BURSTSTART	2016-09-23 05:45:04	20240	29.9225	1147	0.256348	100	OK	24680	10.793		BURSTSTART	2016-09-23 05:48:04	20163	30.0819	6527	2.28386	100	OK	24576	10.7308
BURSTSTART	2016-09-23 05:50:04	20240	29.9225	1505	0.392914	100	OK	24680	10.793		BURSTSTART	2016-09-23 05:53:04	20165	30.0785	11060	4.01306	100	OK	24577	10.7312
BURSTSTART	2016-09-23 05:55:04	20243	29.9175	1691	0.463868	100	OK	24679	10.7926		BURSTSTART	2016-09-23 05:58:04	20166	30.0769	5394	1.85166	100	OK	24575	10.7303
BURSTSTART	2016-09-23 06:00:04	20244	29.9158	1174	0.266648	100	OK	24680	10.793		BURSTSTART	2016-09-23 06:03:04	20168	30.0735	7063	2.48833	100	OK	24576	10.7308
BURSTSTART	2016-09-23 06:05:04	20245	29.9141	2759	0.871277	100	OK	24681	10.7934		BURSTSTART	2016-09-23 06:08:04	20170	30.0702	6897	2.42501	100	OK	24580	10.7324
BURSTSTART	2016-09-23 06:10:04	20247	29.9108	1247	0.294495	100	OK	24679	10.7926		BURSTSTART	2016-09-23 06:13:04	20171	30.0685	5996	2.0813	100	OK	24575	10.7303
BURSTSTART	2016-09-23 06:15:04	20246	29.9124	1544	0.407791	100	OK	24679	10.7926		BURSTSTART	2016-09-23 06:18:04	20171	30.0685	5054	1.72196	100	OK	24577	10.7312
BURSTSTART	2016-09-23 06:20:04	20250	29.9058	1541	0.406647	100	OK	24679	10.7926		BURSTSTART	2016-09-23 06:23:04	20170	30.0702	6264	2.18353	100	OK	24575	10.7303
BURSTSTART	2016-09-23 06:25:04	20251	29.9041	1214	0.281906	100	OK	24680	10.793		BURSTSTART	2016-09-23 06:28:04	20171	30.0685	5084	1.7334	100	OK	24574	10.7299
BURSTSTART	2016-09-23 06:30:04	20248	29.9091	1499	0.390625	100	OK	24680	10.793		BURSTSTART	2016-09-23 06:33:04	20170	30.0702	6738	2.36435	100	OK	24579	10.732
BURSTSTART	2016-09-23 06:35:04	20250	29.9058	1538	0.405503	100	OK	24679	10.7926		BURSTSTART	2016-09-23 06:38:04	20170	30.0702	7127	2.51274	100	OK	24577	10.7312
BURSTSTART	2016-09-23 06:40:04	20246	29.9124	1329	0.325775	100	OK	24679	10.7926		BURSTSTART	2016-09-23 06:43:04	20168	30.0735	6571	2.30065	100	OK	24573	10.7295
BURSTSTART	2016-09-23 06:45:04	20248	29.9091	2436	0.748063	100	OK	24679	10.7926		BURSTSTART	2016-09-23 06:48:04	20175	30.0618	8313	2.96517	100	OK	24575	10.7303
BURSTSTART	2016-09-23 06:50:04	20249	29.9074	1604	0.43068	100	OK	24679	10.7926		BURSTSTART	2016-09-23 06:53:04	20174	30.0635	7244	2.55737	100	OK	24575	10.7303
BURSTSTART	2016-09-23 06:55:04	20246	29.9124	1350	0.333786	100	OK	24680	10.793		BURSTSTART	2016-09-23 06:58:04	20174	30.0635	9168	3.29132	100	OK	24574	10.7299
BURSTSTART	2016-09-23 07:00:04	20249	29.9074	1295	0.312805	100	OK	24680	10.793		BURSTSTART	2016-09-23 07:03:04	20180	30.0534	10660	3.86048	100	OK	24575	10.7303
BURSTSTART	2016-09-23 07:05:04	20246	29.9124	1275	0.305176	100	OK	24679	10.7926		BURSTSTART	2016-09-23 07:08:04	20181	30.0517	9114	3.27072	100	OK	24575	10.7303
BURSTSTART	2016-09-23 07:10:04	20248	29.9091	1455	0.373841	100	OK	24679	10.7926		BURSTSTART	2016-09-23 07:13:04	20182	30.0501	5790	2.00272	100	OK	24577	10.7312
BURSTSTART	2016-09-23 07:15:04	20251	29.9041	1722	0.475693	100	OK	24679	10.7926		BURSTSTART	2016-09-23 07:18:04	20183	30.0484	5097	1.73836	100	OK	24571	10.7287
BURSTSTART	2016-09-23 07:20:04	20255	29.8974	1393	0.350189	100	OK	24680	10.793		BURSTSTART	2016-09-23 07:23:04	20183	30.0484	7104	2.50397	100	OK	24575	10.7303
BURSTSTART	2016-09-23 07:25:04	20252	29.9024	1284	0.308609	100	OK	24677	10.7917		BURSTSTART	2016-09-23 07:28:04	20181	30.0517	6910	2.42996	100	OK	24576	10.7308
BURSTSTART	2016-09-23 07:30:04	20252	29.9024	1775	0.495911	100	OK	24679	10.7926		BURSTSTART	2016-09-23 07:33:04	20186	30.0434	6344	2.21405	100	OK	24573	10.7295
BURSTSTART	2016-09-23 07:35:04	20252	29.9024	1695	0.465393	100	OK	24681	10.7934		BURSTSTART	2016-09-23 07:38:04	20187	30.0417	4908	1.66626	100	OK	24570	10.7282
BURSTSTART	2016-09-23 07:40:04	20251	29.9041	2039	0.596619	100	OK	24679	10.7926		BURSTSTART	2016-09-23 07:43:04	20189	30.0384	7160	2.52533	100	OK	24573	10.7295
BURSTSTART	2016-09-23 07:45:04	20253	29.9007	1753	0.487519	100	OK	24678	10.7922		BURSTSTART	2016-09-23 07:48:04	20188	30.04	5992	2.07977	100	OK	24578	10.7316
BURSTSTART	2016-09-23 07:50:04	20251	29.9041	1495	0.389099	100	OK	24679	10.7926		BURSTSTART	2016-09-23 07:53:04	20187	30.0417	10854	3.93448	100	OK	24572	10.7291
BURSTSTART	2016-09-23 07:55:04	20252	29.9024	1783	0.498963	100	OK	24680	10.793		BURSTSTART	2016-09-23 07:58:04	20190	30.0367	8723	3.12157	100	OK	24573	10.7295
BURSTSTART	2016-09-23 08:00:04	20249	29.9074	2795	0.88501	100	OK	24679	10.7926		BURSTSTART	2016-09-23 08:03:04	20192	30.0333	7925	2.81716	100	OK	24575	10.7303
BURSTSTART	2016-09-23 08:05:04	20251	29.9041	1808	0.508499	100	OK	24680	10.793		BURSTSTART	2016-09-23 08:08:04	20191	30.035	5451	1.8734	100	OK	24572	10.7291
BURSTSTART	2016-09-23 08:10:04	20252	29.9024	1357	0.336457	100	OK	24679	10.7926		BURSTSTART	2016-09-23 08:13:04	20193	30.0317	7031	2.47612	100	OK	24570	10.7282
BURSTSTART	2016-09-23 08:15:04	20251	29.9041	1300	0.314713	100	OK	24680	10.793		BURSTSTART	2016-09-23 08:18:04	20191	30.035	5828	2.01721	100	OK	24572	10.7291
BURSTSTART	2016-09-23 08:20:04	20253	29.9007	1547	0.408936	100	OK	24680	10.793		BURSTSTART	2016-09-23 08:23:04	20189	30.0384	17486	6.46439	100	OK	24574	10.7299
BURSTSTART	2016-09-23 08:25:04	20253	29.9007	1586	0.423813	100	OK	24680	10.793		BURSTSTART	2016-09-23 08:28:04	20189	30.0384	6196	2.15759	100	OK	24569	10.7278
BURSTSTART	2016-09-23 08:30:04	20254	29.8991	1235	0.289917	100	OK	24679	10.7926		BURSTSTART	2016-09-23 08:33:04	20191	30.035	9258	3.32565	100	OK	24573	10.7295
BURSTSTART	2016-09-23 08:35:04	20255	29.8974	1431	0.364685	100	OK	24680	10.793		BURSTSTART	2016-09-23 08:38:04	20187	30.0417	7315	2.58446	100	OK	24570	10.7282
BURSTSTART	2016-09-23 08:40:04	20252	29.9024	2030	0.593186	100	OK	24681	10.7934		BURSTSTART	2016-09-23 08:43:04	20187	30.0417	6905	2.42806	100	OK	24567	10.727
BURSTSTART	2016-09-23 08:45:04	20256	29.8957	2980	0.955582	100	OK	24680	10.793		BURSTSTART	2016-09-23 08:48:04	20185	30.0451	7368	2.60468	100	OK	24571	10.7287
BURSTSTART	2016-09-23 08:50:04	20253	29.9007	1426	0.362778	100	OK	24681	10.7934		BURSTSTART	2016-09-23 08:53:04	20186	30.0434	9931	3.58238	100	OK	24564	10.7257
BURSTSTART	2016-09-23 08:55:04	20255	29.8974	1617	0.435639	100	OK	24680	10.793		BURSTSTART	2016-09-23 08:58:04	20181	30.0517	7086	2.4971	100	OK	24567	10.727
BURSTSTART	2016-09-23 09:00:04	20256	29.8957	1588	0.424576	100	OK	24679	10.7926		BURSTSTART	2016-09-23 09:03:04	20182	30.0501	6105	2.12288	100	OK	24569	10.7278
BURSTSTART	2016-09-23 09:05:04	20256	29.8957	1635	0.442505	100	OK	24683	10.7943		BURSTSTART	2016-09-23 09:08:04	20180	30.0534	6615	2.31743	100	OK	24565	10.7262
BURSTSTART	2016-09-23 09:10:04	20256	29.8957	1302	0.315476	100	OK	24680	10.793		BURSTSTART	2016-09-23 09:13:04	20179	30.0551	6738	2.36435	100	OK	24565	10.7262
BURSTSTART	2016-09-23 09:15:04	20256	29.8957	1809	0.508881	100	OK	24679	10.7926		BURSTSTART	2016-09-23 09:18:04	20177	30.0584	7087	2.49748	100	OK	24567	10.727
BURSTSTART	2016-09-23 09:20:04	20260	29.889	2126	0.629807	100	OK	24681	10.7934		BURSTSTART	2016-09-23 09:23:04	20176	30.0601	5247	1.79558	100	OK	24565	10.7262
BURSTSTART	2016-09-23 09:25:04	20261	29.8874	2042	0.597763	100	OK	24679	10.7926		BURSTSTART	2016-09-23 09:28:04	20174	30.0635	8201	2.92244	100	OK	24565	10.7262
BURSTSTART	2016-09-23 09:30:04	20261	29.8874	1379	0.344849	100	OK	24679	10.7926		BURSTSTART	2016-09-23 09:33:04	20173	30.0651	7083	2.49596	100	OK	24565	10.7262
BURSTSTART	2016-09-23 09:35:04	20262	29.8857	1291	0.31128	100	OK	24679	10.7926		BURSTSTART	2016-09-23 09:38:04	20172	30.0668	6972	2.45362	100	OK	24563	10.7253
BURSTSTART	2016-09-23 09:40:04	20261	29.8874	1270	0.303269	100	OK	24681	10.7934		BURSTSTART	2016-09-23 09:43:04	20173	30.0651	6992	2.46124	100	OK	24563	10.7253
BURSTSTART	2016-09-23 09:45:04	20259	29.8907	2382	0.727463	100	OK	24680	10.793		BURSTSTART	2016-09-23 09:48:04	20174	30.0635	5089	1.73531	100	OK	24565	10.7262
BURSTSTART	2016-09-23 09:50:04	20259	29.8907	1332	0.32692	100	OK	24679	10.7926		BURSTSTART	2016-09-23 09:53:04	20174	30.0635	5688	1.96381	100	OK	24563	10.7253
BURSTSTART	2016-09-23 09:55:04	20255	29.8974	2673	0.838471	100	OK	24681	10.7934		BURSTSTART	2016-09-23 09:58:04	20172	30.0668	7767	2.75688	100	OK	24562	10.7249
BURSTSTART	2016-09-23 10:00:04	20255	29.8974	1538	0.405503	100	OK	24679	10.7926		BURSTSTART	2016-09-23 10:03:04	20170	30.0702	5635	1.94359	100	OK	24563	10.7253
BURSTSTART	2016-09-23 10:05:04	20252	29.9024	1483	0.384522	100	OK	24680	10.793		BURSTSTART	2016-09-23 10:08:04	20167	30.0752	6407	2.23808	100	OK	24560	10.7241
BURSTSTART	2016-09-23 10:10:04	20250	29.9058	1887	0.538636	100	OK	24681	10.7934		BURSTSTART	2016-09-23 10:13:04	20168	30.0735	5661	1.95351	100	OK	24563	10.7253
BURSTSTART	2016-09-23 10:15:04	20248	29.9091	1463	0.376892	100	OK	24680	10.793		BURSTSTART	2016-09-23 10:18:04	20166	30.0769	14946	5.49546	100	OK	24561	10.7245
BURSTSTART	2016-09-23 10:20:04	20245	29.9141	1731	0.479126	100	OK	24679	10.7926		BURSTSTART	2016-09-23 10:23:04	20166	30.0769	7369	2.60506	100	OK	24563	10.7253
BURSTSTART	2016-09-23 10:25:04	20245	29.9141	2792	0.883866	100	OK	24680	10.793		BURSTSTART	2016-09-23 10:28:04	20166	30.0769	5393	1.85127	100	OK	24559	10.7236
BURSTSTART	2016-09-23 10:30:04	20244	29.9158	4046	1.36223	100	OK	24682	10.7939		BURSTSTART	2016-09-23 10:33:04	20162	30.0836	9787	3.52745	100	OK	24559	10.7236
BURSTSTART	2016-09-23 10:35:04	20242	29.9191	31863	11.9736	100	OK	24682	10.7939		BURSTSTART	2016-09-23 10:38:04	20164	30.0802	5903	2.04582	100	OK	24559	10.7236
BURSTSTART	2016-09-23 10:40:04	20245	29.9141	1606	0.431443	100	OK	24681	10.7934		BURSTSTART	2016-09-23 10:43:04	20162	30.0836	6161	2.14424	100	OK	24560	10.7241
BURSTSTART	2016-09-23 10:45:04	20244	29.9158	1618	0.43602	100	OK	24684	10.7947		BURSTSTART	2016-09-23 10:48:04	20158	30.0903	7802	2.77024	100	OK	24560	10.7241
BURSTSTART	2016-09-23 10:50:04	20242	29.9191	2121	0.6279	100	OK	24682	10.7939		BURSTSTART	2016-09-23 10:53:04	20159	30.0886	6294	2.19498	100	OK	24561	10.7245
BURSTSTART	2016-09-23 10:55:04	20239	29.9241	1922	0.551987	100	OK	24685	10.7951		BURSTSTART	2016-09-23 10:58:04	20158	30.0903	5451	1.8734	100	OK	24559	10.7236
BURSTSTART	2016-09-23 11:00:04	20242	29.9191	1481	0.383759	100	OK	24684	10.7947		BURSTSTART	2016-09-23 11:03:04	20155	30.0953	7309	2.58217	100	OK	24560	10.7241
BURSTSTART	2016-09-23 11:05:04	20236	29.9292	1851	0.524903	100	OK	24681	10.7934		BURSTSTART	2016-09-23 11:08:04	20152	30.1003	9272	3.331	100	OK	24556	10.7224
BURSTSTART	2016-09-23 11:10:04	20233	29.9342	7581	2.71073	100	OK	24684	10.7947		BURSTSTART	2016-09-23 11:13:04	20147	30.1087	10546	3.81699	100	OK	24556	10.7224
BURSTSTART	2016-09-23 11:15:04	20234	29.9325	1612	0.433731	100	OK	24681	10.7934		BURSTSTART	2016-09-23 11:18:04	20149	30.1053	8345	2.97737	100	OK	24557	10.7228
BURSTSTART	2016-09-23 11:20:04	20237	29.9275	1764	0.491715	100	OK	24681	10.7934		BURSTSTART	2016-09-23 11:23:04	20150	30.1037	8846	3.16849	100	OK	24557	10.7228
BURSTSTART	2016-09-23 11:25:04	20231	29.9375	2808	0.889969	100	OK	24684	10.7947		BURSTSTART	2016-09-23 11:28:04	20151	30.102	6566	2.29874	100	OK	24558	10.7232
BURSTSTART	2016-09-23 11:30:04	20230	29.9392	2295	0.694275	100	OK	24683	10.7943		BURSTSTART	2016-09-23 11:33:04	20148	30.107	8455	3.01933	100	OK	24558	10.7232
BURSTSTART	2016-09-23 11:35:04	20231	29.9375	1979	0.573731	100	OK	24687	10.796		BURSTSTART	2016-09-23 11:38:04	20150	30.1037	8509	3.03993	100	OK	24559	10.7236
BURSTSTART	2016-09-23 11:40:04	20230	29.9392	1739	0.482178	100	OK	24684	10.7947		BURSTSTART	2016-09-23 11:43:04	20151	30.102	20334	7.55082	100	OK	24558	10.7232
BURSTSTART	2016-09-23 11:45:04	20226	29.9459	1963	0.567627	100	OK	24682	10.7939		BURSTSTART	2016-09-23 11:48:04	20153	30.0986	9254	3.32413	100	OK	24559	10.7236
BURSTSTART	2016-09-23 11:50:04	20231	29.9375	1928	0.554276	100	OK	24684	10.7947		BURSTSTART	2016-09-23 11:53:04	20153	30.0986	12611	4.60472	100	OK	24560	10.7241
BURSTSTART	2016-09-23 11:55:04	20231	29.9375	1908	0.546646	100	OK	24684	10.7947		BURSTSTART	2016-09-23 11:58:04	20152	30.1003	26606	9.9434	100	OK	24559	10.7236
BURSTSTART	2016-09-23 12:00:04	20232	29.9358	3402	1.11656	100	OK	24683	10.7943		BURSTSTART	2016-09-23 12:03:04	20148	30.107	9434	3.39279	100	OK	24559	10.7236
BURSTSTART	2016-09-23 12:05:04	20233	29.9342	1906	0.545884	100	OK	24682	10.7939		BURSTSTART	2016-09-23 12:08:04	20145	30.112	13826	5.06821	100	OK	24555	10.722
BURSTSTART	2016-09-23 12:10:04	20230	29.9392	3961	1.3298	100	OK	24684	10.7947		BURSTSTART	2016-09-23 12:13:04	20141	30.1187	10503	3.80059	100	OK	24555	10.722
BURSTSTART	2016-09-23 12:15:04	20231	29.9375	4423	1.50604	100	OK	24683	10.7943		BURSTSTART	2016-09-23 12:18:04	20136	30.1271	7789	2.76528	100	OK	24555	10.722
BURSTSTART	2016-09-23 12:20:04	20229	29.9409	2928	0.935746	100	OK	24684	10.7947		BURSTSTART	2016-09-23 12:23:04	20131	30.1355	27727	10.371	100	OK	24555	10.722
BURSTSTART	2016-09-23 12:25:04	20232	29.9358	4061	1.36795	100	OK	24684	10.7947		BURSTSTART	2016-09-23 12:28:04	20122	30.1506	14867	5.46532	100	OK	24553	10.7211
BURSTSTART	2016-09-23 12:30:04	20229	29.9409	2173	0.647736	100	OK	24684	10.7947		BURSTSTART	2016-09-23 12:33:04	20119	30.1556	20482	7.60727	100	OK	24553	10.7211
BURSTSTART	2016-09-23 12:35:04	20229	29.9409	5853	2.05155	100	OK	24684	10.7947		BURSTSTART	2016-09-23 12:38:04	20113	30.1657	31503	11.8115	100	OK	24551	10.7203
BURSTSTART	2016-09-23 12:40:04	20225	29.9476	3193	1.03683	100	OK	24686	10.7955		BURSTSTART	2016-09-23 12:43:04	20107	30.1758	20328	7.54853	100	OK	24552	10.7207
BURSTSTART	2016-09-23 12:45:04	20229	29.9409	40815	15.3885	100	OK	24685	10.7951		BURSTSTART	2016-09-23 12:48:04	20100	30.1875	7849	2.78816	100	OK	24553	10.7211
BURSTSTART	2016-09-23 12:50:04	20229	29.9409	11537	4.21982	100	OK	24685	10.7951		BURSTSTART	2016-09-23 12:53:04	20095	30.1959	40321	15.1753	100	OK	24548	10.719
BURSTSTART	2016-09-23 12:55:04	20229	29.9409	12472	4.5765	100	OK	24683	10.7943		BURSTSTART	2016-09-23 12:58:04	20095	30.1959	32651	12.2494	100	OK	24550	10.7199
BURSTSTART	2016-09-23 13:00:04	20227	29.9442	4734	1.62468	100	OK	24684	10.7947		BURSTSTART	2016-09-23 13:03:04	20089	30.206	17580	6.50025	100	OK	24549	10.7195
BURSTSTART	2016-09-23 13:05:04	20228	29.9425	8556	3.08266	100	OK	24685	10.7951		BURSTSTART	2016-09-23 13:08:04	20087	30.2093	15389	5.66445	100	OK	24548	10.719
BURSTSTART	2016-09-23 13:10:04	20225	29.9476	6435	2.27356	100	OK	24686	10.7955		BURSTSTART	2016-09-23 13:13:04	20085	30.2127	43642	16.4421	100	OK	24547	10.7186
BURSTSTART	2016-09-23 13:15:04	20229	29.9409	5395	1.87683	100	OK	24684	10.7947		BURSTSTART	2016-09-23 13:18:04	20082	30.2177	21584	8.02765	100	OK	24548	10.719
BURSTSTART	2016-09-23 13:20:04	20232	29.9358	12630	4.63677	100	OK	24683	10.7943		BURSTSTART	2016-09-23 13:23:04	20079	30.2228	33820	12.6953	100	OK	24548	10.719
BURSTSTART	2016-09-23 13:25:04	20231	29.9375	7269	2.59171	100	OK	24684	10.7947		BURSTSTART	2016-09-23 13:28:04	20088	30.2077	5840	10.0994	20	OK	24543	10.717
BURSTSTART	2016-09-23 13:30:04	20232	29.9358	8632	3.11165	100	OK	24684	10.7947		BURSTSTART	2016-09-23 13:33:04	20087	30.2093	44047	16.5966	100	OK	24548	10.719
BURSTSTART	2016-09-23 13:35:04	20231	29.9375	9436	3.41835	100	OK	24685	10.7951		BURSTSTART	2016-09-23 13:38:04	20100	30.1875	34833	13.0817	100	OK	21752	9.54888
BURSTSTART	2016-09-23 13:40:04	20232	29.9358	7129	2.5383	100	OK	24685	10.7951		BURSTSTART	2016-09-23 13:43:04	20101	30.1858	36391	13.6761	100	OK	24555	10.722
BURSTSTART	2016-09-23 13:45:04	20236	29.9292	14363	5.29786	100	OK	24682	10.7939		BURSTSTART	2016-09-23 13:48:04	20109	30.1724	45682	17.2203	100	OK	24551	10.7203
BURSTSTART	2016-09-23 13:50:04	20233	29.9342	5922	2.07787	100	OK	24684	10.7947		BURSTSTART	2016-09-23 13:53:04	20110	30.1707	40443	15.2218	100	OK	24552	10.7207
BURSTSTART	2016-09-23 13:55:04	20232	29.9358	8381	3.0159	100	OK	24685	10.7951		BURSTSTART	2016-09-23 13:58:04	20108	30.1741	32684	12.262	100	OK	24551	10.7203
BURSTSTART	2016-09-23 14:00:04	20231	29.9375	10791	3.93524	100	OK	22953	10.0662		BURSTSTART	2016-09-23 14:03:04	20103	30.1825	22149	8.24319	100	OK	24550	10.7199
BURSTSTART	2016-09-23 14:05:04	20232	29.9358	14324	5.28298	100	OK	24683	10.7943		BURSTSTART	2016-09-23 14:08:04	20104	30.1808	31803	11.9259	100	OK	24552	10.7207
BURSTSTART	2016-09-23 14:10:04	20233	29.9342	14443	5.32837	100	OK	24682	10.7939		BURSTSTART	2016-09-23 14:13:04	20108	30.1741	32075	12.0297	100	OK	24552	10.7207
BURSTSTART	2016-09-23 14:15:04	20232	29.9358	9392	3.40157	100	OK	24683	10.7943		BURSTSTART	2016-09-23 14:18:04	20113	30.1657	9248	16.5997	20	OK	24541	10.7161
BURSTSTART	2016-09-23 14:20:04	20228	29.9425	6519	2.3056	100	OK	24681	10.7934		BURSTSTART	2016-09-23 14:23:04	20116	30.1607	31885	11.9572	100	OK	24551	10.7203
BURSTSTART	2016-09-23 14:25:04	20231	29.9375	19731	7.34559	100	OK	24681	10.7934		BURSTSTART	2016-09-23 14:28:04	20121	30.1523	31780	11.9171	100	OK	24553	10.7211
BURSTSTART	2016-09-23 14:30:04	20230	29.9392	9965	3.62015	100	OK	24683	10.7943		BURSTSTART	2016-09-23 14:33:04	20120	30.154	24664	9.20258	100	OK	24551	10.7203
BURSTSTART	2016-09-23 14:35:04	20229	29.9409	9556	3.46413	100	OK	24681	10.7934		BURSTSTART	2016-09-23 14:38:04	20124	30.1472	24851	9.27392	100	OK	24552	10.7207
BURSTSTART	2016-09-23 14:40:04	20229	29.9409	31534	11.8481	100	OK	24682	10.7939		BURSTSTART	2016-09-23 14:43:04	20126	30.1439	29744	11.1404	100	OK	24550	10.7199
BURSTSTART	2016-09-23 14:45:04	20227	29.9442	10231	3.72162	100	OK	24681	10.7934		BURSTSTART	2016-09-23 14:48:04	20126	30.1439	25661	9.58291	100	OK	24551	10.7203
BURSTSTART	2016-09-23 14:50:04	20222	29.9526	22931	8.56629	100	OK	24681	10.7934		BURSTSTART	2016-09-23 14:53:04	20127	30.1422	44131	16.6287	100	OK	24551	10.7203
BURSTSTART	2016-09-23 14:55:04	20223	29.9509	14509	5.35355	100	OK	24682	10.7939		BURSTSTART	2016-09-23 14:58:04	20126	30.1439	34841	13.0848	100	OK	24552	10.7207
BURSTSTART	2016-09-23 15:00:04	20221	29.9543	28041	10.5156	100	OK	24683	10.7943		BURSTSTART	2016-09-23 15:03:04	20116	30.1607	35055	13.1664	100	OK	24549	10.7195
BURSTSTART	2016-09-23 15:05:04	20221	29.9543	14128	5.20821	100	OK	24683	10.7943		BURSTSTART	2016-09-23 15:08:04	20111	30.169	37863	14.2376	100	OK	24548	10.719
BURSTSTART	2016-09-23 15:10:04	20216	29.9626	12323	4.51966	100	OK	24684	10.7947		BURSTSTART	2016-09-23 15:13:04	20109	30.1724	33816	12.6938	100	OK	24549	10.7195
BURSTSTART	2016-09-23 15:15:04	20214	29.966	11331	4.14124	100	OK	24684	10.7947		BURSTSTART	2016-09-23 15:18:04	20111	30.169	28692	10.7391	100	OK	24548	10.719
BURSTSTART	2016-09-23 15:20:04	20212	29.9693	6897	2.4498	100	OK	24684	10.7947		BURSTSTART	2016-09-23 15:23:04	20108	30.1741	32742	12.2841	100	OK	24548	10.719
BURSTSTART	2016-09-23 15:25:04	20212	29.9693	8437	3.03726	100	OK	24683	10.7943		BURSTSTART	2016-09-23 15:28:04	20103	30.1825	8467	15.11	20	OK	24538	10.7149
BURSTSTART	2016-09-23 15:30:04	20214	29.966	9237	3.34244	100	OK	24683	10.7943		BURSTSTART	2016-09-23 15:33:04	20095	30.1959	7171	12.6381	20	OK	24536	10.714
BURSTSTART	2016-09-23 15:35:04	20212	29.9693	7655	2.73895	100	OK	24683	10.7943		BURSTSTART	2016-09-23 15:38:04	20089	30.206	26262	9.81217	100	OK	24546	10.7182
BURSTSTART	2016-09-23 15:40:04	20211	29.971	14274	5.2639	100	OK	24684	10.7947		BURSTSTART	2016-09-23 15:43:04	20092	30.2009	38335	14.4177	100	OK	24545	10.7178
BURSTSTART	2016-09-23 15:45:04	20211	29.971	10267	3.73535	100	OK	24684	10.7947		BURSTSTART	2016-09-23 15:48:04	20101	30.1858	39045	14.6885	100	OK	24547	10.7186
BURSTSTART	2016-09-23 15:50:04	20214	29.966	10842	3.9547	100	OK	24684	10.7947		BURSTSTART	2016-09-23 15:53:04	20095	30.1959	35844	13.4674	100	OK	24547	10.7186
BURSTSTART	2016-09-23 15:55:04	20218	29.9593	4858	1.67198	100	OK	24686	10.7955		BURSTSTART	2016-09-23 15:58:04	20094	30.1976	29585	55.3894	20	OK	24538	10.7149
BURSTSTART	2016-09-23 16:00:04	20224	29.9492	13307	4.89502	100	OK	24683	10.7943		BURSTSTART	2016-09-23 16:03:04	20090	30.2043	25562	9.54514	100	OK	24548	10.719
BURSTSTART	2016-09-23 16:05:04	20226	29.9459	6808	2.41585	100	OK	24682	10.7939		BURSTSTART	2016-09-23 16:08:04	20095	30.1959	29298	10.9703	100	OK	24546	10.7182
BURSTSTART	2016-09-23 16:10:04	20223	29.9509	6624	2.34566	100	OK	24682	10.7939		BURSTSTART	2016-09-23 16:13:04	20103	30.1825	20196	7.49817	100	OK	24546	10.7182
BURSTSTART	2016-09-23 16:15:04	20226	29.9459	5481	1.90964	100	OK	24683	10.7943		BURSTSTART	2016-09-23 16:18:04	20106	30.1774	17362	6.41709	100	OK	24547	10.7186
BURSTSTART	2016-09-23 16:20:04	20231	29.9375	6308	2.22511	100	OK	24682	10.7939		BURSTSTART	2016-09-23 16:23:04	20109	30.1724	26655	9.96209	100	OK	24547	10.7186
BURSTSTART	2016-09-23 16:25:04	20233	29.9342	10132	3.68386	100	OK	24681	10.7934		BURSTSTART	2016-09-23 16:28:04	20119	30.1556	23519	8.7658	100	OK	24548	10.719
BURSTSTART	2016-09-23 16:30:04	20238	29.9258	7091	2.5238	100	OK	24680	10.793		BURSTSTART	2016-09-23 16:33:04	20137	30.1254	35797	13.4495	100	OK	24548	10.719
BURSTSTART	2016-09-23 16:35:04	20239	29.9241	18094	6.72112	100	OK	24680	10.793		BURSTSTART	2016-09-23 16:38:04	20144	30.1137	15918	5.86625	100	OK	24554	10.7216
BURSTSTART	2016-09-23 16:40:04	20243	29.9175	9757	3.5408	100	OK	24682	10.7939		BURSTSTART	2016-09-23 16:43:04	20147	30.1087	17381	6.42434	100	OK	24551	10.7203
BURSTSTART	2016-09-23 16:45:04	20244	29.9158	6105	2.14768	100	OK	24681	10.7934		BURSTSTART	2016-09-23 16:48:04	20152	30.1003	17890	6.6185	100	OK	24548	10.719
BURSTSTART	2016-09-23 16:50:04	20246	29.9124	4554	1.55602	100	OK	24681	10.7934		BURSTSTART	2016-09-23 16:53:04	20152	30.1003	40863	15.382	100	OK	24550	10.7199
BURSTSTART	2016-09-23 16:55:04	20243	29.9175	5569	1.94321	100	OK	24681	10.7934		BURSTSTART	2016-09-23 16:58:04	20154	30.097	18335	6.78826	100	OK	24548	10.719
BURSTSTART	2016-09-23 17:00:04	20241	29.9208	13292	4.8893	100	OK	24683	10.7943		BURSTSTART	2016-09-23 17:03:04	20151	30.102	14809	5.4432	100	OK	24548	10.719
BURSTSTART	2016-09-23 17:05:04	20236	29.9292	9200	3.32833	100	OK	24682	10.7939		BURSTSTART	2016-09-23 17:08:04	20148	30.107	20594	7.65	100	OK	24546	10.7182
BURSTSTART	2016-09-23 17:10:04	20231	29.9375	7480	2.6722	100	OK	24682	10.7939		BURSTSTART	2016-09-23 17:13:04	20149	30.1053	32683	12.2616	100	OK	24547	10.7186
BURSTSTART	2016-09-23 17:15:04	20229	29.9409	8679	3.12958	100	OK	24680	10.793		BURSTSTART	2016-09-23 17:18:04	20148	30.107	16943	6.25725	100	OK	24546	10.7182
BURSTSTART	2016-09-23 17:20:04	20228	29.9425	10359	3.77045	100	OK	24681	10.7934		BURSTSTART	2016-09-23 17:23:04	20149	30.1053	64959	24.5739	100	SAT	24538	10.7149
BURSTSTART	2016-09-23 17:25:04	20226	29.9459	6857	2.43454	100	OK	24680	10.793		BURSTSTART	2016-09-23 17:28:04	20146	30.1104	28388	10.6232	100	OK	24546	10.7182
BURSTSTART	2016-09-23 17:30:04	20226	29.9459	15001	5.54123	100	OK	24681	10.7934		BURSTSTART	2016-09-23 17:33:04	20148	30.107	15959	5.88189	100	OK	24546	10.7182
BURSTSTART	2016-09-23 17:35:04	20228	29.9425	5251	1.8219	100	OK	24681	10.7934		BURSTSTART	2016-09-23 17:38:04	20151	30.102	64935	24.5648	100	SAT	24540	10.7157
BURSTSTART	2016-09-23 17:40:04	20230	29.9392	7209	2.56882	100	OK	24682	10.7939		BURSTSTART	2016-09-23 17:43:04	20148	30.107	32098	12.0384	100	OK	24547	10.7186
BURSTSTART	2016-09-23 17:45:04	20229	29.9409	12082	4.42772	100	OK	24683	10.7943		BURSTSTART	2016-09-23 17:48:04	20151	30.102	20718	7.6973	100	OK	24547	10.7186
BURSTSTART	2016-09-23 17:50:04	20228	29.9425	8508	3.06435	100	OK	24681	10.7934		BURSTSTART	2016-09-23 17:53:04	20152	30.1003	17243	6.37169	100	OK	24545	10.7178
BURSTSTART	2016-09-23 17:55:04	20229	29.9409	9773	3.54691	100	OK	24681	10.7934		BURSTSTART	2016-09-23 17:58:04	20158	30.0903	4562	7.66183	20	OK	24535	10.7136
BURSTSTART	2016-09-23 18:00:04	20236	29.9292	13121	4.82407	100	OK	24681	10.7934		BURSTSTART	2016-09-23 18:03:04	20153	30.0986	32828	12.3169	100	OK	24546	10.7182
BURSTSTART	2016-09-23 18:05:04	20232	29.9358	7092	2.52419	100	OK	24681	10.7934		BURSTSTART	2016-09-23 18:08:04	20158	30.0903	21735	8.08526	100	OK	24469	10.686
BURSTSTART	2016-09-23 18:10:04	20238	29.9258	7274	2.59361	100	OK	24682	10.7939		BURSTSTART	2016-09-23 18:13:04	20158	30.0903	25472	9.51081	100	OK	24547	10.7186
BURSTSTART	2016-09-23 18:15:04	20239	29.9241	10486	3.8189	100	OK	24682	10.7939		BURSTSTART	2016-09-23 18:18:04	20160	30.0869	25511	9.52569	100	OK	24545	10.7178
BURSTSTART	2016-09-23 18:20:04	20242	29.9191	6214	2.18926	100	OK	24681	10.7934		BURSTSTART	2016-09-23 18:23:04	20160	30.0869	17423	6.44036	100	OK	24545	10.7178
BURSTSTART	2016-09-23 18:25:04	20239	29.9241	7841	2.80991	100	OK	24682	10.7939		BURSTSTART	2016-09-23 18:28:04	20161	30.0852	20665	7.67708	100	OK	24543	10.717
BURSTSTART	2016-09-23 18:30:04	20242	29.9191	16054	5.94292	100	OK	24658	10.7838		BURSTSTART	2016-09-23 18:33:04	20164	30.0802	30953	11.6016	100	OK	24543	10.717
BURSTSTART	2016-09-23 18:35:04	20243	29.9175	7597	2.71683	100	OK	24681	10.7934		BURSTSTART	2016-09-23 18:38:04	20168	30.0735	6237	10.8566	20	OK	24537	10.7144
BURSTSTART	2016-09-23 18:40:04	20250	29.9058	7001	2.48947	100	OK	24681	10.7934		BURSTSTART	2016-09-23 18:43:04	20168	30.0735	21344	7.9361	100	OK	24549	10.7195
BURSTSTART	2016-09-23 18:45:04	20249	29.9074	8069	2.89688	100	OK	24682	10.7939		BURSTSTART	2016-09-23 18:48:04	20169	30.0718	20523	7.62291	100	OK	24546	10.7182
BURSTSTART	2016-09-23 18:50:04	20249	29.9074	15397	5.69229	100	OK	24682	10.7939		BURSTSTART	2016-09-23 18:53:04	20167	30.0752	57969	21.9074	100	OK	24549	10.7195
BURSTSTART	2016-09-23 18:55:04	20250	29.9058	9915	3.60108	100	OK	24681	10.7934		BURSTSTART	2016-09-23 18:58:04	20171	30.0685	12369	22.5525	20	OK	24535	10.7136
BURSTSTART	2016-09-23 19:00:04	20249	29.9074	6548	2.31667	100	OK	24682	10.7939		BURSTSTART	2016-09-23 19:03:04	20168	30.0735	21285	7.91359	100	OK	24544	10.7174
BURSTSTART	2016-09-23 19:05:04	20252	29.9024	6842	2.42882	100	OK	24681	10.7934		BURSTSTART	2016-09-23 19:08:04	20170	30.0702	20569	7.64046	100	OK	24548	10.719
BURSTSTART	2016-09-23 19:10:04	20254	29.8991	6443	2.27661	100	OK	24682	10.7939		BURSTSTART	2016-09-23 19:13:04	20171	30.0685	31742	11.9026	100	OK	24545	10.7178
BURSTSTART	2016-09-23 19:15:04	20254	29.8991	15089	5.5748	100	OK	24682	10.7939		BURSTSTART	2016-09-23 19:18:04	20171	30.0685	22208	8.26569	100	OK	24546	10.7182
BURSTSTART	2016-09-23 19:20:04	20253	29.9007	7638	2.73247	100	OK	24681	10.7934		BURSTSTART	2016-09-23 19:23:04	20171	30.0685	25692	9.59473	100	OK	24546	10.7182
BURSTSTART	2016-09-23 19:25:04	20254	29.8991	7778	2.78587	100	OK	24681	10.7934		BURSTSTART	2016-09-23 19:28:04	20176	30.0601	25582	9.55277	100	OK	24547	10.7186
BURSTSTART	2016-09-23 19:30:04	20254	29.8991	9218	3.33519	100	OK	24681	10.7934		BURSTSTART	2016-09-23 19:33:04	20174	30.0635	18910	7.0076	100	OK	24545	10.7178
BURSTSTART	2016-09-23 19:35:04	20252	29.9024	8381	3.0159	100	OK	24681	10.7934		BURSTSTART	2016-09-23 19:38:04	20174	30.0635	20489	7.60994	100	OK	24548	10.719
BURSTSTART	2016-09-23 19:40:04	20251	29.9041	5998	2.10686	100	OK	24681	10.7934		BURSTSTART	2016-09-23 19:43:04	20173	30.0651	24587	9.17321	100	OK	24546	10.7182
BURSTSTART	2016-09-23 19:45:04	20251	29.9041	11479	4.1977	100	OK	24680	10.793		BURSTSTART	2016-09-23 19:48:04	20174	30.0635	26648	9.95942	100	OK	24545	10.7178
BURSTSTART	2016-09-23 19:50:04	20249	29.9074	8974	3.24211	100	OK	24682	10.7939		BURSTSTART	2016-09-23 19:53:04	20176	30.0601	21489	7.99141	100	OK	24550	10.7199
BURSTSTART	2016-09-23 19:55:04	20248	29.9091	10762	3.92418	100	OK	24681	10.7934		BURSTSTART	2016-09-23 19:58:04	20179	30.0551	11297	20.5078	20	OK	24538	10.7149
BURSTSTART	2016-09-23 20:00:04	20249	29.9074	14494	5.34783	100	OK	24681	10.7934		BURSTSTART	2016-09-23 20:03:04	20176	30.0601	20987	7.79992	100	OK	24545	10.7178
BURSTSTART	2016-09-23 20:05:04	20251	29.9041	8897	3.21274	100	OK	24681	10.7934		BURSTSTART	2016-09-23 20:08:04	20175	30.0618	31769	11.9129	100	OK	24547	10.7186
BURSTSTART	2016-09-23 20:10:04	20251	29.9041	7898	2.83165	100	OK	24681	10.7934		BURSTSTART	2016-09-23 20:13:04	20175	30.0618	34830	13.0806	100	OK	24544	10.7174
BURSTSTART	2016-09-23 20:15:04	20250	29.9058	7823	2.80304	100	OK	24682	10.7939		BURSTSTART	2016-09-23 20:18:04	20175	30.0618	27317	10.2146	100	OK	24544	10.7174
BURSTSTART	2016-09-23 20:20:04	20252	29.9024	7154	2.54784	100	OK	24681	10.7934		BURSTSTART	2016-09-23 20:23:04	20176	30.0601	65006	24.5918	100	SAT	24535	10.7136
BURSTSTART	2016-09-23 20:25:04	20252	29.9024	4590	1.56975	100	OK	24681	10.7934		BURSTSTART	2016-09-23 20:28:04	20178	30.0568	41973	15.8054	100	OK	24550	10.7199
BURSTSTART	2016-09-23 20:30:04	20252	29.9024	14270	5.26238	100	OK	24681	10.7934		BURSTSTART	2016-09-23 20:33:04	20178	30.0568	24567	9.16558	100	OK	24543	10.717
BURSTSTART	2016-09-23 20:35:04	20249	29.9074	7531	2.69165	100	OK	24681	10.7934		BURSTSTART	2016-09-23 20:38:04	20182	30.0501	22068	8.21229	100	OK	24545	10.7178
BURSTSTART	2016-09-23 20:40:04	20249	29.9074	10354	3.76854	100	OK	24682	10.7939		BURSTSTART	2016-09-23 20:43:04	20182	30.0501	30586	11.4616	100	OK	24548	10.719
BURSTSTART	2016-09-23 20:45:04	20249	29.9074	7116	2.53334	100	OK	24682	10.7939		BURSTSTART	2016-09-23 20:48:04	20181	30.0517	20369	7.56417	100	OK	24546	10.7182
BURSTSTART	2016-09-23 20:50:04	20253	29.9007	15279	5.64728	100	OK	24682	10.7939		BURSTSTART	2016-09-23 20:53:04	20185	30.0451	23325	8.69179	100	OK	24545	10.7178
BURSTSTART	2016-09-23 20:55:04	20253	29.9007	16213	6.00357	100	OK	24681	10.7934		BURSTSTART	2016-09-23 20:58:04	20182	30.0501	22959	8.55218	100	OK	24545	10.7178
BURSTSTART	2016-09-23 21:00:04	20253	29.9007	10759	3.92304	100	OK	24680	10.793		BURSTSTART	2016-09-23 21:03:04	20185	30.0451	65007	24.5922	100	SAT	24538	10.7149
BURSTSTART	2016-09-23 21:05:04	20256	29.8957	5877	2.0607	100	OK	24682	10.7939		BURSTSTART	2016-09-23 21:08:04	20185	30.0451	26655	9.96209	100	OK	24544	10.7174
BURSTSTART	2016-09-23 21:10:04	20253	29.9007	8111	2.9129	100	OK	24681	10.7934		BURSTSTART	2016-09-23 21:13:04	20183	30.0484	21080	7.83539	100	OK	24546	10.7182
BURSTSTART	2016-09-23 21:15:04	20256	29.8957	6086	2.14043	100	OK	24682	10.7939		BURSTSTART	2016-09-23 21:18:04	20184	30.0467	17159	6.33965	100	OK	24544	10.7174
BURSTSTART	2016-09-23 21:20:04	20255	29.8974	9429	3.41568	100	OK	24681	10.7934		BURSTSTART	2016-09-23 21:23:04	20185	30.0451	19199	7.11785	100	OK	24547	10.7186
BURSTSTART	2016-09-23 21:25:04	20258	29.8924	4902	1.68877	100	OK	24682	10.7939		BURSTSTART	2016-09-23 21:28:04	20188	30.04	22949	8.54836	100	OK	24547	10.7186
BURSTSTART	2016-09-23 21:30:04	20257	29.8941	6100	2.14577	100	OK	24681	10.7934		BURSTSTART	2016-09-23 21:33:04	20183	30.0484	19400	7.19452	100	OK	24546	10.7182
BURSTSTART	2016-09-23 21:35:04	20258	29.8924	6849	2.43149	100	OK	24680	10.793		BURSTSTART	2016-09-23 21:38:04	20185	30.0451	25595	9.55773	100	OK	24540	10.7157
BURSTSTART	2016-09-23 21:40:04	20256	29.8957	6429	2.27127	100	OK	24679	10.7926		BURSTSTART	2016-09-23 21:43:04	20187	30.0417	19228	7.12891	100	OK	24548	10.719
BURSTSTART	2016-09-23 21:45:04	20256	29.8957	6065	2.13242	100	OK	24680	10.793		BURSTSTART	2016-09-23 21:48:04	20184	30.0467	25569	9.54781	100	OK	24545	10.7178
BURSTSTART	2016-09-23 21:50:04	20259	29.8907	5993	2.10495	100	OK	24682	10.7939		BURSTSTART	2016-09-23 21:53:04	20189	30.0384	25718	9.60465	100	OK	24542	10.7165
BURSTSTART	2016-09-23 21:55:04	20260	29.889	12374	4.53911	100	OK	24679	10.7926		BURSTSTART	2016-09-23 21:58:04	20190	30.0367	4865	8.23975	20	OK	24535	10.7136
BURSTSTART	2016-09-23 22:00:04	20261	29.8874	6060	2.13051	100	OK	24679	10.7926		BURSTSTART	2016-09-23 22:03:04	20187	30.0417	17518	6.4766	100	OK	24545	10.7178
BURSTSTART	2016-09-23 22:05:04	20263	29.884	7779	2.78626	100	OK	24679	10.7926		BURSTSTART	2016-09-23 22:08:04	20189	30.0384	17458	6.45371	100	OK	24542	10.7165
BURSTSTART	2016-09-23 22:10:04	20267	29.8773	9431	3.41644	100	OK	24681	10.7934		BURSTSTART	2016-09-23 22:13:04	20191	30.035	29881	11.1927	100	OK	24544	10.7174
BURSTSTART	2016-09-23 22:15:04	20273	29.8673	6939	2.46582	100	OK	24680	10.793		BURSTSTART	2016-09-23 22:18:04	20193	30.0317	20427	7.58629	100	OK	24544	10.7174
BURSTSTART	2016-09-23 22:20:04	20274	29.8656	6961	2.47421	100	OK	24681	10.7934		BURSTSTART	2016-09-23 22:23:04	20194	30.03	20528	7.62482	100	OK	24547	10.7186
BURSTSTART	2016-09-23 22:25:04	20276	29.8623	6045	2.12479	100	OK	24678	10.7922		BURSTSTART	2016-09-23 22:28:04	20191	30.035	25580	9.55201	100	OK	24544	10.7174
BURSTSTART	2016-09-23 22:30:04	20276	29.8623	6135	2.15912	100	OK	24682	10.7939		BURSTSTART	2016-09-23 22:33:04	20190	30.0367	21225	7.89071	100	OK	24547	10.7186
BURSTSTART	2016-09-23 22:35:04	20272	29.869	6030	2.11907	100	OK	24679	10.7926		BURSTSTART	2016-09-23 22:38:04	20192	30.0333	20615	7.65801	100	OK	24469	10.686
BURSTSTART	2016-09-23 22:40:04	20274	29.8656	6277	2.21329	100	OK	24680	10.793		BURSTSTART	2016-09-23 22:43:04	20193	30.0317	21393	7.95479	100	OK	24547	10.7186
BURSTSTART	2016-09-23 22:45:04	20276	29.8623	5551	1.93634	100	OK	24683	10.7943		BURSTSTART	2016-09-23 22:48:04	20196	30.0266	24070	8.97599	100	OK	24546	10.7182
BURSTSTART	2016-09-23 22:50:04	20274	29.8656	5726	2.0031	100	OK	24677	10.7917		BURSTSTART	2016-09-23 22:53:04	20196	30.0266	22194	8.26035	100	OK	24545	10.7178
BURSTSTART	2016-09-23 22:55:04	20276	29.8623	6834	2.42577	100	OK	24679	10.7926		BURSTSTART	2016-09-23 22:58:04	20197	30.025	18405	6.81496	100	OK	24544	10.7174
BURSTSTART	2016-09-23 23:00:04	20278	29.859	5025	1.73569	100	OK	24655	10.7825		BURSTSTART	2016-09-23 23:03:04	20196	30.0266	18786	6.9603	100	OK	24546	10.7182
BURSTSTART	2016-09-23 23:05:04	20279	29.8573	8900	3.21388	100	OK	24677	10.7917		BURSTSTART	2016-09-23 23:08:04	20202	30.0166	15745	5.80025	100	OK	24546	10.7182
BURSTSTART	2016-09-23 23:10:04	20277	29.8606	7205	2.56729	100	OK	24678	10.7922		BURSTSTART	2016-09-23 23:13:04	20202	30.0166	20691	7.687	100	OK	24545	10.7178
BURSTSTART	2016-09-23 23:15:04	20277	29.8606	5366	1.86577	100	OK	24678	10.7922		BURSTSTART	2016-09-23 23:18:04	20204	30.0133	18552	6.87104	100	OK	24545	10.7178
BURSTSTART	2016-09-23 23:20:04	20277	29.8606	7771	2.78321	100	OK	24676	10.7913		BURSTSTART	2016-09-23 23:23:04	20207	30.0082	17359	6.41594	100	OK	24544	10.7174
BURSTSTART	2016-09-23 23:25:04	20279	29.8573	8492	3.05824	100	OK	24679	10.7926		BURSTSTART	2016-09-23 23:28:04	20211	30.0016	19052	7.06177	100	OK	24543	10.717
BURSTSTART	2016-09-23 23:30:04	20280	29.8556	11370	4.15612	100	OK	24679	10.7926		BURSTSTART	2016-09-23 23:33:04	20211	30.0016	18469	6.83938	100	OK	24543	10.717
BURSTSTART	2016-09-23 23:35:04	20281	29.854	7148	2.54555	100	OK	24676	10.7913		BURSTSTART	2016-09-23 23:38:04	20214	29.9965	19053	7.06215	100	OK	24545	10.7178
BURSTSTART	2016-09-23 23:40:04	20284	29.8489	6634	2.34947	100	OK	24675	10.7909		BURSTSTART	2016-09-23 23:43:04	20213	29.9982	21060	7.82776	100	OK	24546	10.7182
BURSTSTART	2016-09-23 23:45:04	20281	29.854	8081	2.90146	100	OK	24677	10.7917		BURSTSTART	2016-09-23 23:48:04	20213	29.9982	19117	7.08657	100	OK	24546	10.7182
BURSTSTART	2016-09-23 23:50:04	20281	29.854	5027	1.73645	100	OK	24676	10.7913		BURSTSTART	2016-09-23 23:53:04	20215	29.9949	17213	6.36025	100	OK	24547	10.7186
BURSTSTART	2016-09-23 23:55:04	20280	29.8556	4928	1.69869	100	OK	24677	10.7917		BURSTSTART	2016-09-23 23:58:04	20220	29.9865	13745	5.03731	100	OK	24546	10.7182
BURSTSTART	2016-09-24 00:00:04	20282	29.8523	4874	1.67809	100	OK	24675	10.7909		BURSTSTART	2016-09-24 00:03:04	20225	29.9782	16435	6.06346	100	OK	24542	10.7165
BURSTSTART	2016-09-24 00:05:04	20280	29.8556	5146	1.78185	100	OK	24675	10.7909		BURSTSTART	2016-09-24 00:08:04	20226	29.9765	20897	7.76558	100	OK	24545	10.7178
BURSTSTART	2016-09-24 00:10:04	20278	29.859	7687	2.75116	100	OK	24678	10.7922		BURSTSTART	2016-09-24 00:13:04	20229	29.9715	17563	6.49376	100	OK	24546	10.7182
BURSTSTART	2016-09-24 00:15:04	20278	29.859	4709	1.61514	100	OK	24679	10.7926		BURSTSTART	2016-09-24 00:18:04	20229	29.9715	14772	5.42908	100	OK	24548	10.719
BURSTSTART	2016-09-24 00:20:04	20276	29.8623	3895	1.30463	100	OK	24678	10.7922		BURSTSTART	2016-09-24 00:23:04	20225	29.9782	22125	8.23403	100	OK	24543	10.717
BURSTSTART	2016-09-24 00:25:04	20276	29.8623	6284	2.21596	100	OK	24680	10.793		BURSTSTART	2016-09-24 00:28:04	20226	29.9765	18403	6.8142	100	OK	24544	10.7174
BURSTSTART	2016-09-24 00:30:04	20274	29.8656	4752	1.63155	100	OK	24677	10.7917		BURSTSTART	2016-09-24 00:33:04	20224	29.9798	16255	5.9948	100	OK	24546	10.7182
BURSTSTART	2016-09-24 00:35:04	20271	29.8707	5079	1.75629	100	OK	24675	10.7909		BURSTSTART	2016-09-24 00:38:04	20225	29.9782	20481	7.60689	100	OK	24542	10.7165
BURSTSTART	2016-09-24 00:40:04	20269	29.874	6477	2.28958	100	OK	24676	10.7913		BURSTSTART	2016-09-24 00:43:04	20222	29.9832	28480	10.6583	100	OK	24542	10.7165
BURSTSTART	2016-09-24 00:45:04	20268	29.8757	11252	4.1111	100	OK	24677	10.7917		BURSTSTART	2016-09-24 00:48:04	20220	29.9865	31581	11.8412	100	OK	24542	10.7165
BURSTSTART	2016-09-24 00:50:04	20265	29.8807	6862	2.43645	100	OK	24678	10.7922		BURSTSTART	2016-09-24 00:53:04	20222	29.9832	15280	5.62287	100	OK	24542	10.7165
BURSTSTART	2016-09-24 00:55:04	20266	29.879	5571	1.94397	100	OK	24677	10.7917		BURSTSTART	2016-09-24 00:58:04	20225	29.9782	13774	5.04837	100	OK	24540	10.7157
BURSTSTART	2016-09-24 01:00:04	20265	29.8807	6124	2.15492	100	OK	24677	10.7917		BURSTSTART	2016-09-24 01:03:04	20224	29.9798	17482	6.46286	100	OK	24535	10.7136
BURSTSTART	2016-09-24 01:05:04	20263	29.884	7157	2.54898	100	OK	24677	10.7917		BURSTSTART	2016-09-24 01:08:04	20226	29.9765	15926	5.8693	100	OK	24538	10.7149
BURSTSTART	2016-09-24 01:10:04	20261	29.8874	6914	2.45628	100	OK	24679	10.7926		BURSTSTART	2016-09-24 01:13:04	20225	29.9782	16112	5.94025	100	OK	24542	10.7165
BURSTSTART	2016-09-24 01:15:04	20262	29.8857	4937	1.70212	100	OK	24680	10.793		BURSTSTART	2016-09-24 01:18:04	20223	29.9815	24239	9.04046	100	OK	24543	10.717
BURSTSTART	2016-09-24 01:20:04	20262	29.8857	5106	1.76659	100	OK	24677	10.7917		BURSTSTART	2016-09-24 01:23:04	20223	29.9815	20909	7.77016	100	OK	24540	10.7157
BURSTSTART	2016-09-24 01:25:04	20261	29.8874	4823	1.65863	100	OK	24679	10.7926		BURSTSTART	2016-09-24 01:28:04	20222	29.9832	16827	6.213	100	OK	24543	10.717
BURSTSTART	2016-09-24 01:30:04	20260	29.889	4371	1.48621	100	OK	24679	10.7926		BURSTSTART	2016-09-24 01:33:04	20224	29.9798	29612	11.0901	100	OK	24540	10.7157
BURSTSTART	2016-09-24 01:35:04	20262	29.8857	4352	1.47896	100	OK	24678	10.7922		BURSTSTART	2016-09-24 01:38:04	20223	29.9815	17606	6.51017	100	OK	24541	10.7161
BURSTSTART	2016-09-24 01:40:04	20261	29.8874	3981	1.33743	100	OK	24677	10.7917		BURSTSTART	2016-09-24 01:43:04	20226	29.9765	53824	20.3262	100	OK	24543	10.717
BURSTSTART	2016-09-24 01:45:04	20261	29.8874	5115	1.77002	100	OK	24678	10.7922		BURSTSTART	2016-09-24 01:48:04	20224	29.9798	13321	4.87557	100	OK	24544	10.7174
BURSTSTART	2016-09-24 01:50:04	20261	29.8874	3936	1.32027	100	OK	24679	10.7926		BURSTSTART	2016-09-24 01:53:04	20226	29.9765	19014	7.04728	100	OK	24546	10.7182
BURSTSTART	2016-09-24 01:55:04	20262	29.8857	3352	1.09749	100	OK	24679	10.7926		BURSTSTART	2016-09-24 01:58:04	20225	29.9782	18357	6.79665	100	OK	24544	10.7174
BURSTSTART	2016-09-24 02:00:04	20262	29.8857	3749	1.24893	100	OK	24680	10.793		BURSTSTART	2016-09-24 02:03:04	20226	29.9765	35312	13.2645	100	OK	24544	10.7174
BURSTSTART	2016-09-24 02:05:04	20262	29.8857	3610	1.19591	100	OK	24681	10.7934		BURSTSTART	2016-09-24 02:08:04	20227	29.9748	61337	23.1922	100	OK	24542	10.7165
BURSTSTART	2016-09-24 02:10:04	20261	29.8874	4774	1.63994	100	OK	24679	10.7926		BURSTSTART	2016-09-24 02:13:04	20227	29.9748	18767	6.95305	100	OK	24540	10.7157
BURSTSTART	2016-09-24 02:15:04	20261	29.8874	3886	1.30119	100	OK	24679	10.7926		BURSTSTART	2016-09-24 02:18:04	20229	29.9715	22424	8.34809	100	OK	24544	10.7174
BURSTSTART	2016-09-24 02:20:04	20260	29.889	4549	1.55411	100	OK	24678	10.7922		BURSTSTART	2016-09-24 02:23:04	20230	29.9698	16105	5.93758	100	OK	24544	10.7174
BURSTSTART	2016-09-24 02:25:04	20260	29.889	4768	1.63765	100	OK	24680	10.793		BURSTSTART	2016-09-24 02:28:04	20230	29.9698	15591	5.74151	100	OK	24544	10.7174
BURSTSTART	2016-09-24 02:30:04	20261	29.8874	8274	2.97508	100	OK	24679	10.7926		BURSTSTART	2016-09-24 02:33:04	20229	29.9715	19385	7.1888	100	OK	24540	10.7157
BURSTSTART	2016-09-24 02:35:04	20260	29.889	5896	2.06795	100	OK	24681	10.7934		BURSTSTART	2016-09-24 02:38:04	20231	29.9681	15410	5.67246	100	OK	24538	10.7149
BURSTSTART	2016-09-24 02:40:04	20261	29.8874	4276	1.44997	100	OK	24678	10.7922		BURSTSTART	2016-09-24 02:43:04	20231	29.9681	14330	5.26047	100	OK	24538	10.7149
BURSTSTART	2016-09-24 02:45:04	20262	29.8857	5117	1.77078	100	OK	24678	10.7922		BURSTSTART	2016-09-24 02:48:04	20233	29.9648	14139	5.18761	100	OK	24540	10.7157
BURSTSTART	2016-09-24 02:50:04	20260	29.889	5738	2.00768	100	OK	24676	10.7913		BURSTSTART	2016-09-24 02:53:04	20231	29.9681	14339	5.2639	100	OK	24541	10.7161
BURSTSTART	2016-09-24 02:55:04	20262	29.8857	4079	1.37482	100	OK	24677	10.7917		BURSTSTART	2016-09-24 02:58:04	20233	29.9648	17340	6.4087	100	OK	24542	10.7165
BURSTSTART	2016-09-24 03:00:04	20262	29.8857	4012	1.34926	100	OK	24679	10.7926		BURSTSTART	2016-09-24 03:03:04	20238	29.9564	16225	5.98336	100	OK	24540	10.7157
BURSTSTART	2016-09-24 03:05:04	20260	29.889	4082	1.37596	100	OK	24683	10.7943		BURSTSTART	2016-09-24 03:08:04	20238	29.9564	11780	4.28772	100	OK	24540	10.7157
BURSTSTART	2016-09-24 03:10:04	20261	29.8874	5075	1.75476	100	OK	24678	10.7922		BURSTSTART	2016-09-24 03:13:04	20241	29.9514	12952	4.73481	100	OK	24542	10.7165
BURSTSTART	2016-09-24 03:15:04	20262	29.8857	5981	2.10037	100	OK	24678	10.7922		BURSTSTART	2016-09-24 03:18:04	20243	29.9481	11288	4.10004	100	OK	24541	10.7161
BURSTSTART	2016-09-24 03:20:04	20268	29.8757	4147	1.40076	100	OK	24680	10.793		BURSTSTART	2016-09-24 03:23:04	20244	29.9464	11032	4.00238	100	OK	24541	10.7161
BURSTSTART	2016-09-24 03:25:04	20266	29.879	5024	1.73531	100	OK	24679	10.7926		BURSTSTART	2016-09-24 03:28:04	20242	29.9497	13228	4.84009	100	OK	24539	10.7153
BURSTSTART	2016-09-24 03:30:04	20264	29.8824	7120	2.53487	100	OK	24680	10.793		BURSTSTART	2016-09-24 03:33:04	20241	29.9514	14563	5.34935	100	OK	24540	10.7157
BURSTSTART	2016-09-24 03:35:04	20265	29.8807	5052	1.74599	100	OK	24681	10.7934		BURSTSTART	2016-09-24 03:38:04	20241	29.9514	12788	4.67224	100	OK	24538	10.7149
BURSTSTART	2016-09-24 03:40:04	20266	29.879	4037	1.3588	100	OK	24681	10.7934		BURSTSTART	2016-09-24 03:43:04	20246	29.9431	9969	3.59688	100	OK	24537	10.7144
BURSTSTART	2016-09-24 03:45:04	20268	29.8757	9319	3.37372	100	OK	24678	10.7922		BURSTSTART	2016-09-24 03:48:04	20243	29.9481	18429	6.82412	100	OK	24539	10.7153
BURSTSTART	2016-09-24 03:50:04	20271	29.8707	4006	1.34697	100	OK	24682	10.7939		BURSTSTART	2016-09-24 03:53:04	20245	29.9447	12277	4.47731	100	OK	24539	10.7153
BURSTSTART	2016-09-24 03:55:04	20271	29.8707	7312	2.60811	100	OK	24680	10.793		BURSTSTART	2016-09-24 03:58:04	20242	29.9497	12231	4.45977	100	OK	24539	10.7153
BURSTSTART	2016-09-24 04:00:04	20272	29.869	4898	1.68724	100	OK	24680	10.793		BURSTSTART	2016-09-24 04:03:04	20243	29.9481	10617	3.84407	100	OK	24540	10.7157
BURSTSTART	2016-09-24 04:05:04	20273	29.8673	6145	2.16294	100	OK	24680	10.793		BURSTSTART	2016-09-24 04:08:04	20247	29.9414	5115	8.71659	20	OK	24532	10.7123
BURSTSTART	2016-09-24 04:10:04	20276	29.8623	4008	1.34773	100	OK	24680	10.793		BURSTSTART	2016-09-24 04:13:04	20240	29.9531	18657	6.91109	100	OK	24535	10.7136
BURSTSTART	2016-09-24 04:15:04	20278	29.859	4909	1.69144	100	OK	24682	10.7939		BURSTSTART	2016-09-24 04:18:04	20241	29.9514	17593	6.50521	100	OK	24538	10.7149
BURSTSTART	2016-09-24 04:20:04	20274	29.8656	3375	1.10626	100	OK	24680	10.793		BURSTSTART	2016-09-24 04:23:04	20244	29.9464	17343	6.40984	100	OK	24539	10.7153
BURSTSTART	2016-09-24 04:25:04	20276	29.8623	4052	1.36452	100	OK	24679	10.7926		BURSTSTART	2016-09-24 04:28:04	20240	29.9531	12525	4.57192	100	OK	24539	10.7153
BURSTSTART	2016-09-24 04:30:04	20276	29.8623	4369	1.48544	100	OK	24682	10.7939		BURSTSTART	2016-09-24 04:33:04	20242	29.9497	14707	5.40428	100	OK	24536	10.714
BURSTSTART	2016-09-24 04:35:04	20276	29.8623	5378	1.87035	100	OK	24679	10.7926		BURSTSTART	2016-09-24 04:38:04	20242	29.9497	13016	4.75922	100	OK	24538	10.7149
BURSTSTART	2016-09-24 04:40:04	20277	29.8606	3131	1.01318	100	OK	24680	10.793		BURSTSTART	2016-09-24 04:43:04	20240	29.9531	13275	4.85802	100	OK	24541	10.7161
BURSTSTART	2016-09-24 04:45:04	20276	29.8623	4609	1.577	100	OK	24680	10.793		BURSTSTART	2016-09-24 04:48:04	20241	29.9514	12319	4.49334	100	OK	24538	10.7149
BURSTSTART	2016-09-24 04:50:04	20277	29.8606	3013	0.968171	100	OK	24678	10.7922		BURSTSTART	2016-09-24 04:53:04	20240	29.9531	15757	5.80483	100	OK	24538	10.7149
BURSTSTART	2016-09-24 04:55:04	20280	29.8556	3991	1.34125	100	OK	24679	10.7926		BURSTSTART	2016-09-24 04:58:04	20242	29.9497	20278	7.52945	100	OK	24534	10.7132
BURSTSTART	2016-09-24 05:00:04	20281	29.854	3351	1.09711	100	OK	24678	10.7922		BURSTSTART	2016-09-24 05:03:04	20240	29.9531	15632	5.75715	100	OK	24538	10.7149
BURSTSTART	2016-09-24 05:05:04	20281	29.854	13147	4.83399	100	OK	24682	10.7939		BURSTSTART	2016-09-24 05:08:04	20239	29.9548	12012	4.37622	100	OK	24537	10.7144
BURSTSTART	2016-09-24 05:10:04	20281	29.854	4891	1.68457	100	OK	24676	10.7913		BURSTSTART	2016-09-24 05:13:04	20237	29.9581	28665	10.7288	100	OK	24539	10.7153
BURSTSTART	2016-09-24 05:15:04	20283	29.8506	6412	2.26479	100	OK	24677	10.7917		BURSTSTART	2016-09-24 05:18:04	20238	29.9564	12313	4.49105	100	OK	24536	10.714
BURSTSTART	2016-09-24 05:20:04	20285	29.8473	3148	1.01967	100	OK	24677	10.7917		BURSTSTART	2016-09-24 05:23:04	20238	29.9564	19741	7.32461	100	OK	24536	10.714
BURSTSTART	2016-09-24 05:25:04	20287	29.8439	4325	1.46866	100	OK	24678	10.7922		BURSTSTART	2016-09-24 05:28:04	20237	29.9581	16617	6.13289	100	OK	24539	10.7153
BURSTSTART	2016-09-24 05:30:04	20287	29.8439	3508	1.157	100	OK	24678	10.7922		BURSTSTART	2016-09-24 05:33:04	20235	29.9614	22181	8.25539	100	OK	24535	10.7136
BURSTSTART	2016-09-24 05:35:04	20291	29.8373	5083	1.75781	100	OK	24679	10.7926		BURSTSTART	2016-09-24 05:38:04	20233	29.9648	16099	5.93529	100	OK	24535	10.7136
BURSTSTART	2016-09-24 05:40:04	20292	29.8356	5335	1.85394	100	OK	24678	10.7922		BURSTSTART	2016-09-24 05:43:04	20231	29.9681	15212	5.59693	100	OK	24537	10.7144
BURSTSTART	2016-09-24 05:45:04	20297	29.8272	3500	1.15395	100	OK	24679	10.7926		BURSTSTART	2016-09-24 05:48:04	20233	29.9648	15473	5.69649	100	OK	24534	10.7132
BURSTSTART	2016-09-24 05:50:04	20297	29.8272	3714	1.23558	100	OK	24677	10.7917		BURSTSTART	2016-09-24 05:53:04	20229	29.9715	16216	5.97992	100	OK	24537	10.7144
BURSTSTART	2016-09-24 05:55:04	20298	29.8256	4950	1.70708	100	OK	24678	10.7922		BURSTSTART	2016-09-24 05:58:04	20228	29.9731	15095	5.5523	100	OK	24533	10.7128
BURSTSTART	2016-09-24 06:00:04	20299	29.8239	4027	1.35498	100	OK	24678	10.7922		BURSTSTART	2016-09-24 06:03:04	20229	29.9715	19508	7.23572	100	OK	24530	10.7115
BURSTSTART	2016-09-24 06:05:04	20299	29.8239	5910	2.07329	100	OK	24678	10.7922		BURSTSTART	2016-09-24 06:08:04	20233	29.9648	23902	8.9119	100	OK	24533	10.7128
BURSTSTART	2016-09-24 06:10:04	20299	29.8239	3235	1.05286	100	OK	24678	10.7922		BURSTSTART	2016-09-24 06:13:04	20232	29.9665	21390	7.95365	100	OK	24534	10.7132
BURSTSTART	2016-09-24 06:15:04	20301	29.8206	3721	1.23825	100	OK	24678	10.7922		BURSTSTART	2016-09-24 06:18:04	20235	29.9614	37896	14.2502	100	OK	24533	10.7128
BURSTSTART	2016-09-24 06:20:04	20302	29.8189	2816	0.893021	100	OK	24676	10.7913		BURSTSTART	2016-09-24 06:23:04	20233	29.9648	21713	8.07686	100	OK	24536	10.714
BURSTSTART	2016-09-24 06:25:04	20301	29.8206	5343	1.857	100	OK	24675	10.7909		BURSTSTART	2016-09-24 06:28:04	20238	29.9564	21102	7.84379	100	OK	24534	10.7132
BURSTSTART	2016-09-24 06:30:04	20303	29.8172	4210	1.42479	100	OK	24677	10.7917		BURSTSTART	2016-09-24 06:33:04	20239	29.9548	21112	7.8476	100	OK	24537	10.7144
BURSTSTART	2016-09-24 06:35:04	20305	29.8139	4185	1.41525	100	OK	24675	10.7909		BURSTSTART	2016-09-24 06:38:04	20241	29.9514	16262	5.99747	100	OK	24537	10.7144
BURSTSTART	2016-09-24 06:40:04	20303	29.8172	2480	0.764847	100	OK	24677	10.7917		BURSTSTART	2016-09-24 06:43:04	20241	29.9514	20704	7.69196	100	OK	24535	10.7136
BURSTSTART	2016-09-24 06:45:04	20304	29.8156	4149	1.40152	100	OK	24676	10.7913		BURSTSTART	2016-09-24 06:48:04	20241	29.9514	6510	11.3773	20	OK	24527	10.7103
BURSTSTART	2016-09-24 06:50:04	20308	29.8089	4325	1.46866	100	OK	24678	10.7922		BURSTSTART	2016-09-24 06:53:04	20240	29.9531	22931	8.54149	100	OK	24539	10.7153
BURSTSTART	2016-09-24 06:55:04	20313	29.8005	3293	1.07498	100	OK	24676	10.7913		BURSTSTART	2016-09-24 06:58:04	20242	29.9497	24523	9.14879	100	OK	24533	10.7128
BURSTSTART	2016-09-24 07:00:04	20315	29.7972	3831	1.28021	100	OK	24676	10.7913		BURSTSTART	2016-09-24 07:03:04	20242	29.9497	23457	8.74215	100	OK	24533	10.7128
BURSTSTART	2016-09-24 07:05:04	20316	29.7955	5964	2.09389	100	OK	24677	10.7917		BURSTSTART	2016-09-24 07:08:04	20241	29.9514	28846	10.7979	100	OK	24534	10.7132
BURSTSTART	2016-09-24 07:10:04	20315	29.7972	4218	1.42784	100	OK	24676	10.7913		BURSTSTART	2016-09-24 07:13:04	20245	29.9447	20072	7.45087	100	OK	24533	10.7128
BURSTSTART	2016-09-24 07:15:04	20317	29.7939	3574	1.18217	100	OK	24676	10.7913		BURSTSTART	2016-09-24 07:18:04	20245	29.9447	19861	7.37038	100	OK	24533	10.7128
BURSTSTART	2016-09-24 07:20:04	20318	29.7922	3435	1.12915	100	OK	24675	10.7909		BURSTSTART	2016-09-24 07:23:04	20248	29.9397	22384	8.33283	100	OK	24535	10.7136
BURSTSTART	2016-09-24 07:25:04	20316	29.7955	4346	1.47667	100	OK	24674	10.7905		BURSTSTART	2016-09-24 07:28:04	20251	29.9347	19910	7.38907	100	OK	24534	10.7132
BURSTSTART	2016-09-24 07:30:04	20314	29.7989	3532	1.16615	100	OK	24677	10.7917		BURSTSTART	2016-09-24 07:33:04	20249	29.9381	20897	7.76558	100	OK	24459	10.6818
BURSTSTART	2016-09-24 07:35:04	20314	29.7989	4523	1.54419	100	OK	24676	10.7913		BURSTSTART	2016-09-24 07:38:04	20253	29.9314	16874	6.23093	100	OK	24540	10.7157
BURSTSTART	2016-09-24 07:40:04	20313	29.8005	4197	1.41983	100	OK	24676	10.7913		BURSTSTART	2016-09-24 07:43:04	20254	29.9297	17129	6.32821	100	OK	24536	10.714
BURSTSTART	2016-09-24 07:45:04	20312	29.8022	4219	1.42822	100	OK	24675	10.7909		BURSTSTART	2016-09-24 07:48:04	20254	29.9297	14476	5.31617	100	OK	24533	10.7128
BURSTSTART	2016-09-24 07:50:04	20311	29.8039	3876	1.29738	100	OK	24677	10.7917		BURSTSTART	2016-09-24 07:53:04	20253	29.9314	24232	9.03779	100	OK	24533	10.7128
BURSTSTART	2016-09-24 07:55:04	20312	29.8022	4218	1.42784	100	OK	24652	10.7812		BURSTSTART	2016-09-24 07:58:04	20252	29.933	29712	11.1282	100	OK	24535	10.7136
BURSTSTART	2016-09-24 08:00:04	20313	29.8005	3967	1.33209	100	OK	24675	10.7909		BURSTSTART	2016-09-24 08:03:04	20255	29.928	17040	6.29425	100	OK	24535	10.7136
BURSTSTART	2016-09-24 08:05:04	20313	29.8005	4084	1.37672	100	OK	24676	10.7913		BURSTSTART	2016-09-24 08:08:04	20252	29.933	16540	6.10352	100	OK	24533	10.7128
BURSTSTART	2016-09-24 08:10:04	20310	29.8056	4123	1.3916	100	OK	24677	10.7917		BURSTSTART	2016-09-24 08:13:04	20253	29.9314	16327	6.02227	100	OK	24532	10.7123
BURSTSTART	2016-09-24 08:15:04	20307	29.8106	5652	1.97487	100	OK	24676	10.7913		BURSTSTART	2016-09-24 08:18:04	20252	29.933	22520	8.38471	100	OK	24533	10.7128
BURSTSTART	2016-09-24 08:20:04	20308	29.8089	4324	1.46828	100	OK	24677	10.7917		BURSTSTART	2016-09-24 08:23:04	20253	29.9314	14769	5.42794	100	OK	24534	10.7132
BURSTSTART	2016-09-24 08:25:04	20312	29.8022	3973	1.33438	100	OK	24677	10.7917		BURSTSTART	2016-09-24 08:28:04	20251	29.9347	24580	9.17054	100	OK	24532	10.7123
BURSTSTART	2016-09-24 08:30:04	20314	29.7989	4856	1.67122	100	OK	24677	10.7917		BURSTSTART	2016-09-24 08:33:04	20252	29.933	15900	5.85938	100	OK	24533	10.7128
BURSTSTART	2016-09-24 08:35:04	20312	29.8022	3405	1.11771	100	OK	24676	10.7913		BURSTSTART	2016-09-24 08:38:04	20251	29.9347	16453	6.07033	100	OK	24532	10.7123
BURSTSTART	2016-09-24 08:40:04	20311	29.8039	5281	1.83335	100	OK	24676	10.7913		BURSTSTART	2016-09-24 08:43:04	20251	29.9347	21647	8.05169	100	OK	24533	10.7128
BURSTSTART	2016-09-24 08:45:04	20310	29.8056	4873	1.67771	100	OK	24676	10.7913		BURSTSTART	2016-09-24 08:48:04	20250	29.9364	18285	6.76919	100	OK	24535	10.7136
BURSTSTART	2016-09-24 08:50:04	20307	29.8106	3828	1.27907	100	OK	24676	10.7913		BURSTSTART	2016-09-24 08:53:04	20246	29.9431	13819	5.06554	100	OK	24532	10.7123
BURSTSTART	2016-09-24 08:55:04	20307	29.8106	4371	1.48621	100	OK	24678	10.7922		BURSTSTART	2016-09-24 08:58:04	20247	29.9414	15261	5.61562	100	OK	24533	10.7128
BURSTSTART	2016-09-24 09:00:04	20304	29.8156	5496	1.91536	100	OK	24679	10.7926		BURSTSTART	2016-09-24 09:03:04	20245	29.9447	17772	6.57349	100	OK	24533	10.7128
BURSTSTART	2016-09-24 09:05:04	20301	29.8206	5043	1.74256	100	OK	24679	10.7926		BURSTSTART	2016-09-24 09:08:04	20244	29.9464	24010	8.9531	100	OK	24532	10.7123
BURSTSTART	2016-09-24 09:10:04	20302	29.8189	6056	2.12898	100	OK	24675	10.7909		BURSTSTART	2016-09-24 09:13:04	20245	29.9447	20182	7.49283	100	OK	24529	10.7111
BURSTSTART	2016-09-24 09:15:04	20302	29.8189	4191	1.41754	100	OK	24678	10.7922		BURSTSTART	2016-09-24 09:18:04	20242	29.9497	25606	9.56193	100	OK	24532	10.7123
BURSTSTART	2016-09-24 09:20:04	20299	29.8239	4029	1.35574	100	OK	24676	10.7913		BURSTSTART	2016-09-24 09:23:04	20241	29.9514	17513	6.47469	100	OK	24532	10.7123
BURSTSTART	2016-09-24 09:25:04	20297	29.8272	4870	1.67656	100	OK	24676	10.7913		BURSTSTART	2016-09-24 09:28:04	20242	29.9497	15892	5.85633	100	OK	24527	10.7103
BURSTSTART	2016-09-24 09:30:04	20297	29.8272	5066	1.75133	100	OK	24678	10.7922		BURSTSTART	2016-09-24 09:33:04	20239	29.9548	15676	5.77393	100	OK	24531	10.7119
BURSTSTART	2016-09-24 09:35:04	20296	29.8289	5549	1.93558	100	OK	24676	10.7913		BURSTSTART	2016-09-24 09:38:04	20239	29.9548	16370	6.03867	100	OK	24533	10.7128
BURSTSTART	2016-09-24 09:40:04	20295	29.8306	3944	1.32332	100	OK	24678	10.7922		BURSTSTART	2016-09-24 09:43:04	20238	29.9564	16432	6.06232	100	OK	24532	10.7123
BURSTSTART	2016-09-24 09:45:04	20295	29.8306	5525	1.92642	100	OK	24678	10.7922		BURSTSTART	2016-09-24 09:48:04	20236	29.9598	19507	7.23534	100	OK	24530	10.7115
BURSTSTART	2016-09-24 09:50:04	20293	29.8339	4081	1.37558	100	OK	24679	10.7926		BURSTSTART	2016-09-24 09:53:04	20232	29.9665	40286	15.1619	100	OK	24527	10.7103
BURSTSTART	2016-09-24 09:55:04	20292	29.8356	4350	1.4782	100	OK	24677	10.7917		BURSTSTART	2016-09-24 09:58:04	20234	29.9631	18578	6.88096	100	OK	24531	10.7119
BURSTSTART	2016-09-24 10:00:04	20292	29.8356	6057	2.12936	100	OK	24677	10.7917		BURSTSTART	2016-09-24 10:03:04	20233	29.9648	15684	5.77698	100	OK	24530	10.7115
BURSTSTART	2016-09-24 10:05:04	20289	29.8406	7478	2.67143	100	OK	24678	10.7922		BURSTSTART	2016-09-24 10:08:04	20227	29.9748	16761	6.18783	100	OK	24527	10.7103
BURSTSTART	2016-09-24 10:10:04	20289	29.8406	4593	1.57089	100	OK	24677	10.7917		BURSTSTART	2016-09-24 10:13:04	20228	29.9731	25855	9.65691	100	OK	24524	10.709
BURSTSTART	2016-09-24 10:15:04	20288	29.8423	5655	1.97602	100	OK	24680	10.793		BURSTSTART	2016-09-24 10:18:04	20227	29.9748	20494	7.61185	100	OK	24525	10.7094
BURSTSTART	2016-09-24 10:20:04	20285	29.8473	5259	1.82495	100	OK	24682	10.7939		BURSTSTART	2016-09-24 10:23:04	20225	29.9782	20480	7.60651	100	OK	24527	10.7103
BURSTSTART	2016-09-24 10:25:04	20281	29.854	3132	1.01357	100	OK	24680	10.793		BURSTSTART	2016-09-24 10:28:04	20227	29.9748	15037	5.53017	100	OK	24526	10.7098
BURSTSTART	2016-09-24 10:30:04	20279	29.8573	8221	2.95487	100	OK	24681	10.7934		BURSTSTART	2016-09-24 10:33:04	20225	29.9782	15732	5.79529	100	OK	24521	10.7077
BURSTSTART	2016-09-24 10:35:04	20282	29.8523	5705	1.99509	100	OK	24679	10.7926		BURSTSTART	2016-09-24 10:38:04	20220	29.9865	13908	5.09949	100	OK	24522	10.7082
BURSTSTART	2016-09-24 10:40:04	20277	29.8606	5987	2.10266	100	OK	24681	10.7934		BURSTSTART	2016-09-24 10:43:04	20220	29.9865	14361	5.2723	100	OK	24521	10.7077
BURSTSTART	2016-09-24 10:45:04	20279	29.8573	3435	1.12915	100	OK	24680	10.793		BURSTSTART	2016-09-24 10:48:04	20222	29.9832	14337	5.26314	100	OK	24525	10.7094
BURSTSTART	2016-09-24 10:50:04	20276	29.8623	5012	1.73073	100	OK	24682	10.7939		BURSTSTART	2016-09-24 10:53:04	20219	29.9882	17543	6.48613	100	OK	24525	10.7094
BURSTSTART	2016-09-24 10:55:04	20274	29.8656	3197	1.03836	100	OK	24681	10.7934		BURSTSTART	2016-09-24 10:58:04	20216	29.9932	12265	4.47274	100	OK	24522	10.7082
BURSTSTART	2016-09-24 11:00:04	20271	29.8707	3475	1.14441	100	OK	24680	10.793		BURSTSTART	2016-09-24 11:03:04	20212	29.9999	14191	5.20745	100	OK	24526	10.7098
BURSTSTART	2016-09-24 11:05:04	20271	29.8707	3365	1.10245	100	OK	24682	10.7939		BURSTSTART	2016-09-24 11:08:04	20212	29.9999	20710	7.69425	100	OK	24526	10.7098
BURSTSTART	2016-09-24 11:10:04	20267	29.8773	4259	1.44348	100	OK	24679	10.7926		BURSTSTART	2016-09-24 11:13:04	20213	29.9982	14228	5.22156	100	OK	24521	10.7077
BURSTSTART	2016-09-24 11:15:04	20264	29.8824	4220	1.4286	100	OK	24678	10.7922		BURSTSTART	2016-09-24 11:18:04	20211	30.0016	13703	5.02129	100	OK	24517	10.7061
BURSTSTART	2016-09-24 11:20:04	20267	29.8773	9794	3.55492	100	OK	24683	10.7943		BURSTSTART	2016-09-24 11:23:04	20211	30.0016	12858	4.69895	100	OK	24526	10.7098
BURSTSTART	2016-09-24 11:25:04	20265	29.8807	4335	1.47247	100	OK	24682	10.7939		BURSTSTART	2016-09-24 11:28:04	20209	30.0049	16151	5.95513	100	OK	24522	10.7082
BURSTSTART	2016-09-24 11:30:04	20267	29.8773	4042	1.3607	100	OK	24683	10.7943		BURSTSTART	2016-09-24 11:33:04	20210	30.0032	15688	5.77851	100	OK	24519	10.7069
BURSTSTART	2016-09-24 11:35:04	20263	29.884	4670	1.60027	100	OK	24683	10.7943		BURSTSTART	2016-09-24 11:38:04	20207	30.0082	13031	4.76494	100	OK	24519	10.7069
BURSTSTART	2016-09-24 11:40:04	20263	29.884	3742	1.24626	100	OK	24682	10.7939		BURSTSTART	2016-09-24 11:43:04	20210	30.0032	15503	5.70793	100	OK	24521	10.7077
BURSTSTART	2016-09-24 11:45:04	20266	29.879	3418	1.12267	100	OK	24682	10.7939		BURSTSTART	2016-09-24 11:48:04	20209	30.0049	12320	4.49372	100	OK	24525	10.7094
BURSTSTART	2016-09-24 11:50:04	20266	29.879	4066	1.36986	100	OK	24681	10.7934		BURSTSTART	2016-09-24 11:53:04	20207	30.0082	13408	4.90876	100	OK	24522	10.7082
BURSTSTART	2016-09-24 11:55:04	20266	29.879	3494	1.15166	100	OK	24682	10.7939		BURSTSTART	2016-09-24 11:58:04	20206	30.0099	14258	5.23301	100	OK	24518	10.7065
BURSTSTART	2016-09-24 12:00:04	20269	29.874	10963	4.00086	100	OK	24681	10.7934		BURSTSTART	2016-09-24 12:03:04	20204	30.0133	18890	6.99997	100	OK	24450	10.678
BURSTSTART	2016-09-24 12:05:04	20268	29.8757	4545	1.55258	100	OK	24682	10.7939		BURSTSTART	2016-09-24 12:08:04	20197	30.025	35325	13.2694	100	OK	24522	10.7082
BURSTSTART	2016-09-24 12:10:04	20269	29.874	3790	1.26457	100	OK	24681	10.7934		BURSTSTART	2016-09-24 12:13:04	20197	30.025	21101	7.8434	100	OK	24521	10.7077
BURSTSTART	2016-09-24 12:15:04	20267	29.8773	3768	1.25618	100	OK	24682	10.7939		BURSTSTART	2016-09-24 12:18:04	20194	30.03	13959	5.11895	100	OK	24521	10.7077
BURSTSTART	2016-09-24 12:20:04	20269	29.874	5063	1.75018	100	OK	24683	10.7943		BURSTSTART	2016-09-24 12:23:04	20190	30.0367	15311	5.63469	100	OK	24518	10.7065
BURSTSTART	2016-09-24 12:25:04	20267	29.8773	4842	1.66588	100	OK	24658	10.7838		BURSTSTART	2016-09-24 12:28:04	20183	30.0484	16070	5.92423	100	OK	24518	10.7065
BURSTSTART	2016-09-24 12:30:04	20264	29.8824	4203	1.42212	100	OK	24682	10.7939		BURSTSTART	2016-09-24 12:33:04	20182	30.0501	12265	4.47274	100	OK	24516	10.7057
BURSTSTART	2016-09-24 12:35:04	20265	29.8807	3914	1.31187	100	OK	24683	10.7943		BURSTSTART	2016-09-24 12:38:04	20182	30.0501	20646	7.66984	100	OK	24515	10.7052
BURSTSTART	2016-09-24 12:40:04	20263	29.884	4850	1.66893	100	OK	24682	10.7939		BURSTSTART	2016-09-24 12:43:04	20176	30.0601	17262	6.37894	100	OK	24517	10.7061
BURSTSTART	2016-09-24 12:45:04	20263	29.884	3083	0.994874	100	OK	24683	10.7943		BURSTSTART	2016-09-24 12:48:04	20173	30.0651	18587	6.88439	100	OK	24514	10.7048
BURSTSTART	2016-09-24 12:50:04	20264	29.8824	3409	1.11923	100	OK	24682	10.7939		BURSTSTART	2016-09-24 12:53:04	20184	30.0467	25045	9.34792	100	OK	24517	10.7061
BURSTSTART	2016-09-24 12:55:04	20263	29.884	3876	1.29738	100	OK	24684	10.7947		BURSTSTART	2016-09-24 12:58:04	20185	30.0451	17145	6.33431	100	OK	24516	10.7057
BURSTSTART	2016-09-24 13:00:04	20264	29.8824	4423	1.50604	100	OK	24683	10.7943		BURSTSTART	2016-09-24 13:03:04	20187	30.0417	18357	6.79665	100	OK	24517	10.7061
BURSTSTART	2016-09-24 13:05:04	20262	29.8857	3517	1.16043	100	OK	24682	10.7939		BURSTSTART	2016-09-24 13:08:04	20186	30.0434	23009	8.57125	100	OK	24520	10.7073
BURSTSTART	2016-09-24 13:10:04	20265	29.8807	3273	1.06735	100	OK	24683	10.7943		BURSTSTART	2016-09-24 13:13:04	20184	30.0467	17479	6.46172	100	OK	24515	10.7052
BURSTSTART	2016-09-24 13:15:04	20262	29.8857	3266	1.06468	100	OK	24683	10.7943		BURSTSTART	2016-09-24 13:18:04	20184	30.0467	12365	4.51088	100	OK	24514	10.7048
BURSTSTART	2016-09-24 13:20:04	20261	29.8874	5153	1.78452	100	OK	24681	10.7934		BURSTSTART	2016-09-24 13:23:04	20189	30.0384	35848	13.4689	100	OK	24517	10.7061
BURSTSTART	2016-09-24 13:25:04	20261	29.8874	3348	1.09596	100	OK	24681	10.7934		BURSTSTART	2016-09-24 13:28:04	20192	30.0333	13808	5.06134	100	OK	24516	10.7057
BURSTSTART	2016-09-24 13:30:04	20259	29.8907	5312	1.84517	100	OK	24682	10.7939		BURSTSTART	2016-09-24 13:33:04	20195	30.0283	13820	5.06592	100	OK	24522	10.7082
BURSTSTART	2016-09-24 13:35:04	20261	29.8874	4236	1.43471	100	OK	24683	10.7943		BURSTSTART	2016-09-24 13:38:04	20200	30.02	15820	5.82886	100	OK	24517	10.7061
BURSTSTART	2016-09-24 13:40:04	20258	29.8924	3383	1.10932	100	OK	24684	10.7947		BURSTSTART	2016-09-24 13:43:04	20205	30.0116	18357	6.79665	100	OK	24515	10.7052
BURSTSTART	2016-09-24 13:45:04	20259	29.8907	4853	1.67008	100	OK	24683	10.7943		BURSTSTART	2016-09-24 13:48:04	20207	30.0082	15469	5.69496	100	OK	24519	10.7069
BURSTSTART	2016-09-24 13:50:04	20258	29.8924	4485	1.5297	100	OK	24683	10.7943		BURSTSTART	2016-09-24 13:53:04	20207	30.0082	14294	5.24674	100	OK	24518	10.7065
BURSTSTART	2016-09-24 13:55:04	20255	29.8974	3918	1.3134	100	OK	24683	10.7943		BURSTSTART	2016-09-24 13:58:04	20211	30.0016	15186	5.58701	100	OK	24521	10.7077
BURSTSTART	2016-09-24 14:00:04	20253	29.9007	3515	1.15967	100	OK	24684	10.7947		BURSTSTART	2016-09-24 14:03:04	20211	30.0016	16271	6.0009	100	OK	24520	10.7073
BURSTSTART	2016-09-24 14:05:04	20254	29.8991	4119	1.39008	100	OK	24684	10.7947		BURSTSTART	2016-09-24 14:08:04	20215	29.9949	20444	7.59278	100	OK	24519	10.7069
BURSTSTART	2016-09-24 14:10:04	20251	29.9041	3993	1.34201	100	OK	24685	10.7951		BURSTSTART	2016-09-24 14:13:04	20221	29.9848	14757	5.42336	100	OK	24522	10.7082
BURSTSTART	2016-09-24 14:15:04	20252	29.9024	3167	1.02692	100	OK	24686	10.7955		BURSTSTART	2016-09-24 14:18:04	20225	29.9782	16708	6.16761	100	OK	24518	10.7065
BURSTSTART	2016-09-24 14:20:04	20252	29.9024	3368	1.10359	100	OK	24685	10.7951		BURSTSTART	2016-09-24 14:23:04	20230	29.9698	12241	4.46358	100	OK	24519	10.7069
BURSTSTART	2016-09-24 14:25:04	20253	29.9007	3644	1.20888	100	OK	24684	10.7947		BURSTSTART	2016-09-24 14:28:04	20229	29.9715	16453	6.07033	100	OK	24518	10.7065
BURSTSTART	2016-09-24 14:30:04	20249	29.9074	34365	12.928	100	OK	24684	10.7947		BURSTSTART	2016-09-24 14:33:04	20233	29.9648	12899	4.71459	100	OK	24524	10.709
BURSTSTART	2016-09-24 14:35:04	20247	29.9108	3186	1.03417	100	OK	24686	10.7955		BURSTSTART	2016-09-24 14:38:04	20236	29.9598	14022	5.14298	100	OK	24525	10.7094
BURSTSTART	2016-09-24 14:40:04	20246	29.9124	3351	1.09711	100	OK	24684	10.7947		BURSTSTART	2016-09-24 14:43:04	20235	29.9614	18540	6.86646	100	OK	24526	10.7098
BURSTSTART	2016-09-24 14:45:04	20246	29.9124	3812	1.27296	100	OK	24684	10.7947		BURSTSTART	2016-09-24 14:48:04	20237	29.9581	28912	10.8231	100	OK	24522	10.7082
BURSTSTART	2016-09-24 14:50:04	20244	29.9158	4060	1.36757	100	OK	24685	10.7951		BURSTSTART	2016-09-24 14:53:04	20238	29.9564	15957	5.88112	100	OK	24528	10.7107
BURSTSTART	2016-09-24 14:55:04	20242	29.9191	3405	1.11771	100	OK	24684	10.7947		BURSTSTART	2016-09-24 14:58:04	20239	29.9548	15385	5.66292	100	OK	24521	10.7077
BURSTSTART	2016-09-24 15:00:04	20242	29.9191	4008	1.34773	100	OK	24683	10.7943		BURSTSTART	2016-09-24 15:03:04	20239	29.9548	16364	6.03638	100	OK	24527	10.7103
BURSTSTART	2016-09-24 15:05:04	20241	29.9208	4352	1.47896	100	OK	24685	10.7951		BURSTSTART	2016-09-24 15:08:04	20242	29.9497	12888	4.71039	100	OK	24523	10.7086
BURSTSTART	2016-09-24 15:10:04	20240	29.9225	4611	1.57776	100	OK	24684	10.7947		BURSTSTART	2016-09-24 15:13:04	20243	29.9481	14272	5.23835	100	OK	24520	10.7073
BURSTSTART	2016-09-24 15:15:04	20238	29.9258	9257	3.35007	100	OK	24684	10.7947		BURSTSTART	2016-09-24 15:18:04	20246	29.9431	11371	4.1317	100	OK	24518	10.7065
BURSTSTART	2016-09-24 15:20:04	20236	29.9292	7553	2.70004	100	OK	24685	10.7951		BURSTSTART	2016-09-24 15:23:04	20243	29.9481	14855	5.46074	100	OK	24517	10.7061
BURSTSTART	2016-09-24 15:25:04	20237	29.9275	4599	1.57318	100	OK	24687	10.796		BURSTSTART	2016-09-24 15:28:04	20243	29.9481	13500	4.94385	100	OK	24520	10.7073
BURSTSTART	2016-09-24 15:30:04	20239	29.9241	4606	1.57585	100	OK	24684	10.7947		BURSTSTART	2016-09-24 15:33:04	20244	29.9464	12878	4.70658	100	OK	24528	10.7107
BURSTSTART	2016-09-24 15:35:04	20241	29.9208	4332	1.47133	100	OK	24686	10.7955		BURSTSTART	2016-09-24 15:38:04	20243	29.9481	16418	6.05698	100	OK	24520	10.7073
BURSTSTART	2016-09-24 15:40:04	20244	29.9158	3993	1.34201	100	OK	24684	10.7947		BURSTSTART	2016-09-24 15:43:04	20246	29.9431	13145	4.80843	100	OK	24520	10.7073
BURSTSTART	2016-09-24 15:45:04	20249	29.9074	3673	1.21994	100	OK	24685	10.7951		BURSTSTART	2016-09-24 15:48:04	20243	29.9481	14336	5.26276	100	OK	24522	10.7082
BURSTSTART	2016-09-24 15:50:04	20252	29.9024	9260	3.35121	100	OK	24685	10.7951		BURSTSTART	2016-09-24 15:53:04	20245	29.9447	15443	5.68505	100	OK	24525	10.7094
BURSTSTART	2016-09-24 15:55:04	20251	29.9041	6110	2.14958	100	OK	24684	10.7947		BURSTSTART	2016-09-24 15:58:04	20242	29.9497	12721	4.64669	100	OK	24524	10.709
BURSTSTART	2016-09-24 16:00:04	20253	29.9007	3302	1.07842	100	OK	24685	10.7951		BURSTSTART	2016-09-24 16:03:04	20244	29.9464	15414	5.67399	100	OK	24525	10.7094
BURSTSTART	2016-09-24 16:05:04	20256	29.8957	4798	1.64909	100	OK	24685	10.7951		BURSTSTART	2016-09-24 16:08:04	20244	29.9464	13329	4.87862	100	OK	24523	10.7086
BURSTSTART	2016-09-24 16:10:04	20257	29.8941	3197	1.03836	100	OK	24683	10.7943		BURSTSTART	2016-09-24 16:13:04	20243	29.9481	16273	6.00167	100	OK	24523	10.7086
BURSTSTART	2016-09-24 16:15:04	20254	29.8991	4833	1.66245	100	OK	24683	10.7943		BURSTSTART	2016-09-24 16:18:04	20243	29.9481	16297	6.01082	100	OK	24519	10.7069
BURSTSTART	2016-09-24 16:20:04	20255	29.8974	7076	2.51808	100	OK	24684	10.7947		BURSTSTART	2016-09-24 16:23:04	20243	29.9481	22412	8.34351	100	OK	24522	10.7082
BURSTSTART	2016-09-24 16:25:04	20255	29.8974	3937	1.32065	100	OK	24683	10.7943		BURSTSTART	2016-09-24 16:28:04	20242	29.9497	16897	6.2397	100	OK	24520	10.7073
BURSTSTART	2016-09-24 16:30:04	20254	29.8991	4001	1.34506	100	OK	24686	10.7955		BURSTSTART	2016-09-24 16:33:04	20242	29.9497	16571	6.11534	100	OK	24452	10.6789
BURSTSTART	2016-09-24 16:35:04	20254	29.8991	4206	1.42327	100	OK	24685	10.7951		BURSTSTART	2016-09-24 16:38:04	20240	29.9531	15356	5.65186	100	OK	24525	10.7094
BURSTSTART	2016-09-24 16:40:04	20254	29.8991	4224	1.43013	100	OK	24683	10.7943		BURSTSTART	2016-09-24 16:43:04	20241	29.9514	16585	6.12069	100	OK	24519	10.7069
BURSTSTART	2016-09-24 16:45:04	20254	29.8991	4216	1.42708	100	OK	24684	10.7947		BURSTSTART	2016-09-24 16:48:04	20240	29.9531	17303	6.39458	100	OK	24522	10.7082
BURSTSTART	2016-09-24 16:50:04	20254	29.8991	4232	1.43318	100	OK	24684	10.7947		BURSTSTART	2016-09-24 16:53:04	20241	29.9514	16832	6.21491	100	OK	24522	10.7082
BURSTSTART	2016-09-24 16:55:04	20257	29.8941	4198	1.42021	100	OK	24659	10.7842		BURSTSTART	2016-09-24 16:58:04	20239	29.9548	16357	6.03371	100	OK	24523	10.7086
BURSTSTART	2016-09-24 17:00:04	20257	29.8941	3570	1.18065	100	OK	24682	10.7939		BURSTSTART	2016-09-24 17:03:04	20238	29.9564	15284	5.62439	100	OK	24521	10.7077
BURSTSTART	2016-09-24 17:05:04	20259	29.8907	3758	1.25237	100	OK	24683	10.7943		BURSTSTART	2016-09-24 17:08:04	20239	29.9548	18553	6.87142	100	OK	24521	10.7077
BURSTSTART	2016-09-24 17:10:04	20260	29.889	4363	1.48316	100	OK	24683	10.7943		BURSTSTART	2016-09-24 17:13:04	20238	29.9564	19436	7.20826	100	OK	24518	10.7065
BURSTSTART	2016-09-24 17:15:04	20263	29.884	3957	1.32828	100	OK	24682	10.7939		BURSTSTART	2016-09-24 17:18:04	20240	29.9531	17153	6.33736	100	OK	24520	10.7073
BURSTSTART	2016-09-24 17:20:04	20265	29.8807	4047	1.36261	100	OK	24680	10.793		BURSTSTART	2016-09-24 17:23:04	20241	29.9514	16895	6.23894	100	OK	24523	10.7086
BURSTSTART	2016-09-24 17:25:04	20269	29.874	4091	1.37939	100	OK	24682	10.7939		BURSTSTART	2016-09-24 17:28:04	20243	29.9481	26489	9.89876	100	OK	24522	10.7082
BURSTSTART	2016-09-24 17:30:04	20271	29.8707	4221	1.42899	100	OK	24680	10.793		BURSTSTART	2016-09-24 17:33:04	20243	29.9481	25768	9.62373	100	OK	24517	10.7061
BURSTSTART	2016-09-24 17:35:04	20275	29.864	8616	3.10555	100	OK	24680	10.793		BURSTSTART	2016-09-24 17:38:04	20242	29.9497	26072	9.73969	100	OK	24523	10.7086
BURSTSTART	2016-09-24 17:40:04	20278	29.859	4550	1.55449	100	OK	24679	10.7926		BURSTSTART	2016-09-24 17:43:04	20243	29.9481	23896	8.90961	100	OK	24522	10.7082
BURSTSTART	2016-09-24 17:45:04	20281	29.854	4522	1.54381	100	OK	24682	10.7939		BURSTSTART	2016-09-24 17:48:04	20245	29.9447	24864	9.27888	100	OK	24520	10.7073
BURSTSTART	2016-09-24 17:50:04	20284	29.8489	5075	1.75476	100	OK	24680	10.793		BURSTSTART	2016-09-24 17:53:04	20242	29.9497	27639	10.3375	100	OK	24518	10.7065
BURSTSTART	2016-09-24 17:55:04	20285	29.8473	4380	1.48964	100	OK	24679	10.7926		BURSTSTART	2016-09-24 17:58:04	20245	29.9447	22393	8.33626	100	OK	24517	10.7061
BURSTSTART	2016-09-24 18:00:04	20288	29.8423	4687	1.60675	100	OK	24678	10.7922		BURSTSTART	2016-09-24 18:03:04	20244	29.9464	22496	8.37556	100	OK	24520	10.7073
BURSTSTART	2016-09-24 18:05:04	20291	29.8373	4911	1.6922	100	OK	24680	10.793		BURSTSTART	2016-09-24 18:08:04	20244	29.9464	21782	8.10319	100	OK	24520	10.7073
BURSTSTART	2016-09-24 18:10:04	20290	29.8389	5278	1.8322	100	OK	24681	10.7934		BURSTSTART	2016-09-24 18:13:04	20244	29.9464	22492	8.37403	100	OK	24519	10.7069
BURSTSTART	2016-09-24 18:15:04	20292	29.8356	5593	1.95236	100	OK	24678	10.7922		BURSTSTART	2016-09-24 18:18:04	20242	29.9497	31643	11.8649	100	OK	24521	10.7077
BURSTSTART	2016-09-24 18:20:04	20294	29.8323	4916	1.69411	100	OK	24680	10.793		BURSTSTART	2016-09-24 18:23:04	20243	29.9481	22515	8.3828	100	OK	24523	10.7086
BURSTSTART	2016-09-24 18:25:04	20296	29.8289	6177	2.17514	100	OK	24678	10.7922		BURSTSTART	2016-09-24 18:28:04	20244	29.9464	22651	8.43468	100	OK	24520	10.7073
BURSTSTART	2016-09-24 18:30:04	20298	29.8256	4724	1.62087	100	OK	24678	10.7922		BURSTSTART	2016-09-24 18:33:04	20244	29.9464	25021	9.33877	100	OK	24522	10.7082
BURSTSTART	2016-09-24 18:35:04	20298	29.8256	4134	1.3958	100	OK	24678	10.7922		BURSTSTART	2016-09-24 18:38:04	20243	29.9481	26388	9.86024	100	OK	24523	10.7086
BURSTSTART	2016-09-24 18:40:04	20299	29.8239	4536	1.54915	100	OK	24678	10.7922		BURSTSTART	2016-09-24 18:43:04	20242	29.9497	23650	8.81577	100	OK	24522	10.7082
BURSTSTART	2016-09-24 18:45:04	20298	29.8256	5247	1.82038	100	OK	24676	10.7913		BURSTSTART	2016-09-24 18:48:04	20241	29.9514	21348	7.93763	100	OK	24522	10.7082
BURSTSTART	2016-09-24 18:50:04	20296	29.8289	4182	1.41411	100	OK	24679	10.7926		BURSTSTART	2016-09-24 18:53:04	20239	29.9548	24686	9.21097	100	OK	24517	10.7061
BURSTSTART	2016-09-24 18:55:04	20295	29.8306	4091	1.37939	100	OK	24677	10.7917		BURSTSTART	2016-09-24 18:58:04	20240	29.9531	19649	7.28951	100	OK	24517	10.7061
BURSTSTART	2016-09-24 19:00:04	20289	29.8406	7416	2.64778	100	OK	24678	10.7922		BURSTSTART	2016-09-24 19:03:04	20240	29.9531	22512	8.38166	100	OK	24518	10.7065
BURSTSTART	2016-09-24 19:05:04	20288	29.8423	5074	1.75438	100	OK	24678	10.7922		BURSTSTART	2016-09-24 19:08:04	20238	29.9564	19455	7.21551	100	OK	24520	10.7073
BURSTSTART	2016-09-24 19:10:04	20285	29.8473	4860	1.67275	100	OK	24677	10.7917		BURSTSTART	2016-09-24 19:13:04	20236	29.9598	24537	9.15414	100	OK	24521	10.7077
BURSTSTART	2016-09-24 19:15:04	20283	29.8506	4554	1.55602	100	OK	24677	10.7917		BURSTSTART	2016-09-24 19:18:04	20234	29.9631	21483	7.98913	100	OK	24518	10.7065
BURSTSTART	2016-09-24 19:20:04	20281	29.854	4094	1.38054	100	OK	24680	10.793		BURSTSTART	2016-09-24 19:23:04	20235	29.9614	22621	8.42324	100	OK	24516	10.7057
BURSTSTART	2016-09-24 19:25:04	20278	29.859	4492	1.53236	100	OK	24679	10.7926		BURSTSTART	2016-09-24 19:28:04	20233	29.9648	18516	6.85731	100	OK	24518	10.7065
BURSTSTART	2016-09-24 19:30:04	20275	29.864	4375	1.48773	100	OK	24678	10.7922		BURSTSTART	2016-09-24 19:33:04	20234	29.9631	20828	7.73926	100	OK	24518	10.7065
BURSTSTART	2016-09-24 19:35:04	20275	29.864	4535	1.54877	100	OK	24681	10.7934		BURSTSTART	2016-09-24 19:38:04	20233	29.9648	21775	8.10051	100	OK	24517	10.7061
BURSTSTART	2016-09-24 19:40:04	20274	29.8656	5111	1.76849	100	OK	24680	10.793		BURSTSTART	2016-09-24 19:43:04	20233	29.9648	28421	10.6358	100	OK	24519	10.7069
BURSTSTART	2016-09-24 19:45:04	20270	29.8723	5733	2.00577	100	OK	24679	10.7926		BURSTSTART	2016-09-24 19:48:04	20235	29.9614	25658	9.58176	100	OK	24522	10.7082
BURSTSTART	2016-09-24 19:50:04	20266	29.879	4059	1.36719	100	OK	24681	10.7934		BURSTSTART	2016-09-24 19:53:04	20233	29.9648	21439	7.97234	100	OK	24523	10.7086
BURSTSTART	2016-09-24 19:55:04	20262	29.8857	4770	1.63841	100	OK	24683	10.7943		BURSTSTART	2016-09-24 19:58:04	20233	29.9648	19601	7.2712	100	OK	24518	10.7065
BURSTSTART	2016-09-24 20:00:04	20261	29.8874	5028	1.73683	100	OK	24681	10.7934		BURSTSTART	2016-09-24 20:03:04	20234	29.9631	20731	7.70226	100	OK	24519	10.7069
BURSTSTART	2016-09-24 20:05:04	20260	29.889	4074	1.37291	100	OK	24681	10.7934		BURSTSTART	2016-09-24 20:08:04	20230	29.9698	17236	6.36902	100	OK	24517	10.7061
BURSTSTART	2016-09-24 20:10:04	20257	29.8941	4943	1.70441	100	OK	24682	10.7939		BURSTSTART	2016-09-24 20:13:04	20231	29.9681	18584	6.88324	100	OK	24520	10.7073
BURSTSTART	2016-09-24 20:15:04	20258	29.8924	5145	1.78147	100	OK	24682	10.7939		BURSTSTART	2016-09-24 20:18:04	20230	29.9698	23850	8.89207	100	OK	24517	10.7061
BURSTSTART	2016-09-24 20:20:04	20257	29.8941	4311	1.46332	100	OK	24682	10.7939		BURSTSTART	2016-09-24 20:23:04	20230	29.9698	22514	8.38242	100	OK	24516	10.7057
BURSTSTART	2016-09-24 20:25:04	20257	29.8941	4110	1.38664	100	OK	24681	10.7934		BURSTSTART	2016-09-24 20:28:04	20232	29.9665	22695	8.45147	100	OK	24521	10.7077
BURSTSTART	2016-09-24 20:30:04	20257	29.8941	3884	1.30043	100	OK	24680	10.793		BURSTSTART	2016-09-24 20:33:04	20232	29.9665	28513	10.6709	100	OK	24518	10.7065
BURSTSTART	2016-09-24 20:35:04	20257	29.8941	4356	1.48049	100	OK	24683	10.7943		BURSTSTART	2016-09-24 20:38:04	20228	29.9731	19949	7.40395	100	OK	24517	10.7061
BURSTSTART	2016-09-24 20:40:04	20256	29.8957	4339	1.474	100	OK	24681	10.7934		BURSTSTART	2016-09-24 20:43:04	20229	29.9715	18534	6.86417	100	OK	24516	10.7057
BURSTSTART	2016-09-24 20:45:04	20256	29.8957	4476	1.52626	100	OK	24684	10.7947		BURSTSTART	2016-09-24 20:48:04	20230	29.9698	21172	7.87049	100	OK	24519	10.7069
BURSTSTART	2016-09-24 20:50:04	20255	29.8974	4808	1.65291	100	OK	24683	10.7943		BURSTSTART	2016-09-24 20:53:04	20230	29.9698	24833	9.26705	100	OK	24516	10.7057
BURSTSTART	2016-09-24 20:55:04	20254	29.8991	4124	1.39198	100	OK	24684	10.7947		BURSTSTART	2016-09-24 20:58:04	20229	29.9715	20528	7.62482	100	OK	24517	10.7061
BURSTSTART	2016-09-24 21:00:04	20252	29.9024	4893	1.68533	100	OK	24682	10.7939		BURSTSTART	2016-09-24 21:03:04	20227	29.9748	22895	8.52776	100	OK	24492	10.6956
BURSTSTART	2016-09-24 21:05:04	20251	29.9041	7865	2.81906	100	OK	24682	10.7939		BURSTSTART	2016-09-24 21:08:04	20228	29.9731	24669	9.20449	100	OK	24518	10.7065
BURSTSTART	2016-09-24 21:10:04	20254	29.8991	3870	1.29509	100	OK	24683	10.7943		BURSTSTART	2016-09-24 21:13:04	20225	29.9782	24455	9.12285	100	OK	24514	10.7048
BURSTSTART	2016-09-24 21:15:04	20253	29.9007	8049	2.88925	100	OK	24682	10.7939		BURSTSTART	2016-09-24 21:18:04	20226	29.9765	20995	7.80297	100	OK	24513	10.7044
BURSTSTART	2016-09-24 21:20:04	20255	29.8974	5395	1.87683	100	OK	24681	10.7934		BURSTSTART	2016-09-24 21:23:04	20225	29.9782	16428	6.06079	100	OK	24515	10.7052
BURSTSTART	2016-09-24 21:25:04	20256	29.8957	5260	1.82533	100	OK	24678	10.7922		BURSTSTART	2016-09-24 21:28:04	20226	29.9765	17173	6.34499	100	OK	24515	10.7052
BURSTSTART	2016-09-24 21:30:04	20256	29.8957	6346	2.23961	100	OK	24684	10.7947		BURSTSTART	2016-09-24 21:33:04	20226	29.9765	20591	7.64886	100	OK	24515	10.7052
BURSTSTART	2016-09-24 21:35:04	20260	29.889	7068	2.51503	100	OK	24683	10.7943		BURSTSTART	2016-09-24 21:38:04	20225	29.9782	14709	5.40505	100	OK	24515	10.7052
BURSTSTART	2016-09-24 21:40:04	20263	29.884	4656	1.59493	100	OK	24683	10.7943		BURSTSTART	2016-09-24 21:43:04	20225	29.9782	24503	9.14117	100	OK	24515	10.7052
BURSTSTART	2016-09-24 21:45:04	20262	29.8857	4365	1.48392	100	OK	24683	10.7943		BURSTSTART	2016-09-24 21:48:04	20223	29.9815	16554	6.10886	100	OK	24515	10.7052
BURSTSTART	2016-09-24 21:50:04	20265	29.8807	4959	1.71051	100	OK	24685	10.7951		BURSTSTART	2016-09-24 21:53:04	20221	29.9848	12556	4.58374	100	OK	24517	10.7061
BURSTSTART	2016-09-24 21:55:04	20267	29.8773	7742	2.77214	100	OK	24684	10.7947		BURSTSTART	2016-09-24 21:58:04	20220	29.9865	11891	4.33007	100	OK	24514	10.7048
BURSTSTART	2016-09-24 22:00:04	20268	29.8757	5602	1.9558	100	OK	24684	10.7947		BURSTSTART	2016-09-24 22:03:04	20221	29.9848	15467	5.6942	100	OK	24511	10.7036
BURSTSTART	2016-09-24 22:05:04	20267	29.8773	7718	2.76299	100	OK	24684	10.7947		BURSTSTART	2016-09-24 22:08:04	20219	29.9882	12833	4.68941	100	OK	24512	10.704
BURSTSTART	2016-09-24 22:10:04	20267	29.8773	6561	2.32163	100	OK	24683	10.7943		BURSTSTART	2016-09-24 22:13:04	20219	29.9882	13436	4.91944	100	OK	24515	10.7052
BURSTSTART	2016-09-24 22:15:04	20267	29.8773	5109	1.76773	100	OK	24680	10.793		BURSTSTART	2016-09-24 22:18:04	20220	29.9865	12313	4.49105	100	OK	24513	10.7044
BURSTSTART	2016-09-24 22:20:04	20267	29.8773	4766	1.63689	100	OK	24683	10.7943		BURSTSTART	2016-09-24 22:23:04	20218	29.9899	11550	4.19998	100	OK	24512	10.704
BURSTSTART	2016-09-24 22:25:04	20268	29.8757	4316	1.46523	100	OK	24684	10.7947		BURSTSTART	2016-09-24 22:28:04	20221	29.9848	11227	4.07677	100	OK	24513	10.7044
BURSTSTART	2016-09-24 22:30:04	20268	29.8757	8141	2.92435	100	OK	24683	10.7943		BURSTSTART	2016-09-24 22:33:04	20219	29.9882	11117	4.03481	100	OK	24516	10.7057
BURSTSTART	2016-09-24 22:35:04	20265	29.8807	6092	2.14272	100	OK	24682	10.7939		BURSTSTART	2016-09-24 22:38:04	20218	29.9899	11364	4.12903	100	OK	24518	10.7065
BURSTSTART	2016-09-24 22:40:04	20265	29.8807	5371	1.86768	100	OK	24684	10.7947		BURSTSTART	2016-09-24 22:43:04	20218	29.9899	11634	4.23203	100	OK	24509	10.7027
BURSTSTART	2016-09-24 22:45:04	20267	29.8773	3926	1.31645	100	OK	24682	10.7939		BURSTSTART	2016-09-24 22:48:04	20219	29.9882	10209	3.68843	100	OK	24513	10.7044
BURSTSTART	2016-09-24 22:50:04	20266	29.879	4652	1.5934	100	OK	24681	10.7934		BURSTSTART	2016-09-24 22:53:04	20220	29.9865	10287	3.71819	100	OK	24512	10.704
BURSTSTART	2016-09-24 22:55:04	20266	29.879	6087	2.14081	100	OK	24683	10.7943		BURSTSTART	2016-09-24 22:58:04	20219	29.9882	10311	3.72734	100	OK	24510	10.7031
BURSTSTART	2016-09-24 23:00:04	20265	29.8807	4755	1.63269	100	OK	24684	10.7947		BURSTSTART	2016-09-24 23:03:04	20219	29.9882	9898	3.5698	100	OK	24519	10.7069
BURSTSTART	2016-09-24 23:05:04	20264	29.8824	4030	1.35613	100	OK	24681	10.7934		BURSTSTART	2016-09-24 23:08:04	20219	29.9882	14797	5.43862	100	OK	24514	10.7048
BURSTSTART	2016-09-24 23:10:04	20263	29.884	4551	1.55487	100	OK	24682	10.7939		BURSTSTART	2016-09-24 23:13:04	20219	29.9882	11604	4.22058	100	OK	24512	10.704
BURSTSTART	2016-09-24 23:15:04	20261	29.8874	6408	2.26326	100	OK	24681	10.7934		BURSTSTART	2016-09-24 23:18:04	20218	29.9899	19412	7.1991	100	OK	24513	10.7044
BURSTSTART	2016-09-24 23:20:04	20259	29.8907	6086	2.14043	100	OK	24683	10.7943		BURSTSTART	2016-09-24 23:23:04	20218	29.9899	11342	4.12064	100	OK	24515	10.7052
BURSTSTART	2016-09-24 23:25:04	20258	29.8924	3875	1.297	100	OK	24683	10.7943		BURSTSTART	2016-09-24 23:28:04	20218	29.9899	12888	4.71039	100	OK	24514	10.7048
BURSTSTART	2016-09-24 23:30:04	20257	29.8941	4503	1.53656	100	OK	24682	10.7939		BURSTSTART	2016-09-24 23:33:04	20215	29.9949	8297	2.95906	100	OK	24514	10.7048
BURSTSTART	2016-09-24 23:35:04	20257	29.8941	5986	2.10228	100	OK	24682	10.7939		BURSTSTART	2016-09-24 23:38:04	20217	29.9915	44461	16.7545	100	OK	24513	10.7044
BURSTSTART	2016-09-24 23:40:04	20255	29.8974	3900	1.30654	100	OK	24682	10.7939		BURSTSTART	2016-09-24 23:43:04	20214	29.9965	9188	3.29895	100	OK	24513	10.7044
BURSTSTART	2016-09-24 23:45:04	20254	29.8991	4187	1.41602	100	OK	24683	10.7943		BURSTSTART	2016-09-24 23:48:04	20215	29.9949	11524	4.19007	100	OK	24512	10.704
BURSTSTART	2016-09-24 23:50:04	20254	29.8991	5065	1.75095	100	OK	24684	10.7947		BURSTSTART	2016-09-24 23:53:04	20213	29.9982	9714	3.49961	100	OK	24515	10.7052
BURSTSTART	2016-09-24 23:55:04	20253	29.9007	4045	1.36185	100	OK	24683	10.7943		BURSTSTART	2016-09-24 23:58:04	20213	29.9982	9242	3.31955	100	OK	24512	10.704
BURSTSTART	2016-09-25 00:00:04	20251	29.9041	4652	1.5934	100	OK	24678	10.7922		BURSTSTART	2016-09-25 00:03:04	20213	29.9982	8335	2.97356	100	OK	24511	10.7036
BURSTSTART	2016-09-25 00:05:04	20250	29.9058	4031	1.35651	100	OK	24684	10.7947		BURSTSTART	2016-09-25 00:08:04	20212	29.9999	9196	3.302	100	OK	24515	10.7052
BURSTSTART	2016-09-25 00:10:04	20249	29.9074	4239	1.43585	100	OK	24684	10.7947		BURSTSTART	2016-09-25 00:13:04	20215	29.9949	8625	3.08419	100	OK	24511	10.7036
BURSTSTART	2016-09-25 00:15:04	20250	29.9058	6906	2.45323	100	OK	24683	10.7943		BURSTSTART	2016-09-25 00:18:04	20214	29.9965	8486	3.03116	100	OK	24512	10.704
BURSTSTART	2016-09-25 00:20:04	20247	29.9108	5316	1.8467	100	OK	24682	10.7939		BURSTSTART	2016-09-25 00:23:04	20214	29.9965	9199	3.30315	100	OK	24512	10.704
BURSTSTART	2016-09-25 00:25:04	20247	29.9108	3524	1.1631	100	OK	24681	10.7934		BURSTSTART	2016-09-25 00:28:04	20214	29.9965	7967	2.83318	100	OK	24509	10.7027
BURSTSTART	2016-09-25 00:30:04	20246	29.9124	5768	2.01912	100	OK	24682	10.7939		BURSTSTART	2016-09-25 00:33:04	20211	30.0016	7197	2.53945	100	OK	24512	10.704
BURSTSTART	2016-09-25 00:35:04	20247	29.9108	3952	1.32637	100	OK	24683	10.7943		BURSTSTART	2016-09-25 00:38:04	20212	29.9999	9170	3.29209	100	OK	24512	10.704
BURSTSTART	2016-09-25 00:40:04	20246	29.9124	3557	1.17569	100	OK	24684	10.7947		BURSTSTART	2016-09-25 00:43:04	20213	29.9982	8928	3.19977	100	OK	24512	10.704
BURSTSTART	2016-09-25 00:45:04	20243	29.9175	4072	1.37215	100	OK	24682	10.7939		BURSTSTART	2016-09-25 00:48:04	20213	29.9982	13499	4.94347	100	OK	24511	10.7036
BURSTSTART	2016-09-25 00:50:04	20244	29.9158	4213	1.42593	100	OK	24685	10.7951		BURSTSTART	2016-09-25 00:53:04	20216	29.9932	8518	3.04337	100	OK	24515	10.7052
BURSTSTART	2016-09-25 00:55:04	20247	29.9108	3119	1.00861	100	OK	24682	10.7939		BURSTSTART	2016-09-25 00:58:04	20214	29.9965	9462	3.40347	100	OK	24509	10.7027
BURSTSTART	2016-09-25 01:00:04	20247	29.9108	3434	1.12877	100	OK	24684	10.7947		BURSTSTART	2016-09-25 01:03:04	20214	29.9965	7980	2.83814	100	OK	24514	10.7048
BURSTSTART	2016-09-25 01:05:04	20247	29.9108	4089	1.37863	100	OK	24683	10.7943		BURSTSTART	2016-09-25 01:08:04	20213	29.9982	12418	4.5311	100	OK	24509	10.7027
BURSTSTART	2016-09-25 01:10:04	20248	29.9091	3382	1.10893	100	OK	24681	10.7934		BURSTSTART	2016-09-25 01:13:04	20216	29.9932	7293	2.57607	100	OK	24510	10.7031
BURSTSTART	2016-09-25 01:15:04	20250	29.9058	4056	1.36604	100	OK	24685	10.7951		BURSTSTART	2016-09-25 01:18:04	20217	29.9915	13952	5.11627	100	OK	24511	10.7036
BURSTSTART	2016-09-25 01:20:04	20250	29.9058	3790	1.26457	100	OK	24684	10.7947		BURSTSTART	2016-09-25 01:23:04	20217	29.9915	11377	4.13399	100	OK	24511	10.7036
BURSTSTART	2016-09-25 01:25:04	20249	29.9074	3897	1.30539	100	OK	24683	10.7943		BURSTSTART	2016-09-25 01:28:04	20217	29.9915	10155	3.66783	100	OK	24441	10.6743
BURSTSTART	2016-09-25 01:30:04	20247	29.9108	5591	1.9516	100	OK	24682	10.7939		BURSTSTART	2016-09-25 01:33:04	20217	29.9915	9636	3.46985	100	OK	24514	10.7048
BURSTSTART	2016-09-25 01:35:04	20249	29.9074	4590	1.56975	100	OK	24682	10.7939		BURSTSTART	2016-09-25 01:38:04	20219	29.9882	6516	2.27967	100	OK	24514	10.7048
BURSTSTART	2016-09-25 01:40:04	20248	29.9091	4038	1.35918	100	OK	24684	10.7947		BURSTSTART	2016-09-25 01:43:04	20217	29.9915	7163	2.52648	100	OK	24511	10.7036
BURSTSTART	2016-09-25 01:45:04	20248	29.9091	5579	1.94702	100	OK	24684	10.7947		BURSTSTART	2016-09-25 01:48:04	20219	29.9882	6695	2.34795	100	OK	24513	10.7044
BURSTSTART	2016-09-25 01:50:04	20245	29.9141	3718	1.23711	100	OK	24658	10.7838		BURSTSTART	2016-09-25 01:53:04	20218	29.9899	14305	5.25093	100	OK	24511	10.7036
BURSTSTART	2016-09-25 01:55:04	20245	29.9141	5269	1.82877	100	OK	24683	10.7943		BURSTSTART	2016-09-25 01:58:04	20220	29.9865	7214	2.54593	100	OK	24512	10.704
BURSTSTART	2016-09-25 02:00:04	20241	29.9208	3396	1.11427	100	OK	24682	10.7939		BURSTSTART	2016-09-25 02:03:04	20221	29.9848	6985	2.45857	100	OK	24511	10.7036
BURSTSTART	2016-09-25 02:05:04	20239	29.9241	5075	1.75476	100	OK	24681	10.7934		BURSTSTART	2016-09-25 02:08:04	20219	29.9882	14743	5.41802	100	OK	24512	10.704
BURSTSTART	2016-09-25 02:10:04	20242	29.9191	4003	1.34583	100	OK	24682	10.7939		BURSTSTART	2016-09-25 02:13:04	20221	29.9848	7693	2.72865	100	OK	24517	10.7061
BURSTSTART	2016-09-25 02:15:04	20239	29.9241	5098	1.76354	100	OK	24684	10.7947		BURSTSTART	2016-09-25 02:18:04	20221	29.9848	6263	2.18315	100	OK	24512	10.704
BURSTSTART	2016-09-25 02:20:04	20244	29.9158	3904	1.30806	100	OK	24683	10.7943		BURSTSTART	2016-09-25 02:23:04	20220	29.9865	6647	2.32964	100	OK	24507	10.7019
BURSTSTART	2016-09-25 02:25:04	20249	29.9074	6108	2.14882	100	OK	24682	10.7939		BURSTSTART	2016-09-25 02:28:04	20227	29.9748	6857	2.40975	100	OK	24513	10.7044
BURSTSTART	2016-09-25 02:30:04	20251	29.9041	4219	1.42822	100	OK	24683	10.7943		BURSTSTART	2016-09-25 02:33:04	20224	29.9798	7219	2.54784	100	OK	24515	10.7052
BURSTSTART	2016-09-25 02:35:04	20251	29.9041	3181	1.03226	100	OK	24682	10.7939		BURSTSTART	2016-09-25 02:38:04	20224	29.9798	7642	2.7092	100	OK	24514	10.7048
BURSTSTART	2016-09-25 02:40:04	20254	29.8991	7161	2.55051	100	OK	24680	10.793		BURSTSTART	2016-09-25 02:43:04	20223	29.9815	9489	3.41377	100	OK	24513	10.7044
BURSTSTART	2016-09-25 02:45:04	20252	29.9024	3986	1.33934	100	OK	24680	10.793		BURSTSTART	2016-09-25 02:48:04	20224	29.9798	6272	2.18659	100	OK	24514	10.7048
BURSTSTART	2016-09-25 02:50:04	20256	29.8957	3625	1.20163	100	OK	24680	10.793		BURSTSTART	2016-09-25 02:53:04	20225	29.9782	6441	2.25105	100	OK	24512	10.704
BURSTSTART	2016-09-25 02:55:04	20256	29.8957	3282	1.07079	100	OK	24679	10.7926		BURSTSTART	2016-09-25 02:58:04	20225	29.9782	8255	2.94304	100	OK	24517	10.7061
BURSTSTART	2016-09-25 03:00:04	20259	29.8907	4249	1.43967	100	OK	24680	10.793		BURSTSTART	2016-09-25 03:03:04	20226	29.9765	6765	2.37465	100	OK	24510	10.7031
BURSTSTART	2016-09-25 03:05:04	20261	29.8874	4353	1.47934	100	OK	24679	10.7926		BURSTSTART	2016-09-25 03:08:04	20225	29.9782	6620	2.31934	100	OK	24512	10.704
BURSTSTART	2016-09-25 03:10:04	20261	29.8874	3513	1.15891	100	OK	24680	10.793		BURSTSTART	2016-09-25 03:13:04	20230	29.9698	5646	1.94779	100	OK	24517	10.7061
BURSTSTART	2016-09-25 03:15:04	20253	29.9007	4029	1.35574	100	OK	24681	10.7934		BURSTSTART	2016-09-25 03:18:04	20232	29.9665	8406	3.00064	100	OK	24511	10.7036
BURSTSTART	2016-09-25 03:20:04	20247	29.9108	5113	1.76926	100	OK	24681	10.7934		BURSTSTART	2016-09-25 03:23:04	20234	29.9631	8026	2.85568	100	OK	24520	10.7073
BURSTSTART	2016-09-25 03:25:04	20241	29.9208	6469	2.28653	100	OK	24682	10.7939		BURSTSTART	2016-09-25 03:28:04	20233	29.9648	6216	2.16522	100	OK	24513	10.7044
BURSTSTART	2016-09-25 03:30:04	20217	29.9609	5440	1.894	100	OK	24684	10.7947		BURSTSTART	2016-09-25 03:33:04	20233	29.9648	6098	2.12021	100	OK	24517	10.7061
BURSTSTART	2016-09-25 03:35:04	20199	29.9911	5223	1.81122	100	OK	24683	10.7943		BURSTSTART	2016-09-25 03:38:04	20231	29.9681	6458	2.25754	100	OK	24513	10.7044
BURSTSTART	2016-09-25 03:40:04	20186	30.0129	6142	2.16179	100	OK	24686	10.7955		BURSTSTART	2016-09-25 03:43:04	20235	29.9614	5694	1.9661	100	OK	24515	10.7052
BURSTSTART	2016-09-25 03:45:04	20182	30.0196	5143	1.7807	100	OK	24687	10.796		BURSTSTART	2016-09-25 03:48:04	20233	29.9648	6110	2.12479	100	OK	24514	10.7048
BURSTSTART	2016-09-25 03:50:04	20182	30.0196	6975	2.47955	100	OK	24686	10.7955		BURSTSTART	2016-09-25 03:53:04	20234	29.9631	7579	2.68517	100	OK	24513	10.7044
BURSTSTART	2016-09-25 03:55:04	20182	30.0196	6443	2.27661	100	OK	24688	10.7964		BURSTSTART	2016-09-25 03:58:04	20238	29.9564	6117	2.12746	100	OK	24516	10.7057
BURSTSTART	2016-09-25 04:00:04	20181	30.0212	5066	1.75133	100	OK	24690	10.7972		BURSTSTART	2016-09-25 04:03:04	20244	29.9464	6061	2.1061	100	OK	24515	10.7052
BURSTSTART	2016-09-25 04:05:04	20180	30.0229	4828	1.66054	100	OK	24688	10.7964		BURSTSTART	2016-09-25 04:08:04	20249	29.9381	5248	1.79596	100	OK	24516	10.7057
BURSTSTART	2016-09-25 04:10:04	20180	30.0229	5433	1.89133	100	OK	24689	10.7968		BURSTSTART	2016-09-25 04:13:04	20247	29.9414	5899	2.0443	100	OK	24512	10.704
BURSTSTART	2016-09-25 04:15:04	20181	30.0212	4337	1.47324	100	OK	24691	10.7976		BURSTSTART	2016-09-25 04:18:04	20247	29.9414	5018	1.70822	100	OK	24514	10.7048
BURSTSTART	2016-09-25 04:20:04	20181	30.0212	4234	1.43395	100	OK	24690	10.7972		BURSTSTART	2016-09-25 04:23:04	20247	29.9414	14252	5.23072	100	OK	24520	10.7073
BURSTSTART	2016-09-25 04:25:04	20181	30.0212	7723	2.76489	100	OK	24689	10.7968		BURSTSTART	2016-09-25 04:28:04	20247	29.9414	6337	2.21138	100	OK	24517	10.7061
BURSTSTART	2016-09-25 04:30:04	20182	30.0196	4407	1.49994	100	OK	24689	10.7968		BURSTSTART	2016-09-25 04:33:04	20247	29.9414	5230	1.78909	100	OK	24514	10.7048
BURSTSTART	2016-09-25 04:35:04	20184	30.0162	6800	2.4128	100	OK	24689	10.7968		BURSTSTART	2016-09-25 04:38:04	20246	29.9431	7614	2.69852	100	OK	24516	10.7057
BURSTSTART	2016-09-25 04:40:04	20186	30.0129	4021	1.35269	100	OK	24690	10.7972		BURSTSTART	2016-09-25 04:43:04	20249	29.9381	5091	1.73607	100	OK	24513	10.7044
BURSTSTART	2016-09-25 04:45:04	20183	30.0179	4614	1.5789	100	OK	24688	10.7964		BURSTSTART	2016-09-25 04:48:04	20250	29.9364	5513	1.89705	100	OK	24515	10.7052
BURSTSTART	2016-09-25 04:50:04	20183	30.0179	6216	2.19002	100	OK	24689	10.7968		BURSTSTART	2016-09-25 04:53:04	20255	29.928	5976	2.07367	100	OK	24513	10.7044
BURSTSTART	2016-09-25 04:55:04	20181	30.0212	7025	2.49863	100	OK	24688	10.7964		BURSTSTART	2016-09-25 04:58:04	20254	29.9297	5052	1.72119	100	OK	24514	10.7048
BURSTSTART	2016-09-25 05:00:04	20183	30.0179	5070	1.75286	100	OK	24687	10.796		BURSTSTART	2016-09-25 05:03:04	20255	29.928	6030	2.09427	100	OK	24513	10.7044
BURSTSTART	2016-09-25 05:05:04	20187	30.0112	8234	2.95983	100	OK	24689	10.7968		BURSTSTART	2016-09-25 05:08:04	20254	29.9297	5263	1.80168	100	OK	24514	10.7048
BURSTSTART	2016-09-25 05:10:04	20190	30.0062	6229	2.19498	100	OK	24687	10.796		BURSTSTART	2016-09-25 05:13:04	20255	29.928	5256	1.79901	100	OK	24515	10.7052
BURSTSTART	2016-09-25 05:15:04	20193	30.0011	4327	1.46942	100	OK	24689	10.7968		BURSTSTART	2016-09-25 05:18:04	20256	29.9264	5241	1.79329	100	OK	24513	10.7044
BURSTSTART	2016-09-25 05:20:04	20177	30.0279	4434	1.51024	100	OK	24688	10.7964		BURSTSTART	2016-09-25 05:23:04	20256	29.9264	6090	2.11716	100	OK	24512	10.704
BURSTSTART	2016-09-25 05:25:04	20170	30.0397	4976	1.717	100	OK	24690	10.7972		BURSTSTART	2016-09-25 05:28:04	20257	29.9247	6520	2.28119	100	OK	24513	10.7044
BURSTSTART	2016-09-25 05:30:04	20172	30.0363	9582	3.47405	100	OK	24689	10.7968		BURSTSTART	2016-09-25 05:33:04	20261	29.918	6002	2.08359	100	OK	24513	10.7044
BURSTSTART	2016-09-25 05:35:04	20166	30.0464	8790	3.17192	100	OK	24688	10.7964		BURSTSTART	2016-09-25 05:38:04	20264	29.913	6405	2.23732	100	OK	24516	10.7057
BURSTSTART	2016-09-25 05:40:04	20160	30.0564	5921	2.07749	100	OK	24691	10.7976		BURSTSTART	2016-09-25 05:43:04	20268	29.9063	5015	1.70708	100	OK	24514	10.7048
BURSTSTART	2016-09-25 05:45:04	20161	30.0547	4915	1.69373	100	OK	24692	10.7981		BURSTSTART	2016-09-25 05:48:04	20265	29.9113	6402	2.23618	100	OK	24512	10.704
BURSTSTART	2016-09-25 05:50:04	20161	30.0547	7813	2.79923	100	OK	24690	10.7972		BURSTSTART	2016-09-25 05:53:04	20270	29.903	5812	2.01111	100	OK	24516	10.7057
BURSTSTART	2016-09-25 05:55:04	20162	30.0531	5480	1.90926	100	OK	24689	10.7968		BURSTSTART	2016-09-25 05:58:04	20275	29.8947	7430	2.62833	100	OK	24443	10.6751
BURSTSTART	2016-09-25 06:00:04	20165	30.048	5079	1.75629	100	OK	24690	10.7972		BURSTSTART	2016-09-25 06:03:04	20277	29.8913	8694	3.11051	100	OK	24514	10.7048
BURSTSTART	2016-09-25 06:05:04	20171	30.038	5159	1.7868	100	OK	24690	10.7972		BURSTSTART	2016-09-25 06:08:04	20276	29.893	6211	2.16332	100	OK	24512	10.704
BURSTSTART	2016-09-25 06:10:04	20175	30.0313	5399	1.87836	100	OK	24689	10.7968		BURSTSTART	2016-09-25 06:13:04	20277	29.8913	6742	2.36588	100	OK	24518	10.7065
BURSTSTART	2016-09-25 06:15:04	20180	30.0229	4531	1.54724	100	OK	24689	10.7968		BURSTSTART	2016-09-25 06:18:04	20275	29.8947	5976	2.07367	100	OK	24513	10.7044
BURSTSTART	2016-09-25 06:20:04	20185	30.0145	4808	1.65291	100	OK	24664	10.7863		BURSTSTART	2016-09-25 06:23:04	20276	29.893	9238	3.31803	100	OK	24513	10.7044
BURSTSTART	2016-09-25 06:25:04	20191	30.0045	5079	1.75629	100	OK	24689	10.7968		BURSTSTART	2016-09-25 06:28:04	20274	29.8963	7494	2.65274	100	OK	24517	10.7061
BURSTSTART	2016-09-25 06:30:04	20193	30.0011	9344	3.38326	100	OK	24690	10.7972		BURSTSTART	2016-09-25 06:33:04	20273	29.898	9494	3.41568	100	OK	24516	10.7057
BURSTSTART	2016-09-25 06:35:04	20195	29.9978	4029	1.35574	100	OK	24686	10.7955		BURSTSTART	2016-09-25 06:38:04	20272	29.8997	5098	1.73874	100	OK	24513	10.7044
BURSTSTART	2016-09-25 06:40:04	20197	29.9944	4705	1.61362	100	OK	24691	10.7976		BURSTSTART	2016-09-25 06:43:04	20272	29.8997	6008	2.08588	100	OK	24513	10.7044
BURSTSTART	2016-09-25 06:45:04	20188	30.0095	6900	2.45094	100	OK	24688	10.7964		BURSTSTART	2016-09-25 06:48:04	20272	29.8997	5994	2.08054	100	OK	24517	10.7061
BURSTSTART	2016-09-25 06:50:04	20188	30.0095	4567	1.56098	100	OK	24689	10.7968		BURSTSTART	2016-09-25 06:53:04	20270	29.903	6324	2.20642	100	OK	24514	10.7048
BURSTSTART	2016-09-25 06:55:04	20190	30.0062	5074	1.75438	100	OK	24690	10.7972		BURSTSTART	2016-09-25 06:58:04	20270	29.903	7682	2.72446	100	OK	24512	10.704
BURSTSTART	2016-09-25 07:00:04	20189	30.0078	4854	1.67046	100	OK	24691	10.7976		BURSTSTART	2016-09-25 07:03:04	20270	29.903	5690	1.96457	100	OK	24512	10.704
BURSTSTART	2016-09-25 07:05:04	20189	30.0078	3969	1.33286	100	OK	24690	10.7972		BURSTSTART	2016-09-25 07:08:04	20271	29.9013	6249	2.17781	100	OK	24512	10.704
BURSTSTART	2016-09-25 07:10:04	20193	30.0011	4060	1.36757	100	OK	24689	10.7968		BURSTSTART	2016-09-25 07:13:04	20269	29.9047	5962	2.06833	100	OK	24511	10.7036
BURSTSTART	2016-09-25 07:15:04	20198	29.9928	5569	1.94321	100	OK	24688	10.7964		BURSTSTART	2016-09-25 07:18:04	20267	29.908	6066	2.108	100	OK	24512	10.704
BURSTSTART	2016-09-25 07:20:04	20198	29.9928	24306	9.09081	100	OK	24689	10.7968		BURSTSTART	2016-09-25 07:23:04	20264	29.913	9544	3.43476	100	OK	24515	10.7052
BURSTSTART	2016-09-25 07:25:04	20200	29.9894	4746	1.62926	100	OK	24689	10.7968		BURSTSTART	2016-09-25 07:28:04	20264	29.913	6154	2.14157	100	OK	24511	10.7036
BURSTSTART	2016-09-25 07:30:04	20198	29.9928	8289	2.98081	100	OK	24690	10.7972		BURSTSTART	2016-09-25 07:33:04	20266	29.9097	5879	2.03667	100	OK	24509	10.7027
BURSTSTART	2016-09-25 07:35:04	20197	29.9944	19692	7.33071	100	OK	24689	10.7968		BURSTSTART	2016-09-25 07:38:04	20264	29.913	7015	2.47002	100	OK	24513	10.7044
BURSTSTART	2016-09-25 07:40:04	20203	29.9844	4275	1.44959	100	OK	24688	10.7964		BURSTSTART	2016-09-25 07:43:04	20263	29.9147	6853	2.40822	100	OK	24509	10.7027
BURSTSTART	2016-09-25 07:45:04	20203	29.9844	4073	1.37253	100	OK	24687	10.796		BURSTSTART	2016-09-25 07:48:04	20262	29.9163	6178	2.15073	100	OK	24511	10.7036
BURSTSTART	2016-09-25 07:50:04	20205	29.981	7443	2.65808	100	OK	24689	10.7968		BURSTSTART	2016-09-25 07:53:04	20260	29.9197	8082	2.87705	100	OK	24511	10.7036
BURSTSTART	2016-09-25 07:55:04	20205	29.981	5802	2.03209	100	OK	24688	10.7964		BURSTSTART	2016-09-25 07:58:04	20256	29.9264	12241	4.46358	100	OK	24512	10.704
BURSTSTART	2016-09-25 08:00:04	20206	29.9794	9247	3.34626	100	OK	24686	10.7955		BURSTSTART	2016-09-25 08:03:04	20255	29.928	11645	4.23622	100	OK	24511	10.7036
BURSTSTART	2016-09-25 08:05:04	20205	29.981	3660	1.21498	100	OK	24687	10.796		BURSTSTART	2016-09-25 08:08:04	20253	29.9314	7781	2.76222	100	OK	24506	10.7015
BURSTSTART	2016-09-25 08:10:04	20196	29.9961	4229	1.43204	100	OK	24687	10.796		BURSTSTART	2016-09-25 08:13:04	20251	29.9347	6773	2.3777	100	OK	24506	10.7015
BURSTSTART	2016-09-25 08:15:04	20195	29.9978	3977	1.33591	100	OK	24688	10.7964		BURSTSTART	2016-09-25 08:18:04	20250	29.9364	7428	2.62757	100	OK	24511	10.7036
BURSTSTART	2016-09-25 08:20:04	20196	29.9961	3772	1.25771	100	OK	24687	10.796		BURSTSTART	2016-09-25 08:23:04	20249	29.9381	9572	3.44544	100	OK	24507	10.7019
BURSTSTART	2016-09-25 08:25:04	20196	29.9961	4982	1.71928	100	OK	24689	10.7968		BURSTSTART	2016-09-25 08:28:04	20247	29.9414	5961	2.06795	100	OK	24508	10.7023
BURSTSTART	2016-09-25 08:30:04	20194	29.9995	4082	1.37596	100	OK	24689	10.7968		BURSTSTART	2016-09-25 08:33:04	20244	29.9464	6192	2.15607	100	OK	24506	10.7015
BURSTSTART	2016-09-25 08:35:04	20197	29.9944	6627	2.3468	100	OK	24689	10.7968		BURSTSTART	2016-09-25 08:38:04	20226	29.9765	6997	2.46315	100	OK	24505	10.701
BURSTSTART	2016-09-25 08:40:04	20197	29.9944	4823	1.65863	100	OK	24689	10.7968		BURSTSTART	2016-09-25 08:43:04	20215	29.9949	8242	2.93808	100	OK	24499	10.6985
BURSTSTART	2016-09-25 08:45:04	20195	29.9978	4026	1.3546	100	OK	24688	10.7964		BURSTSTART	2016-09-25 08:48:04	20213	29.9982	9253	3.32375	100	OK	24499	10.6985
BURSTSTART	2016-09-25 08:50:04	20173	30.0346	4840	1.66512	100	OK	24689	10.7968		BURSTSTART	2016-09-25 08:53:04	20216	29.9932	6534	2.28653	100	OK	24498	10.6981
BURSTSTART	2016-09-25 08:55:04	20170	30.0397	7375	2.63214	100	OK	24691	10.7976		BURSTSTART	2016-09-25 08:58:04	20215	29.9949	7126	2.51236	100	OK	24500	10.699
BURSTSTART	2016-09-25 09:00:04	20171	30.038	4637	1.58768	100	OK	24689	10.7968		BURSTSTART	2016-09-25 09:03:04	20215	29.9949	5884	2.03858	100	OK	24500	10.699
BURSTSTART	2016-09-25 09:05:04	20173	30.0346	4235	1.43433	100	OK	24692	10.7981		BURSTSTART	2016-09-25 09:08:04	20211	30.0016	5424	1.8631	100	OK	24503	10.7002
BURSTSTART	2016-09-25 09:10:04	20179	30.0246	8221	2.95487	100	OK	24692	10.7981		BURSTSTART	2016-09-25 09:13:04	20211	30.0016	5406	1.85623	100	OK	24503	10.7002
BURSTSTART	2016-09-25 09:15:04	20179	30.0246	7429	2.65274	100	OK	24692	10.7981		BURSTSTART	2016-09-25 09:18:04	20206	30.0099	7263	2.56462	100	OK	24501	10.6994
BURSTSTART	2016-09-25 09:20:04	20182	30.0196	4696	1.61018	100	OK	24690	10.7972		BURSTSTART	2016-09-25 09:23:04	20206	30.0099	6693	2.34719	100	OK	24498	10.6981
BURSTSTART	2016-09-25 09:25:04	20178	30.0263	5364	1.86501	100	OK	24692	10.7981		BURSTSTART	2016-09-25 09:28:04	20202	30.0166	7099	2.50206	100	OK	24499	10.6985
BURSTSTART	2016-09-25 09:30:04	20156	30.0631	4484	1.52931	100	OK	24694	10.7989		BURSTSTART	2016-09-25 09:33:04	20199	30.0216	6282	2.1904	100	OK	24499	10.6985
BURSTSTART	2016-09-25 09:35:04	20156	30.0631	7109	2.53067	100	OK	24696	10.7997		BURSTSTART	2016-09-25 09:38:04	20196	30.0266	5274	1.80588	100	OK	24498	10.6981
BURSTSTART	2016-09-25 09:40:04	20151	30.0715	4433	1.50986	100	OK	24692	10.7981		BURSTSTART	2016-09-25 09:43:04	20193	30.0317	6203	2.16026	100	OK	24502	10.6998
BURSTSTART	2016-09-25 09:45:04	20141	30.0883	8910	3.2177	100	OK	24698	10.8006		BURSTSTART	2016-09-25 09:48:04	20192	30.0333	6261	2.18239	100	OK	24502	10.6998
BURSTSTART	2016-09-25 09:50:04	20137	30.095	6771	2.40173	100	OK	24697	10.8002		BURSTSTART	2016-09-25 09:53:04	20187	30.0417	8765	3.13759	100	OK	24498	10.6981
BURSTSTART	2016-09-25 09:55:04	20135	30.0984	4676	1.60255	100	OK	24697	10.8002		BURSTSTART	2016-09-25 09:58:04	20187	30.0417	5648	1.94855	100	OK	24497	10.6977
BURSTSTART	2016-09-25 10:00:04	20131	30.1051	7317	2.61002	100	OK	24697	10.8002		BURSTSTART	2016-09-25 10:03:04	20185	30.0451	7046	2.48184	100	OK	24497	10.6977
BURSTSTART	2016-09-25 10:05:04	20134	30.1	6003	2.10877	100	OK	24696	10.7997		BURSTSTART	2016-09-25 10:08:04	20174	30.0635	6335	2.21062	100	OK	24497	10.6977
BURSTSTART	2016-09-25 10:10:04	20132	30.1034	6880	2.44332	100	OK	24699	10.801		BURSTSTART	2016-09-25 10:13:04	20168	30.0735	8195	2.92015	100	OK	24495	10.6969
BURSTSTART	2016-09-25 10:15:04	20130	30.1068	5229	1.81351	100	OK	24698	10.8006		BURSTSTART	2016-09-25 10:18:04	20169	30.0718	8133	2.8965	100	OK	24497	10.6977
BURSTSTART	2016-09-25 10:20:04	20130	30.1068	5210	1.80626	100	OK	24697	10.8002		BURSTSTART	2016-09-25 10:23:04	20173	30.0651	6895	2.42424	100	OK	24495	10.6969
BURSTSTART	2016-09-25 10:25:04	20126	30.1135	5043	1.74256	100	OK	24698	10.8006		BURSTSTART	2016-09-25 10:28:04	20164	30.0802	7185	2.53487	100	OK	24432	10.6705
BURSTSTART	2016-09-25 10:30:04	20125	30.1151	5027	1.73645	100	OK	24699	10.801		BURSTSTART	2016-09-25 10:33:04	20162	30.0836	6773	2.3777	100	OK	24497	10.6977
BURSTSTART	2016-09-25 10:35:04	20123	30.1185	3907	1.3092	100	OK	24699	10.801		BURSTSTART	2016-09-25 10:38:04	20162	30.0836	7284	2.57263	100	OK	24496	10.6973
BURSTSTART	2016-09-25 10:40:04	20119	30.1252	4239	1.43585	100	OK	24698	10.8006		BURSTSTART	2016-09-25 10:43:04	20160	30.0869	5954	2.06528	100	OK	24497	10.6977
BURSTSTART	2016-09-25 10:45:04	20118	30.1269	4965	1.7128	100	OK	24699	10.801		BURSTSTART	2016-09-25 10:48:04	20166	30.0769	6452	2.25525	100	OK	24496	10.6973
BURSTSTART	2016-09-25 10:50:04	20117	30.1286	5222	1.81084	100	OK	24670	10.7888		BURSTSTART	2016-09-25 10:53:04	20164	30.0802	6987	2.45934	100	OK	24497	10.6977
BURSTSTART	2016-09-25 10:55:04	20118	30.1269	5241	1.81809	100	OK	24698	10.8006		BURSTSTART	2016-09-25 10:58:04	20163	30.0819	8043	2.86217	100	OK	24497	10.6977
BURSTSTART	2016-09-25 11:00:04	20119	30.1252	6986	2.48375	100	OK	24698	10.8006		BURSTSTART	2016-09-25 11:03:04	20175	30.0618	7444	2.63367	100	OK	24498	10.6981
BURSTSTART	2016-09-25 11:05:04	20119	30.1252	5298	1.83983	100	OK	24698	10.8006		BURSTSTART	2016-09-25 11:08:04	20182	30.0501	8337	2.97432	100	OK	24498	10.6981
BURSTSTART	2016-09-25 11:10:04	20118	30.1269	5380	1.87111	100	OK	24700	10.8014		BURSTSTART	2016-09-25 11:13:04	20178	30.0568	8672	3.10211	100	OK	24497	10.6977
BURSTSTART	2016-09-25 11:15:04	20119	30.1252	4379	1.48926	100	OK	24699	10.801		BURSTSTART	2016-09-25 11:18:04	20179	30.0551	6001	2.08321	100	OK	24498	10.6981
BURSTSTART	2016-09-25 11:20:04	20113	30.1353	5185	1.79672	100	OK	24698	10.8006		BURSTSTART	2016-09-25 11:23:04	20172	30.0668	7163	2.52648	100	OK	24497	10.6977
BURSTSTART	2016-09-25 11:25:04	20114	30.1336	5008	1.7292	100	OK	24698	10.8006		BURSTSTART	2016-09-25 11:28:04	20170	30.0702	8221	2.93007	100	OK	24498	10.6981
BURSTSTART	2016-09-25 11:30:04	20120	30.1235	5977	2.09885	100	OK	24700	10.8014		BURSTSTART	2016-09-25 11:33:04	20175	30.0618	6846	2.40555	100	OK	24497	10.6977
BURSTSTART	2016-09-25 11:35:04	20122	30.1202	6271	2.211	100	OK	24700	10.8014		BURSTSTART	2016-09-25 11:38:04	20173	30.0651	6872	2.41547	100	OK	24498	10.6981
BURSTSTART	2016-09-25 11:40:04	20123	30.1185	5469	1.90506	100	OK	24700	10.8014		BURSTSTART	2016-09-25 11:43:04	20171	30.0685	7085	2.49672	100	OK	24494	10.6964
BURSTSTART	2016-09-25 11:45:04	20121	30.1219	7233	2.57797	100	OK	24699	10.801		BURSTSTART	2016-09-25 11:48:04	20166	30.0769	6585	2.30599	100	OK	24495	10.6969
BURSTSTART	2016-09-25 11:50:04	20128	30.1101	6768	2.40059	100	OK	24699	10.801		BURSTSTART	2016-09-25 11:53:04	20155	30.0953	6880	2.41852	100	OK	24497	10.6977
BURSTSTART	2016-09-25 11:55:04	20131	30.1051	5404	1.88027	100	OK	24699	10.801		BURSTSTART	2016-09-25 11:58:04	20155	30.0953	7801	2.76985	100	OK	24495	10.6969
BURSTSTART	2016-09-25 12:00:04	20137	30.095	8699	3.13721	100	OK	24698	10.8006		BURSTSTART	2016-09-25 12:03:04	20154	30.097	6874	2.41623	100	OK	24493	10.696
BURSTSTART	2016-09-25 12:05:04	20132	30.1034	4211	1.42517	100	OK	24698	10.8006		BURSTSTART	2016-09-25 12:08:04	20149	30.1053	6347	2.2152	100	OK	24495	10.6969
BURSTSTART	2016-09-25 12:10:04	20144	30.0833	4153	1.40305	100	OK	24696	10.7997		BURSTSTART	2016-09-25 12:13:04	20148	30.107	6593	2.30904	100	OK	24493	10.696
BURSTSTART	2016-09-25 12:15:04	20148	30.0766	5138	1.77879	100	OK	24695	10.7993		BURSTSTART	2016-09-25 12:18:04	20152	30.1003	7232	2.5528	100	OK	24493	10.696
BURSTSTART	2016-09-25 12:20:04	20151	30.0715	4151	1.40228	100	OK	24695	10.7993		BURSTSTART	2016-09-25 12:23:04	20156	30.0936	7318	2.5856	100	OK	24494	10.6964
BURSTSTART	2016-09-25 12:25:04	20153	30.0682	4245	1.43814	100	OK	24694	10.7989		BURSTSTART	2016-09-25 12:28:04	20152	30.1003	8457	3.0201	100	OK	24499	10.6985
BURSTSTART	2016-09-25 12:30:04	20161	30.0547	4447	1.5152	100	OK	24693	10.7985		BURSTSTART	2016-09-25 12:33:04	20158	30.0903	8675	3.10326	100	OK	24495	10.6969
BURSTSTART	2016-09-25 12:35:04	20163	30.0514	5200	1.80245	100	OK	24695	10.7993		BURSTSTART	2016-09-25 12:38:04	20154	30.097	9541	3.43361	100	OK	24496	10.6973
BURSTSTART	2016-09-25 12:40:04	20170	30.0397	4496	1.53389	100	OK	24694	10.7989		BURSTSTART	2016-09-25 12:43:04	20152	30.1003	8542	3.05252	100	OK	24494	10.6964
BURSTSTART	2016-09-25 12:45:04	20174	30.033	4941	1.70365	100	OK	24694	10.7989		BURSTSTART	2016-09-25 12:48:04	20151	30.102	8778	3.14255	100	OK	24491	10.6952
BURSTSTART	2016-09-25 12:50:04	20177	30.0279	5968	2.09542	100	OK	24693	10.7985		BURSTSTART	2016-09-25 12:53:04	20147	30.1087	10158	3.66898	100	OK	24494	10.6964
BURSTSTART	2016-09-25 12:55:04	20182	30.0196	4352	1.47896	100	OK	24692	10.7981		BURSTSTART	2016-09-25 12:58:04	20145	30.112	9587	3.45116	100	OK	24493	10.696
BURSTSTART	2016-09-25 13:00:04	20182	30.0196	4206	1.42327	100	OK	24690	10.7972		BURSTSTART	2016-09-25 13:03:04	20147	30.1087	9948	3.58887	100	OK	24489	10.6944
BURSTSTART	2016-09-25 13:05:04	20187	30.0112	4844	1.66664	100	OK	24692	10.7981		BURSTSTART	2016-09-25 13:08:04	20145	30.112	8325	2.96974	100	OK	24494	10.6964
BURSTSTART	2016-09-25 13:10:04	20193	30.0011	5382	1.87187	100	OK	24691	10.7976		BURSTSTART	2016-09-25 13:13:04	20143	30.1154	7944	2.8244	100	OK	24492	10.6956
BURSTSTART	2016-09-25 13:15:04	20187	30.0112	4447	1.5152	100	OK	24690	10.7972		BURSTSTART	2016-09-25 13:18:04	20142	30.1171	7803	2.77062	100	OK	24491	10.6952
BURSTSTART	2016-09-25 13:20:04	20185	30.0145	5990	2.10381	100	OK	24689	10.7968		BURSTSTART	2016-09-25 13:23:04	20138	30.1238	9212	3.30811	100	OK	24494	10.6964
BURSTSTART	2016-09-25 13:25:04	20184	30.0162	5665	1.97983	100	OK	24691	10.7976		BURSTSTART	2016-09-25 13:28:04	20135	30.1288	8459	3.02086	100	OK	24493	10.696
BURSTSTART	2016-09-25 13:30:04	20181	30.0212	4800	1.64986	100	OK	24693	10.7985		BURSTSTART	2016-09-25 13:33:04	20137	30.1254	9645	3.47328	100	OK	24494	10.6964
BURSTSTART	2016-09-25 13:35:04	20181	30.0212	5908	2.07253	100	OK	24692	10.7981		BURSTSTART	2016-09-25 13:38:04	20137	30.1254	11992	4.36859	100	OK	24492	10.6956
BURSTSTART	2016-09-25 13:40:04	20180	30.0229	6137	2.15988	100	OK	24694	10.7989		BURSTSTART	2016-09-25 13:43:04	20137	30.1254	9735	3.50762	100	OK	24492	10.6956
BURSTSTART	2016-09-25 13:45:04	20175	30.0313	5970	2.09618	100	OK	24690	10.7972		BURSTSTART	2016-09-25 13:48:04	20147	30.1087	8529	3.04756	100	OK	24495	10.6969
BURSTSTART	2016-09-25 13:50:04	20174	30.033	6079	2.13776	100	OK	24693	10.7985		BURSTSTART	2016-09-25 13:53:04	20148	30.107	8683	3.10631	100	OK	24497	10.6977
BURSTSTART	2016-09-25 13:55:04	20177	30.0279	4449	1.51596	100	OK	24692	10.7981		BURSTSTART	2016-09-25 13:58:04	20143	30.1154	9846	3.54996	100	OK	24493	10.696
BURSTSTART	2016-09-25 14:00:04	20179	30.0246	6045	2.12479	100	OK	24691	10.7976		BURSTSTART	2016-09-25 14:03:04	20133	30.1322	11531	4.19274	100	OK	24492	10.6956
BURSTSTART	2016-09-25 14:05:04	20179	30.0246	8340	3.00026	100	OK	24691	10.7976		BURSTSTART	2016-09-25 14:08:04	20132	30.1338	9878	3.56217	100	OK	24491	10.6952
BURSTSTART	2016-09-25 14:10:04	20178	30.0263	7355	2.62451	100	OK	24690	10.7972		BURSTSTART	2016-09-25 14:13:04	20133	30.1322	10748	3.89405	100	OK	24493	10.696
BURSTSTART	2016-09-25 14:15:04	20181	30.0212	4586	1.56822	100	OK	24693	10.7985		BURSTSTART	2016-09-25 14:18:04	20131	30.1355	9773	3.52211	100	OK	24497	10.6977
BURSTSTART	2016-09-25 14:20:04	20182	30.0196	7066	2.51427	100	OK	24692	10.7981		BURSTSTART	2016-09-25 14:23:04	20130	30.1372	12079	4.40178	100	OK	24495	10.6969
BURSTSTART	2016-09-25 14:25:04	20182	30.0196	5013	1.73111	100	OK	24693	10.7985		BURSTSTART	2016-09-25 14:28:04	20133	30.1322	8829	3.16201	100	OK	24491	10.6952
BURSTSTART	2016-09-25 14:30:04	20171	30.038	6458	2.28233	100	OK	24693	10.7985		BURSTSTART	2016-09-25 14:33:04	20133	30.1322	8821	3.15895	100	OK	24493	10.696
BURSTSTART	2016-09-25 14:35:04	20167	30.0447	6659	2.35901	100	OK	24692	10.7981		BURSTSTART	2016-09-25 14:38:04	20124	30.1472	9475	3.40843	100	OK	24492	10.6956
BURSTSTART	2016-09-25 14:40:04	20166	30.0464	4481	1.52817	100	OK	24692	10.7981		BURSTSTART	2016-09-25 14:43:04	20113	30.1657	7644	2.70996	100	OK	24490	10.6948
BURSTSTART	2016-09-25 14:45:04	20167	30.0447	6444	2.27699	100	OK	24694	10.7989		BURSTSTART	2016-09-25 14:48:04	20113	30.1657	8174	2.91214	100	OK	24487	10.6935
BURSTSTART	2016-09-25 14:50:04	20166	30.0464	5628	1.96572	100	OK	24690	10.7972		BURSTSTART	2016-09-25 14:53:04	20113	30.1657	9356	3.36304	100	OK	24491	10.6952
BURSTSTART	2016-09-25 14:55:04	20164	30.0497	5031	1.73798	100	OK	24690	10.7972		BURSTSTART	2016-09-25 14:58:04	20118	30.1573	6605	2.31361	100	OK	24470	10.6864
BURSTSTART	2016-09-25 15:00:04	20166	30.0464	6589	2.33231	100	OK	24691	10.7976		BURSTSTART	2016-09-25 15:03:04	20115	30.1623	6676	2.3407	100	OK	24491	10.6952
BURSTSTART	2016-09-25 15:05:04	20163	30.0514	6057	2.12936	100	OK	24691	10.7976		BURSTSTART	2016-09-25 15:08:04	20113	30.1657	9366	3.36685	100	OK	24496	10.6973
BURSTSTART	2016-09-25 15:10:04	20163	30.0514	10088	3.66707	100	OK	24694	10.7989		BURSTSTART	2016-09-25 15:13:04	20117	30.159	10233	3.69759	100	OK	24494	10.6964
BURSTSTART	2016-09-25 15:15:04	20160	30.0564	9395	3.40271	100	OK	24693	10.7985		BURSTSTART	2016-09-25 15:18:04	20117	30.159	9884	3.56446	100	OK	24487	10.6935
BURSTSTART	2016-09-25 15:20:04	20163	30.0514	5519	1.92413	100	OK	24689	10.7968		BURSTSTART	2016-09-25 15:23:04	20116	30.1607	14515	5.33104	100	OK	24488	10.6939
BURSTSTART	2016-09-25 15:25:04	20161	30.0547	7091	2.5238	100	OK	24694	10.7989		BURSTSTART	2016-09-25 15:28:04	20115	30.1623	8897	3.18795	100	OK	24492	10.6956
BURSTSTART	2016-09-25 15:30:04	20162	30.0531	6617	2.34299	100	OK	24693	10.7985		BURSTSTART	2016-09-25 15:33:04	20114	30.164	9278	3.33329	100	OK	24488	10.6939
BURSTSTART	2016-09-25 15:35:04	20159	30.0581	13194	4.85192	100	OK	24694	10.7989		BURSTSTART	2016-09-25 15:38:04	20112	30.1674	8207	2.92473	100	OK	24491	10.6952
BURSTSTART	2016-09-25 15:40:04	20161	30.0547	6839	2.42767	100	OK	24696	10.7997		BURSTSTART	2016-09-25 15:43:04	20111	30.169	7645	2.71034	100	OK	24488	10.6939
BURSTSTART	2016-09-25 15:45:04	20164	30.0497	12319	4.51813	100	OK	24696	10.7997		BURSTSTART	2016-09-25 15:48:04	20111	30.169	8016	2.85187	100	OK	24487	10.6935
BURSTSTART	2016-09-25 15:50:04	20164	30.0497	9080	3.28255	100	OK	24697	10.8002		BURSTSTART	2016-09-25 15:53:04	20114	30.164	8825	3.16048	100	OK	24488	10.6939
BURSTSTART	2016-09-25 15:55:04	20162	30.0531	7665	2.74277	100	OK	24697	10.8002		BURSTSTART	2016-09-25 15:58:04	20127	30.1422	7912	2.8122	100	OK	24489	10.6944
BURSTSTART	2016-09-25 16:00:04	20162	30.0531	9327	3.37677	100	OK	24693	10.7985		BURSTSTART	2016-09-25 16:03:04	20129	30.1389	7840	2.78473	100	OK	24492	10.6956
BURSTSTART	2016-09-25 16:05:04	20156	30.0631	11711	4.2862	100	OK	24697	10.8002		BURSTSTART	2016-09-25 16:08:04	20135	30.1288	8050	2.86484	100	OK	24491	10.6952
BURSTSTART	2016-09-25 16:10:04	20157	30.0615	4930	1.69945	100	OK	24698	10.8006		BURSTSTART	2016-09-25 16:13:04	20138	30.1238	7733	2.74391	100	OK	24489	10.6944
BURSTSTART	2016-09-25 16:15:04	20158	30.0598	8240	2.96211	100	OK	24698	10.8006		BURSTSTART	2016-09-25 16:18:04	20137	30.1254	7517	2.66152	100	OK	24497	10.6977
BURSTSTART	2016-09-25 16:20:04	20158	30.0598	6034	2.12059	100	OK	24695	10.7993		BURSTSTART	2016-09-25 16:23:04	20137	30.1254	11470	4.16947	100	OK	24493	10.696
BURSTSTART	2016-09-25 16:25:04	20160	30.0564	6590	2.33269	100	OK	24693	10.7985		BURSTSTART	2016-09-25 16:28:04	20141	30.1187	9052	3.24707	100	OK	24490	10.6948
BURSTSTART	2016-09-25 16:30:04	20157	30.0615	5099	1.76392	100	OK	24698	10.8006		BURSTSTART	2016-09-25 16:33:04	20139	30.1221	9130	3.27683	100	OK	24500	10.699
BURSTSTART	2016-09-25 16:35:04	20158	30.0598	11704	4.28353	100	OK	24695	10.7993		BURSTSTART	2016-09-25 16:38:04	20133	30.1322	8233	2.93465	100	OK	24491	10.6952
BURSTSTART	2016-09-25 16:40:04	20156	30.0631	11737	4.29612	100	OK	24698	10.8006		BURSTSTART	2016-09-25 16:43:04	20135	30.1288	11196	4.06494	100	OK	24489	10.6944
BURSTSTART	2016-09-25 16:45:04	20157	30.0615	12894	4.73748	100	OK	24698	10.8006		BURSTSTART	2016-09-25 16:48:04	20131	30.1355	8532	3.04871	100	OK	24491	10.6952
BURSTSTART	2016-09-25 16:50:04	20157	30.0615	5182	1.79558	100	OK	24698	10.8006		BURSTSTART	2016-09-25 16:53:04	20129	30.1389	9239	3.31841	100	OK	24491	10.6952
BURSTSTART	2016-09-25 16:55:04	20157	30.0615	6801	2.41318	100	OK	24699	10.801		BURSTSTART	2016-09-25 16:58:04	20127	30.1422	9877	3.56178	100	OK	24488	10.6939
BURSTSTART	2016-09-25 17:00:04	20158	30.0598	12541	4.60282	100	OK	24695	10.7993		BURSTSTART	2016-09-25 17:03:04	20120	30.154	10399	3.76091	100	OK	24487	10.6935
BURSTSTART	2016-09-25 17:05:04	20160	30.0564	6898	2.45018	100	OK	24695	10.7993		BURSTSTART	2016-09-25 17:08:04	20115	30.1623	10066	3.63388	100	OK	24489	10.6944
BURSTSTART	2016-09-25 17:10:04	20158	30.0598	12118	4.44146	100	OK	24693	10.7985		BURSTSTART	2016-09-25 17:13:04	20115	30.1623	9901	3.57094	100	OK	24486	10.6931
BURSTSTART	2016-09-25 17:15:04	20161	30.0547	14332	5.28603	100	OK	24691	10.7976		BURSTSTART	2016-09-25 17:18:04	20121	30.1523	9212	3.30811	100	OK	24490	10.6948
BURSTSTART	2016-09-25 17:20:04	20162	30.0531	6850	2.43187	100	OK	24693	10.7985		BURSTSTART	2016-09-25 17:23:04	20124	30.1472	10087	3.64189	100	OK	24490	10.6948
BURSTSTART	2016-09-25 17:25:04	20163	30.0514	6769	2.40097	100	OK	24698	10.8006		BURSTSTART	2016-09-25 17:28:04	20124	30.1472	8996	3.22571	100	OK	24489	10.6944
BURSTSTART	2016-09-25 17:30:04	20159	30.0581	14994	5.53856	100	OK	24697	10.8002		BURSTSTART	2016-09-25 17:33:04	20127	30.1422	9351	3.36113	100	OK	24489	10.6944
BURSTSTART	2016-09-25 17:35:04	20160	30.0564	8025	2.8801	100	OK	24696	10.7997		BURSTSTART	2016-09-25 17:38:04	20126	30.1439	9414	3.38517	100	OK	24489	10.6944
BURSTSTART	2016-09-25 17:40:04	20160	30.0564	7535	2.69318	100	OK	24693	10.7985		BURSTSTART	2016-09-25 17:43:04	20121	30.1523	8300	2.96021	100	OK	24488	10.6939
BURSTSTART	2016-09-25 17:45:04	20163	30.0514	8818	3.1826	100	OK	24696	10.7997		BURSTSTART	2016-09-25 17:48:04	20121	30.1523	9245	3.3207	100	OK	24490	10.6948
BURSTSTART	2016-09-25 17:50:04	20163	30.0514	5414	1.88408	100	OK	24697	10.8002		BURSTSTART	2016-09-25 17:53:04	20120	30.154	9494	3.41568	100	OK	24490	10.6948
BURSTSTART	2016-09-25 17:55:04	20163	30.0514	8636	3.11318	100	OK	24697	10.8002		BURSTSTART	2016-09-25 17:58:04	20118	30.1573	8436	3.01209	100	OK	24492	10.6956
BURSTSTART	2016-09-25 18:00:04	20161	30.0547	5697	1.99204	100	OK	24694	10.7989		BURSTSTART	2016-09-25 18:03:04	20113	30.1657	9336	3.35541	100	OK	24490	10.6948
BURSTSTART	2016-09-25 18:05:04	20160	30.0564	6850	2.43187	100	OK	24694	10.7989		BURSTSTART	2016-09-25 18:08:04	20110	30.1707	10102	3.64762	100	OK	24488	10.6939
BURSTSTART	2016-09-25 18:10:04	20161	30.0547	6594	2.33421	100	OK	24695	10.7993		BURSTSTART	2016-09-25 18:13:04	20107	30.1758	10938	3.96652	100	OK	24489	10.6944
BURSTSTART	2016-09-25 18:15:04	20159	30.0581	5189	1.79825	100	OK	24696	10.7997		BURSTSTART	2016-09-25 18:18:04	20103	30.1825	9912	3.57514	100	OK	24487	10.6935
BURSTSTART	2016-09-25 18:20:04	20162	30.0531	9272	3.35579	100	OK	24698	10.8006		BURSTSTART	2016-09-25 18:23:04	20097	30.1925	10239	3.69988	100	OK	24486	10.6931
BURSTSTART	2016-09-25 18:25:04	20164	30.0497	6477	2.28958	100	OK	24693	10.7985		BURSTSTART	2016-09-25 18:28:04	20095	30.1959	9500	3.41797	100	OK	24487	10.6935
BURSTSTART	2016-09-25 18:30:04	20165	30.048	5998	2.10686	100	OK	24697	10.8002		BURSTSTART	2016-09-25 18:33:04	20097	30.1925	10303	3.72429	100	OK	24492	10.6956
BURSTSTART	2016-09-25 18:35:04	20167	30.0447	6955	2.47193	100	OK	24697	10.8002		BURSTSTART	2016-09-25 18:38:04	20108	30.1741	9876	3.5614	100	OK	24492	10.6956
BURSTSTART	2016-09-25 18:40:04	20169	30.0413	6489	2.29416	100	OK	24694	10.7989		BURSTSTART	2016-09-25 18:43:04	20101	30.1858	9021	3.23525	100	OK	24489	10.6944
BURSTSTART	2016-09-25 18:45:04	20170	30.0397	6904	2.45247	100	OK	24695	10.7993		BURSTSTART	2016-09-25 18:48:04	20098	30.1909	10367	3.74871	100	OK	24487	10.6935
BURSTSTART	2016-09-25 18:50:04	20174	30.033	5981	2.10037	100	OK	24697	10.8002		BURSTSTART	2016-09-25 18:53:04	20096	30.1942	11124	4.03748	100	OK	24495	10.6969
BURSTSTART	2016-09-25 18:55:04	20176	30.0296	9117	3.29666	100	OK	24692	10.7981		BURSTSTART	2016-09-25 18:58:04	20090	30.2043	8447	3.01628	100	OK	24488	10.6939
BURSTSTART	2016-09-25 19:00:04	20179	30.0246	9779	3.5492	100	OK	24695	10.7993		BURSTSTART	2016-09-25 19:03:04	20091	30.2026	10958	3.97415	100	OK	24490	10.6948
BURSTSTART	2016-09-25 19:05:04	20184	30.0162	7441	2.65732	100	OK	24694	10.7989		BURSTSTART	2016-09-25 19:08:04	20088	30.2077	9188	3.29895	100	OK	24485	10.6927
BURSTSTART	2016-09-25 19:10:04	20187	30.0112	5698	1.99242	100	OK	24690	10.7972		BURSTSTART	2016-09-25 19:13:04	20087	30.2093	13996	5.13306	100	OK	24485	10.6927
BURSTSTART	2016-09-25 19:15:04	20190	30.0062	5248	1.82076	100	OK	24690	10.7972		BURSTSTART	2016-09-25 19:18:04	20084	30.2144	6742	2.36588	100	OK	24486	10.6931
BURSTSTART	2016-09-25 19:20:04	20190	30.0062	44047	16.6214	100	OK	24687	10.796		BURSTSTART	2016-09-25 19:23:04	20089	30.206	12276	4.47693	100	OK	24487	10.6935
BURSTSTART	2016-09-25 19:25:04	20190	30.0062	50420	19.0525	100	OK	24690	10.7972		BURSTSTART	2016-09-25 19:28:04	20098	30.1909	11138	4.04282	100	OK	24464	10.6839
BURSTSTART	2016-09-25 19:30:04	20191	30.0045	9791	3.55377	100	OK	24691	10.7976		BURSTSTART	2016-09-25 19:33:04	20097	30.1925	9139	3.28026	100	OK	24490	10.6948
BURSTSTART	2016-09-25 19:35:04	20191	30.0045	10099	3.67127	100	OK	24690	10.7972		BURSTSTART	2016-09-25 19:38:04	20096	30.1942	7064	2.48871	100	OK	24493	10.696
BURSTSTART	2016-09-25 19:40:04	20193	30.0011	13617	5.01328	100	OK	24691	10.7976		BURSTSTART	2016-09-25 19:43:04	20095	30.1959	10099	3.64647	100	OK	24492	10.6956
BURSTSTART	2016-09-25 19:45:04	20193	30.0011	7712	2.7607	100	OK	24690	10.7972		BURSTSTART	2016-09-25 19:48:04	20092	30.2009	18478	6.84281	100	OK	24486	10.6931
BURSTSTART	2016-09-25 19:50:04	20195	29.9978	8514	3.06664	100	OK	24683	10.7943		BURSTSTART	2016-09-25 19:53:04	20089	30.206	10522	3.80783	100	OK	24489	10.6944
BURSTSTART	2016-09-25 19:55:04	20196	29.9961	9756	3.54042	100	OK	24687	10.796		BURSTSTART	2016-09-25 19:58:04	20090	30.2043	30016	11.2442	100	OK	24485	10.6927
BURSTSTART	2016-09-25 20:00:04	20196	29.9961	22833	8.52891	100	OK	24687	10.796		BURSTSTART	2016-09-25 20:03:04	20085	30.2127	9538	3.43247	100	OK	24489	10.6944
BURSTSTART	2016-09-25 20:05:04	20197	29.9944	14460	5.33486	100	OK	24688	10.7964		BURSTSTART	2016-09-25 20:08:04	20087	30.2093	34440	12.9318	100	OK	24485	10.6927
BURSTSTART	2016-09-25 20:10:04	20196	29.9961	47987	18.1244	100	OK	24688	10.7964		BURSTSTART	2016-09-25 20:13:04	20085	30.2127	6208	2.16217	100	OK	24489	10.6944
BURSTSTART	2016-09-25 20:15:04	20192	30.0028	64520	24.4312	100	SAT	24683	10.7943		BURSTSTART	2016-09-25 20:18:04	20085	30.2127	6869	2.41432	100	OK	24486	10.6931
BURSTSTART	2016-09-25 20:20:04	20194	29.9995	59717	22.599	100	OK	24686	10.7955		BURSTSTART	2016-09-25 20:23:04	20095	30.1959	7025	2.47383	100	OK	24486	10.6931
BURSTSTART	2016-09-25 20:25:04	20194	29.9995	19558	7.27959	100	OK	24688	10.7964		BURSTSTART	2016-09-25 20:28:04	20134	30.1305	6631	2.32353	100	OK	24489	10.6944
BURSTSTART	2016-09-25 20:30:04	20192	30.0028	4238	1.43547	100	OK	24690	10.7972		BURSTSTART	2016-09-25 20:33:04	20147	30.1087	5507	1.89476	100	OK	24493	10.696
BURSTSTART	2016-09-25 20:35:04	20192	30.0028	11751	4.30146	100	OK	24688	10.7964		BURSTSTART	2016-09-25 20:38:04	20147	30.1087	9195	3.30162	100	OK	24493	10.696
BURSTSTART	2016-09-25 20:40:04	20194	29.9995	13171	4.84314	100	OK	24691	10.7976		BURSTSTART	2016-09-25 20:43:04	20147	30.1087	7413	2.62184	100	OK	24491	10.6952
BURSTSTART	2016-09-25 20:45:04	20191	30.0045	14910	5.50652	100	OK	24687	10.796		BURSTSTART	2016-09-25 20:48:04	20149	30.1053	8178	2.91367	100	OK	24493	10.696
BURSTSTART	2016-09-25 20:50:04	20192	30.0028	4648	1.59187	100	OK	24689	10.7968		BURSTSTART	2016-09-25 20:53:04	20151	30.102	7618	2.70004	100	OK	24493	10.696
BURSTSTART	2016-09-25 20:55:04	20192	30.0028	16372	6.06423	100	OK	24689	10.7968		BURSTSTART	2016-09-25 20:58:04	20151	30.102	6495	2.27165	100	OK	24495	10.6969
BURSTSTART	2016-09-25 21:00:04	20193	30.0011	19126	7.1148	100	OK	24687	10.796		BURSTSTART	2016-09-25 21:03:04	20152	30.1003	33231	12.4706	100	OK	24491	10.6952
BURSTSTART	2016-09-25 21:05:04	20180	30.0229	5594	1.95274	100	OK	24689	10.7968		BURSTSTART	2016-09-25 21:08:04	20146	30.1104	12618	4.6074	100	OK	24489	10.6944
BURSTSTART	2016-09-25 21:10:04	20179	30.0246	5968	2.09542	100	OK	24693	10.7985		BURSTSTART	2016-09-25 21:13:04	20146	30.1104	6594	2.30942	100	OK	24491	10.6952
BURSTSTART	2016-09-25 21:15:04	20182	30.0196	11301	4.12979	100	OK	24692	10.7981		BURSTSTART	2016-09-25 21:18:04	20147	30.1087	5516	1.8982	100	OK	24491	10.6952
BURSTSTART	2016-09-25 21:20:04	20161	30.0547	17280	6.4106	100	OK	24693	10.7985		BURSTSTART	2016-09-25 21:23:04	20153	30.0986	6596	2.31018	100	OK	24487	10.6935
BURSTSTART	2016-09-25 21:25:04	20143	30.0849	5069	1.75247	100	OK	24691	10.7976		BURSTSTART	2016-09-25 21:28:04	20156	30.0936	4792	1.62201	100	OK	24489	10.6944
BURSTSTART	2016-09-25 21:30:04	20140	30.09	7383	2.63519	100	OK	24693	10.7985		BURSTSTART	2016-09-25 21:33:04	20159	30.0886	4896	1.66168	100	OK	24495	10.6969
BURSTSTART	2016-09-25 21:35:04	20138	30.0933	15258	5.63927	100	OK	24694	10.7989		BURSTSTART	2016-09-25 21:38:04	20159	30.0886	4498	1.50986	100	OK	24491	10.6952
BURSTSTART	2016-09-25 21:40:04	20138	30.0933	17036	6.31752	100	OK	24695	10.7993		BURSTSTART	2016-09-25 21:43:04	20159	30.0886	4057	1.34163	100	OK	24491	10.6952
BURSTSTART	2016-09-25 21:45:04	20139	30.0916	6498	2.29759	100	OK	24697	10.8002		BURSTSTART	2016-09-25 21:48:04	20156	30.0936	3787	1.23863	100	OK	24491	10.6952
BURSTSTART	2016-09-25 21:50:04	20140	30.09	15310	5.65911	100	OK	24698	10.8006		BURSTSTART	2016-09-25 21:53:04	20156	30.0936	7101	2.50283	100	OK	24492	10.6956
BURSTSTART	2016-09-25 21:55:04	20138	30.0933	5715	1.9989	100	OK	24694	10.7989		BURSTSTART	2016-09-25 21:58:04	20154	30.097	7209	2.54402	100	OK	24492	10.6956
BURSTSTART	2016-09-25 22:00:04	20139	30.0916	5372	1.86806	100	OK	24693	10.7985		BURSTSTART	2016-09-25 22:03:04	20155	30.0953	7983	2.83928	100	OK	24494	10.6964
BURSTSTART	2016-09-25 22:05:04	20140	30.09	11982	4.38957	100	OK	24696	10.7997		BURSTSTART	2016-09-25 22:08:04	20154	30.097	9640	3.47138	100	OK	24489	10.6944
BURSTSTART	2016-09-25 22:10:04	20142	30.0866	9235	3.34168	100	OK	24698	10.8006		BURSTSTART	2016-09-25 22:13:04	20152	30.1003	7747	2.74925	100	OK	24491	10.6952
BURSTSTART	2016-09-25 22:15:04	20142	30.0866	28377	10.6438	100	OK	24698	10.8006		BURSTSTART	2016-09-25 22:18:04	20152	30.1003	8166	2.90909	100	OK	24491	10.6952
BURSTSTART	2016-09-25 22:20:04	20140	30.09	5464	1.90315	100	OK	24696	10.7997		BURSTSTART	2016-09-25 22:23:04	20155	30.0953	11228	4.07715	100	OK	24489	10.6944
BURSTSTART	2016-09-25 22:25:04	20142	30.0866	33763	12.6984	100	OK	24697	10.8002		BURSTSTART	2016-09-25 22:28:04	20153	30.0986	9066	3.25241	100	OK	24491	10.6952
BURSTSTART	2016-09-25 22:30:04	20141	30.0883	6676	2.3655	100	OK	24695	10.7993		BURSTSTART	2016-09-25 22:33:04	20152	30.1003	19940	7.40052	100	OK	24487	10.6935
BURSTSTART	2016-09-25 22:35:04	20141	30.0883	23460	8.76809	100	OK	24693	10.7985		BURSTSTART	2016-09-25 22:38:04	20152	30.1003	6753	2.37007	100	OK	24489	10.6944
BURSTSTART	2016-09-25 22:40:04	20144	30.0833	4066	1.36986	100	OK	24697	10.8002		BURSTSTART	2016-09-25 22:43:04	20153	30.0986	7167	2.528	100	OK	24492	10.6956
BURSTSTART	2016-09-25 22:45:04	20143	30.0849	6191	2.18048	100	OK	24696	10.7997		BURSTSTART	2016-09-25 22:48:04	20151	30.102	9797	3.53127	100	OK	24491	10.6952
BURSTSTART	2016-09-25 22:50:04	20145	30.0816	10927	3.98712	100	OK	24697	10.8002		BURSTSTART	2016-09-25 22:53:04	20152	30.1003	4733	1.5995	100	OK	24490	10.6948
BURSTSTART	2016-09-25 22:55:04	20145	30.0816	13393	4.92783	100	OK	24694	10.7989		BURSTSTART	2016-09-25 22:58:04	20152	30.1003	5011	1.70555	100	OK	24488	10.6939
BURSTSTART	2016-09-25 23:00:04	20144	30.0833	16936	6.27938	100	OK	24696	10.7997		BURSTSTART	2016-09-25 23:03:04	20149	30.1053	5358	1.83792	100	OK	24489	10.6944
BURSTSTART	2016-09-25 23:05:04	20147	30.0782	15913	5.88913	100	OK	24697	10.8002		BURSTSTART	2016-09-25 23:08:04	20152	30.1003	4592	1.54572	100	OK	24492	10.6956
BURSTSTART	2016-09-25 23:10:04	20144	30.0833	7494	2.67754	100	OK	24694	10.7989		BURSTSTART	2016-09-25 23:13:04	20152	30.1003	10837	3.928	100	OK	24489	10.6944
BURSTSTART	2016-09-25 23:15:04	20147	30.0782	5858	2.05345	100	OK	24696	10.7997		BURSTSTART	2016-09-25 23:18:04	20151	30.102	9699	3.49388	100	OK	24488	10.6939
BURSTSTART	2016-09-25 23:20:04	20145	30.0816	15348	5.6736	100	OK	24694	10.7989		BURSTSTART	2016-09-25 23:23:04	20150	30.1037	4125	1.36757	100	OK	24491	10.6952
BURSTSTART	2016-09-25 23:25:04	20145	30.0816	10275	3.73841	100	OK	24694	10.7989		BURSTSTART	2016-09-25 23:28:04	20149	30.1053	4255	1.41716	100	OK	24490	10.6948
BURSTSTART	2016-09-25 23:30:04	20147	30.0782	7126	2.53716	100	OK	24693	10.7985		BURSTSTART	2016-09-25 23:33:04	20150	30.1037	4365	1.45912	100	OK	24493	10.696
BURSTSTART	2016-09-25 23:35:04	20147	30.0782	3605	1.194	100	OK	24693	10.7985		BURSTSTART	2016-09-25 23:38:04	20149	30.1053	4516	1.51673	100	OK	24489	10.6944
BURSTSTART	2016-09-25 23:40:04	20148	30.0766	3239	1.05438	100	OK	24693	10.7985		BURSTSTART	2016-09-25 23:43:04	20151	30.102	7648	2.71149	100	OK	24489	10.6944
BURSTSTART	2016-09-25 23:45:04	20148	30.0766	14311	5.27802	100	OK	24693	10.7985		BURSTSTART	2016-09-25 23:48:04	20148	30.107	8141	2.89955	100	OK	24488	10.6939
BURSTSTART	2016-09-25 23:50:04	20148	30.0766	3324	1.08681	100	OK	24697	10.8002		BURSTSTART	2016-09-25 23:53:04	20148	30.107	4084	1.35193	100	OK	24490	10.6948
BURSTSTART	2016-09-25 23:55:04	20150	30.0732	3580	1.18446	100	OK	24692	10.7981		BURSTSTART	2016-09-25 23:58:04	20149	30.1053	5648	1.94855	100	OK	24494	10.6964
BURSTSTART	2016-09-26 00:00:04	20148	30.0766	3954	1.32713	100	OK	24692	10.7981		BURSTSTART	2016-09-26 00:03:04	20147	30.1087	4770	1.61362	100	OK	24488	10.6939
BURSTSTART	2016-09-26 00:05:04	20152	30.0698	3639	1.20697	100	OK	24697	10.8002		BURSTSTART	2016-09-26 00:08:04	20147	30.1087	4761	1.61018	100	OK	24490	10.6948
BURSTSTART	2016-09-26 00:10:04	20150	30.0732	8439	3.03803	100	OK	24696	10.7997		BURSTSTART	2016-09-26 00:13:04	20146	30.1104	4974	1.69144	100	OK	24490	10.6948
BURSTSTART	2016-09-26 00:15:04	20154	30.0665	53397	20.1882	100	OK	24670	10.7888		BURSTSTART	2016-09-26 00:18:04	20146	30.1104	4225	1.40572	100	OK	24486	10.6931
BURSTSTART	2016-09-26 00:20:04	20153	30.0682	3163	1.02539	100	OK	24695	10.7993		BURSTSTART	2016-09-26 00:23:04	20145	30.112	4336	1.44806	100	OK	24488	10.6939
BURSTSTART	2016-09-26 00:25:04	20154	30.0665	4335	1.47247	100	OK	24693	10.7985		BURSTSTART	2016-09-26 00:28:04	20145	30.112	5670	1.95694	100	OK	24488	10.6939
BURSTSTART	2016-09-26 00:30:04	20156	30.0631	21013	7.83463	100	OK	24698	10.8006		BURSTSTART	2016-09-26 00:33:04	20143	30.1154	4895	1.6613	100	OK	24488	10.6939
BURSTSTART	2016-09-26 00:35:04	20154	30.0665	16824	6.23665	100	OK	24692	10.7981		BURSTSTART	2016-09-26 00:38:04	20140	30.1204	5006	1.70365	100	OK	24488	10.6939
BURSTSTART	2016-09-26 00:40:04	20153	30.0682	4029	1.35574	100	OK	24693	10.7985		BURSTSTART	2016-09-26 00:43:04	20135	30.1288	4880	1.65558	100	OK	24490	10.6948
BURSTSTART	2016-09-26 00:45:04	20158	30.0598	3856	1.28975	100	OK	24697	10.8002		BURSTSTART	2016-09-26 00:48:04	20134	30.1305	6819	2.39525	100	OK	24488	10.6939
BURSTSTART	2016-09-26 00:50:04	20158	30.0598	21975	8.20161	100	OK	24692	10.7981		BURSTSTART	2016-09-26 00:53:04	20132	30.1338	9502	3.41873	100	OK	24493	10.696
BURSTSTART	2016-09-26 00:55:04	20156	30.0631	26355	9.87244	100	OK	24693	10.7985		BURSTSTART	2016-09-26 00:58:04	20133	30.1322	7807	2.77214	100	OK	24486	10.6931
BURSTSTART	2016-09-26 01:00:04	20155	30.0648	3499	1.15356	100	OK	24697	10.8002		BURSTSTART	2016-09-26 01:03:04	20128	30.1405	7498	2.65427	100	OK	24486	10.6931
BURSTSTART	2016-09-26 01:05:04	20154	30.0665	10338	3.76244	100	OK	24694	10.7989		BURSTSTART	2016-09-26 01:08:04	20130	30.1372	6429	2.24648	100	OK	24490	10.6948
BURSTSTART	2016-09-26 01:10:04	20148	30.0766	4165	1.40762	100	OK	24696	10.7997		BURSTSTART	2016-09-26 01:13:04	20133	30.1322	7942	2.82364	100	OK	24484	10.6923
BURSTSTART	2016-09-26 01:15:04	20147	30.0782	4979	1.71814	100	OK	24697	10.8002		BURSTSTART	2016-09-26 01:18:04	20132	30.1338	9317	3.34816	100	OK	24485	10.6927
BURSTSTART	2016-09-26 01:20:04	20147	30.0782	13523	4.97742	100	OK	24696	10.7997		BURSTSTART	2016-09-26 01:23:04	20132	30.1338	4380	1.46484	100	OK	24483	10.6918
BURSTSTART	2016-09-26 01:25:04	20149	30.0749	4770	1.63841	100	OK	24696	10.7997		BURSTSTART	2016-09-26 01:28:04	20129	30.1389	6399	2.23503	100	OK	24485	10.6927
BURSTSTART	2016-09-26 01:30:04	20147	30.0782	4751	1.63117	100	OK	24695	10.7993		BURSTSTART	2016-09-26 01:33:04	20134	30.1305	7233	2.55318	100	OK	24484	10.6923
BURSTSTART	2016-09-26 01:35:04	20147	30.0782	20904	7.79305	100	OK	24697	10.8002		BURSTSTART	2016-09-26 01:38:04	20134	30.1305	5219	1.7849	100	OK	24487	10.6935
BURSTSTART	2016-09-26 01:40:04	20147	30.0782	12816	4.70772	100	OK	24696	10.7997		BURSTSTART	2016-09-26 01:43:04	20136	30.1271	7293	2.57607	100	OK	24486	10.6931
BURSTSTART	2016-09-26 01:45:04	20146	30.0799	6291	2.21863	100	OK	24697	10.8002		BURSTSTART	2016-09-26 01:48:04	20134	30.1305	10853	3.9341	100	OK	24493	10.696
BURSTSTART	2016-09-26 01:50:04	20146	30.0799	6072	2.13509	100	OK	24698	10.8006		BURSTSTART	2016-09-26 01:53:04	20135	30.1288	5045	1.71852	100	OK	24493	10.696
BURSTSTART	2016-09-26 01:55:04	20146	30.0799	14779	5.45655	100	OK	24698	10.8006		BURSTSTART	2016-09-26 01:58:04	20136	30.1271	11198	4.06571	100	OK	24489	10.6944
BURSTSTART	2016-09-26 02:00:04	20145	30.0816	5092	1.76125	100	OK	24696	10.7997		BURSTSTART	2016-09-26 02:03:04	20135	30.1288	20758	7.71256	100	OK	24485	10.6927
BURSTSTART	2016-09-26 02:05:04	20145	30.0816	6056	2.12898	100	OK	24696	10.7997		BURSTSTART	2016-09-26 02:08:04	20135	30.1288	8529	3.04756	100	OK	24488	10.6939
BURSTSTART	2016-09-26 02:10:04	20146	30.0799	14665	5.41306	100	OK	24699	10.801		BURSTSTART	2016-09-26 02:13:04	20137	30.1254	8164	2.90833	100	OK	24486	10.6931
BURSTSTART	2016-09-26 02:15:04	20146	30.0799	19351	7.20063	100	OK	24697	10.8002		BURSTSTART	2016-09-26 02:18:04	20136	30.1271	7544	2.67182	100	OK	24486	10.6931
BURSTSTART	2016-09-26 02:20:04	20146	30.0799	10186	3.70445	100	OK	24694	10.7989		BURSTSTART	2016-09-26 02:23:04	20137	30.1254	7989	2.84157	100	OK	24487	10.6935
BURSTSTART	2016-09-26 02:25:04	20143	30.0849	23916	8.94204	100	OK	24698	10.8006		BURSTSTART	2016-09-26 02:28:04	20140	30.1204	10843	3.93029	100	OK	24489	10.6944
BURSTSTART	2016-09-26 02:30:04	20144	30.0833	4819	1.65711	100	OK	24699	10.801		BURSTSTART	2016-09-26 02:33:04	20142	30.1171	49743	18.7695	100	OK	24489	10.6944
BURSTSTART	2016-09-26 02:35:04	20142	30.0866	9162	3.31383	100	OK	24694	10.7989		BURSTSTART	2016-09-26 02:38:04	20139	30.1221	5185	1.77193	100	OK	24488	10.6939
BURSTSTART	2016-09-26 02:40:04	20145	30.0816	11491	4.20227	100	OK	24694	10.7989		BURSTSTART	2016-09-26 02:43:04	20141	30.1187	5145	1.75667	100	OK	24487	10.6935
BURSTSTART	2016-09-26 02:45:04	20143	30.0849	7314	2.60887	100	OK	24698	10.8006		BURSTSTART	2016-09-26 02:48:04	20142	30.1171	17334	6.40641	100	OK	24487	10.6935
BURSTSTART	2016-09-26 02:50:04	20143	30.0849	6601	2.33689	100	OK	24698	10.8006		BURSTSTART	2016-09-26 02:53:04	20143	30.1154	6051	2.10228	100	OK	24487	10.6935
BURSTSTART	2016-09-26 02:55:04	20144	30.0833	6291	2.21863	100	OK	24697	10.8002		BURSTSTART	2016-09-26 02:58:04	20142	30.1171	5143	1.75591	100	OK	24488	10.6939
BURSTSTART	2016-09-26 03:00:04	20144	30.0833	9544	3.45955	100	OK	24695	10.7993		BURSTSTART	2016-09-26 03:03:04	20143	30.1154	6286	2.19193	100	OK	24492	10.6956
BURSTSTART	2016-09-26 03:05:04	20142	30.0866	8069	2.89688	100	OK	24697	10.8002		BURSTSTART	2016-09-26 03:08:04	20145	30.112	5334	1.82877	100	OK	24487	10.6935
BURSTSTART	2016-09-26 03:10:04	20142	30.0866	6007	2.11029	100	OK	24695	10.7993		BURSTSTART	2016-09-26 03:13:04	20146	30.1104	5590	1.92642	100	OK	24488	10.6939
BURSTSTART	2016-09-26 03:15:04	20143	30.0849	10665	3.88718	100	OK	24699	10.801		BURSTSTART	2016-09-26 03:18:04	20147	30.1087	7436	2.63062	100	OK	24484	10.6923
BURSTSTART	2016-09-26 03:20:04	20145	30.0816	8184	2.94075	100	OK	24698	10.8006		BURSTSTART	2016-09-26 03:23:04	20152	30.1003	5023	1.71013	100	OK	24488	10.6939
BURSTSTART	2016-09-26 03:25:04	20146	30.0799	8763	3.16162	100	OK	24698	10.8006		BURSTSTART	2016-09-26 03:28:04	20154	30.097	5177	1.76888	100	OK	24487	10.6935
BURSTSTART	2016-09-26 03:30:04	20144	30.0833	7628	2.72865	100	OK	24695	10.7993		BURSTSTART	2016-09-26 03:33:04	20160	30.0869	6034	2.0958	100	OK	24488	10.6939
BURSTSTART	2016-09-26 03:35:04	20142	30.0866	9457	3.42636	100	OK	24698	10.8006		BURSTSTART	2016-09-26 03:38:04	20158	30.0903	5082	1.73264	100	OK	24487	10.6935
BURSTSTART	2016-09-26 03:40:04	20143	30.0849	10818	3.94554	100	OK	24698	10.8006		BURSTSTART	2016-09-26 03:43:04	20161	30.0852	5069	1.72768	100	OK	24488	10.6939
BURSTSTART	2016-09-26 03:45:04	20143	30.0849	7043	2.50549	100	OK	24699	10.801		BURSTSTART	2016-09-26 03:48:04	20161	30.0852	9151	3.28484	100	OK	24487	10.6935
BURSTSTART	2016-09-26 03:50:04	20140	30.09	6780	2.40517	100	OK	24699	10.801		BURSTSTART	2016-09-26 03:53:04	20167	30.0752	6922	2.43454	100	OK	24489	10.6944
BURSTSTART	2016-09-26 03:55:04	20142	30.0866	6408	2.26326	100	OK	24698	10.8006		BURSTSTART	2016-09-26 03:58:04	20166	30.0769	9335	3.35503	100	OK	24488	10.6939
BURSTSTART	2016-09-26 04:00:04	20140	30.09	8438	3.03765	100	OK	24696	10.7997		BURSTSTART	2016-09-26 04:03:04	20174	30.0635	6443	2.25182	100	OK	24488	10.6939
BURSTSTART	2016-09-26 04:05:04	20142	30.0866	7602	2.71874	100	OK	24697	10.8002		BURSTSTART	2016-09-26 04:08:04	20179	30.0551	5503	1.89324	100	OK	24489	10.6944
BURSTSTART	2016-09-26 04:10:04	20139	30.0916	7710	2.75994	100	OK	24699	10.801		BURSTSTART	2016-09-26 04:13:04	20179	30.0551	5433	1.86653	100	OK	24491	10.6952
BURSTSTART	2016-09-26 04:15:04	20139	30.0916	8672	3.12691	100	OK	24698	10.8006		BURSTSTART	2016-09-26 04:18:04	20181	30.0517	5051	1.72081	100	OK	24490	10.6948
BURSTSTART	2016-09-26 04:20:04	20140	30.09	8121	2.91672	100	OK	24699	10.801		BURSTSTART	2016-09-26 04:23:04	20182	30.0501	5240	1.79291	100	OK	24466	10.6847
BURSTSTART	2016-09-26 04:25:04	20139	30.0916	7353	2.62375	100	OK	24699	10.801		BURSTSTART	2016-09-26 04:28:04	20184	30.0467	5707	1.97106	100	OK	24499	10.6985
BURSTSTART	2016-09-26 04:30:04	20142	30.0866	7108	2.53029	100	OK	24698	10.8006		BURSTSTART	2016-09-26 04:33:04	20184	30.0467	5161	1.76277	100	OK	24494	10.6964
BURSTSTART	2016-09-26 04:35:04	20139	30.0916	7266	2.59056	100	OK	24698	10.8006		BURSTSTART	2016-09-26 04:38:04	20185	30.0451	6073	2.11067	100	OK	24489	10.6944
BURSTSTART	2016-09-26 04:40:04	20140	30.09	7995	2.86865	100	OK	24699	10.801		BURSTSTART	2016-09-26 04:43:04	20185	30.0451	5226	1.78757	100	OK	24490	10.6948
BURSTSTART	2016-09-26 04:45:04	20139	30.0916	7017	2.49558	100	OK	24688	10.7964		BURSTSTART	2016-09-26 04:48:04	20188	30.04	5382	1.84708	100	OK	24491	10.6952
BURSTSTART	2016-09-26 04:50:04	20137	30.095	8748	3.1559	100	OK	24699	10.801		BURSTSTART	2016-09-26 04:53:04	20190	30.0367	5235	1.791	100	OK	24495	10.6969
BURSTSTART	2016-09-26 04:55:04	20138	30.0933	9201	3.32871	100	OK	24698	10.8006		BURSTSTART	2016-09-26 04:58:04	20200	30.02	6649	2.3304	100	OK	24492	10.6956
BURSTSTART	2016-09-26 05:00:04	20140	30.09	8346	3.00255	100	OK	24696	10.7997		BURSTSTART	2016-09-26 05:03:04	20200	30.02	5666	1.95541	100	OK	24493	10.696
BURSTSTART	2016-09-26 05:05:04	20140	30.09	9118	3.29704	100	OK	24699	10.801		BURSTSTART	2016-09-26 05:08:04	20199	30.0216	5444	1.87073	100	OK	24498	10.6981
BURSTSTART	2016-09-26 05:10:04	20138	30.0933	12293	4.50821	100	OK	24697	10.8002		BURSTSTART	2016-09-26 05:13:04	20201	30.0183	6807	2.39067	100	OK	24490	10.6948
BURSTSTART	2016-09-26 05:15:04	20140	30.09	7000	2.48909	100	OK	24698	10.8006		BURSTSTART	2016-09-26 05:18:04	20206	30.0099	5790	2.00272	100	OK	24500	10.699
BURSTSTART	2016-09-26 05:20:04	20140	30.09	8279	2.97699	100	OK	24699	10.801		BURSTSTART	2016-09-26 05:23:04	20206	30.0099	5385	1.84822	100	OK	24495	10.6969
BURSTSTART	2016-09-26 05:25:04	20141	30.0883	10183	3.70331	100	OK	24698	10.8006		BURSTSTART	2016-09-26 05:28:04	20207	30.0082	5999	2.08244	100	OK	24503	10.7002
BURSTSTART	2016-09-26 05:30:04	20140	30.09	11767	4.30756	100	OK	24695	10.7993		BURSTSTART	2016-09-26 05:33:04	20208	30.0066	6480	2.26593	100	OK	24493	10.696
BURSTSTART	2016-09-26 05:35:04	20140	30.09	12031	4.40827	100	OK	24698	10.8006		BURSTSTART	2016-09-26 05:38:04	20209	30.0049	6102	2.12174	100	OK	24490	10.6948
BURSTSTART	2016-09-26 05:40:04	20139	30.0916	7001	2.48947	100	OK	24697	10.8002		BURSTSTART	2016-09-26 05:43:04	20206	30.0099	5478	1.8837	100	OK	24496	10.6973
BURSTSTART	2016-09-26 05:45:04	20138	30.0933	9084	3.28408	100	OK	24696	10.7997		BURSTSTART	2016-09-26 05:48:04	20201	30.0183	6550	2.29264	100	OK	24500	10.699
BURSTSTART	2016-09-26 05:50:04	20137	30.095	13442	4.94652	100	OK	24696	10.7997		BURSTSTART	2016-09-26 05:53:04	20205	30.0116	6077	2.1122	100	OK	24495	10.6969
BURSTSTART	2016-09-26 05:55:04	20138	30.0933	14161	5.2208	100	OK	24697	10.8002		BURSTSTART	2016-09-26 05:58:04	20202	30.0166	6281	2.19002	100	OK	24493	10.696
BURSTSTART	2016-09-26 06:00:04	20137	30.095	11135	4.06647	100	OK	24695	10.7993		BURSTSTART	2016-09-26 06:03:04	20202	30.0166	6858	2.41013	100	OK	24494	10.6964
BURSTSTART	2016-09-26 06:05:04	20138	30.0933	14667	5.41382	100	OK	24695	10.7993		BURSTSTART	2016-09-26 06:08:04	20203	30.0149	6394	2.23312	100	OK	24498	10.6981
BURSTSTART	2016-09-26 06:10:04	20138	30.0933	12611	4.62952	100	OK	24695	10.7993		BURSTSTART	2016-09-26 06:13:04	20203	30.0149	8285	2.95449	100	OK	24490	10.6948
BURSTSTART	2016-09-26 06:15:04	20138	30.0933	13506	4.97093	100	OK	24696	10.7997		BURSTSTART	2016-09-26 06:18:04	20206	30.0099	5785	2.00081	100	OK	24492	10.6956
BURSTSTART	2016-09-26 06:20:04	20136	30.0967	7482	2.67296	100	OK	24696	10.7997		BURSTSTART	2016-09-26 06:23:04	20206	30.0099	5007	1.70403	100	OK	24499	10.6985
BURSTSTART	2016-09-26 06:25:04	20139	30.0916	6855	2.43378	100	OK	24698	10.8006		BURSTSTART	2016-09-26 06:28:04	20207	30.0082	5276	1.80664	100	OK	24496	10.6973
BURSTSTART	2016-09-26 06:30:04	20138	30.0933	10978	4.00658	100	OK	24695	10.7993		BURSTSTART	2016-09-26 06:33:04	20207	30.0082	6468	2.26135	100	OK	24493	10.696
BURSTSTART	2016-09-26 06:35:04	20137	30.095	4596	1.57204	100	OK	24699	10.801		BURSTSTART	2016-09-26 06:38:04	20206	30.0099	5636	1.94397	100	OK	24493	10.696
BURSTSTART	2016-09-26 06:40:04	20137	30.095	5167	1.78986	100	OK	24696	10.7997		BURSTSTART	2016-09-26 06:43:04	20204	30.0133	6291	2.19383	100	OK	24489	10.6944
BURSTSTART	2016-09-26 06:45:04	20137	30.095	8109	2.91214	100	OK	24699	10.801		BURSTSTART	2016-09-26 06:48:04	20203	30.0149	5284	1.80969	100	OK	24490	10.6948
BURSTSTART	2016-09-26 06:50:04	20137	30.095	4867	1.67542	100	OK	24698	10.8006		BURSTSTART	2016-09-26 06:53:04	20203	30.0149	5867	2.03209	100	OK	24489	10.6944
BURSTSTART	2016-09-26 06:55:04	20137	30.095	4608	1.57662	100	OK	24697	10.8002		BURSTSTART	2016-09-26 06:58:04	20202	30.0166	6501	2.27394	100	OK	24489	10.6944
BURSTSTART	2016-09-26 07:00:04	20137	30.095	5160	1.78719	100	OK	24698	10.8006		BURSTSTART	2016-09-26 07:03:04	20201	30.0183	5416	1.86005	100	OK	24492	10.6956
BURSTSTART	2016-09-26 07:05:04	20140	30.09	5074	1.75438	100	OK	24698	10.8006		BURSTSTART	2016-09-26 07:08:04	20199	30.0216	7510	2.65885	100	OK	24488	10.6939
BURSTSTART	2016-09-26 07:10:04	20137	30.095	7644	2.73476	100	OK	24696	10.7997		BURSTSTART	2016-09-26 07:13:04	20197	30.025	5527	1.90239	100	OK	24489	10.6944
BURSTSTART	2016-09-26 07:15:04	20137	30.095	7983	2.86408	100	OK	24699	10.801		BURSTSTART	2016-09-26 07:18:04	20196	30.0266	5733	1.98097	100	OK	24489	10.6944
BURSTSTART	2016-09-26 07:20:04	20138	30.0933	5431	1.89057	100	OK	24698	10.8006		BURSTSTART	2016-09-26 07:23:04	20195	30.0283	5170	1.76621	100	OK	24494	10.6964
BURSTSTART	2016-09-26 07:25:04	20137	30.095	6519	2.3056	100	OK	24699	10.801		BURSTSTART	2016-09-26 07:28:04	20193	30.0317	5761	1.99165	100	OK	24487	10.6935
BURSTSTART	2016-09-26 07:30:04	20137	30.095	6569	2.32468	100	OK	24698	10.8006		BURSTSTART	2016-09-26 07:33:04	20191	30.035	4878	1.65482	100	OK	24489	10.6944
BURSTSTART	2016-09-26 07:35:04	20133	30.1017	7058	2.51122	100	OK	24698	10.8006		BURSTSTART	2016-09-26 07:38:04	20190	30.0367	5336	1.82953	100	OK	24489	10.6944
BURSTSTART	2016-09-26 07:40:04	20136	30.0967	6125	2.1553	100	OK	24695	10.7993		BURSTSTART	2016-09-26 07:43:04	20186	30.0434	5600	1.93024	100	OK	24489	10.6944
BURSTSTART	2016-09-26 07:45:04	20133	30.1017	5406	1.88103	100	OK	24700	10.8014		BURSTSTART	2016-09-26 07:48:04	20186	30.0434	5473	1.88179	100	OK	24487	10.6935
BURSTSTART	2016-09-26 07:50:04	20133	30.1017	6142	2.16179	100	OK	24699	10.801		BURSTSTART	2016-09-26 07:53:04	20186	30.0434	5456	1.87531	100	OK	24488	10.6939
BURSTSTART	2016-09-26 07:55:04	20129	30.1084	6924	2.4601	100	OK	24696	10.7997		BURSTSTART	2016-09-26 07:58:04	20185	30.0451	5592	1.92719	100	OK	24494	10.6964
BURSTSTART	2016-09-26 08:00:04	20130	30.1068	6619	2.34375	100	OK	24697	10.8002		BURSTSTART	2016-09-26 08:03:04	20183	30.0484	4775	1.61553	100	OK	24489	10.6944
BURSTSTART	2016-09-26 08:05:04	20129	30.1084	8670	3.12615	100	OK	24697	10.8002		BURSTSTART	2016-09-26 08:08:04	20182	30.0501	5152	1.75934	100	OK	24492	10.6956
BURSTSTART	2016-09-26 08:10:04	20127	30.1118	7528	2.69051	100	OK	24698	10.8006		BURSTSTART	2016-09-26 08:13:04	20180	30.0534	5026	1.71127	100	OK	24492	10.6956
BURSTSTART	2016-09-26 08:15:04	20129	30.1084	7419	2.64893	100	OK	24699	10.801		BURSTSTART	2016-09-26 08:18:04	20177	30.0584	5901	2.04506	100	OK	24488	10.6939
BURSTSTART	2016-09-26 08:20:04	20127	30.1118	6859	2.4353	100	OK	24699	10.801		BURSTSTART	2016-09-26 08:23:04	20175	30.0618	4999	1.70097	100	OK	24489	10.6944
BURSTSTART	2016-09-26 08:25:04	20129	30.1084	6113	2.15073	100	OK	24699	10.801		BURSTSTART	2016-09-26 08:28:04	20172	30.0668	4832	1.63727	100	OK	24490	10.6948
BURSTSTART	2016-09-26 08:30:04	20126	30.1135	7746	2.77367	100	OK	24701	10.8018		BURSTSTART	2016-09-26 08:33:04	20167	30.0752	4981	1.69411	100	OK	24488	10.6939
BURSTSTART	2016-09-26 08:35:04	20131	30.1051	6891	2.44751	100	OK	24697	10.8002		BURSTSTART	2016-09-26 08:38:04	20163	30.0819	4988	1.69678	100	OK	24486	10.6931
BURSTSTART	2016-09-26 08:40:04	20145	30.0816	6968	2.47688	100	OK	24698	10.8006		BURSTSTART	2016-09-26 08:43:04	20159	30.0886	4308	1.43738	100	OK	24491	10.6952
BURSTSTART	2016-09-26 08:45:04	20159	30.0581	8986	3.24669	100	OK	24697	10.8002		BURSTSTART	2016-09-26 08:48:04	20153	30.0986	4489	1.50642	100	OK	24488	10.6939
BURSTSTART	2016-09-26 08:50:04	20161	30.0547	10644	3.87917	100	OK	24698	10.8006		BURSTSTART	2016-09-26 08:53:04	20150	30.1037	4825	1.6346	100	OK	24460	10.6822
BURSTSTART	2016-09-26 08:55:04	20178	30.0263	7139	2.54212	100	OK	24696	10.7997		BURSTSTART	2016-09-26 08:58:04	20147	30.1087	4387	1.46751	100	OK	24486	10.6931
BURSTSTART	2016-09-26 09:00:04	20225	29.9476	8298	2.98424	100	OK	24690	10.7972		BURSTSTART	2016-09-26 09:03:04	20142	30.1171	4647	1.5667	100	OK	24483	10.6918
BURSTSTART	2016-09-26 09:05:04	20231	29.9375	6174	2.174	100	OK	24689	10.7968		BURSTSTART	2016-09-26 09:08:04	20137	30.1254	4250	1.41525	100	OK	24482	10.6914
BURSTSTART	2016-09-26 09:10:04	20230	29.9392	5981	2.10037	100	OK	24690	10.7972		BURSTSTART	2016-09-26 09:13:04	20130	30.1372	4509	1.51405	100	OK	24482	10.6914
BURSTSTART	2016-09-26 09:15:04	20232	29.9358	6965	2.47574	100	OK	24682	10.7939		BURSTSTART	2016-09-26 09:18:04	20126	30.1439	4249	1.41487	100	OK	24484	10.6923
BURSTSTART	2016-09-26 09:20:04	20232	29.9358	6295	2.22016	100	OK	24689	10.7968		BURSTSTART	2016-09-26 09:23:04	20121	30.1523	4186	1.39084	100	OK	24484	10.6923
BURSTSTART	2016-09-26 09:25:04	20230	29.9392	6879	2.44293	100	OK	24689	10.7968		BURSTSTART	2016-09-26 09:28:04	20118	30.1573	5115	1.74523	100	OK	24482	10.6914
BURSTSTART	2016-09-26 09:30:04	20224	29.9492	6172	2.17324	100	OK	24687	10.796		BURSTSTART	2016-09-26 09:33:04	20115	30.1623	4131	1.36986	100	OK	24481	10.691
BURSTSTART	2016-09-26 09:35:04	20227	29.9442	7762	2.77977	100	OK	24688	10.7964		BURSTSTART	2016-09-26 09:38:04	20110	30.1707	4050	1.33896	100	OK	24481	10.691
BURSTSTART	2016-09-26 09:40:04	20227	29.9442	7979	2.86255	100	OK	24689	10.7968		BURSTSTART	2016-09-26 09:43:04	20108	30.1741	4380	1.46484	100	OK	24486	10.6931
BURSTSTART	2016-09-26 09:45:04	20230	29.9392	5557	1.93863	100	OK	24690	10.7972		BURSTSTART	2016-09-26 09:48:04	20105	30.1791	5601	1.93062	100	OK	24481	10.691
BURSTSTART	2016-09-26 09:50:04	20228	29.9425	5944	2.08626	100	OK	24688	10.7964		BURSTSTART	2016-09-26 09:53:04	20102	30.1842	3976	1.31073	100	OK	24484	10.6923
BURSTSTART	2016-09-26 09:55:04	20173	30.0346	6102	2.14653	100	OK	24691	10.7976		BURSTSTART	2016-09-26 09:58:04	20101	30.1858	6180	2.15149	100	OK	24486	10.6931
BURSTSTART	2016-09-26 10:00:04	20185	30.0145	7020	2.49672	100	OK	24691	10.7976		BURSTSTART	2016-09-26 10:03:04	20100	30.1875	4957	1.68495	100	OK	24481	10.691
BURSTSTART	2016-09-26 10:05:04	20201	29.9877	6955	2.47193	100	OK	24690	10.7972		BURSTSTART	2016-09-26 10:08:04	20098	30.1909	4482	1.50375	100	OK	24482	10.6914
BURSTSTART	2016-09-26 10:10:04	20205	29.981	7031	2.50092	100	OK	24688	10.7964		BURSTSTART	2016-09-26 10:13:04	20096	30.1942	4478	1.50223	100	OK	24481	10.691
BURSTSTART	2016-09-26 10:15:04	20171	30.038	7872	2.82173	100	OK	24692	10.7981		BURSTSTART	2016-09-26 10:18:04	20097	30.1925	6030	2.09427	100	OK	24481	10.691
BURSTSTART	2016-09-26 10:20:04	20197	29.9944	6087	2.14081	100	OK	24693	10.7985		BURSTSTART	2016-09-26 10:23:04	20097	30.1925	7651	2.71263	100	OK	24483	10.6918
BURSTSTART	2016-09-26 10:25:04	20175	30.0313	6395	2.2583	100	OK	24690	10.7972		BURSTSTART	2016-09-26 10:28:04	20095	30.1959	7732	2.74353	100	OK	24481	10.691
BURSTSTART	2016-09-26 10:30:04	20202	29.9861	6970	2.47765	100	OK	24690	10.7972		BURSTSTART	2016-09-26 10:33:04	20097	30.1925	7216	2.54669	100	OK	24482	10.6914
BURSTSTART	2016-09-26 10:35:04	20207	29.9777	6790	2.40898	100	OK	24689	10.7968		BURSTSTART	2016-09-26 10:38:04	20096	30.1942	4740	1.60217	100	OK	24481	10.691
BURSTSTART	2016-09-26 10:40:04	20217	29.9609	6742	2.39067	100	OK	24688	10.7964		BURSTSTART	2016-09-26 10:43:04	20101	30.1858	4920	1.67084	100	OK	24489	10.6944
BURSTSTART	2016-09-26 10:45:04	20218	29.9593	11129	4.06418	100	OK	24688	10.7964		BURSTSTART	2016-09-26 10:48:04	20096	30.1942	4934	1.67618	100	OK	24483	10.6918
BURSTSTART	2016-09-26 10:50:04	20215	29.9643	8259	2.96936	100	OK	24690	10.7972		BURSTSTART	2016-09-26 10:53:04	20099	30.1892	5995	2.08092	100	OK	24481	10.691
BURSTSTART	2016-09-26 10:55:04	20213	29.9676	9449	3.42331	100	OK	24690	10.7972		BURSTSTART	2016-09-26 10:58:04	20098	30.1909	7657	2.71492	100	OK	24486	10.6931
BURSTSTART	2016-09-26 11:00:04	20213	29.9676	7759	2.77863	100	OK	24689	10.7968		BURSTSTART	2016-09-26 11:03:04	20098	30.1909	5357	1.83754	100	OK	24480	10.6906
BURSTSTART	2016-09-26 11:05:04	20207	29.9777	9815	3.56293	100	OK	24689	10.7968		BURSTSTART	2016-09-26 11:08:04	20096	30.1942	6003	2.08397	100	OK	24482	10.6914
BURSTSTART	2016-09-26 11:10:04	20204	29.9827	9567	3.46833	100	OK	24690	10.7972		BURSTSTART	2016-09-26 11:13:04	20095	30.1959	5151	1.75896	100	OK	24481	10.691
BURSTSTART	2016-09-26 11:15:04	20204	29.9827	9346	3.38402	100	OK	24691	10.7976		BURSTSTART	2016-09-26 11:18:04	20093	30.1993	5110	1.74332	100	OK	24481	10.691
BURSTSTART	2016-09-26 11:20:04	20199	29.9911	8394	3.02086	100	OK	24690	10.7972		BURSTSTART	2016-09-26 11:23:04	20087	30.2093	6030	2.09427	100	OK	24483	10.6918
BURSTSTART	2016-09-26 11:25:04	20196	29.9961	9263	3.35236	100	OK	24691	10.7976		BURSTSTART	2016-09-26 11:28:04	20091	30.2026	4809	1.6285	100	OK	24482	10.6914
BURSTSTART	2016-09-26 11:30:04	20133	30.1017	9422	3.41301	100	OK	24696	10.7997		BURSTSTART	2016-09-26 11:33:04	20089	30.206	5179	1.76964	100	OK	24480	10.6906
BURSTSTART	2016-09-26 11:35:04	20106	30.147	9634	3.49388	100	OK	24698	10.8006		BURSTSTART	2016-09-26 11:38:04	20085	30.2127	5169	1.76582	100	OK	24480	10.6906
BURSTSTART	2016-09-26 11:40:04	20102	30.1538	9422	3.41301	100	OK	24700	10.8014		BURSTSTART	2016-09-26 11:43:04	20078	30.2244	4731	1.59874	100	OK	24482	10.6914
BURSTSTART	2016-09-26 11:45:04	20109	30.142	10102	3.67241	100	OK	24700	10.8014		BURSTSTART	2016-09-26 11:48:04	20075	30.2295	5021	1.70937	100	OK	24481	10.691
BURSTSTART	2016-09-26 11:50:04	20115	30.1319	10386	3.78075	100	OK	24698	10.8006		BURSTSTART	2016-09-26 11:53:04	20078	30.2244	5602	1.931	100	OK	24483	10.6918
BURSTSTART	2016-09-26 11:55:04	20102	30.1538	11078	4.04473	100	OK	24701	10.8018		BURSTSTART	2016-09-26 11:58:04	20079	30.2228	5740	1.98364	100	OK	24480	10.6906
BURSTSTART	2016-09-26 12:00:04	20121	30.1219	9428	3.4153	100	OK	24701	10.8018		BURSTSTART	2016-09-26 12:03:04	20088	30.2077	5048	1.71967	100	OK	24481	10.691
BURSTSTART	2016-09-26 12:05:04	20159	30.0581	10150	3.69072	100	OK	24699	10.801		BURSTSTART	2016-09-26 12:08:04	20090	30.2043	5192	1.7746	100	OK	24482	10.6914
BURSTSTART	2016-09-26 12:10:04	20161	30.0547	9195	3.32642	100	OK	24697	10.8002		BURSTSTART	2016-09-26 12:13:04	20086	30.211	5367	1.84136	100	OK	24481	10.691
BURSTSTART	2016-09-26 12:15:04	20178	30.0263	9912	3.59993	100	OK	24698	10.8006		BURSTSTART	2016-09-26 12:18:04	20079	30.2228	5663	1.95427	100	OK	24481	10.691
BURSTSTART	2016-09-26 12:20:04	20175	30.0313	10680	3.8929	100	OK	24694	10.7989		BURSTSTART	2016-09-26 12:23:04	20078	30.2244	5784	2.00043	100	OK	24481	10.691
BURSTSTART	2016-09-26 12:25:04	20173	30.0346	9761	3.54233	100	OK	24694	10.7989		BURSTSTART	2016-09-26 12:28:04	20082	30.2177	4748	1.60523	100	OK	24480	10.6906
BURSTSTART	2016-09-26 12:30:04	20170	30.0397	10398	3.78533	100	OK	24694	10.7989		BURSTSTART	2016-09-26 12:33:04	20080	30.2211	5156	1.76086	100	OK	24481	10.691
BURSTSTART	2016-09-26 12:35:04	20167	30.0447	9541	3.45841	100	OK	24697	10.8002		BURSTSTART	2016-09-26 12:38:04	20083	30.216	4500	1.51062	100	OK	24480	10.6906
BURSTSTART	2016-09-26 12:40:04	20163	30.0514	9865	3.582	100	OK	24700	10.8014		BURSTSTART	2016-09-26 12:43:04	20087	30.2093	5363	1.83983	100	OK	24480	10.6906
BURSTSTART	2016-09-26 12:45:04	20165	30.048	10126	3.68157	100	OK	24698	10.8006		BURSTSTART	2016-09-26 12:48:04	20087	30.2093	4772	1.61438	100	OK	24482	10.6914
BURSTSTART	2016-09-26 12:50:04	20160	30.0564	12267	4.49829	100	OK	24698	10.8006		BURSTSTART	2016-09-26 12:53:04	20084	30.2144	4722	1.59531	100	OK	24482	10.6914
BURSTSTART	2016-09-26 12:55:04	20161	30.0547	12149	4.45328	100	OK	24697	10.8002		BURSTSTART	2016-09-26 12:58:04	20082	30.2177	5283	1.80931	100	OK	24481	10.691
BURSTSTART	2016-09-26 13:00:04	20158	30.0598	12278	4.50249	100	OK	24698	10.8006		BURSTSTART	2016-09-26 13:03:04	20081	30.2194	5015	1.70708	100	OK	24480	10.6906
BURSTSTART	2016-09-26 13:05:04	20142	30.0866	11794	4.31786	100	OK	24696	10.7997		BURSTSTART	2016-09-26 13:08:04	20081	30.2194	5013	1.70632	100	OK	24481	10.691
BURSTSTART	2016-09-26 13:10:04	20126	30.1135	12394	4.54674	100	OK	24698	10.8006		BURSTSTART	2016-09-26 13:13:04	20078	30.2244	5275	1.80626	100	OK	24480	10.6906
BURSTSTART	2016-09-26 13:15:04	20122	30.1202	12111	4.43879	100	OK	24699	10.801		BURSTSTART	2016-09-26 13:18:04	20079	30.2228	4944	1.67999	100	OK	24485	10.6927
BURSTSTART	2016-09-26 13:20:04	20128	30.1101	12262	4.49639	100	OK	24699	10.801		BURSTSTART	2016-09-26 13:23:04	20085	30.2127	4880	1.65558	100	OK	24454	10.6797
BURSTSTART	2016-09-26 13:25:04	20121	30.1219	11914	4.36364	100	OK	24698	10.8006		BURSTSTART	2016-09-26 13:28:04	20087	30.2093	5238	1.79215	100	OK	24483	10.6918
BURSTSTART	2016-09-26 13:30:04	20126	30.1135	12142	4.45061	100	OK	24698	10.8006		BURSTSTART	2016-09-26 13:33:04	20091	30.2026	4401	1.47286	100	OK	24482	10.6914
BURSTSTART	2016-09-26 13:35:04	20129	30.1084	12619	4.63257	100	OK	24700	10.8014		BURSTSTART	2016-09-26 13:38:04	20088	30.2077	5007	1.70403	100	OK	24481	10.691
BURSTSTART	2016-09-26 13:40:04	20132	30.1034	13365	4.91715	100	OK	24700	10.8014		BURSTSTART	2016-09-26 13:43:04	20094	30.1976	4649	1.56746	100	OK	24482	10.6914
BURSTSTART	2016-09-26 13:45:04	20140	30.09	12359	4.53339	100	OK	24689	10.7968		BURSTSTART	2016-09-26 13:48:04	20088	30.2077	4686	1.58157	100	OK	24481	10.691
BURSTSTART	2016-09-26 13:50:04	20139	30.0916	12880	4.73214	100	OK	24700	10.8014		BURSTSTART	2016-09-26 13:53:04	20089	30.206	5167	1.76506	100	OK	24481	10.691
BURSTSTART	2016-09-26 13:55:04	20143	30.0849	13080	4.80843	100	OK	24696	10.7997		BURSTSTART	2016-09-26 13:58:04	20086	30.211	5928	2.05536	100	OK	24480	10.6906
BURSTSTART	2016-09-26 14:00:04	20139	30.0916	11664	4.26827	100	OK	24696	10.7997		BURSTSTART	2016-09-26 14:03:04	20092	30.2009	4806	1.62735	100	OK	24480	10.6906
BURSTSTART	2016-09-26 14:05:04	20135	30.0984	11623	4.25263	100	OK	24698	10.8006		BURSTSTART	2016-09-26 14:08:04	20096	30.1942	4981	1.69411	100	OK	24482	10.6914
BURSTSTART	2016-09-26 14:10:04	20135	30.0984	12116	4.44069	100	OK	24698	10.8006		BURSTSTART	2016-09-26 14:13:04	20099	30.1892	4977	1.69258	100	OK	24482	10.6914
BURSTSTART	2016-09-26 14:15:04	20135	30.0984	13093	4.81339	100	OK	24699	10.801		BURSTSTART	2016-09-26 14:18:04	20099	30.1892	5129	1.75057	100	OK	24481	10.691
BURSTSTART	2016-09-26 14:20:04	20134	30.1	13065	4.80271	100	OK	24699	10.801		BURSTSTART	2016-09-26 14:23:04	20100	30.1875	4877	1.65444	100	OK	24488	10.6939
BURSTSTART	2016-09-26 14:25:04	20133	30.1017	12945	4.75693	100	OK	24699	10.801		BURSTSTART	2016-09-26 14:28:04	20096	30.1942	5475	1.88255	100	OK	24486	10.6931
BURSTSTART	2016-09-26 14:30:04	20131	30.1051	11766	4.30718	100	OK	24697	10.8002		BURSTSTART	2016-09-26 14:33:04	20094	30.1976	5395	1.85204	100	OK	24481	10.691
BURSTSTART	2016-09-26 14:35:04	20129	30.1084	13339	4.90723	100	OK	24698	10.8006		BURSTSTART	2016-09-26 14:38:04	20094	30.1976	5161	1.76277	100	OK	24481	10.691
BURSTSTART	2016-09-26 14:40:04	20127	30.1118	13299	4.89197	100	OK	24696	10.7997		BURSTSTART	2016-09-26 14:43:04	20097	30.1925	5329	1.82686	100	OK	24480	10.6906
BURSTSTART	2016-09-26 14:45:04	20128	30.1101	13174	4.84429	100	OK	24699	10.801		BURSTSTART	2016-09-26 14:48:04	20105	30.1791	5871	2.03362	100	OK	24482	10.6914
BURSTSTART	2016-09-26 14:50:04	20127	30.1118	13249	4.8729	100	OK	24697	10.8002		BURSTSTART	2016-09-26 14:53:04	20100	30.1875	5081	1.73226	100	OK	24481	10.691
BURSTSTART	2016-09-26 14:55:04	20129	30.1084	13364	4.91677	100	OK	24698	10.8006		BURSTSTART	2016-09-26 14:58:04	20098	30.1909	4893	1.66054	100	OK	24480	10.6906
BURSTSTART	2016-09-26 15:00:04	20126	30.1135	13276	4.8832	100	OK	24699	10.801		BURSTSTART	2016-09-26 15:03:04	20099	30.1892	5418	1.86081	100	OK	24483	10.6918
BURSTSTART	2016-09-26 15:05:04	20123	30.1185	13817	5.08957	100	OK	24700	10.8014		BURSTSTART	2016-09-26 15:08:04	20097	30.1925	5436	1.86768	100	OK	24485	10.6927
BURSTSTART	2016-09-26 15:10:04	20126	30.1135	13422	4.93889	100	OK	24699	10.801		BURSTSTART	2016-09-26 15:13:04	20092	30.2009	4410	1.47629	100	OK	24481	10.691
BURSTSTART	2016-09-26 15:15:04	20122	30.1202	13335	4.9057	100	OK	24699	10.801		BURSTSTART	2016-09-26 15:18:04	20088	30.2077	4819	1.63231	100	OK	24478	10.6897
BURSTSTART	2016-09-26 15:20:04	20121	30.1219	13320	4.89998	100	OK	24697	10.8002		BURSTSTART	2016-09-26 15:23:04	20092	30.2009	5091	1.73607	100	OK	24481	10.691
BURSTSTART	2016-09-26 15:25:04	20120	30.1235	13000	4.77791	100	OK	24698	10.8006		BURSTSTART	2016-09-26 15:28:04	20092	30.2009	5174	1.76773	100	OK	24481	10.691
BURSTSTART	2016-09-26 15:30:04	20119	30.1252	14114	5.20287	100	OK	24701	10.8018		BURSTSTART	2016-09-26 15:33:04	20093	30.1993	4746	1.60446	100	OK	24481	10.691
BURSTSTART	2016-09-26 15:35:04	20114	30.1336	14146	5.21508	100	OK	24701	10.8018		BURSTSTART	2016-09-26 15:38:04	20088	30.2077	4931	1.67504	100	OK	24481	10.691
BURSTSTART	2016-09-26 15:40:04	20113	30.1353	14277	5.26505	100	OK	24699	10.801		BURSTSTART	2016-09-26 15:43:04	20078	30.2244	5455	1.87492	100	OK	24479	10.6902
BURSTSTART	2016-09-26 15:45:04	20111	30.1387	14273	5.26352	100	OK	24700	10.8014		BURSTSTART	2016-09-26 15:48:04	20075	30.2295	5282	1.80893	100	OK	24479	10.6902
BURSTSTART	2016-09-26 15:50:04	20108	30.1437	14333	5.28641	100	OK	24700	10.8014		BURSTSTART	2016-09-26 15:53:04	20072	30.2345	4981	1.69411	100	OK	24480	10.6906
BURSTSTART	2016-09-26 15:55:04	20106	30.147	14304	5.27535	100	OK	24699	10.801		BURSTSTART	2016-09-26 15:58:04	20070	30.2379	4870	1.65176	100	OK	24480	10.6906
BURSTSTART	2016-09-26 16:00:04	20107	30.1454	13884	5.11513	100	OK	24700	10.8014		BURSTSTART	2016-09-26 16:03:04	20073	30.2328	4975	1.69182	100	OK	24480	10.6906
BURSTSTART	2016-09-26 16:05:04	20104	30.1504	14530	5.36156	100	OK	24701	10.8018		BURSTSTART	2016-09-26 16:08:04	20080	30.2211	5437	1.86806	100	OK	24485	10.6927
BURSTSTART	2016-09-26 16:10:04	20103	30.1521	14707	5.42908	100	OK	24701	10.8018		BURSTSTART	2016-09-26 16:13:04	20085	30.2127	6129	2.13204	100	OK	24481	10.691
BURSTSTART	2016-09-26 16:15:04	20102	30.1538	14843	5.48096	100	OK	24702	10.8023		BURSTSTART	2016-09-26 16:18:04	20085	30.2127	4936	1.67694	100	OK	24479	10.6902
BURSTSTART	2016-09-26 16:20:04	20103	30.1521	14543	5.36652	100	OK	24701	10.8018		BURSTSTART	2016-09-26 16:23:04	20085	30.2127	4851	1.64452	100	OK	24485	10.6927
BURSTSTART	2016-09-26 16:25:04	20104	30.1504	13882	5.11437	100	OK	24699	10.801		BURSTSTART	2016-09-26 16:28:04	20088	30.2077	4544	1.52741	100	OK	24480	10.6906
BURSTSTART	2016-09-26 16:30:04	20104	30.1504	14837	5.47867	100	OK	24702	10.8023		BURSTSTART	2016-09-26 16:33:04	20089	30.206	5419	1.86119	100	OK	24480	10.6906
BURSTSTART	2016-09-26 16:35:04	20105	30.1487	15319	5.66254	100	OK	24701	10.8018		BURSTSTART	2016-09-26 16:38:04	20086	30.211	5172	1.76697	100	OK	24480	10.6906
BURSTSTART	2016-09-26 16:40:04	20106	30.147	15369	5.68161	100	OK	24700	10.8014		BURSTSTART	2016-09-26 16:43:04	20084	30.2144	5824	2.01569	100	OK	24480	10.6906
BURSTSTART	2016-09-26 16:45:04	20108	30.1437	14975	5.53132	100	OK	24700	10.8014		BURSTSTART	2016-09-26 16:48:04	20084	30.2144	5476	1.88294	100	OK	24480	10.6906
BURSTSTART	2016-09-26 16:50:04	20107	30.1454	13280	4.88472	100	OK	24701	10.8018		BURSTSTART	2016-09-26 16:53:04	20085	30.2127	6262	2.18277	100	OK	24485	10.6927
BURSTSTART	2016-09-26 16:55:04	20107	30.1454	15265	5.64194	100	OK	24701	10.8018		BURSTSTART	2016-09-26 16:58:04	20086	30.211	5167	1.76506	100	OK	24482	10.6914
BURSTSTART	2016-09-26 17:00:04	20108	30.1437	14355	5.2948	100	OK	24701	10.8018		BURSTSTART	2016-09-26 17:03:04	20086	30.211	5188	1.77307	100	OK	24480	10.6906
BURSTSTART	2016-09-26 17:05:04	20107	30.1454	14752	5.44625	100	OK	24700	10.8014		BURSTSTART	2016-09-26 17:08:04	20086	30.211	5931	2.05651	100	OK	24481	10.691
BURSTSTART	2016-09-26 17:10:04	20107	30.1454	14938	5.5172	100	OK	24701	10.8018		BURSTSTART	2016-09-26 17:13:04	20089	30.206	5470	1.88065	100	OK	24481	10.691
BURSTSTART	2016-09-26 17:15:04	20109	30.142	15793	5.84336	100	OK	24701	10.8018		BURSTSTART	2016-09-26 17:18:04	20090	30.2043	5183	1.77117	100	OK	24479	10.6902
BURSTSTART	2016-09-26 17:20:04	20108	30.1437	14635	5.40161	100	OK	24699	10.801		BURSTSTART	2016-09-26 17:23:04	20095	30.1959	5611	1.93443	100	OK	24481	10.691
BURSTSTART	2016-09-26 17:25:04	20107	30.1454	15317	5.66178	100	OK	24701	10.8018		BURSTSTART	2016-09-26 17:28:04	20098	30.1909	5390	1.85013	100	OK	24480	10.6906
BURSTSTART	2016-09-26 17:30:04	20107	30.1454	15741	5.82352	100	OK	24700	10.8014		BURSTSTART	2016-09-26 17:33:04	20102	30.1842	6201	2.1595	100	OK	24486	10.6931
BURSTSTART	2016-09-26 17:35:04	20106	30.147	15320	5.66292	100	OK	24699	10.801		BURSTSTART	2016-09-26 17:38:04	20107	30.1758	5325	1.82533	100	OK	24487	10.6935
BURSTSTART	2016-09-26 17:40:04	20108	30.1437	15142	5.59502	100	OK	24702	10.8023		BURSTSTART	2016-09-26 17:43:04	20110	30.1707	5111	1.7437	100	OK	24480	10.6906
BURSTSTART	2016-09-26 17:45:04	20108	30.1437	16261	6.02189	100	OK	24701	10.8018		BURSTSTART	2016-09-26 17:48:04	20113	30.1657	4921	1.67122	100	OK	24482	10.6914
BURSTSTART	2016-09-26 17:50:04	20111	30.1387	15853	5.86625	100	OK	24700	10.8014		BURSTSTART	2016-09-26 17:53:04	20120	30.154	5037	1.71547	100	OK	24483	10.6918
BURSTSTART	2016-09-26 17:55:04	20109	30.142	16485	6.10733	100	OK	24700	10.8014		BURSTSTART	2016-09-26 17:58:04	20123	30.1489	5158	1.76163	100	OK	24483	10.6918
BURSTSTART	2016-09-26 18:00:04	20111	30.1387	16052	5.94216	100	OK	24700	10.8014		BURSTSTART	2016-09-26 18:03:04	20125	30.1456	4999	1.70097	100	OK	24482	10.6914
BURSTSTART	2016-09-26 18:05:04	20112	30.137	15611	5.77393	100	OK	24700	10.8014		BURSTSTART	2016-09-26 18:08:04	20127	30.1422	5354	1.8364	100	OK	24484	10.6923
BURSTSTART	2016-09-26 18:10:04	20111	30.1387	16333	6.04935	100	OK	24699	10.801		BURSTSTART	2016-09-26 18:13:04	20128	30.1405	4991	1.69792	100	OK	24484	10.6923
BURSTSTART	2016-09-26 18:15:04	20113	30.1353	14248	5.25399	100	OK	24700	10.8014		BURSTSTART	2016-09-26 18:18:04	20130	30.1372	4953	1.68343	100	OK	24483	10.6918
BURSTSTART	2016-09-26 18:20:04	20111	30.1387	17121	6.34995	100	OK	24701	10.8018		BURSTSTART	2016-09-26 18:23:04	20132	30.1338	4855	1.64604	100	OK	24483	10.6918
BURSTSTART	2016-09-26 18:25:04	20110	30.1403	16374	6.06499	100	OK	24701	10.8018		BURSTSTART	2016-09-26 18:28:04	20136	30.1271	5426	1.86386	100	OK	24485	10.6927
BURSTSTART	2016-09-26 18:30:04	20114	30.1336	16245	6.01578	100	OK	24701	10.8018		BURSTSTART	2016-09-26 18:33:04	20137	30.1254	5721	1.9764	100	OK	24485	10.6927
BURSTSTART	2016-09-26 18:35:04	20111	30.1387	15466	5.71862	100	OK	24702	10.8023		BURSTSTART	2016-09-26 18:38:04	20140	30.1204	5315	1.82152	100	OK	24490	10.6948
BURSTSTART	2016-09-26 18:40:04	20112	30.137	16376	6.06575	100	OK	24701	10.8018		BURSTSTART	2016-09-26 18:43:04	20142	30.1171	5111	1.7437	100	OK	24484	10.6923
BURSTSTART	2016-09-26 18:45:04	20113	30.1353	17956	6.66848	100	OK	24700	10.8014		BURSTSTART	2016-09-26 18:48:04	20142	30.1171	4367	1.45989	100	OK	24482	10.6914
BURSTSTART	2016-09-26 18:50:04	20112	30.137	18571	6.90308	100	OK	24700	10.8014		BURSTSTART	2016-09-26 18:53:04	20142	30.1171	4533	1.52321	100	OK	24484	10.6923
BURSTSTART	2016-09-26 18:55:04	20113	30.1353	22120	8.25692	100	OK	24700	10.8014		BURSTSTART	2016-09-26 18:58:04	20141	30.1187	4454	1.49307	100	OK	24482	10.6914
BURSTSTART	2016-09-26 19:00:04	20110	30.1403	19948	7.42837	100	OK	24700	10.8014		BURSTSTART	2016-09-26 19:03:04	20143	30.1154	4687	1.58196	100	OK	24490	10.6948
BURSTSTART	2016-09-26 19:05:04	20108	30.1437	18554	6.8966	100	OK	24699	10.801		BURSTSTART	2016-09-26 19:08:04	20144	30.1137	4487	1.50566	100	OK	24481	10.691
BURSTSTART	2016-09-26 19:10:04	20103	30.1521	19123	7.11365	100	OK	24701	10.8018		BURSTSTART	2016-09-26 19:13:04	20146	30.1104	5798	2.00577	100	OK	24487	10.6935
BURSTSTART	2016-09-26 19:15:04	20102	30.1538	19337	7.19529	100	OK	24699	10.801		BURSTSTART	2016-09-26 19:18:04	20147	30.1087	7211	2.54479	100	OK	24483	10.6918
BURSTSTART	2016-09-26 19:20:04	20102	30.1538	18977	7.05796	100	OK	24699	10.801		BURSTSTART	2016-09-26 19:23:04	20148	30.107	5077	1.73073	100	OK	24484	10.6923
BURSTSTART	2016-09-26 19:25:04	20101	30.1554	20012	7.45278	100	OK	24703	10.8027		BURSTSTART	2016-09-26 19:28:04	20153	30.0986	4848	1.64337	100	OK	24483	10.6918
BURSTSTART	2016-09-26 19:30:04	20100	30.1571	18194	6.75927	100	OK	24700	10.8014		BURSTSTART	2016-09-26 19:33:04	20156	30.0936	5739	1.98326	100	OK	24484	10.6923
BURSTSTART	2016-09-26 19:35:04	20099	30.1588	21724	8.10586	100	OK	24700	10.8014		BURSTSTART	2016-09-26 19:38:04	20158	30.0903	4242	1.4122	100	OK	24483	10.6918
BURSTSTART	2016-09-26 19:40:04	20098	30.1605	19481	7.25022	100	OK	24702	10.8023		BURSTSTART	2016-09-26 19:43:04	20159	30.0886	4725	1.59645	100	OK	24486	10.6931
BURSTSTART	2016-09-26 19:45:04	20100	30.1571	20518	7.6458	100	OK	24700	10.8014		BURSTSTART	2016-09-26 19:48:04	20160	30.0869	4328	1.44501	100	OK	24485	10.6927
BURSTSTART	2016-09-26 19:50:04	20099	30.1588	18694	6.95	100	OK	24700	10.8014		BURSTSTART	2016-09-26 19:53:04	20165	30.0785	5161	1.76277	100	OK	24486	10.6931
BURSTSTART	2016-09-26 19:55:04	20101	30.1554	18569	6.90232	100	OK	24701	10.8018		BURSTSTART	2016-09-26 19:58:04	20167	30.0752	4457	1.49422	100	OK	24486	10.6931
BURSTSTART	2016-09-26 20:00:04	20102	30.1538	19668	7.32155	100	OK	24701	10.8018		BURSTSTART	2016-09-26 20:03:04	20169	30.0718	4858	1.64719	100	OK	24485	10.6927
BURSTSTART	2016-09-26 20:05:04	20102	30.1538	19889	7.40586	100	OK	24701	10.8018		BURSTSTART	2016-09-26 20:08:04	20172	30.0668	4967	1.68877	100	OK	24485	10.6927
BURSTSTART	2016-09-26 20:10:04	20104	30.1504	18262	6.78521	100	OK	24701	10.8018		BURSTSTART	2016-09-26 20:13:04	20172	30.0668	4306	1.43662	100	OK	24484	10.6923
BURSTSTART	2016-09-26 20:15:04	20103	30.1521	17571	6.52161	100	OK	24701	10.8018		BURSTSTART	2016-09-26 20:18:04	20176	30.0601	5214	1.78299	100	OK	24486	10.6931
BURSTSTART	2016-09-26 20:20:04	20105	30.1487	15947	5.9021	100	OK	24700	10.8014		BURSTSTART	2016-09-26 20:23:04	20175	30.0618	4188	1.3916	100	OK	24486	10.6931
BURSTSTART	2016-09-26 20:25:04	20106	30.147	19064	7.09115	100	OK	24699	10.801		BURSTSTART	2016-09-26 20:28:04	20179	30.0551	4228	1.40686	100	OK	24485	10.6927
BURSTSTART	2016-09-26 20:30:04	20103	30.1521	23643	8.8379	100	OK	24703	10.8027		BURSTSTART	2016-09-26 20:33:04	20181	30.0517	4344	1.45111	100	OK	24486	10.6931
BURSTSTART	2016-09-26 20:35:04	20107	30.1454	24089	9.00803	100	OK	24699	10.801		BURSTSTART	2016-09-26 20:38:04	20183	30.0484	4707	1.58959	100	OK	24485	10.6927
BURSTSTART	2016-09-26 20:40:04	20107	30.1454	23573	8.81119	100	OK	24701	10.8018		BURSTSTART	2016-09-26 20:43:04	20185	30.0451	4839	1.63994	100	OK	24486	10.6931
BURSTSTART	2016-09-26 20:45:04	20109	30.142	22403	8.36487	100	OK	24700	10.8014		BURSTSTART	2016-09-26 20:48:04	20191	30.035	4584	1.54266	100	OK	24486	10.6931
BURSTSTART	2016-09-26 20:50:04	20112	30.137	20450	7.61986	100	OK	24700	10.8014		BURSTSTART	2016-09-26 20:53:04	20190	30.0367	4362	1.45798	100	OK	24485	10.6927
BURSTSTART	2016-09-26 20:55:04	20112	30.137	31438	11.8115	100	OK	24701	10.8018		BURSTSTART	2016-09-26 20:58:04	20192	30.0333	4223	1.40495	100	OK	24487	10.6935
BURSTSTART	2016-09-26 21:00:04	20115	30.1319	27496	10.3077	100	OK	24700	10.8014		BURSTSTART	2016-09-26 21:03:04	20193	30.0317	5139	1.75438	100	OK	24490	10.6948
BURSTSTART	2016-09-26 21:05:04	20116	30.1303	27589	10.3432	100	OK	24699	10.801		BURSTSTART	2016-09-26 21:08:04	20196	30.0266	4767	1.61247	100	OK	24488	10.6939
BURSTSTART	2016-09-26 21:10:04	20116	30.1303	28620	10.7365	100	OK	24699	10.801		BURSTSTART	2016-09-26 21:13:04	20202	30.0166	4155	1.37901	100	OK	24485	10.6927
BURSTSTART	2016-09-26 21:15:04	20112	30.137	14786	5.45922	100	OK	24700	10.8014		BURSTSTART	2016-09-26 21:18:04	20199	30.0216	4030	1.33133	100	OK	24489	10.6944
BURSTSTART	2016-09-26 21:20:04	20115	30.1319	13542	4.98467	100	OK	24699	10.801		BURSTSTART	2016-09-26 21:23:04	20205	30.0116	5034	1.71433	100	OK	24487	10.6935
BURSTSTART	2016-09-26 21:25:04	20115	30.1319	15253	5.63736	100	OK	24700	10.8014		BURSTSTART	2016-09-26 21:28:04	20203	30.0149	4184	1.39008	100	OK	24486	10.6931
BURSTSTART	2016-09-26 21:30:04	20114	30.1336	15201	5.61753	100	OK	24699	10.801		BURSTSTART	2016-09-26 21:33:04	20204	30.0133	4417	1.47896	100	OK	24489	10.6944
BURSTSTART	2016-09-26 21:35:04	20117	30.1286	14496	5.34859	100	OK	24699	10.801		BURSTSTART	2016-09-26 21:38:04	20204	30.0133	4129	1.3691	100	OK	24491	10.6952
BURSTSTART	2016-09-26 21:40:04	20119	30.1252	15133	5.59159	100	OK	24700	10.8014		BURSTSTART	2016-09-26 21:43:04	20210	30.0032	4139	1.37291	100	OK	24495	10.6969
BURSTSTART	2016-09-26 21:45:04	20118	30.1269	13569	4.99497	100	OK	24699	10.801		BURSTSTART	2016-09-26 21:48:04	20210	30.0032	4875	1.65367	100	OK	24487	10.6935
BURSTSTART	2016-09-26 21:50:04	20123	30.1185	18472	6.86531	100	OK	24701	10.8018		BURSTSTART	2016-09-26 21:53:04	20210	30.0032	3790	1.23978	100	OK	24486	10.6931
BURSTSTART	2016-09-26 21:55:04	20120	30.1235	14646	5.40581	100	OK	24702	10.8023		BURSTSTART	2016-09-26 21:58:04	20211	30.0016	5063	1.72539	100	OK	24489	10.6944
BURSTSTART	2016-09-26 22:00:04	20128	30.1101	15927	5.89447	100	OK	24698	10.8006		BURSTSTART	2016-09-26 22:03:04	20211	30.0016	4186	1.39084	100	OK	24489	10.6944
BURSTSTART	2016-09-26 22:05:04	20127	30.1118	16616	6.15731	100	OK	24699	10.801		BURSTSTART	2016-09-26 22:08:04	20212	29.9999	4220	1.40381	100	OK	24491	10.6952
BURSTSTART	2016-09-26 22:10:04	20127	30.1118	19031	7.07856	100	OK	24699	10.801		BURSTSTART	2016-09-26 22:13:04	20213	29.9982	3882	1.27487	100	OK	24490	10.6948
BURSTSTART	2016-09-26 22:15:04	20131	30.1051	20151	7.5058	100	OK	24698	10.8006		BURSTSTART	2016-09-26 22:18:04	20214	29.9965	4008	1.32294	100	OK	24488	10.6939
BURSTSTART	2016-09-26 22:20:04	20129	30.1084	17501	6.49491	100	OK	24695	10.7993		BURSTSTART	2016-09-26 22:23:04	20213	29.9982	4437	1.48659	100	OK	24496	10.6973
BURSTSTART	2016-09-26 22:25:04	20130	30.1068	18565	6.90079	100	OK	24696	10.7997		BURSTSTART	2016-09-26 22:28:04	20219	29.9882	4181	1.38893	100	OK	24489	10.6944
BURSTSTART	2016-09-26 22:30:04	20130	30.1068	14211	5.23987	100	OK	24699	10.801		BURSTSTART	2016-09-26 22:33:04	20222	29.9832	4059	1.34239	100	OK	24500	10.699
BURSTSTART	2016-09-26 22:35:04	20137	30.095	17106	6.34423	100	OK	24698	10.8006		BURSTSTART	2016-09-26 22:38:04	20220	29.9865	4128	1.36871	100	OK	24491	10.6952
BURSTSTART	2016-09-26 22:40:04	20136	30.0967	16034	5.93529	100	OK	24694	10.7989		BURSTSTART	2016-09-26 22:43:04	20221	29.9848	4039	1.33476	100	OK	24496	10.6973
BURSTSTART	2016-09-26 22:45:04	20140	30.09	19013	7.07169	100	OK	24694	10.7989		BURSTSTART	2016-09-26 22:48:04	20222	29.9832	3725	1.21498	100	OK	24497	10.6977
BURSTSTART	2016-09-26 22:50:04	20140	30.09	15009	5.54429	100	OK	24692	10.7981		BURSTSTART	2016-09-26 22:53:04	20221	29.9848	3981	1.31264	100	OK	24494	10.6964
BURSTSTART	2016-09-26 22:55:04	20142	30.0866	20357	7.58439	100	OK	24694	10.7989		BURSTSTART	2016-09-26 22:58:04	20220	29.9865	4128	1.36871	100	OK	24489	10.6944
BURSTSTART	2016-09-26 23:00:04	20142	30.0866	16946	6.28319	100	OK	24694	10.7989		BURSTSTART	2016-09-26 23:03:04	20220	29.9865	4301	1.43471	100	OK	24490	10.6948
BURSTSTART	2016-09-26 23:05:04	20152	30.0698	19563	7.2815	100	OK	24693	10.7985		BURSTSTART	2016-09-26 23:08:04	20220	29.9865	3483	1.12267	100	OK	24492	10.6956
BURSTSTART	2016-09-26 23:10:04	20148	30.0766	16257	6.02036	100	OK	24694	10.7989		BURSTSTART	2016-09-26 23:13:04	20219	29.9882	3446	1.10855	100	OK	24493	10.696
BURSTSTART	2016-09-26 23:15:04	20145	30.0816	15689	5.80368	100	OK	24693	10.7985		BURSTSTART	2016-09-26 23:18:04	20217	29.9915	3705	1.20735	100	OK	24490	10.6948
BURSTSTART	2016-09-26 23:20:04	20145	30.0816	15626	5.77965	100	OK	24696	10.7997		BURSTSTART	2016-09-26 23:23:04	20215	29.9949	3569	1.15547	100	OK	24496	10.6973
BURSTSTART	2016-09-26 23:25:04	20142	30.0866	15620	5.77736	100	OK	24692	10.7981		BURSTSTART	2016-09-26 23:28:04	20216	29.9932	3730	1.21689	100	OK	24492	10.6956
BURSTSTART	2016-09-26 23:30:04	20146	30.0799	13485	4.96293	100	OK	24691	10.7976		BURSTSTART	2016-09-26 23:33:04	20214	29.9965	3627	1.1776	100	OK	24490	10.6948
BURSTSTART	2016-09-26 23:35:04	20147	30.0782	13158	4.83818	100	OK	24693	10.7985		BURSTSTART	2016-09-26 23:38:04	20213	29.9982	3762	1.2291	100	OK	24489	10.6944
BURSTSTART	2016-09-26 23:40:04	20147	30.0782	15164	5.60341	100	OK	24696	10.7997		BURSTSTART	2016-09-26 23:43:04	20213	29.9982	3233	1.0273	100	OK	24489	10.6944
BURSTSTART	2016-09-26 23:45:04	20144	30.0833	15300	5.65529	100	OK	24694	10.7989		BURSTSTART	2016-09-26 23:48:04	20214	29.9965	4068	1.34583	100	OK	24490	10.6948
BURSTSTART	2016-09-26 23:50:04	20147	30.0782	14062	5.18303	100	OK	24694	10.7989		BURSTSTART	2016-09-26 23:53:04	20215	29.9949	3691	1.20201	100	OK	24493	10.696
BURSTSTART	2016-09-26 23:55:04	20150	30.0732	49173	18.5768	100	OK	24693	10.7985		BURSTSTART	2016-09-26 23:58:04	20215	29.9949	4076	1.34888	100	OK	24492	10.6956
BURSTSTART	2016-09-27 00:00:04	20148	30.0766	49918	18.861	100	OK	24688	10.7964		BURSTSTART	2016-09-27 00:03:04	20214	29.9965	3948	1.30005	100	OK	24489	10.6944
BURSTSTART	2016-09-27 00:05:04	20153	30.0682	14717	5.4329	100	OK	24692	10.7981		BURSTSTART	2016-09-27 00:08:04	20216	29.9932	5019	1.7086	100	OK	24490	10.6948
BURSTSTART	2016-09-27 00:10:04	20159	30.0581	18379	6.82984	100	OK	24692	10.7981		BURSTSTART	2016-09-27 00:13:04	20216	29.9932	3937	1.29585	100	OK	24490	10.6948
BURSTSTART	2016-09-27 00:15:04	20159	30.0581	17364	6.44265	100	OK	24694	10.7989		BURSTSTART	2016-09-27 00:18:04	20215	29.9949	3863	1.26763	100	OK	24489	10.6944
BURSTSTART	2016-09-27 00:20:04	20159	30.0581	16942	6.28167	100	OK	24694	10.7989		BURSTSTART	2016-09-27 00:23:04	20217	29.9915	3357	1.0746	100	OK	24485	10.6927
BURSTSTART	2016-09-27 00:25:04	20163	30.0514	16362	6.06041	100	OK	24694	10.7989		BURSTSTART	2016-09-27 00:28:04	20216	29.9932	3770	1.23215	100	OK	24489	10.6944
BURSTSTART	2016-09-27 00:30:04	20162	30.0531	24043	8.99048	100	OK	24693	10.7985		BURSTSTART	2016-09-27 00:33:04	20217	29.9915	3585	1.16158	100	OK	24489	10.6944
BURSTSTART	2016-09-27 00:35:04	20163	30.0514	18226	6.77147	100	OK	24690	10.7972		BURSTSTART	2016-09-27 00:38:04	20218	29.9899	3478	1.12076	100	OK	24490	10.6948
BURSTSTART	2016-09-27 00:40:04	20160	30.0564	15930	5.89562	100	OK	24694	10.7989		BURSTSTART	2016-09-27 00:43:04	20219	29.9882	4043	1.33629	100	OK	24491	10.6952
BURSTSTART	2016-09-27 00:45:04	20162	30.0531	18386	6.83251	100	OK	24694	10.7989		BURSTSTART	2016-09-27 00:48:04	20220	29.9865	3549	1.14784	100	OK	24493	10.696
BURSTSTART	2016-09-27 00:50:04	20165	30.048	18289	6.79551	100	OK	24696	10.7997		BURSTSTART	2016-09-27 00:53:04	20222	29.9832	3562	1.1528	100	OK	24489	10.6944
BURSTSTART	2016-09-27 00:55:04	20165	30.048	20514	7.64428	100	OK	24692	10.7981		BURSTSTART	2016-09-27 00:58:04	20225	29.9782	3643	1.1837	100	OK	24493	10.696
BURSTSTART	2016-09-27 01:00:04	20163	30.0514	15673	5.79758	100	OK	24693	10.7985		BURSTSTART	2016-09-27 01:03:04	20228	29.9731	3656	1.18866	100	OK	24490	10.6948
BURSTSTART	2016-09-27 01:05:04	20165	30.048	19543	7.27387	100	OK	24693	10.7985		BURSTSTART	2016-09-27 01:08:04	20227	29.9748	3616	1.1734	100	OK	24493	10.696
BURSTSTART	2016-09-27 01:10:04	20166	30.0464	24426	9.13659	100	OK	24692	10.7981		BURSTSTART	2016-09-27 01:13:04	20233	29.9648	3869	1.26991	100	OK	24496	10.6973
BURSTSTART	2016-09-27 01:15:04	20164	30.0497	20519	7.64618	100	OK	24693	10.7985		BURSTSTART	2016-09-27 01:18:04	20232	29.9665	3988	1.31531	100	OK	24494	10.6964
BURSTSTART	2016-09-27 01:20:04	20166	30.0464	22734	8.49114	100	OK	24697	10.8002		BURSTSTART	2016-09-27 01:23:04	20227	29.9748	3210	1.01852	100	OK	24492	10.6956
BURSTSTART	2016-09-27 01:25:04	20167	30.0447	21821	8.14286	100	OK	24692	10.7981		BURSTSTART	2016-09-27 01:28:04	20225	29.9782	3642	1.18332	100	OK	24492	10.6956
BURSTSTART	2016-09-27 01:30:04	20167	30.0447	23597	8.82035	100	OK	24690	10.7972		BURSTSTART	2016-09-27 01:33:04	20221	29.9848	3108	0.979615	100	OK	24494	10.6964
BURSTSTART	2016-09-27 01:35:04	20170	30.0397	22725	8.48771	100	OK	24691	10.7976		BURSTSTART	2016-09-27 01:38:04	20221	29.9848	3143	0.992966	100	OK	24490	10.6948
BURSTSTART	2016-09-27 01:40:04	20166	30.0464	22255	8.30842	100	OK	24689	10.7968		BURSTSTART	2016-09-27 01:43:04	20221	29.9848	3318	1.05972	100	OK	24491	10.6952
BURSTSTART	2016-09-27 01:45:04	20168	30.043	13967	5.14679	100	OK	24691	10.7976		BURSTSTART	2016-09-27 01:48:04	20222	29.9832	3504	1.13068	100	OK	24494	10.6964
BURSTSTART	2016-09-27 01:50:04	20165	30.048	22958	8.57659	100	OK	24690	10.7972		BURSTSTART	2016-09-27 01:53:04	20223	29.9815	4241	1.41182	100	OK	24493	10.696
BURSTSTART	2016-09-27 01:55:04	20165	30.048	20430	7.61223	100	OK	24690	10.7972		BURSTSTART	2016-09-27 01:58:04	20222	29.9832	3873	1.27144	100	OK	24494	10.6964
BURSTSTART	2016-09-27 02:00:04	20165	30.048	20136	7.50008	100	OK	24690	10.7972		BURSTSTART	2016-09-27 02:03:04	20223	29.9815	3573	1.157	100	OK	24494	10.6964
BURSTSTART	2016-09-27 02:05:04	20162	30.0531	28844	10.8219	100	OK	24693	10.7985		BURSTSTART	2016-09-27 02:08:04	20225	29.9782	3335	1.06621	100	OK	24491	10.6952
BURSTSTART	2016-09-27 02:10:04	20161	30.0547	23000	8.59261	100	OK	24690	10.7972		BURSTSTART	2016-09-27 02:13:04	20225	29.9782	4322	1.44272	100	OK	24494	10.6964
BURSTSTART	2016-09-27 02:15:04	20161	30.0547	22748	8.49648	100	OK	24690	10.7972		BURSTSTART	2016-09-27 02:18:04	20227	29.9748	3343	1.06926	100	OK	24495	10.6969
BURSTSTART	2016-09-27 02:20:04	20158	30.0598	24110	9.01604	100	OK	24690	10.7972		BURSTSTART	2016-09-27 02:23:04	20228	29.9731	3298	1.05209	100	OK	24494	10.6964
BURSTSTART	2016-09-27 02:25:04	20161	30.0547	23919	8.94318	100	OK	24692	10.7981		BURSTSTART	2016-09-27 02:28:04	20229	29.9715	3299	1.05248	100	OK	24493	10.696
BURSTSTART	2016-09-27 02:30:04	20158	30.0598	22167	8.27485	100	OK	24693	10.7985		BURSTSTART	2016-09-27 02:33:04	20228	29.9731	3668	1.19324	100	OK	24495	10.6969
BURSTSTART	2016-09-27 02:35:04	20158	30.0598	25287	9.46503	100	OK	24692	10.7981		BURSTSTART	2016-09-27 02:38:04	20228	29.9731	12296	4.48456	100	OK	24495	10.6969
BURSTSTART	2016-09-27 02:40:04	20159	30.0581	27117	10.1631	100	OK	24692	10.7981		BURSTSTART	2016-09-27 02:43:04	20229	29.9715	3749	1.22414	100	OK	24492	10.6956
BURSTSTART	2016-09-27 02:45:04	20153	30.0682	26067	9.76258	100	OK	24692	10.7981		BURSTSTART	2016-09-27 02:48:04	20231	29.9681	3343	1.06926	100	OK	24467	10.6851
BURSTSTART	2016-09-27 02:50:04	20154	30.0665	30668	11.5177	100	OK	24693	10.7985		BURSTSTART	2016-09-27 02:53:04	20230	29.9698	3877	1.27296	100	OK	24495	10.6969
BURSTSTART	2016-09-27 02:55:04	20149	30.0749	30181	11.3319	100	OK	24693	10.7985		BURSTSTART	2016-09-27 02:58:04	20231	29.9681	4125	1.36757	100	OK	24498	10.6981
BURSTSTART	2016-09-27 03:00:04	20149	30.0749	22212	8.29201	100	OK	24693	10.7985		BURSTSTART	2016-09-27 03:03:04	20233	29.9648	3918	1.28861	100	OK	24490	10.6948
BURSTSTART	2016-09-27 03:05:04	20146	30.0799	25503	9.54743	100	OK	24694	10.7989		BURSTSTART	2016-09-27 03:08:04	20233	29.9648	4070	1.34659	100	OK	24489	10.6944
BURSTSTART	2016-09-27 03:10:04	20147	30.0782	26581	9.95866	100	OK	24689	10.7968		BURSTSTART	2016-09-27 03:13:04	20234	29.9631	3964	1.30615	100	OK	24492	10.6956
BURSTSTART	2016-09-27 03:15:04	20144	30.0833	29082	10.9127	100	OK	24696	10.7997		BURSTSTART	2016-09-27 03:18:04	20233	29.9648	3202	1.01547	100	OK	24491	10.6952
BURSTSTART	2016-09-27 03:20:04	20141	30.0883	30598	11.491	100	OK	24692	10.7981		BURSTSTART	2016-09-27 03:23:04	20233	29.9648	3385	1.08528	100	OK	24495	10.6969
BURSTSTART	2016-09-27 03:25:04	20141	30.0883	33457	12.5816	100	OK	24694	10.7989		BURSTSTART	2016-09-27 03:28:04	20234	29.9631	3506	1.13144	100	OK	24496	10.6973
BURSTSTART	2016-09-27 03:30:04	20139	30.0916	31483	11.8286	100	OK	24696	10.7997		BURSTSTART	2016-09-27 03:33:04	20237	29.9581	4347	1.45226	100	OK	24492	10.6956
BURSTSTART	2016-09-27 03:35:04	20138	30.0933	31774	11.9396	100	OK	24693	10.7985		BURSTSTART	2016-09-27 03:38:04	20235	29.9614	3958	1.30386	100	OK	24493	10.696
BURSTSTART	2016-09-27 03:40:04	20139	30.0916	31767	11.937	100	OK	24695	10.7993		BURSTSTART	2016-09-27 03:43:04	20235	29.9614	3900	1.28174	100	OK	24493	10.696
BURSTSTART	2016-09-27 03:45:04	20138	30.0933	31147	11.7004	100	OK	24697	10.8002		BURSTSTART	2016-09-27 03:48:04	20238	29.9564	3421	1.09902	100	OK	24493	10.696
BURSTSTART	2016-09-27 03:50:04	20139	30.0916	33437	12.574	100	OK	24698	10.8006		BURSTSTART	2016-09-27 03:53:04	20241	29.9514	3689	1.20125	100	OK	24494	10.6964
BURSTSTART	2016-09-27 03:55:04	20138	30.0933	38614	14.5489	100	OK	24698	10.8006		BURSTSTART	2016-09-27 03:58:04	20243	29.9481	3914	1.28708	100	OK	24493	10.696
BURSTSTART	2016-09-27 04:00:04	20138	30.0933	32629	12.2658	100	OK	24697	10.8002		BURSTSTART	2016-09-27 04:03:04	20243	29.9481	3808	1.24664	100	OK	24500	10.699
BURSTSTART	2016-09-27 04:05:04	20136	30.0967	35949	13.5323	100	OK	24699	10.801		BURSTSTART	2016-09-27 04:08:04	20247	29.9414	3973	1.30959	100	OK	24496	10.6973
BURSTSTART	2016-09-27 04:10:04	20135	30.0984	32809	12.3345	100	OK	24697	10.8002		BURSTSTART	2016-09-27 04:13:04	20250	29.9364	5243	1.79405	100	OK	24499	10.6985
BURSTSTART	2016-09-27 04:15:04	20137	30.095	36882	13.8882	100	OK	24697	10.8002		BURSTSTART	2016-09-27 04:18:04	20256	29.9264	4115	1.36376	100	OK	24493	10.696
BURSTSTART	2016-09-27 04:20:04	20135	30.0984	33906	12.7529	100	OK	24697	10.8002		BURSTSTART	2016-09-27 04:23:04	20261	29.918	3917	1.28822	100	OK	24494	10.6964
BURSTSTART	2016-09-27 04:25:04	20137	30.095	41665	15.7127	100	OK	24696	10.7997		BURSTSTART	2016-09-27 04:28:04	20263	29.9147	4007	1.32256	100	OK	24497	10.6977
BURSTSTART	2016-09-27 04:30:04	20136	30.0967	36868	13.8828	100	OK	24695	10.7993		BURSTSTART	2016-09-27 04:33:04	20263	29.9147	3895	1.27983	100	OK	24494	10.6964
BURSTSTART	2016-09-27 04:35:04	20136	30.0967	37368	14.0736	100	OK	24697	10.8002		BURSTSTART	2016-09-27 04:38:04	20259	29.9214	4436	1.48621	100	OK	24497	10.6977
BURSTSTART	2016-09-27 04:40:04	20136	30.0967	39742	14.9792	100	OK	24697	10.8002		BURSTSTART	2016-09-27 04:43:04	20256	29.9264	3597	1.16615	100	OK	24502	10.6998
BURSTSTART	2016-09-27 04:45:04	20134	30.1	37920	14.2841	100	OK	24699	10.801		BURSTSTART	2016-09-27 04:48:04	20257	29.9247	3554	1.14975	100	OK	24495	10.6969
BURSTSTART	2016-09-27 04:50:04	20132	30.1034	39509	14.8903	100	OK	24698	10.8006		BURSTSTART	2016-09-27 04:53:04	20257	29.9247	4248	1.41449	100	OK	24502	10.6998
BURSTSTART	2016-09-27 04:55:04	20131	30.1051	34833	13.1065	100	OK	24698	10.8006		BURSTSTART	2016-09-27 04:58:04	20255	29.928	4090	1.35422	100	OK	24496	10.6973
BURSTSTART	2016-09-27 05:00:04	20134	30.1	39820	15.0089	100	OK	24699	10.801		BURSTSTART	2016-09-27 05:03:04	20256	29.9264	4033	1.33248	100	OK	24496	10.6973
BURSTSTART	2016-09-27 05:05:04	20137	30.095	42169	15.905	100	OK	24698	10.8006		BURSTSTART	2016-09-27 05:08:04	20258	29.923	4048	1.3382	100	OK	24502	10.6998
BURSTSTART	2016-09-27 05:10:04	20136	30.0967	40983	15.4526	100	OK	24694	10.7989		BURSTSTART	2016-09-27 05:13:04	20260	29.9197	3725	1.21498	100	OK	24498	10.6981
BURSTSTART	2016-09-27 05:15:04	20144	30.0833	39343	14.827	100	OK	24695	10.7993		BURSTSTART	2016-09-27 05:18:04	20258	29.923	4333	1.44692	100	OK	24497	10.6977
BURSTSTART	2016-09-27 05:20:04	20144	30.0833	33012	12.4119	100	OK	24696	10.7997		BURSTSTART	2016-09-27 05:23:04	20262	29.9163	3952	1.30158	100	OK	24502	10.6998
BURSTSTART	2016-09-27 05:25:04	20141	30.0883	32307	12.143	100	OK	24694	10.7989		BURSTSTART	2016-09-27 05:28:04	20263	29.9147	3784	1.23749	100	OK	24495	10.6969
BURSTSTART	2016-09-27 05:30:04	20146	30.0799	34100	12.8269	100	OK	24695	10.7993		BURSTSTART	2016-09-27 05:33:04	20263	29.9147	3764	1.22986	100	OK	24498	10.6981
BURSTSTART	2016-09-27 05:35:04	20148	30.0766	39547	14.9048	100	OK	24696	10.7997		BURSTSTART	2016-09-27 05:38:04	20262	29.9163	3711	1.20964	100	OK	24501	10.6994
BURSTSTART	2016-09-27 05:40:04	20150	30.0732	48107	18.1702	100	OK	24697	10.8002		BURSTSTART	2016-09-27 05:43:04	20260	29.9197	3729	1.21651	100	OK	24497	10.6977
BURSTSTART	2016-09-27 05:45:04	20151	30.0715	29742	11.1645	100	OK	24693	10.7985		BURSTSTART	2016-09-27 05:48:04	20260	29.9197	4626	1.55869	100	OK	24495	10.6969
BURSTSTART	2016-09-27 05:50:04	20153	30.0682	37888	14.2719	100	OK	24694	10.7989		BURSTSTART	2016-09-27 05:53:04	20262	29.9163	6258	2.18125	100	OK	24493	10.696
BURSTSTART	2016-09-27 05:55:04	20156	30.0631	45121	17.0311	100	OK	24692	10.7981		BURSTSTART	2016-09-27 05:58:04	20261	29.918	7238	2.55509	100	OK	24494	10.6964
BURSTSTART	2016-09-27 06:00:04	20158	30.0598	10911	19.8784	20	OK	24685	10.7951		BURSTSTART	2016-09-27 06:03:04	20261	29.918	3792	1.24054	100	OK	24493	10.696
BURSTSTART	2016-09-27 06:05:04	20159	30.0581	43005	16.2239	100	OK	24692	10.7981		BURSTSTART	2016-09-27 06:08:04	20263	29.9147	4202	1.39694	100	OK	24494	10.6964
BURSTSTART	2016-09-27 06:10:04	20163	30.0514	15319	5.66254	100	OK	24693	10.7985		BURSTSTART	2016-09-27 06:13:04	20263	29.9147	4288	1.42975	100	OK	24497	10.6977
BURSTSTART	2016-09-27 06:15:04	20168	30.043	25613	9.58939	100	OK	24692	10.7981		BURSTSTART	2016-09-27 06:18:04	20263	29.9147	4528	1.5213	100	OK	24496	10.6973
BURSTSTART	2016-09-27 06:20:04	20173	30.0346	34028	12.7995	100	OK	24691	10.7976		BURSTSTART	2016-09-27 06:23:04	20266	29.9097	5369	1.84212	100	OK	24497	10.6977
BURSTSTART	2016-09-27 06:25:04	20174	30.033	27972	10.4893	100	OK	24693	10.7985		BURSTSTART	2016-09-27 06:28:04	20262	29.9163	5421	1.86196	100	OK	24496	10.6973
BURSTSTART	2016-09-27 06:30:04	20176	30.0296	15484	5.72548	100	OK	24690	10.7972		BURSTSTART	2016-09-27 06:33:04	20265	29.9113	9096	3.26386	100	OK	24493	10.696
BURSTSTART	2016-09-27 06:35:04	20176	30.0296	12604	4.62685	100	OK	24692	10.7981		BURSTSTART	2016-09-27 06:38:04	20266	29.9097	7100	2.50244	100	OK	24496	10.6973
BURSTSTART	2016-09-27 06:40:04	20174	30.033	27666	10.3726	100	OK	24692	10.7981		BURSTSTART	2016-09-27 06:43:04	20267	29.908	8295	2.9583	100	OK	24496	10.6973
BURSTSTART	2016-09-27 06:45:04	20174	30.033	22403	8.36487	100	OK	24689	10.7968		BURSTSTART	2016-09-27 06:48:04	20265	29.9113	7853	2.78969	100	OK	24496	10.6973
BURSTSTART	2016-09-27 06:50:04	20175	30.0313	11526	4.21563	100	OK	24692	10.7981		BURSTSTART	2016-09-27 06:53:04	20264	29.913	8619	3.0819	100	OK	24497	10.6977
BURSTSTART	2016-09-27 06:55:04	20174	30.033	11422	4.17595	100	OK	24690	10.7972		BURSTSTART	2016-09-27 06:58:04	20265	29.9113	7719	2.73857	100	OK	24492	10.6956
BURSTSTART	2016-09-27 07:00:04	20177	30.0279	12407	4.5517	100	OK	24690	10.7972		BURSTSTART	2016-09-27 07:03:04	20274	29.8963	14315	5.25475	100	OK	24501	10.6994
BURSTSTART	2016-09-27 07:05:04	20178	30.0263	14787	5.4596	100	OK	24689	10.7968		BURSTSTART	2016-09-27 07:08:04	20272	29.8997	9155	3.28636	100	OK	24496	10.6973
BURSTSTART	2016-09-27 07:10:04	20181	30.0212	9492	3.43972	100	OK	24690	10.7972		BURSTSTART	2016-09-27 07:13:04	20272	29.8997	6824	2.39716	100	OK	24493	10.696
BURSTSTART	2016-09-27 07:15:04	20180	30.0229	21821	8.14286	100	OK	24689	10.7968		BURSTSTART	2016-09-27 07:18:04	20274	29.8963	8179	2.91405	100	OK	24497	10.6977
BURSTSTART	2016-09-27 07:20:04	20184	30.0162	51102	19.3127	100	OK	24690	10.7972		BURSTSTART	2016-09-27 07:23:04	20279	29.888	11538	4.19541	100	OK	24495	10.6969
BURSTSTART	2016-09-27 07:25:04	20181	30.0212	27077	10.1479	100	OK	24693	10.7985		BURSTSTART	2016-09-27 07:28:04	20278	29.8896	6616	2.31781	100	OK	24497	10.6977
BURSTSTART	2016-09-27 07:30:04	20185	30.0145	10955	3.99781	100	OK	24692	10.7981		BURSTSTART	2016-09-27 07:33:04	20275	29.8947	8329	2.97127	100	OK	24493	10.696
BURSTSTART	2016-09-27 07:35:04	20184	30.0162	12989	4.77372	100	OK	24692	10.7981		BURSTSTART	2016-09-27 07:38:04	20276	29.893	5595	1.92833	100	OK	24495	10.6969
BURSTSTART	2016-09-27 07:40:04	20190	30.0062	8317	2.99149	100	OK	24690	10.7972		BURSTSTART	2016-09-27 07:43:04	20275	29.8947	5101	1.73988	100	OK	24498	10.6981
BURSTSTART	2016-09-27 07:45:04	20188	30.0095	8296	2.98348	100	OK	24690	10.7972		BURSTSTART	2016-09-27 07:48:04	20276	29.893	7086	2.4971	100	OK	24494	10.6964
BURSTSTART	2016-09-27 07:50:04	20190	30.0062	10053	3.65372	100	OK	24687	10.796		BURSTSTART	2016-09-27 07:53:04	20275	29.8947	4696	1.58539	100	OK	24495	10.6969
BURSTSTART	2016-09-27 07:55:04	20187	30.0112	14336	5.28756	100	OK	24689	10.7968		BURSTSTART	2016-09-27 07:58:04	20276	29.893	5051	1.72081	100	OK	24496	10.6973
BURSTSTART	2016-09-27 08:00:04	20191	30.0045	13042	4.79393	100	OK	24690	10.7972		BURSTSTART	2016-09-27 08:03:04	20278	29.8896	6523	2.28233	100	OK	24499	10.6985
BURSTSTART	2016-09-27 08:05:04	20191	30.0045	10294	3.74565	100	OK	24690	10.7972		BURSTSTART	2016-09-27 08:08:04	20278	29.8896	9877	3.56178	100	OK	24500	10.699
BURSTSTART	2016-09-27 08:10:04	20189	30.0078	8422	3.03154	100	OK	24690	10.7972		BURSTSTART	2016-09-27 08:13:04	20274	29.8963	10035	3.62206	100	OK	24494	10.6964
BURSTSTART	2016-09-27 08:15:04	20189	30.0078	9262	3.35198	100	OK	24688	10.7964		BURSTSTART	2016-09-27 08:18:04	20276	29.893	6422	2.24381	100	OK	24495	10.6969
BURSTSTART	2016-09-27 08:20:04	20193	30.0011	10075	3.66211	100	OK	24688	10.7964		BURSTSTART	2016-09-27 08:23:04	20277	29.8913	5627	1.94054	100	OK	24498	10.6981
BURSTSTART	2016-09-27 08:25:04	20193	30.0011	9110	3.29399	100	OK	24689	10.7968		BURSTSTART	2016-09-27 08:28:04	20279	29.888	5476	1.88294	100	OK	24497	10.6977
BURSTSTART	2016-09-27 08:30:04	20192	30.0028	11446	4.18511	100	OK	24689	10.7968		BURSTSTART	2016-09-27 08:33:04	20281	29.8846	4631	1.56059	100	OK	24498	10.6981
BURSTSTART	2016-09-27 08:35:04	20188	30.0095	10972	4.00429	100	OK	24690	10.7972		BURSTSTART	2016-09-27 08:38:04	20284	29.8796	6992	2.46124	100	OK	24497	10.6977
BURSTSTART	2016-09-27 08:40:04	20187	30.0112	12494	4.58489	100	OK	24688	10.7964		BURSTSTART	2016-09-27 08:43:04	20287	29.8746	8449	3.01705	100	OK	24496	10.6973
BURSTSTART	2016-09-27 08:45:04	20184	30.0162	7219	2.57263	100	OK	24689	10.7968		BURSTSTART	2016-09-27 08:48:04	20285	29.878	8397	2.99721	100	OK	24496	10.6973
BURSTSTART	2016-09-27 08:50:04	20182	30.0196	9321	3.37448	100	OK	24689	10.7968		BURSTSTART	2016-09-27 08:53:04	20287	29.8746	10024	3.61786	100	OK	24496	10.6973
BURSTSTART	2016-09-27 08:55:04	20186	30.0129	8239	2.96173	100	OK	24691	10.7976		BURSTSTART	2016-09-27 08:58:04	20286	29.8763	8109	2.88735	100	OK	24497	10.6977
BURSTSTART	2016-09-27 09:00:04	20184	30.0162	7452	2.66152	100	OK	24690	10.7972		BURSTSTART	2016-09-27 09:03:04	20286	29.8763	6619	2.31896	100	OK	24497	10.6977
BURSTSTART	2016-09-27 09:05:04	20189	30.0078	9253	3.34854	100	OK	24688	10.7964		BURSTSTART	2016-09-27 09:08:04	20286	29.8763	5169	1.76582	100	OK	24498	10.6981
BURSTSTART	2016-09-27 09:10:04	20189	30.0078	9435	3.41797	100	OK	24690	10.7972		BURSTSTART	2016-09-27 09:13:04	20286	29.8763	7302	2.5795	100	OK	24503	10.7002
BURSTSTART	2016-09-27 09:15:04	20186	30.0129	12130	4.44603	100	OK	24691	10.7976		BURSTSTART	2016-09-27 09:18:04	20281	29.8846	9044	3.24402	100	OK	24501	10.6994
BURSTSTART	2016-09-27 09:20:04	20189	30.0078	12044	4.41323	100	OK	24690	10.7972		BURSTSTART	2016-09-27 09:23:04	20283	29.8813	5135	1.75286	100	OK	24496	10.6973
BURSTSTART	2016-09-27 09:25:04	20191	30.0045	9474	3.43285	100	OK	24690	10.7972		BURSTSTART	2016-09-27 09:28:04	20281	29.8846	5372	1.84326	100	OK	24496	10.6973
BURSTSTART	2016-09-27 09:30:04	20191	30.0045	10186	3.70445	100	OK	24690	10.7972		BURSTSTART	2016-09-27 09:33:04	20283	29.8813	6058	2.10495	100	OK	24498	10.6981
BURSTSTART	2016-09-27 09:35:04	20194	29.9995	8975	3.24249	100	OK	24690	10.7972		BURSTSTART	2016-09-27 09:38:04	20282	29.883	8450	3.01743	100	OK	24498	10.6981
BURSTSTART	2016-09-27 09:40:04	20193	30.0011	10385	3.78037	100	OK	24690	10.7972		BURSTSTART	2016-09-27 09:43:04	20281	29.8846	10629	3.84865	100	OK	24496	10.6973
BURSTSTART	2016-09-27 09:45:04	20193	30.0011	10015	3.63922	100	OK	24691	10.7976		BURSTSTART	2016-09-27 09:48:04	20282	29.883	5099	1.73912	100	OK	24501	10.6994
BURSTSTART	2016-09-27 09:50:04	20193	30.0011	11255	4.11225	100	OK	24692	10.7981		BURSTSTART	2016-09-27 09:53:04	20279	29.888	5284	1.80969	100	OK	24493	10.696
BURSTSTART	2016-09-27 09:55:04	20189	30.0078	10322	3.75633	100	OK	24690	10.7972		BURSTSTART	2016-09-27 09:58:04	20278	29.8896	7532	2.66724	100	OK	24498	10.6981
BURSTSTART	2016-09-27 10:00:04	20188	30.0095	11404	4.16909	100	OK	24690	10.7972		BURSTSTART	2016-09-27 10:03:04	20275	29.8947	7806	2.77176	100	OK	24495	10.6969
BURSTSTART	2016-09-27 10:05:04	20189	30.0078	12093	4.43192	100	OK	24690	10.7972		BURSTSTART	2016-09-27 10:08:04	20274	29.8963	7078	2.49405	100	OK	24493	10.696
BURSTSTART	2016-09-27 10:10:04	20190	30.0062	12810	4.70543	100	OK	24691	10.7976		BURSTSTART	2016-09-27 10:13:04	20274	29.8963	10112	3.65143	100	OK	24493	10.696
BURSTSTART	2016-09-27 10:15:04	20187	30.0112	13233	4.86679	100	OK	24691	10.7976		BURSTSTART	2016-09-27 10:18:04	20270	29.903	7675	2.72179	100	OK	24493	10.696
BURSTSTART	2016-09-27 10:20:04	20186	30.0129	18201	6.76194	100	OK	24690	10.7972		BURSTSTART	2016-09-27 10:23:04	20272	29.8997	6605	2.31361	100	OK	24495	10.6969
BURSTSTART	2016-09-27 10:25:04	20186	30.0129	18517	6.88248	100	OK	24691	10.7976		BURSTSTART	2016-09-27 10:28:04	20269	29.9047	10153	3.66707	100	OK	24494	10.6964
BURSTSTART	2016-09-27 10:30:04	20184	30.0162	10185	3.70407	100	OK	24693	10.7985		BURSTSTART	2016-09-27 10:33:04	20267	29.908	9820	3.54004	100	OK	24497	10.6977
BURSTSTART	2016-09-27 10:35:04	20186	30.0129	14590	5.38445	100	OK	24691	10.7976		BURSTSTART	2016-09-27 10:38:04	20265	29.9113	8896	3.18756	100	OK	24489	10.6944
BURSTSTART	2016-09-27 10:40:04	20187	30.0112	11821	4.32816	100	OK	24689	10.7968		BURSTSTART	2016-09-27 10:43:04	20262	29.9163	10486	3.7941	100	OK	24492	10.6956
BURSTSTART	2016-09-27 10:45:04	20186	30.0129	15588	5.76516	100	OK	24692	10.7981		BURSTSTART	2016-09-27 10:48:04	20260	29.9197	10369	3.74947	100	OK	24494	10.6964
BURSTSTART	2016-09-27 10:50:04	20189	30.0078	16763	6.21338	100	OK	24691	10.7976		BURSTSTART	2016-09-27 10:53:04	20261	29.918	8595	3.07274	100	OK	24493	10.696
BURSTSTART	2016-09-27 10:55:04	20187	30.0112	12484	4.58107	100	OK	24688	10.7964		BURSTSTART	2016-09-27 10:58:04	20260	29.9197	5926	2.0546	100	OK	24491	10.6952
BURSTSTART	2016-09-27 11:00:04	20194	29.9995	16350	6.05584	100	OK	24690	10.7972		BURSTSTART	2016-09-27 11:03:04	20259	29.9214	10067	3.63427	100	OK	24495	10.6969
BURSTSTART	2016-09-27 11:05:04	20191	30.0045	16808	6.23055	100	OK	24690	10.7972		BURSTSTART	2016-09-27 11:08:04	20256	29.9264	13203	4.83055	100	OK	24492	10.6956
BURSTSTART	2016-09-27 11:10:04	20187	30.0112	13403	4.93164	100	OK	24689	10.7968		BURSTSTART	2016-09-27 11:13:04	20255	29.928	10098	3.64609	100	OK	24492	10.6956
BURSTSTART	2016-09-27 11:15:04	20191	30.0045	12819	4.70887	100	OK	24688	10.7964		BURSTSTART	2016-09-27 11:18:04	20254	29.9297	12077	4.40102	100	OK	24493	10.696
BURSTSTART	2016-09-27 11:20:04	20192	30.0028	15425	5.70298	100	OK	24690	10.7972		BURSTSTART	2016-09-27 11:23:04	20254	29.9297	6810	2.39182	100	OK	24496	10.6973
BURSTSTART	2016-09-27 11:25:04	20189	30.0078	12886	4.73442	100	OK	24688	10.7964		BURSTSTART	2016-09-27 11:28:04	20247	29.9414	9378	3.37143	100	OK	24491	10.6952
BURSTSTART	2016-09-27 11:30:04	20190	30.0062	13077	4.80729	100	OK	24690	10.7972		BURSTSTART	2016-09-27 11:33:04	20249	29.9381	14084	5.16663	100	OK	24492	10.6956
BURSTSTART	2016-09-27 11:35:04	20190	30.0062	13175	4.84467	100	OK	24690	10.7972		BURSTSTART	2016-09-27 11:38:04	20244	29.9464	23911	8.91534	100	OK	24489	10.6944
BURSTSTART	2016-09-27 11:40:04	20192	30.0028	15360	5.67818	100	OK	24689	10.7968		BURSTSTART	2016-09-27 11:43:04	20241	29.9514	13025	4.76265	100	OK	24491	10.6952
BURSTSTART	2016-09-27 11:45:04	20192	30.0028	13665	5.03159	100	OK	24690	10.7972		BURSTSTART	2016-09-27 11:48:04	20238	29.9564	10622	3.84598	100	OK	24496	10.6973
BURSTSTART	2016-09-27 11:50:04	20191	30.0045	15080	5.57137	100	OK	24694	10.7989		BURSTSTART	2016-09-27 11:53:04	20233	29.9648	14601	5.36385	100	OK	24489	10.6944
BURSTSTART	2016-09-27 11:55:04	20189	30.0078	15118	5.58587	100	OK	24692	10.7981		BURSTSTART	2016-09-27 11:58:04	20228	29.9731	7872	2.79694	100	OK	24487	10.6935
BURSTSTART	2016-09-27 12:00:04	20190	30.0062	17266	6.40526	100	OK	24690	10.7972		BURSTSTART	2016-09-27 12:03:04	20226	29.9765	18529	6.86226	100	OK	24482	10.6914
BURSTSTART	2016-09-27 12:05:04	20187	30.0112	15510	5.7354	100	OK	24693	10.7985		BURSTSTART	2016-09-27 12:08:04	20221	29.9848	10162	3.6705	100	OK	24483	10.6918
BURSTSTART	2016-09-27 12:10:04	20185	30.0145	16081	5.95322	100	OK	24696	10.7997		BURSTSTART	2016-09-27 12:13:04	20220	29.9865	11251	4.08592	100	OK	24484	10.6923
BURSTSTART	2016-09-27 12:15:04	20188	30.0095	15207	5.61982	100	OK	24693	10.7985		BURSTSTART	2016-09-27 12:18:04	20210	30.0032	13328	4.87824	100	OK	24483	10.6918
BURSTSTART	2016-09-27 12:20:04	20187	30.0112	18615	6.91987	100	OK	24691	10.7976		BURSTSTART	2016-09-27 12:23:04	20202	30.0166	9052	3.24707	100	OK	24483	10.6918
BURSTSTART	2016-09-27 12:25:04	20185	30.0145	15441	5.70908	100	OK	24695	10.7993		BURSTSTART	2016-09-27 12:28:04	20193	30.0317	8091	2.88048	100	OK	24482	10.6914
BURSTSTART	2016-09-27 12:30:04	20180	30.0229	17283	6.41175	100	OK	24696	10.7997		BURSTSTART	2016-09-27 12:33:04	20190	30.0367	24722	9.22471	100	OK	24481	10.691
BURSTSTART	2016-09-27 12:35:04	20184	30.0162	19788	7.36733	100	OK	24692	10.7981		BURSTSTART	2016-09-27 12:38:04	20184	30.0467	9586	3.45078	100	OK	24482	10.6914
BURSTSTART	2016-09-27 12:40:04	20182	30.0196	16483	6.10657	100	OK	24693	10.7985		BURSTSTART	2016-09-27 12:43:04	20185	30.0451	8570	3.0632	100	OK	24480	10.6906
BURSTSTART	2016-09-27 12:45:04	20179	30.0246	19483	7.25098	100	OK	24692	10.7981		BURSTSTART	2016-09-27 12:48:04	20177	30.0584	17742	6.56205	100	OK	24484	10.6923
BURSTSTART	2016-09-27 12:50:04	20182	30.0196	18431	6.84968	100	OK	24694	10.7989		BURSTSTART	2016-09-27 12:53:04	20179	30.0551	21569	8.02193	100	OK	24480	10.6906
BURSTSTART	2016-09-27 12:55:04	20178	30.0263	20351	7.5821	100	OK	24693	10.7985		BURSTSTART	2016-09-27 12:58:04	20175	30.0618	7545	2.6722	100	OK	24480	10.6906
BURSTSTART	2016-09-27 13:00:04	20182	30.0196	16782	6.22063	100	OK	24694	10.7989		BURSTSTART	2016-09-27 13:03:04	20175	30.0618	8107	2.88658	100	OK	24482	10.6914
BURSTSTART	2016-09-27 13:05:04	20177	30.0279	19342	7.19719	100	OK	24691	10.7976		BURSTSTART	2016-09-27 13:08:04	20173	30.0651	14301	5.24941	100	OK	24481	10.691
BURSTSTART	2016-09-27 13:10:04	20181	30.0212	18647	6.93207	100	OK	24694	10.7989		BURSTSTART	2016-09-27 13:13:04	20168	30.0735	8048	2.86408	100	OK	24482	10.6914
BURSTSTART	2016-09-27 13:15:04	20179	30.0246	17385	6.45066	100	OK	24693	10.7985		BURSTSTART	2016-09-27 13:18:04	20168	30.0735	27555	10.3054	100	OK	24480	10.6906
BURSTSTART	2016-09-27 13:20:04	20178	30.0263	18655	6.93512	100	OK	24695	10.7993		BURSTSTART	2016-09-27 13:23:04	20163	30.0819	13601	4.98238	100	OK	24479	10.6902
BURSTSTART	2016-09-27 13:25:04	20178	30.0263	18012	6.68984	100	OK	24694	10.7989		BURSTSTART	2016-09-27 13:28:04	20160	30.0869	7215	2.54631	100	OK	24481	10.691
BURSTSTART	2016-09-27 13:30:04	20177	30.0279	19552	7.2773	100	OK	24693	10.7985		BURSTSTART	2016-09-27 13:33:04	20159	30.0886	8464	3.02277	100	OK	24480	10.6906
BURSTSTART	2016-09-27 13:35:04	20178	30.0263	18021	6.69327	100	OK	24696	10.7997		BURSTSTART	2016-09-27 13:38:04	20158	30.0903	10056	3.63007	100	OK	24482	10.6914
BURSTSTART	2016-09-27 13:40:04	20177	30.0279	19327	7.19147	100	OK	24698	10.8006		BURSTSTART	2016-09-27 13:43:04	20159	30.0886	9769	3.52059	100	OK	24482	10.6914
BURSTSTART	2016-09-27 13:45:04	20175	30.0313	18427	6.84815	100	OK	24693	10.7985		BURSTSTART	2016-09-27 13:48:04	20148	30.107	8915	3.19481	100	OK	24478	10.6897
BURSTSTART	2016-09-27 13:50:04	20178	30.0263	20435	7.61414	100	OK	24696	10.7997		BURSTSTART	2016-09-27 13:53:04	20149	30.1053	6190	2.1553	100	OK	24476	10.6889
BURSTSTART	2016-09-27 13:55:04	20179	30.0246	17890	6.6433	100	OK	24697	10.8002		BURSTSTART	2016-09-27 13:58:04	20143	30.1154	6196	2.15759	100	OK	24479	10.6902
BURSTSTART	2016-09-27 14:00:04	20174	30.033	19256	7.16439	100	OK	24692	10.7981		BURSTSTART	2016-09-27 14:03:04	20140	30.1204	5871	2.03362	100	OK	24480	10.6906
BURSTSTART	2016-09-27 14:05:04	20169	30.0413	18165	6.7482	100	OK	24696	10.7997		BURSTSTART	2016-09-27 14:08:04	20131	30.1355	8796	3.14942	100	OK	24475	10.6885
BURSTSTART	2016-09-27 14:10:04	20167	30.0447	20458	7.62291	100	OK	24699	10.801		BURSTSTART	2016-09-27 14:13:04	20126	30.1439	5766	1.99356	100	OK	24478	10.6897
BURSTSTART	2016-09-27 14:15:04	20165	30.048	19759	7.35627	100	OK	24695	10.7993		BURSTSTART	2016-09-27 14:18:04	20130	30.1372	9083	3.2589	100	OK	24478	10.6897
BURSTSTART	2016-09-27 14:20:04	20162	30.0531	20592	7.67403	100	OK	24697	10.8002		BURSTSTART	2016-09-27 14:23:04	20120	30.154	8971	3.21617	100	OK	24478	10.6897
BURSTSTART	2016-09-27 14:25:04	20157	30.0615	21502	8.02117	100	OK	24693	10.7985		BURSTSTART	2016-09-27 14:28:04	20127	30.1422	5179	1.76964	100	OK	24478	10.6897
BURSTSTART	2016-09-27 14:30:04	20154	30.0665	23275	8.69752	100	OK	24694	10.7989		BURSTSTART	2016-09-27 14:33:04	20128	30.1405	8891	3.18566	100	OK	24478	10.6897
BURSTSTART	2016-09-27 14:35:04	20154	30.0665	24052	8.99392	100	OK	24697	10.8002		BURSTSTART	2016-09-27 14:38:04	20130	30.1372	11229	4.07753	100	OK	24478	10.6897
BURSTSTART	2016-09-27 14:40:04	20149	30.0749	22808	8.51937	100	OK	24695	10.7993		BURSTSTART	2016-09-27 14:43:04	20124	30.1472	4404	1.474	100	OK	24477	10.6893
BURSTSTART	2016-09-27 14:45:04	20146	30.0799	22213	8.2924	100	OK	24694	10.7989		BURSTSTART	2016-09-27 14:48:04	20114	30.164	5417	1.86043	100	OK	24478	10.6897
BURSTSTART	2016-09-27 14:50:04	20140	30.09	22481	8.39463	100	OK	24697	10.8002		BURSTSTART	2016-09-27 14:53:04	20120	30.154	5936	2.05841	100	OK	24478	10.6897
BURSTSTART	2016-09-27 14:55:04	20136	30.0967	23540	8.79861	100	OK	24699	10.801		BURSTSTART	2016-09-27 14:58:04	20118	30.1573	8179	2.91405	100	OK	24477	10.6893
BURSTSTART	2016-09-27 15:00:04	20132	30.1034	20712	7.71981	100	OK	24699	10.801		BURSTSTART	2016-09-27 15:03:04	20114	30.164	4434	1.48544	100	OK	24477	10.6893
BURSTSTART	2016-09-27 15:05:04	20129	30.1084	25532	9.55849	100	OK	24699	10.801		BURSTSTART	2016-09-27 15:08:04	20118	30.1573	26005	9.71413	100	OK	24476	10.6889
BURSTSTART	2016-09-27 15:10:04	20134	30.1	23415	8.75092	100	OK	24699	10.801		BURSTSTART	2016-09-27 15:13:04	20115	30.1623	7875	2.79808	100	OK	24477	10.6893
BURSTSTART	2016-09-27 15:15:04	20132	30.1034	23348	8.72536	100	OK	24699	10.801		BURSTSTART	2016-09-27 15:18:04	20112	30.1674	8500	3.0365	100	OK	24477	10.6893
BURSTSTART	2016-09-27 15:20:04	20133	30.1017	22436	8.37746	100	OK	24701	10.8018		BURSTSTART	2016-09-27 15:23:04	20118	30.1573	4328	1.44501	100	OK	24477	10.6893
BURSTSTART	2016-09-27 15:25:04	20131	30.1051	24010	8.9779	100	OK	24701	10.8018		BURSTSTART	2016-09-27 15:28:04	20124	30.1472	20781	7.72133	100	OK	24484	10.6923
BURSTSTART	2016-09-27 15:30:04	20132	30.1034	23505	8.78525	100	OK	24700	10.8014		BURSTSTART	2016-09-27 15:33:04	20121	30.1523	5050	1.72043	100	OK	24480	10.6906
BURSTSTART	2016-09-27 15:35:04	20132	30.1034	24287	9.08356	100	OK	24699	10.801		BURSTSTART	2016-09-27 15:38:04	20126	30.1439	3416	1.09711	100	OK	24479	10.6902
BURSTSTART	2016-09-27 15:40:04	20122	30.1202	23696	8.85811	100	OK	24699	10.801		BURSTSTART	2016-09-27 15:43:04	20129	30.1389	8046	2.86331	100	OK	24481	10.691
BURSTSTART	2016-09-27 15:45:04	20117	30.1286	28690	10.7632	100	OK	24701	10.8018		BURSTSTART	2016-09-27 15:48:04	20125	30.1456	5107	1.74217	100	OK	24478	10.6897
BURSTSTART	2016-09-27 15:50:04	20123	30.1185	23470	8.7719	100	OK	24700	10.8014		BURSTSTART	2016-09-27 15:53:04	20122	30.1506	8209	2.92549	100	OK	24478	10.6897
BURSTSTART	2016-09-27 15:55:04	20121	30.1219	24346	9.10607	100	OK	24701	10.8018		BURSTSTART	2016-09-27 15:58:04	20120	30.154	8193	2.91939	100	OK	24477	10.6893
BURSTSTART	2016-09-27 16:00:04	20123	30.1185	21940	8.18825	100	OK	24700	10.8014		BURSTSTART	2016-09-27 16:03:04	20123	30.1489	9515	3.42369	100	OK	24477	10.6893
BURSTSTART	2016-09-27 16:05:04	20123	30.1185	20490	7.63512	100	OK	24701	10.8018		BURSTSTART	2016-09-27 16:08:04	20115	30.1623	6962	2.4498	100	OK	24476	10.6889
BURSTSTART	2016-09-27 16:10:04	20118	30.1269	25150	9.41277	100	OK	24702	10.8023		BURSTSTART	2016-09-27 16:13:04	20112	30.1674	6571	2.30065	100	OK	24477	10.6893
BURSTSTART	2016-09-27 16:15:04	20117	30.1286	24779	9.27125	100	OK	24700	10.8014		BURSTSTART	2016-09-27 16:18:04	20108	30.1741	5094	1.73721	100	OK	24477	10.6893
BURSTSTART	2016-09-27 16:20:04	20119	30.1252	25639	9.59931	100	OK	24701	10.8018		BURSTSTART	2016-09-27 16:23:04	20094	30.1976	7448	2.63519	100	OK	24478	10.6897
BURSTSTART	2016-09-27 16:25:04	20122	30.1202	25077	9.38493	100	OK	24700	10.8014		BURSTSTART	2016-09-27 16:28:04	20085	30.2127	6935	2.4395	100	OK	24477	10.6893
BURSTSTART	2016-09-27 16:30:04	20127	30.1118	26124	9.78432	100	OK	24699	10.801		BURSTSTART	2016-09-27 16:33:04	20078	30.2244	4849	1.64375	100	OK	24477	10.6893
BURSTSTART	2016-09-27 16:35:04	20125	30.1151	29295	10.994	100	OK	24700	10.8014		BURSTSTART	2016-09-27 16:38:04	20081	30.2194	5414	1.85929	100	OK	24478	10.6897
BURSTSTART	2016-09-27 16:40:04	20130	30.1068	27496	10.3077	100	OK	24701	10.8018		BURSTSTART	2016-09-27 16:43:04	20082	30.2177	9149	3.28408	100	OK	24477	10.6893
BURSTSTART	2016-09-27 16:45:04	20127	30.1118	26979	10.1105	100	OK	24702	10.8023		BURSTSTART	2016-09-27 16:48:04	20077	30.2261	8498	3.03574	100	OK	24479	10.6902
BURSTSTART	2016-09-27 16:50:04	20122	30.1202	25583	9.57795	100	OK	24701	10.8018		BURSTSTART	2016-09-27 16:53:04	20078	30.2244	4261	1.41945	100	OK	24478	10.6897
BURSTSTART	2016-09-27 16:55:04	20130	30.1068	22091	8.24586	100	OK	24699	10.801		BURSTSTART	2016-09-27 16:58:04	20077	30.2261	3914	1.28708	100	OK	24479	10.6902
BURSTSTART	2016-09-27 17:00:04	20127	30.1118	21854	8.15545	100	OK	24700	10.8014		BURSTSTART	2016-09-27 17:03:04	20077	30.2261	5203	1.77879	100	OK	24477	10.6893
BURSTSTART	2016-09-27 17:05:04	20120	30.1235	18937	7.0427	100	OK	24700	10.8014		BURSTSTART	2016-09-27 17:08:04	20079	30.2228	4101	1.35841	100	OK	24482	10.6914
BURSTSTART	2016-09-27 17:10:04	20123	30.1185	20983	7.82319	100	OK	24699	10.801		BURSTSTART	2016-09-27 17:13:04	20080	30.2211	6846	2.40555	100	OK	24479	10.6902
BURSTSTART	2016-09-27 17:15:04	20122	30.1202	22136	8.26302	100	OK	24699	10.801		BURSTSTART	2016-09-27 17:18:04	20081	30.2194	9640	3.47138	100	OK	24480	10.6906
BURSTSTART	2016-09-27 17:20:04	20122	30.1202	22285	8.31986	100	OK	24699	10.801		BURSTSTART	2016-09-27 17:23:04	20079	30.2228	4452	1.49231	100	OK	24478	10.6897
BURSTSTART	2016-09-27 17:25:04	20124	30.1168	19466	7.2445	100	OK	24698	10.8006		BURSTSTART	2016-09-27 17:28:04	20085	30.2127	3029	0.949479	100	OK	24479	10.6902
BURSTSTART	2016-09-27 17:30:04	20122	30.1202	23644	8.83828	100	OK	24699	10.801		BURSTSTART	2016-09-27 17:33:04	20092	30.2009	3575	1.15776	100	OK	24478	10.6897
BURSTSTART	2016-09-27 17:35:04	20123	30.1185	23108	8.63381	100	OK	24698	10.8006		BURSTSTART	2016-09-27 17:38:04	20099	30.1892	3479	1.12114	100	OK	24477	10.6893
BURSTSTART	2016-09-27 17:40:04	20120	30.1235	20521	7.64695	100	OK	24700	10.8014		BURSTSTART	2016-09-27 17:43:04	20107	30.1758	4737	1.60103	100	OK	24477	10.6893
BURSTSTART	2016-09-27 17:45:04	20127	30.1118	22876	8.54531	100	OK	24699	10.801		BURSTSTART	2016-09-27 17:48:04	20112	30.1674	3550	1.14823	100	OK	24480	10.6906
BURSTSTART	2016-09-27 17:50:04	20124	30.1168	21382	7.97539	100	OK	24699	10.801		BURSTSTART	2016-09-27 17:53:04	20117	30.159	8933	3.20168	100	OK	24477	10.6893
BURSTSTART	2016-09-27 17:55:04	20125	30.1151	21503	8.02155	100	OK	24700	10.8014		BURSTSTART	2016-09-27 17:58:04	20132	30.1338	3296	1.05133	100	OK	24487	10.6935
BURSTSTART	2016-09-27 18:00:04	20128	30.1101	20750	7.7343	100	OK	24699	10.801		BURSTSTART	2016-09-27 18:03:04	20137	30.1254	3806	1.24588	100	OK	24483	10.6918
BURSTSTART	2016-09-27 18:05:04	20123	30.1185	23609	8.82493	100	OK	24695	10.7993		BURSTSTART	2016-09-27 18:08:04	20139	30.1221	4553	1.53084	100	OK	24485	10.6927
BURSTSTART	2016-09-27 18:10:04	20120	30.1235	23328	8.71773	100	OK	24700	10.8014		BURSTSTART	2016-09-27 18:13:04	20146	30.1104	4987	1.6964	100	OK	24483	10.6918
BURSTSTART	2016-09-27 18:15:04	20114	30.1336	23860	8.92068	100	OK	24700	10.8014		BURSTSTART	2016-09-27 18:18:04	20149	30.1053	4484	1.50452	100	OK	24482	10.6914
BURSTSTART	2016-09-27 18:20:04	20115	30.1319	24689	9.23691	100	OK	24699	10.801		BURSTSTART	2016-09-27 18:23:04	20153	30.0986	5110	1.74332	100	OK	24481	10.691
BURSTSTART	2016-09-27 18:25:04	20116	30.1303	24816	9.28536	100	OK	24701	10.8018		BURSTSTART	2016-09-27 18:28:04	20160	30.0869	2884	0.894166	100	OK	24484	10.6923
BURSTSTART	2016-09-27 18:30:04	20111	30.1387	24123	9.021	100	OK	24701	10.8018		BURSTSTART	2016-09-27 18:33:04	20162	30.0836	5407	1.85661	100	OK	24484	10.6923
BURSTSTART	2016-09-27 18:35:04	20108	30.1437	24867	9.30482	100	OK	24701	10.8018		BURSTSTART	2016-09-27 18:38:04	20168	30.0735	3843	1.25999	100	OK	24484	10.6923
BURSTSTART	2016-09-27 18:40:04	20104	30.1504	22455	8.38471	100	OK	24699	10.801		BURSTSTART	2016-09-27 18:43:04	20170	30.0702	5654	1.95084	100	OK	24483	10.6918
BURSTSTART	2016-09-27 18:45:04	20104	30.1504	25129	9.40476	100	OK	24699	10.801		BURSTSTART	2016-09-27 18:48:04	20175	30.0618	3309	1.05629	100	OK	24483	10.6918
BURSTSTART	2016-09-27 18:50:04	20100	30.1571	25343	9.4864	100	OK	24700	10.8014		BURSTSTART	2016-09-27 18:53:04	20177	30.0584	3499	1.12877	100	OK	24483	10.6918
BURSTSTART	2016-09-27 18:55:04	20101	30.1554	24570	9.19152	100	OK	24698	10.8006		BURSTSTART	2016-09-27 18:58:04	20177	30.0584	6792	2.38495	100	OK	24484	10.6923
BURSTSTART	2016-09-27 19:00:04	20099	30.1588	24816	9.28536	100	OK	24701	10.8018		BURSTSTART	2016-09-27 19:03:04	20183	30.0484	4146	1.37558	100	OK	24484	10.6923
BURSTSTART	2016-09-27 19:05:04	20093	30.1689	27904	10.4633	100	OK	24699	10.801		BURSTSTART	2016-09-27 19:08:04	20187	30.0417	5755	1.98937	100	OK	24488	10.6939
BURSTSTART	2016-09-27 19:10:04	20091	30.1723	26113	9.78013	100	OK	24701	10.8018		BURSTSTART	2016-09-27 19:13:04	20191	30.035	3243	1.03111	100	OK	24485	10.6927
BURSTSTART	2016-09-27 19:15:04	20091	30.1723	26838	10.0567	100	OK	24700	10.8014		BURSTSTART	2016-09-27 19:18:04	20193	30.0317	4954	1.68381	100	OK	24484	10.6923
BURSTSTART	2016-09-27 19:20:04	20085	30.1823	25168	9.41964	100	OK	24700	10.8014		BURSTSTART	2016-09-27 19:23:04	20189	30.0384	3765	1.23024	100	OK	24483	10.6918
BURSTSTART	2016-09-27 19:25:04	20087	30.179	28734	10.78	100	OK	24701	10.8018		BURSTSTART	2016-09-27 19:28:04	20195	30.0283	4057	1.34163	100	OK	24483	10.6918
BURSTSTART	2016-09-27 19:30:04	20091	30.1723	26812	10.0468	100	OK	24702	10.8023		BURSTSTART	2016-09-27 19:33:04	20196	30.0266	4209	1.39961	100	OK	24483	10.6918
BURSTSTART	2016-09-27 19:35:04	20090	30.1739	29347	11.0138	100	OK	24701	10.8018		BURSTSTART	2016-09-27 19:38:04	20198	30.0233	4875	1.65367	100	OK	24484	10.6923
BURSTSTART	2016-09-27 19:40:04	20089	30.1756	27906	10.4641	100	OK	24701	10.8018		BURSTSTART	2016-09-27 19:43:04	20198	30.0233	6991	2.46086	100	OK	24486	10.6931
BURSTSTART	2016-09-27 19:45:04	20090	30.1739	30241	11.3548	100	OK	24701	10.8018		BURSTSTART	2016-09-27 19:48:04	20204	30.0133	2923	0.909043	100	OK	24487	10.6935
BURSTSTART	2016-09-27 19:50:04	20090	30.1739	28086	10.5328	100	OK	24702	10.8023		BURSTSTART	2016-09-27 19:53:04	20209	30.0049	3771	1.23253	100	OK	24485	10.6927
BURSTSTART	2016-09-27 19:55:04	20090	30.1739	26559	9.95026	100	OK	24701	10.8018		BURSTSTART	2016-09-27 19:58:04	20213	29.9982	17871	6.61126	100	OK	24484	10.6923
BURSTSTART	2016-09-27 20:00:04	20091	30.1723	26920	10.088	100	OK	24702	10.8023		BURSTSTART	2016-09-27 20:03:04	20213	29.9982	5043	1.71776	100	OK	24483	10.6918
BURSTSTART	2016-09-27 20:05:04	20095	30.1655	27049	10.1372	100	OK	24700	10.8014		BURSTSTART	2016-09-27 20:08:04	20225	29.9782	3611	1.17149	100	OK	24486	10.6931
BURSTSTART	2016-09-27 20:10:04	20094	30.1672	29000	10.8814	100	OK	24701	10.8018		BURSTSTART	2016-09-27 20:13:04	20226	29.9765	4231	1.40801	100	OK	24490	10.6948
BURSTSTART	2016-09-27 20:15:04	20095	30.1655	30365	11.4021	100	OK	24699	10.801		BURSTSTART	2016-09-27 20:18:04	20224	29.9798	4585	1.54305	100	OK	24489	10.6944
BURSTSTART	2016-09-27 20:20:04	20096	30.1638	30606	11.4941	100	OK	24703	10.8027		BURSTSTART	2016-09-27 20:23:04	20224	29.9798	4157	1.37978	100	OK	24488	10.6939
BURSTSTART	2016-09-27 20:25:04	20096	30.1638	28993	10.8788	100	OK	24701	10.8018		BURSTSTART	2016-09-27 20:28:04	20224	29.9798	4025	1.32942	100	OK	24490	10.6948
BURSTSTART	2016-09-27 20:30:04	20098	30.1605	26619	9.97315	100	OK	24701	10.8018		BURSTSTART	2016-09-27 20:33:04	20225	29.9782	3113	0.981522	100	OK	24492	10.6956
BURSTSTART	2016-09-27 20:35:04	20101	30.1554	30289	11.3731	100	OK	24702	10.8023		BURSTSTART	2016-09-27 20:38:04	20224	29.9798	4217	1.40267	100	OK	24491	10.6952
BURSTSTART	2016-09-27 20:40:04	20101	30.1554	28665	10.7536	100	OK	24699	10.801		BURSTSTART	2016-09-27 20:43:04	20223	29.9815	3728	1.21613	100	OK	24491	10.6952
BURSTSTART	2016-09-27 20:45:04	20103	30.1521	32477	12.2078	100	OK	24700	10.8014		BURSTSTART	2016-09-27 20:48:04	20229	29.9715	3406	1.09329	100	OK	24493	10.696
BURSTSTART	2016-09-27 20:50:04	20102	30.1538	31245	11.7378	100	OK	24701	10.8018		BURSTSTART	2016-09-27 20:53:04	20227	29.9748	3412	1.09558	100	OK	24491	10.6952
BURSTSTART	2016-09-27 20:55:04	20104	30.1504	30101	11.3014	100	OK	24700	10.8014		BURSTSTART	2016-09-27 20:58:04	20224	29.9798	3343	1.06926	100	OK	24488	10.6939
BURSTSTART	2016-09-27 21:00:04	20104	30.1504	29313	11.0008	100	OK	24700	10.8014		BURSTSTART	2016-09-27 21:03:04	20227	29.9748	3370	1.07956	100	OK	24489	10.6944
BURSTSTART	2016-09-27 21:05:04	20107	30.1454	34443	12.9578	100	OK	24700	10.8014		BURSTSTART	2016-09-27 21:08:04	20225	29.9782	3385	1.08528	100	OK	24489	10.6944
BURSTSTART	2016-09-27 21:10:04	20108	30.1437	31735	11.9248	100	OK	24700	10.8014		BURSTSTART	2016-09-27 21:13:04	20226	29.9765	3731	1.21727	100	OK	24489	10.6944
BURSTSTART	2016-09-27 21:15:04	20109	30.142	32496	12.2151	100	OK	24700	10.8014		BURSTSTART	2016-09-27 21:18:04	20225	29.9782	5353	1.83601	100	OK	24486	10.6931
BURSTSTART	2016-09-27 21:20:04	20113	30.1353	34738	13.0703	100	OK	24699	10.801		BURSTSTART	2016-09-27 21:23:04	20224	29.9798	4539	1.5255	100	OK	24487	10.6935
BURSTSTART	2016-09-27 21:25:04	20109	30.142	34963	13.1561	100	OK	24701	10.8018		BURSTSTART	2016-09-27 21:28:04	20220	29.9865	3249	1.0334	100	OK	24482	10.6914
BURSTSTART	2016-09-27 21:30:04	20110	30.1403	35718	13.4441	100	OK	24699	10.801		BURSTSTART	2016-09-27 21:33:04	20220	29.9865	3360	1.07574	100	OK	24490	10.6948
BURSTSTART	2016-09-27 21:35:04	20113	30.1353	32789	12.3268	100	OK	24700	10.8014		BURSTSTART	2016-09-27 21:38:04	20221	29.9848	3560	1.15204	100	OK	24489	10.6944
BURSTSTART	2016-09-27 21:40:04	20117	30.1286	31339	11.7737	100	OK	24700	10.8014		BURSTSTART	2016-09-27 21:43:04	20220	29.9865	3842	1.25961	100	OK	24490	10.6948
BURSTSTART	2016-09-27 21:45:04	20120	30.1235	37900	14.2765	100	OK	24701	10.8018		BURSTSTART	2016-09-27 21:48:04	20219	29.9882	4010	1.3237	100	OK	24484	10.6923
BURSTSTART	2016-09-27 21:50:04	20119	30.1252	35867	13.501	100	OK	24700	10.8014		BURSTSTART	2016-09-27 21:53:04	20216	29.9932	3680	1.19782	100	OK	24490	10.6948
BURSTSTART	2016-09-27 21:55:04	20121	30.1219	38937	14.6721	100	OK	24698	10.8006		BURSTSTART	2016-09-27 21:58:04	20216	29.9932	3957	1.30348	100	OK	24483	10.6918
BURSTSTART	2016-09-27 22:00:04	20120	30.1235	35840	13.4907	100	OK	24699	10.801		BURSTSTART	2016-09-27 22:03:04	20211	30.0016	3072	0.965882	100	OK	24485	10.6927
BURSTSTART	2016-09-27 22:05:04	20120	30.1235	36833	13.8695	100	OK	24698	10.8006		BURSTSTART	2016-09-27 22:08:04	20212	29.9999	3460	1.11389	100	OK	24483	10.6918
BURSTSTART	2016-09-27 22:10:04	20120	30.1235	33777	12.7037	100	OK	24698	10.8006		BURSTSTART	2016-09-27 22:13:04	20211	30.0016	4726	1.59683	100	OK	24485	10.6927
BURSTSTART	2016-09-27 22:15:04	20120	30.1235	33802	12.7133	100	OK	24699	10.801		BURSTSTART	2016-09-27 22:18:04	20210	30.0032	3541	1.14479	100	OK	24487	10.6935
BURSTSTART	2016-09-27 22:20:04	20118	30.1269	36032	13.5639	100	OK	24701	10.8018		BURSTSTART	2016-09-27 22:23:04	20209	30.0049	4016	1.32599	100	OK	24482	10.6914
BURSTSTART	2016-09-27 22:25:04	20118	30.1269	34798	13.0932	100	OK	24702	10.8023		BURSTSTART	2016-09-27 22:28:04	20212	29.9999	3006	0.940705	100	OK	24482	10.6914
BURSTSTART	2016-09-27 22:30:04	20118	30.1269	39349	14.8293	100	OK	24699	10.801		BURSTSTART	2016-09-27 22:33:04	20213	29.9982	3304	1.05438	100	OK	24483	10.6918
BURSTSTART	2016-09-27 22:35:04	20118	30.1269	35773	13.4651	100	OK	24699	10.801		BURSTSTART	2016-09-27 22:38:04	20213	29.9982	3462	1.11465	100	OK	24482	10.6914
BURSTSTART	2016-09-27 22:40:04	20117	30.1286	37491	14.1205	100	OK	24700	10.8014		BURSTSTART	2016-09-27 22:43:04	20213	29.9982	3338	1.06735	100	OK	24487	10.6935
BURSTSTART	2016-09-27 22:45:04	20116	30.1303	37796	14.2368	100	OK	24700	10.8014		BURSTSTART	2016-09-27 22:48:04	20213	29.9982	3985	1.31416	100	OK	24487	10.6935
BURSTSTART	2016-09-27 22:50:04	20117	30.1286	32320	12.1479	100	OK	24700	10.8014		BURSTSTART	2016-09-27 22:53:04	20213	29.9982	3827	1.25389	100	OK	24488	10.6939
BURSTSTART	2016-09-27 22:55:04	20117	30.1286	36630	13.792	100	OK	24701	10.8018		BURSTSTART	2016-09-27 22:58:04	20212	29.9999	3714	1.21079	100	OK	24483	10.6918
BURSTSTART	2016-09-27 23:00:04	20120	30.1235	36110	13.5937	100	OK	24701	10.8018		BURSTSTART	2016-09-27 23:03:04	20211	30.0016	4289	1.43013	100	OK	24482	10.6914
BURSTSTART	2016-09-27 23:05:04	20118	30.1269	32198	12.1014	100	OK	24700	10.8014		BURSTSTART	2016-09-27 23:08:04	20210	30.0032	3588	1.16272	100	OK	24486	10.6931
BURSTSTART	2016-09-27 23:10:04	20118	30.1269	40418	15.2371	100	OK	24698	10.8006		BURSTSTART	2016-09-27 23:13:04	20212	29.9999	3369	1.07918	100	OK	24486	10.6931
BURSTSTART	2016-09-27 23:15:04	20119	30.1252	39966	15.0646	100	OK	24700	10.8014		BURSTSTART	2016-09-27 23:18:04	20214	29.9965	4498	1.50986	100	OK	24487	10.6935
BURSTSTART	2016-09-27 23:20:04	20118	30.1269	40841	15.3984	100	OK	24699	10.801		BURSTSTART	2016-09-27 23:23:04	20214	29.9965	3682	1.19858	100	OK	24484	10.6923
BURSTSTART	2016-09-27 23:25:04	20118	30.1269	36348	13.6845	100	OK	24699	10.801		BURSTSTART	2016-09-27 23:28:04	20218	29.9899	3197	1.01357	100	OK	24491	10.6952
BURSTSTART	2016-09-27 23:30:04	20119	30.1252	34842	13.11	100	OK	24699	10.801		BURSTSTART	2016-09-27 23:33:04	20219	29.9882	4008	1.32294	100	OK	24490	10.6948
BURSTSTART	2016-09-27 23:35:04	20119	30.1252	11171	20.3743	20	OK	24689	10.7968		BURSTSTART	2016-09-27 23:38:04	20225	29.9782	3806	1.24588	100	OK	24484	10.6923
BURSTSTART	2016-09-27 23:40:04	20122	30.1202	37344	14.0644	100	OK	24697	10.8002		BURSTSTART	2016-09-27 23:43:04	20224	29.9798	4078	1.34964	100	OK	24488	10.6939
BURSTSTART	2016-09-27 23:45:04	20121	30.1219	47751	18.0344	100	OK	24696	10.7997		BURSTSTART	2016-09-27 23:48:04	20228	29.9731	4674	1.577	100	OK	24485	10.6927
BURSTSTART	2016-09-27 23:50:04	20122	30.1202	41769	15.7524	100	OK	24699	10.801		BURSTSTART	2016-09-27 23:53:04	20232	29.9665	4943	1.67961	100	OK	24491	10.6952
BURSTSTART	2016-09-27 23:55:04	20125	30.1151	44667	16.8579	100	OK	24697	10.8002		BURSTSTART	2016-09-27 23:58:04	20232	29.9665	4192	1.39313	100	OK	24489	10.6944
BURSTSTART	2016-09-28 00:00:04	20124	30.1168	34161	12.8502	100	OK	24691	10.7976		BURSTSTART	2016-09-28 00:03:04	20235	29.9614	2986	0.933076	100	OK	24489	10.6944
BURSTSTART	2016-09-28 00:05:04	20125	30.1151	45058	17.0071	100	OK	24696	10.7997		BURSTSTART	2016-09-28 00:08:04	20236	29.9598	3354	1.07346	100	OK	24491	10.6952
BURSTSTART	2016-09-28 00:10:04	20128	30.1101	38628	14.5542	100	OK	24700	10.8014		BURSTSTART	2016-09-28 00:13:04	20234	29.9631	3708	1.2085	100	OK	24488	10.6939
BURSTSTART	2016-09-28 00:15:04	20128	30.1101	43035	16.2354	100	OK	24699	10.801		BURSTSTART	2016-09-28 00:18:04	20234	29.9631	2956	0.921631	100	OK	24492	10.6956
BURSTSTART	2016-09-28 00:20:04	20129	30.1084	48115	18.1732	100	OK	24698	10.8006		BURSTSTART	2016-09-28 00:23:04	20235	29.9614	3026	0.948334	100	OK	24490	10.6948
BURSTSTART	2016-09-28 00:25:04	20129	30.1084	39304	14.8121	100	OK	24699	10.801		BURSTSTART	2016-09-28 00:28:04	20235	29.9614	3272	1.04218	100	OK	24489	10.6944
BURSTSTART	2016-09-28 00:30:04	20133	30.1017	45008	16.988	100	OK	24695	10.7993		BURSTSTART	2016-09-28 00:33:04	20235	29.9614	4046	1.33743	100	OK	24492	10.6956
BURSTSTART	2016-09-28 00:35:04	20132	30.1034	44877	16.938	100	OK	24696	10.7997		BURSTSTART	2016-09-28 00:38:04	20237	29.9581	3673	1.19514	100	OK	24493	10.696
BURSTSTART	2016-09-28 00:40:04	20132	30.1034	46484	17.5511	100	OK	24695	10.7993		BURSTSTART	2016-09-28 00:43:04	20236	29.9598	3655	1.18828	100	OK	24488	10.6939
BURSTSTART	2016-09-28 00:45:04	20132	30.1034	37905	14.2784	100	OK	24698	10.8006		BURSTSTART	2016-09-28 00:48:04	20238	29.9564	3219	1.02196	100	OK	24490	10.6948
BURSTSTART	2016-09-28 00:50:04	20132	30.1034	43340	16.3517	100	OK	24698	10.8006		BURSTSTART	2016-09-28 00:53:04	20241	29.9514	3642	1.18332	100	OK	24489	10.6944
BURSTSTART	2016-09-28 00:55:04	20132	30.1034	38875	14.6484	100	OK	24693	10.7985		BURSTSTART	2016-09-28 00:58:04	20242	29.9497	3145	0.993729	100	OK	24492	10.6956
BURSTSTART	2016-09-28 01:00:04	20135	30.0984	13752	25.2972	20	OK	24690	10.7972		BURSTSTART	2016-09-28 01:03:04	20243	29.9481	2956	0.921631	100	OK	24490	10.6948
BURSTSTART	2016-09-28 01:05:04	20134	30.1	44474	16.7843	100	OK	24698	10.8006		BURSTSTART	2016-09-28 01:08:04	20248	29.9397	3904	1.28327	100	OK	24492	10.6956
BURSTSTART	2016-09-28 01:10:04	20130	30.1068	39887	15.0345	100	OK	24697	10.8002		BURSTSTART	2016-09-28 01:13:04	20247	29.9414	3228	1.02539	100	OK	24496	10.6973
BURSTSTART	2016-09-28 01:15:04	20136	30.0967	38718	14.5886	100	OK	24698	10.8006		BURSTSTART	2016-09-28 01:18:04	20248	29.9397	2555	0.768662	100	OK	24493	10.696
BURSTSTART	2016-09-28 01:20:04	20139	30.0916	39943	15.0559	100	OK	24696	10.7997		BURSTSTART	2016-09-28 01:23:04	20251	29.9347	2800	0.862122	100	OK	24492	10.6956
BURSTSTART	2016-09-28 01:25:04	20135	30.0984	33752	12.6942	100	OK	24699	10.801		BURSTSTART	2016-09-28 01:28:04	20252	29.933	2866	0.887299	100	OK	24495	10.6969
BURSTSTART	2016-09-28 01:30:04	20135	30.0984	44223	16.6885	100	OK	24698	10.8006		BURSTSTART	2016-09-28 01:33:04	20253	29.9314	2904	0.901795	100	OK	24491	10.6952
BURSTSTART	2016-09-28 01:35:04	20135	30.0984	49211	18.5913	100	OK	24697	10.8002		BURSTSTART	2016-09-28 01:38:04	20252	29.933	4007	1.32256	100	OK	24494	10.6964
BURSTSTART	2016-09-28 01:40:04	20140	30.09	10427	18.9552	20	OK	24687	10.796		BURSTSTART	2016-09-28 01:43:04	20254	29.9297	2592	0.782776	100	OK	24487	10.6935
BURSTSTART	2016-09-28 01:45:04	20139	30.0916	55549	21.0091	100	OK	24695	10.7993		BURSTSTART	2016-09-28 01:48:04	20254	29.9297	3004	0.939942	100	OK	24495	10.6969
BURSTSTART	2016-09-28 01:50:04	20139	30.0916	52412	19.8124	100	OK	24695	10.7993		BURSTSTART	2016-09-28 01:53:04	20253	29.9314	2811	0.866318	100	OK	24493	10.696
BURSTSTART	2016-09-28 01:55:04	20139	30.0916	64533	24.4362	100	SAT	24689	10.7968		BURSTSTART	2016-09-28 01:58:04	20255	29.928	2867	0.887681	100	OK	24495	10.6969
BURSTSTART	2016-09-28 02:00:04	20137	30.095	12675	23.243	20	OK	24687	10.796		BURSTSTART	2016-09-28 02:03:04	20256	29.9264	3116	0.982667	100	OK	24493	10.696
BURSTSTART	2016-09-28 02:05:04	20142	30.0866	14169	26.0925	20	OK	24688	10.7964		BURSTSTART	2016-09-28 02:08:04	20257	29.9247	3065	0.963212	100	OK	24495	10.6969
BURSTSTART	2016-09-28 02:10:04	20142	30.0866	58113	21.9872	100	OK	24693	10.7985		BURSTSTART	2016-09-28 02:13:04	20259	29.9214	2612	0.790406	100	OK	24490	10.6948
BURSTSTART	2016-09-28 02:15:04	20141	30.0883	11200	20.4296	20	OK	24688	10.7964		BURSTSTART	2016-09-28 02:18:04	20262	29.9163	2944	0.917054	100	OK	24492	10.6956
BURSTSTART	2016-09-28 02:20:04	20141	30.0883	43938	16.5798	100	OK	24697	10.8002		BURSTSTART	2016-09-28 02:23:04	20261	29.918	2900	0.900269	100	OK	24496	10.6973
BURSTSTART	2016-09-28 02:25:04	20139	30.0916	60964	23.0747	100	OK	24696	10.7997		BURSTSTART	2016-09-28 02:28:04	20262	29.9163	3454	1.1116	100	OK	24491	10.6952
BURSTSTART	2016-09-28 02:30:04	20144	30.0833	38652	14.5634	100	OK	24696	10.7997		BURSTSTART	2016-09-28 02:33:04	20261	29.918	2788	0.857545	100	OK	24495	10.6969
BURSTSTART	2016-09-28 02:35:04	20145	30.0816	11196	20.422	20	OK	24688	10.7964		BURSTSTART	2016-09-28 02:38:04	20262	29.9163	17386	6.42624	100	OK	24491	10.6952
BURSTSTART	2016-09-28 02:40:04	20145	30.0816	14916	27.5173	20	OK	24687	10.796		BURSTSTART	2016-09-28 02:43:04	20264	29.913	3006	0.940705	100	OK	24494	10.6964
BURSTSTART	2016-09-28 02:45:04	20145	30.0816	14296	26.3348	20	OK	24688	10.7964		BURSTSTART	2016-09-28 02:48:04	20265	29.9113	3528	1.13983	100	OK	24492	10.6956
BURSTSTART	2016-09-28 02:50:04	20147	30.0782	62651	23.7183	100	OK	24695	10.7993		BURSTSTART	2016-09-28 02:53:04	20268	29.9063	3064	0.96283	100	OK	24491	10.6952
BURSTSTART	2016-09-28 02:55:04	20147	30.0782	12304	22.5353	20	OK	24686	10.7955		BURSTSTART	2016-09-28 02:58:04	20274	29.8963	2701	0.824357	100	OK	24492	10.6956
BURSTSTART	2016-09-28 03:00:04	20146	30.0799	33791	12.7091	100	OK	24696	10.7997		BURSTSTART	2016-09-28 03:03:04	20274	29.8963	3071	0.965501	100	OK	24493	10.696
BURSTSTART	2016-09-28 03:05:04	20144	30.0833	35822	13.4838	100	OK	24693	10.7985		BURSTSTART	2016-09-28 03:08:04	20273	29.898	2289	0.667191	100	OK	24495	10.6969
BURSTSTART	2016-09-28 03:10:04	20145	30.0816	42326	15.9649	100	OK	24693	10.7985		BURSTSTART	2016-09-28 03:13:04	20274	29.8963	2731	0.835801	100	OK	24493	10.696
BURSTSTART	2016-09-28 03:15:04	20145	30.0816	50183	18.9621	100	OK	24693	10.7985		BURSTSTART	2016-09-28 03:18:04	20273	29.898	3029	0.949479	100	OK	24498	10.6981
BURSTSTART	2016-09-28 03:20:04	20148	30.0766	48206	18.2079	100	OK	24696	10.7997		BURSTSTART	2016-09-28 03:23:04	20274	29.8963	2837	0.876237	100	OK	24500	10.699
BURSTSTART	2016-09-28 03:25:04	20145	30.0816	48176	18.1965	100	OK	24694	10.7989		BURSTSTART	2016-09-28 03:28:04	20271	29.9013	2775	0.852585	100	OK	24493	10.696
BURSTSTART	2016-09-28 03:30:04	20144	30.0833	49622	18.7481	100	OK	24694	10.7989		BURSTSTART	2016-09-28 03:33:04	20270	29.903	2882	0.893403	100	OK	24494	10.6964
BURSTSTART	2016-09-28 03:35:04	20147	30.0782	11196	20.422	20	OK	24687	10.796		BURSTSTART	2016-09-28 03:38:04	20268	29.9063	2844	0.878907	100	OK	24492	10.6956
BURSTSTART	2016-09-28 03:40:04	20148	30.0766	34773	13.0837	100	OK	24696	10.7997		BURSTSTART	2016-09-28 03:43:04	20265	29.9113	2458	0.731659	100	OK	24490	10.6948
BURSTSTART	2016-09-28 03:45:04	20146	30.0799	12238	22.4095	20	OK	24686	10.7955		BURSTSTART	2016-09-28 03:48:04	20264	29.913	3035	0.951768	100	OK	24494	10.6964
BURSTSTART	2016-09-28 03:50:04	20147	30.0782	53028	20.0474	100	OK	24693	10.7985		BURSTSTART	2016-09-28 03:53:04	20264	29.913	4572	1.53809	100	OK	24490	10.6948
BURSTSTART	2016-09-28 03:55:04	20149	30.0749	41458	15.6338	100	OK	24695	10.7993		BURSTSTART	2016-09-28 03:58:04	20261	29.918	2616	0.791932	100	OK	24494	10.6964
BURSTSTART	2016-09-28 04:00:04	20144	30.0833	41997	15.8394	100	OK	24694	10.7989		BURSTSTART	2016-09-28 04:03:04	20260	29.9197	3713	1.2104	100	OK	24492	10.6956
BURSTSTART	2016-09-28 04:05:04	20149	30.0749	30667	11.5173	100	OK	24696	10.7997		BURSTSTART	2016-09-28 04:08:04	20260	29.9197	2783	0.855637	100	OK	24495	10.6969
BURSTSTART	2016-09-28 04:10:04	20148	30.0766	34624	13.0268	100	OK	24693	10.7985		BURSTSTART	2016-09-28 04:13:04	20259	29.9214	3319	1.06011	100	OK	24492	10.6956
BURSTSTART	2016-09-28 04:15:04	20149	30.0749	47193	17.8215	100	OK	24692	10.7981		BURSTSTART	2016-09-28 04:18:04	20260	29.9197	2807	0.864792	100	OK	24492	10.6956
BURSTSTART	2016-09-28 04:20:04	20148	30.0766	41010	15.4629	100	OK	24693	10.7985		BURSTSTART	2016-09-28 04:23:04	20259	29.9214	2975	0.928879	100	OK	24493	10.696
BURSTSTART	2016-09-28 04:25:04	20148	30.0766	32755	12.3139	100	OK	24694	10.7989		BURSTSTART	2016-09-28 04:28:04	20259	29.9214	3282	1.04599	100	OK	24494	10.6964
BURSTSTART	2016-09-28 04:30:04	20151	30.0715	39948	15.0578	100	OK	24696	10.7997		BURSTSTART	2016-09-28 04:33:04	20257	29.9247	3171	1.00365	100	OK	24490	10.6948
BURSTSTART	2016-09-28 04:35:04	20154	30.0665	7724	13.7997	20	OK	24686	10.7955		BURSTSTART	2016-09-28 04:38:04	20255	29.928	3267	1.04027	100	OK	24491	10.6952
BURSTSTART	2016-09-28 04:40:04	20153	30.0682	6960	12.3425	20	OK	24686	10.7955		BURSTSTART	2016-09-28 04:43:04	20255	29.928	3461	1.11427	100	OK	24490	10.6948
BURSTSTART	2016-09-28 04:45:04	20149	30.0749	14840	5.47982	100	OK	24695	10.7993		BURSTSTART	2016-09-28 04:48:04	20255	29.928	3126	0.986481	100	OK	24493	10.696
BURSTSTART	2016-09-28 04:50:04	20143	30.0849	18162	6.74706	100	OK	24698	10.8006		BURSTSTART	2016-09-28 04:53:04	20255	29.928	4840	1.64032	100	OK	24493	10.696
BURSTSTART	2016-09-28 04:55:04	20141	30.0883	20045	7.46537	100	OK	24695	10.7993		BURSTSTART	2016-09-28 04:58:04	20252	29.933	5176	1.76849	100	OK	24493	10.696
BURSTSTART	2016-09-28 05:00:04	20141	30.0883	19050	7.0858	100	OK	24697	10.8002		BURSTSTART	2016-09-28 05:03:04	20254	29.9297	3439	1.10588	100	OK	24493	10.696
BURSTSTART	2016-09-28 05:05:04	20138	30.0933	18353	6.81992	100	OK	24697	10.8002		BURSTSTART	2016-09-28 05:08:04	20252	29.933	2944	0.917054	100	OK	24492	10.6956
BURSTSTART	2016-09-28 05:10:04	20132	30.1034	18579	6.90613	100	OK	24698	10.8006		BURSTSTART	2016-09-28 05:13:04	20253	29.9314	3270	1.04141	100	OK	24488	10.6939
BURSTSTART	2016-09-28 05:15:04	20133	30.1017	16042	5.93834	100	OK	24699	10.801		BURSTSTART	2016-09-28 05:18:04	20255	29.928	2924	0.909424	100	OK	24491	10.6952
BURSTSTART	2016-09-28 05:20:04	20132	30.1034	17498	6.49376	100	OK	24698	10.8006		BURSTSTART	2016-09-28 05:23:04	20255	29.928	3430	1.10245	100	OK	24491	10.6952
BURSTSTART	2016-09-28 05:25:04	20133	30.1017	15421	5.70145	100	OK	24698	10.8006		BURSTSTART	2016-09-28 05:28:04	20256	29.9264	3117	0.983048	100	OK	24492	10.6956
BURSTSTART	2016-09-28 05:30:04	20135	30.0984	17003	6.30494	100	OK	24698	10.8006		BURSTSTART	2016-09-28 05:33:04	20258	29.923	3034	0.951386	100	OK	24493	10.696
BURSTSTART	2016-09-28 05:35:04	20135	30.0984	17566	6.5197	100	OK	24696	10.7997		BURSTSTART	2016-09-28 05:38:04	20259	29.9214	5161	1.76277	100	OK	24490	10.6948
BURSTSTART	2016-09-28 05:40:04	20133	30.1017	17145	6.3591	100	OK	24694	10.7989		BURSTSTART	2016-09-28 05:43:04	20261	29.918	3114	0.981904	100	OK	24491	10.6952
BURSTSTART	2016-09-28 05:45:04	20135	30.0984	13793	5.08042	100	OK	24698	10.8006		BURSTSTART	2016-09-28 05:48:04	20264	29.913	2806	0.864411	100	OK	24492	10.6956
BURSTSTART	2016-09-28 05:50:04	20137	30.095	17587	6.52771	100	OK	24699	10.801		BURSTSTART	2016-09-28 05:53:04	20266	29.9097	3131	0.988389	100	OK	24491	10.6952
BURSTSTART	2016-09-28 05:55:04	20134	30.1	19083	7.09839	100	OK	24697	10.8002		BURSTSTART	2016-09-28 05:58:04	20265	29.9113	4051	1.33934	100	OK	24490	10.6948
BURSTSTART	2016-09-28 06:00:04	20135	30.0984	23569	8.80967	100	OK	24698	10.8006		BURSTSTART	2016-09-28 06:03:04	20266	29.9097	3204	1.01624	100	OK	24491	10.6952
BURSTSTART	2016-09-28 06:05:04	20132	30.1034	27574	10.3375	100	OK	24699	10.801		BURSTSTART	2016-09-28 06:08:04	20268	29.9063	3166	1.00174	100	OK	24495	10.6969
BURSTSTART	2016-09-28 06:10:04	20132	30.1034	15030	5.5523	100	OK	24698	10.8006		BURSTSTART	2016-09-28 06:13:04	20274	29.8963	7179	2.53258	100	OK	24492	10.6956
BURSTSTART	2016-09-28 06:15:04	20132	30.1034	14304	5.27535	100	OK	24699	10.801		BURSTSTART	2016-09-28 06:18:04	20274	29.8963	3103	0.977708	100	OK	24493	10.696
BURSTSTART	2016-09-28 06:20:04	20133	30.1017	9297	3.36533	100	OK	24698	10.8006		BURSTSTART	2016-09-28 06:23:04	20275	29.8947	3341	1.0685	100	OK	24492	10.6956
BURSTSTART	2016-09-28 06:25:04	20129	30.1084	18148	6.74172	100	OK	24698	10.8006		BURSTSTART	2016-09-28 06:28:04	20285	29.878	3007	0.941086	100	OK	24495	10.6969
BURSTSTART	2016-09-28 06:30:04	20130	30.1068	20654	7.69768	100	OK	24698	10.8006		BURSTSTART	2016-09-28 06:33:04	20285	29.878	3014	0.943757	100	OK	24501	10.6994
BURSTSTART	2016-09-28 06:35:04	20128	30.1101	48204	18.2072	100	OK	24698	10.8006		BURSTSTART	2016-09-28 06:38:04	20284	29.8796	3263	1.03874	100	OK	24495	10.6969
BURSTSTART	2016-09-28 06:40:04	20129	30.1084	41580	15.6803	100	OK	24699	10.801		BURSTSTART	2016-09-28 06:43:04	20283	29.8813	2906	0.902558	100	OK	24492	10.6956
BURSTSTART	2016-09-28 06:45:04	20129	30.1084	23624	8.83065	100	OK	24699	10.801		BURSTSTART	2016-09-28 06:48:04	20291	29.868	3367	1.07842	100	OK	24495	10.6969
BURSTSTART	2016-09-28 06:50:04	20127	30.1118	15393	5.69077	100	OK	24699	10.801		BURSTSTART	2016-09-28 06:53:04	20290	29.8696	2985	0.932694	100	OK	24493	10.696
BURSTSTART	2016-09-28 06:55:04	20130	30.1068	28414	10.6579	100	OK	24698	10.8006		BURSTSTART	2016-09-28 06:58:04	20291	29.868	4086	1.35269	100	OK	24491	10.6952
BURSTSTART	2016-09-28 07:00:04	20128	30.1101	52309	19.7731	100	OK	24697	10.8002		BURSTSTART	2016-09-28 07:03:04	20294	29.863	3136	0.990296	100	OK	24494	10.6964
BURSTSTART	2016-09-28 07:05:04	20128	30.1101	13413	24.6506	20	OK	24692	10.7981		BURSTSTART	2016-09-28 07:08:04	20293	29.8646	3588	1.16272	100	OK	24499	10.6985
BURSTSTART	2016-09-28 07:10:04	20124	30.1168	61923	23.4406	100	OK	24698	10.8006		BURSTSTART	2016-09-28 07:13:04	20295	29.8613	6942	2.44217	100	OK	24496	10.6973
BURSTSTART	2016-09-28 07:15:04	20123	30.1185	47122	17.7944	100	OK	24695	10.7993		BURSTSTART	2016-09-28 07:18:04	20292	29.8663	3055	0.959397	100	OK	24494	10.6964
BURSTSTART	2016-09-28 07:20:04	20124	30.1168	13516	24.847	20	OK	24691	10.7976		BURSTSTART	2016-09-28 07:23:04	20292	29.8663	3203	1.01585	100	OK	24494	10.6964
BURSTSTART	2016-09-28 07:25:04	20119	30.1252	11102	20.2427	20	OK	24691	10.7976		BURSTSTART	2016-09-28 07:28:04	20289	29.8713	3210	1.01852	100	OK	24494	10.6964
BURSTSTART	2016-09-28 07:30:04	20119	30.1252	8867	15.9798	20	OK	24692	10.7981		BURSTSTART	2016-09-28 07:33:04	20291	29.868	3140	0.991822	100	OK	24495	10.6969
BURSTSTART	2016-09-28 07:35:04	20119	30.1252	46117	17.4111	100	OK	24698	10.8006		BURSTSTART	2016-09-28 07:38:04	20287	29.8746	4758	1.60904	100	OK	24493	10.696
BURSTSTART	2016-09-28 07:40:04	20118	30.1269	36764	13.8432	100	OK	24698	10.8006		BURSTSTART	2016-09-28 07:43:04	20288	29.873	2657	0.807572	100	OK	24496	10.6973
BURSTSTART	2016-09-28 07:45:04	20118	30.1269	12518	22.9435	20	OK	24689	10.7968		BURSTSTART	2016-09-28 07:48:04	20289	29.8713	4510	1.51444	100	OK	24497	10.6977
BURSTSTART	2016-09-28 07:50:04	20117	30.1286	53837	20.356	100	OK	24699	10.801		BURSTSTART	2016-09-28 07:53:04	20286	29.8763	2867	0.887681	100	OK	24494	10.6964
BURSTSTART	2016-09-28 07:55:04	20113	30.1353	35571	13.3881	100	OK	24699	10.801		BURSTSTART	2016-09-28 07:58:04	20286	29.8763	2718	0.830842	100	OK	24494	10.6964
BURSTSTART	2016-09-28 08:00:04	20116	30.1303	33809	12.7159	100	OK	24700	10.8014		BURSTSTART	2016-09-28 08:03:04	20285	29.878	3141	0.992203	100	OK	24495	10.6969
BURSTSTART	2016-09-28 08:05:04	20116	30.1303	47270	17.8509	100	OK	24699	10.801		BURSTSTART	2016-09-28 08:08:04	20286	29.8763	3241	1.03035	100	OK	24494	10.6964
BURSTSTART	2016-09-28 08:10:04	20114	30.1336	32847	12.3489	100	OK	24698	10.8006		BURSTSTART	2016-09-28 08:13:04	20288	29.873	4014	1.32523	100	OK	24492	10.6956
BURSTSTART	2016-09-28 08:15:04	20112	30.137	44818	16.9155	100	OK	24699	10.801		BURSTSTART	2016-09-28 08:18:04	20285	29.878	2810	0.865937	100	OK	24494	10.6964
BURSTSTART	2016-09-28 08:20:04	20112	30.137	32231	12.114	100	OK	24700	10.8014		BURSTSTART	2016-09-28 08:23:04	20283	29.8813	2850	0.881196	100	OK	24492	10.6956
BURSTSTART	2016-09-28 08:25:04	20110	30.1403	40089	15.1116	100	OK	24699	10.801		BURSTSTART	2016-09-28 08:28:04	20283	29.8813	3018	0.945283	100	OK	24490	10.6948
BURSTSTART	2016-09-28 08:30:04	20112	30.137	33743	12.6907	100	OK	24699	10.801		BURSTSTART	2016-09-28 08:33:04	20285	29.878	4328	1.44501	100	OK	24492	10.6956
BURSTSTART	2016-09-28 08:35:04	20112	30.137	41966	15.8276	100	OK	24699	10.801		BURSTSTART	2016-09-28 08:38:04	20278	29.8896	3120	0.984193	100	OK	24491	10.6952
BURSTSTART	2016-09-28 08:40:04	20110	30.1403	48703	18.3975	100	OK	24700	10.8014		BURSTSTART	2016-09-28 08:43:04	20279	29.888	3113	0.981522	100	OK	24492	10.6956
BURSTSTART	2016-09-28 08:45:04	20104	30.1504	36977	13.9244	100	OK	24701	10.8018		BURSTSTART	2016-09-28 08:48:04	20282	29.883	3435	1.10436	100	OK	24490	10.6948
BURSTSTART	2016-09-28 08:50:04	20107	30.1454	27409	10.2745	100	OK	24701	10.8018		BURSTSTART	2016-09-28 08:53:04	20284	29.8796	3191	1.01128	100	OK	24491	10.6952
BURSTSTART	2016-09-28 08:55:04	20106	30.147	40582	15.2996	100	OK	24700	10.8014		BURSTSTART	2016-09-28 08:58:04	20283	29.8813	3841	1.25923	100	OK	24492	10.6956
BURSTSTART	2016-09-28 09:00:04	20109	30.142	44878	16.9384	100	OK	24700	10.8014		BURSTSTART	2016-09-28 09:03:04	20279	29.888	3001	0.938798	100	OK	24490	10.6948
BURSTSTART	2016-09-28 09:05:04	20108	30.1437	34507	12.9822	100	OK	24700	10.8014		BURSTSTART	2016-09-28 09:08:04	20278	29.8896	3242	1.03073	100	OK	24491	10.6952
BURSTSTART	2016-09-28 09:10:04	20107	30.1454	29268	10.9837	100	OK	24700	10.8014		BURSTSTART	2016-09-28 09:13:04	20275	29.8947	2699	0.823594	100	OK	24493	10.696
BURSTSTART	2016-09-28 09:15:04	20103	30.1521	33319	12.529	100	OK	24702	10.8023		BURSTSTART	2016-09-28 09:18:04	20275	29.8947	3495	1.12724	100	OK	24492	10.6956
BURSTSTART	2016-09-28 09:20:04	20103	30.1521	33899	12.7503	100	OK	24700	10.8014		BURSTSTART	2016-09-28 09:23:04	20272	29.8997	3842	1.25961	100	OK	24493	10.696
BURSTSTART	2016-09-28 09:25:04	20104	30.1504	36284	13.6601	100	OK	24702	10.8023		BURSTSTART	2016-09-28 09:28:04	20273	29.898	3787	1.23863	100	OK	24489	10.6944
BURSTSTART	2016-09-28 09:30:04	20101	30.1554	29487	11.0672	100	OK	24700	10.8014		BURSTSTART	2016-09-28 09:33:04	20276	29.893	2544	0.764466	100	OK	24491	10.6952
BURSTSTART	2016-09-28 09:35:04	20105	30.1487	31839	11.9644	100	OK	24701	10.8018		BURSTSTART	2016-09-28 09:38:04	20269	29.9047	3563	1.15318	100	OK	24489	10.6944
BURSTSTART	2016-09-28 09:40:04	20105	30.1487	43935	16.5787	100	OK	24701	10.8018		BURSTSTART	2016-09-28 09:43:04	20271	29.9013	2527	0.757981	100	OK	24491	10.6952
BURSTSTART	2016-09-28 09:45:04	20107	30.1454	39893	15.0368	100	OK	24700	10.8014		BURSTSTART	2016-09-28 09:48:04	20263	29.9147	3749	1.22414	100	OK	24487	10.6935
BURSTSTART	2016-09-28 09:50:04	20105	30.1487	32123	12.0728	100	OK	24699	10.801		BURSTSTART	2016-09-28 09:53:04	20260	29.9197	2953	0.920487	100	OK	24489	10.6944
BURSTSTART	2016-09-28 09:55:04	20106	30.147	32805	12.3329	100	OK	24700	10.8014		BURSTSTART	2016-09-28 09:58:04	20256	29.9264	4005	1.32179	100	OK	24490	10.6948
BURSTSTART	2016-09-28 10:00:04	20104	30.1504	33277	12.513	100	OK	24701	10.8018		BURSTSTART	2016-09-28 10:03:04	20252	29.933	3371	1.07994	100	OK	24484	10.6923
BURSTSTART	2016-09-28 10:05:04	20101	30.1554	45602	17.2146	100	OK	24701	10.8018		BURSTSTART	2016-09-28 10:08:04	20247	29.9414	3484	1.12305	100	OK	24487	10.6935
BURSTSTART	2016-09-28 10:10:04	20101	30.1554	25179	9.42384	100	OK	24700	10.8014		BURSTSTART	2016-09-28 10:13:04	20253	29.9314	3357	1.0746	100	OK	24490	10.6948
BURSTSTART	2016-09-28 10:15:04	20107	30.1454	24112	9.01681	100	OK	24701	10.8018		BURSTSTART	2016-09-28 10:18:04	20251	29.9347	4646	1.56632	100	OK	24489	10.6944
BURSTSTART	2016-09-28 10:20:04	20096	30.1638	23519	8.79059	100	OK	24702	10.8023		BURSTSTART	2016-09-28 10:23:04	20249	29.9381	3193	1.01204	100	OK	24490	10.6948
BURSTSTART	2016-09-28 10:25:04	20095	30.1655	24479	9.15681	100	OK	24704	10.8031		BURSTSTART	2016-09-28 10:28:04	20242	29.9497	4337	1.44844	100	OK	24489	10.6944
BURSTSTART	2016-09-28 10:30:04	20095	30.1655	23519	8.79059	100	OK	24703	10.8027		BURSTSTART	2016-09-28 10:33:04	20234	29.9631	4394	1.47019	100	OK	24489	10.6944
BURSTSTART	2016-09-28 10:35:04	20087	30.179	26317	9.85795	100	OK	24701	10.8018		BURSTSTART	2016-09-28 10:38:04	20240	29.9531	4007	1.32256	100	OK	24484	10.6923
BURSTSTART	2016-09-28 10:40:04	20087	30.179	25917	9.70536	100	OK	24702	10.8023		BURSTSTART	2016-09-28 10:43:04	20232	29.9665	4288	1.42975	100	OK	24485	10.6927
BURSTSTART	2016-09-28 10:45:04	20081	30.1891	28700	10.767	100	OK	24703	10.8027		BURSTSTART	2016-09-28 10:48:04	20234	29.9631	4639	1.56364	100	OK	24486	10.6931
BURSTSTART	2016-09-28 10:50:04	20086	30.1807	28097	10.537	100	OK	24705	10.8035		BURSTSTART	2016-09-28 10:53:04	20222	29.9832	3431	1.10283	100	OK	24481	10.691
BURSTSTART	2016-09-28 10:55:04	20083	30.1857	28812	10.8097	100	OK	24703	10.8027		BURSTSTART	2016-09-28 10:58:04	20226	29.9765	3667	1.19286	100	OK	24484	10.6923
BURSTSTART	2016-09-28 11:00:04	20086	30.1807	30318	11.3842	100	OK	24704	10.8031		BURSTSTART	2016-09-28 11:03:04	20224	29.9798	3933	1.29433	100	OK	24483	10.6918
BURSTSTART	2016-09-28 11:05:04	20089	30.1756	31176	11.7115	100	OK	24705	10.8035		BURSTSTART	2016-09-28 11:08:04	20218	29.9899	3989	1.31569	100	OK	24481	10.691
BURSTSTART	2016-09-28 11:10:04	20079	30.1924	29450	11.0531	100	OK	24702	10.8023		BURSTSTART	2016-09-28 11:13:04	20219	29.9882	3808	1.24664	100	OK	24484	10.6923
BURSTSTART	2016-09-28 11:15:04	20082	30.1874	31079	11.6745	100	OK	24703	10.8027		BURSTSTART	2016-09-28 11:18:04	20218	29.9899	3982	1.31302	100	OK	24485	10.6927
BURSTSTART	2016-09-28 11:20:04	20079	30.1924	30812	11.5727	100	OK	24702	10.8023		BURSTSTART	2016-09-28 11:23:04	20207	30.0082	3742	1.22147	100	OK	24482	10.6914
BURSTSTART	2016-09-28 11:25:04	20079	30.1924	29261	10.981	100	OK	24704	10.8031		BURSTSTART	2016-09-28 11:28:04	20206	30.0099	3199	1.01433	100	OK	24483	10.6918
BURSTSTART	2016-09-28 11:30:04	20085	30.1823	32435	12.1918	100	OK	24704	10.8031		BURSTSTART	2016-09-28 11:33:04	20197	30.025	3873	1.27144	100	OK	24482	10.6914
BURSTSTART	2016-09-28 11:35:04	20078	30.1941	32816	12.3371	100	OK	24702	10.8023		BURSTSTART	2016-09-28 11:38:04	20196	30.0266	2868	0.888062	100	OK	24485	10.6927
BURSTSTART	2016-09-28 11:40:04	20074	30.2008	32579	12.2467	100	OK	24703	10.8027		BURSTSTART	2016-09-28 11:43:04	20193	30.0317	3840	1.25885	100	OK	24482	10.6914
BURSTSTART	2016-09-28 11:45:04	20079	30.1924	32053	12.0461	100	OK	24703	10.8027		BURSTSTART	2016-09-28 11:48:04	20185	30.0451	4507	1.51329	100	OK	24481	10.691
BURSTSTART	2016-09-28 11:50:04	20082	30.1874	34319	12.9105	100	OK	24703	10.8027		BURSTSTART	2016-09-28 11:53:04	20184	30.0467	4140	1.37329	100	OK	24481	10.691
BURSTSTART	2016-09-28 11:55:04	20084	30.184	33357	12.5435	100	OK	24703	10.8027		BURSTSTART	2016-09-28 11:58:04	20180	30.0534	4165	1.38283	100	OK	24482	10.6914
BURSTSTART	2016-09-28 12:00:04	20079	30.1924	34821	13.102	100	OK	24702	10.8023		BURSTSTART	2016-09-28 12:03:04	20181	30.0517	3753	1.22566	100	OK	24479	10.6902
BURSTSTART	2016-09-28 12:05:04	20082	30.1874	32640	12.27	100	OK	24701	10.8018		BURSTSTART	2016-09-28 12:08:04	20181	30.0517	4380	1.46484	100	OK	24481	10.691
BURSTSTART	2016-09-28 12:10:04	20091	30.1723	34764	13.0802	100	OK	24702	10.8023		BURSTSTART	2016-09-28 12:13:04	20185	30.0451	3647	1.18523	100	OK	24480	10.6906
BURSTSTART	2016-09-28 12:15:04	20088	30.1773	33884	12.7445	100	OK	24702	10.8023		BURSTSTART	2016-09-28 12:18:04	20184	30.0467	4321	1.44234	100	OK	24481	10.691
BURSTSTART	2016-09-28 12:20:04	20086	30.1807	34410	12.9452	100	OK	24703	10.8027		BURSTSTART	2016-09-28 12:23:04	20185	30.0451	5088	1.73493	100	OK	24480	10.6906
BURSTSTART	2016-09-28 12:25:04	20094	30.1672	35060	13.1931	100	OK	24700	10.8014		BURSTSTART	2016-09-28 12:28:04	20181	30.0517	4643	1.56517	100	OK	24481	10.691
BURSTSTART	2016-09-28 12:30:04	20088	30.1773	35726	13.4472	100	OK	24703	10.8027		BURSTSTART	2016-09-28 12:33:04	20176	30.0601	5009	1.70479	100	OK	24480	10.6906
BURSTSTART	2016-09-28 12:35:04	20090	30.1739	33132	12.4577	100	OK	24705	10.8035		BURSTSTART	2016-09-28 12:38:04	20167	30.0752	3714	1.21079	100	OK	24478	10.6897
BURSTSTART	2016-09-28 12:40:04	20081	30.1891	33148	12.4638	100	OK	24707	10.8044		BURSTSTART	2016-09-28 12:43:04	20176	30.0601	3704	1.20697	100	OK	24481	10.691
BURSTSTART	2016-09-28 12:45:04	20079	30.1924	36866	13.8821	100	OK	24703	10.8027		BURSTSTART	2016-09-28 12:48:04	20164	30.0802	4225	1.40572	100	OK	24479	10.6902
BURSTSTART	2016-09-28 12:50:04	20088	30.1773	34327	12.9135	100	OK	24701	10.8018		BURSTSTART	2016-09-28 12:53:04	20161	30.0852	3814	1.24893	100	OK	24484	10.6923
BURSTSTART	2016-09-28 12:55:04	20084	30.184	35719	13.4445	100	OK	24704	10.8031		BURSTSTART	2016-09-28 12:58:04	20153	30.0986	3765	1.23024	100	OK	24477	10.6893
BURSTSTART	2016-09-28 13:00:04	20089	30.1756	36279	13.6582	100	OK	24703	10.8027		BURSTSTART	2016-09-28 13:03:04	20132	30.1338	4682	1.58005	100	OK	24476	10.6889
BURSTSTART	2016-09-28 13:05:04	20086	30.1807	35606	13.4014	100	OK	24704	10.8031		BURSTSTART	2016-09-28 13:08:04	20108	30.1741	3870	1.27029	100	OK	24476	10.6889
BURSTSTART	2016-09-28 13:10:04	20087	30.179	35388	13.3183	100	OK	24703	10.8027		BURSTSTART	2016-09-28 13:13:04	20099	30.1892	4419	1.47972	100	OK	24474	10.6881
BURSTSTART	2016-09-28 13:15:04	20085	30.1823	36893	13.8924	100	OK	24704	10.8031		BURSTSTART	2016-09-28 13:18:04	20098	30.1909	5096	1.73798	100	OK	24474	10.6881
BURSTSTART	2016-09-28 13:20:04	20086	30.1807	38631	14.5554	100	OK	24703	10.8027		BURSTSTART	2016-09-28 13:23:04	20102	30.1842	3361	1.07613	100	OK	24474	10.6881
BURSTSTART	2016-09-28 13:25:04	20088	30.1773	38391	14.4638	100	OK	24703	10.8027		BURSTSTART	2016-09-28 13:28:04	20103	30.1825	3825	1.25313	100	OK	24476	10.6889
BURSTSTART	2016-09-28 13:30:04	20088	30.1773	40886	15.4156	100	OK	24704	10.8031		BURSTSTART	2016-09-28 13:33:04	20095	30.1959	4288	1.42975	100	OK	24475	10.6885
BURSTSTART	2016-09-28 13:35:04	20086	30.1807	40457	15.2519	100	OK	24704	10.8031		BURSTSTART	2016-09-28 13:38:04	20109	30.1724	4456	1.49384	100	OK	24479	10.6902
BURSTSTART	2016-09-28 13:40:04	20083	30.1857	42961	16.2071	100	OK	24704	10.8031		BURSTSTART	2016-09-28 13:43:04	20119	30.1556	4332	1.44653	100	OK	24483	10.6918
BURSTSTART	2016-09-28 13:45:04	20087	30.179	43029	16.2331	100	OK	24704	10.8031		BURSTSTART	2016-09-28 13:48:04	20113	30.1657	4293	1.43166	100	OK	24476	10.6889
BURSTSTART	2016-09-28 13:50:04	20086	30.1807	43702	16.4898	100	OK	24703	10.8027		BURSTSTART	2016-09-28 13:53:04	20103	30.1825	5251	1.7971	100	OK	24475	10.6885
BURSTSTART	2016-09-28 13:55:04	20085	30.1823	45009	16.9884	100	OK	24702	10.8023		BURSTSTART	2016-09-28 13:58:04	20101	30.1858	4138	1.37253	100	OK	24476	10.6889
BURSTSTART	2016-09-28 14:00:04	20092	30.1706	39919	15.0467	100	OK	24702	10.8023		BURSTSTART	2016-09-28 14:03:04	20109	30.1724	4072	1.34735	100	OK	24476	10.6889
BURSTSTART	2016-09-28 14:05:04	20088	30.1773	42063	15.8646	100	OK	24702	10.8023		BURSTSTART	2016-09-28 14:08:04	20110	30.1707	5643	1.94664	100	OK	24476	10.6889
BURSTSTART	2016-09-28 14:10:04	20091	30.1723	42186	15.9115	100	OK	24701	10.8018		BURSTSTART	2016-09-28 14:13:04	20112	30.1674	4087	1.35307	100	OK	24476	10.6889
BURSTSTART	2016-09-28 14:15:04	20088	30.1773	41242	15.5514	100	OK	24701	10.8018		BURSTSTART	2016-09-28 14:18:04	20107	30.1758	3142	0.992585	100	OK	24478	10.6897
BURSTSTART	2016-09-28 14:20:04	20089	30.1756	40133	15.1283	100	OK	24701	10.8018		BURSTSTART	2016-09-28 14:23:04	20098	30.1909	4371	1.46141	100	OK	24476	10.6889
BURSTSTART	2016-09-28 14:25:04	20089	30.1756	43500	16.4127	100	OK	24701	10.8018		BURSTSTART	2016-09-28 14:28:04	20086	30.211	3327	1.06316	100	OK	24477	10.6893
BURSTSTART	2016-09-28 14:30:04	20088	30.1773	42298	15.9542	100	OK	24702	10.8023		BURSTSTART	2016-09-28 14:33:04	20070	30.2379	3173	1.00441	100	OK	24475	10.6885
BURSTSTART	2016-09-28 14:35:04	20089	30.1756	44413	16.761	100	OK	24701	10.8018		BURSTSTART	2016-09-28 14:38:04	20056	30.2614	6536	2.28729	100	OK	21571	9.47312
BURSTSTART	2016-09-28 14:40:04	20083	30.1857	44060	16.6264	100	OK	24705	10.8035		BURSTSTART	2016-09-28 14:43:04	20046	30.2782	3684	1.19934	100	OK	24475	10.6885
BURSTSTART	2016-09-28 14:45:04	20086	30.1807	45532	17.1879	100	OK	24702	10.8023		BURSTSTART	2016-09-28 14:48:04	20039	30.29	3980	1.31226	100	OK	24477	10.6893
BURSTSTART	2016-09-28 14:50:04	20085	30.1823	44645	16.8495	100	OK	24704	10.8031		BURSTSTART	2016-09-28 14:53:04	20041	30.2866	4015	1.32561	100	OK	24474	10.6881
BURSTSTART	2016-09-28 14:55:04	20085	30.1823	44286	16.7126	100	OK	24705	10.8035		BURSTSTART	2016-09-28 14:58:04	20040	30.2883	4029	1.33095	100	OK	24475	10.6885
BURSTSTART	2016-09-28 15:00:04	20085	30.1823	45081	17.0159	100	OK	22865	10.0292		BURSTSTART	2016-09-28 15:03:04	20042	30.2849	6173	2.14882	100	OK	24477	10.6893
BURSTSTART	2016-09-28 15:05:04	20083	30.1857	43611	16.4551	100	OK	24704	10.8031		BURSTSTART	2016-09-28 15:08:04	20041	30.2866	3029	0.949479	100	OK	24476	10.6889
BURSTSTART	2016-09-28 15:10:04	20093	30.1689	47769	18.0412	100	OK	24704	10.8031		BURSTSTART	2016-09-28 15:13:04	20045	30.2799	3633	1.17989	100	OK	24474	10.6881
BURSTSTART	2016-09-28 15:15:04	20087	30.179	49198	18.5864	100	OK	24702	10.8023		BURSTSTART	2016-09-28 15:18:04	20042	30.2849	3086	0.971223	100	OK	24476	10.6889
BURSTSTART	2016-09-28 15:20:04	20084	30.184	46208	17.4458	100	OK	24703	10.8027		BURSTSTART	2016-09-28 15:23:04	20048	30.2749	3153	0.996781	100	OK	24476	10.6889
BURSTSTART	2016-09-28 15:25:04	20086	30.1807	43512	16.4173	100	OK	24705	10.8035		BURSTSTART	2016-09-28 15:28:04	20046	30.2782	4703	1.58806	100	OK	24475	10.6885
BURSTSTART	2016-09-28 15:30:04	20081	30.1891	49145	18.5661	100	OK	24703	10.8027		BURSTSTART	2016-09-28 15:33:04	20045	30.2799	4831	1.63689	100	OK	24476	10.6889
BURSTSTART	2016-09-28 15:35:04	20083	30.1857	48547	18.338	100	OK	24702	10.8023		BURSTSTART	2016-09-28 15:38:04	20048	30.2749	4038	1.33438	100	OK	24476	10.6889
BURSTSTART	2016-09-28 15:40:04	20086	30.1807	49656	18.7611	100	OK	24702	10.8023		BURSTSTART	2016-09-28 15:43:04	20054	30.2648	3895	1.27983	100	OK	24475	10.6885
BURSTSTART	2016-09-28 15:45:04	20087	30.179	51477	19.4557	100	OK	24703	10.8027		BURSTSTART	2016-09-28 15:48:04	20057	30.2597	4962	1.68686	100	OK	24477	10.6893
BURSTSTART	2016-09-28 15:50:04	20087	30.179	53104	20.0764	100	OK	24703	10.8027		BURSTSTART	2016-09-28 15:53:04	20059	30.2564	5275	1.80626	100	OK	24476	10.6889
BURSTSTART	2016-09-28 15:55:04	20090	30.1739	48235	18.219	100	OK	24702	10.8023		BURSTSTART	2016-09-28 15:58:04	20064	30.248	3900	1.28174	100	OK	24477	10.6893
BURSTSTART	2016-09-28 16:00:04	20091	30.1723	52675	19.9127	100	OK	24701	10.8018		BURSTSTART	2016-09-28 16:03:04	20069	30.2396	4316	1.44043	100	OK	24477	10.6893
BURSTSTART	2016-09-28 16:05:04	20090	30.1739	52457	19.8296	100	OK	24703	10.8027		BURSTSTART	2016-09-28 16:08:04	20074	30.2312	4054	1.34049	100	OK	24477	10.6893
BURSTSTART	2016-09-28 16:10:04	20092	30.1706	54229	20.5055	100	OK	24703	10.8027		BURSTSTART	2016-09-28 16:13:04	20077	30.2261	4134	1.371	100	OK	24478	10.6897
BURSTSTART	2016-09-28 16:15:04	20090	30.1739	55342	20.9301	100	OK	24701	10.8018		BURSTSTART	2016-09-28 16:18:04	20079	30.2228	3762	1.2291	100	OK	24476	10.6889
BURSTSTART	2016-09-28 16:20:04	20093	30.1689	54282	20.5258	100	OK	24701	10.8018		BURSTSTART	2016-09-28 16:23:04	20083	30.216	5393	1.85127	100	OK	24481	10.691
BURSTSTART	2016-09-28 16:25:04	20089	30.1756	54689	20.681	100	OK	24702	10.8023		BURSTSTART	2016-09-28 16:28:04	20085	30.2127	3969	1.30806	100	OK	24477	10.6893
BURSTSTART	2016-09-28 16:30:04	20086	30.1807	59426	22.488	100	OK	24704	10.8031		BURSTSTART	2016-09-28 16:33:04	20094	30.1976	3950	1.30081	100	OK	24476	10.6889
BURSTSTART	2016-09-28 16:35:04	20086	30.1807	12557	23.0179	20	OK	24694	10.7989		BURSTSTART	2016-09-28 16:38:04	20095	30.1959	4092	1.35498	100	OK	24476	10.6889
BURSTSTART	2016-09-28 16:40:04	20086	30.1807	12373	22.6669	20	OK	24696	10.7997		BURSTSTART	2016-09-28 16:43:04	20099	30.1892	4615	1.55449	100	OK	24478	10.6897
BURSTSTART	2016-09-28 16:45:04	20086	30.1807	12202	22.3408	20	OK	24696	10.7997		BURSTSTART	2016-09-28 16:48:04	20103	30.1825	4136	1.37177	100	OK	24482	10.6914
BURSTSTART	2016-09-28 16:50:04	20089	30.1756	12932	23.7332	20	OK	24695	10.7993		BURSTSTART	2016-09-28 16:53:04	20103	30.1825	5277	1.80702	100	OK	24476	10.6889
BURSTSTART	2016-09-28 16:55:04	20091	30.1723	12250	22.4323	20	OK	24696	10.7997		BURSTSTART	2016-09-28 16:58:04	20103	30.1825	4982	1.69449	100	OK	24477	10.6893
BURSTSTART	2016-09-28 17:00:04	20090	30.1739	12574	23.0503	20	OK	24695	10.7993		BURSTSTART	2016-09-28 17:03:04	20105	30.1791	3564	1.15356	100	OK	24475	10.6885
BURSTSTART	2016-09-28 17:05:04	20093	30.1689	13215	24.2729	20	OK	24695	10.7993		BURSTSTART	2016-09-28 17:08:04	20104	30.1808	4040	1.33515	100	OK	24476	10.6889
BURSTSTART	2016-09-28 17:10:04	20094	30.1672	12755	23.3956	20	OK	24694	10.7989		BURSTSTART	2016-09-28 17:13:04	20104	30.1808	4079	1.35002	100	OK	24477	10.6893
BURSTSTART	2016-09-28 17:15:04	20095	30.1655	12501	22.9111	20	OK	24695	10.7993		BURSTSTART	2016-09-28 17:18:04	20107	30.1758	4962	1.68686	100	OK	24475	10.6885
BURSTSTART	2016-09-28 17:20:04	20094	30.1672	14258	26.2623	20	OK	24695	10.7993		BURSTSTART	2016-09-28 17:23:04	20108	30.1741	4374	1.46256	100	OK	24475	10.6885
BURSTSTART	2016-09-28 17:25:04	20093	30.1689	14757	27.2141	20	OK	24694	10.7989		BURSTSTART	2016-09-28 17:28:04	20108	30.1741	4041	1.33553	100	OK	24476	10.6889
BURSTSTART	2016-09-28 17:30:04	20093	30.1689	14256	26.2585	20	OK	24693	10.7985		BURSTSTART	2016-09-28 17:33:04	20103	30.1825	5230	1.78909	100	OK	24476	10.6889
BURSTSTART	2016-09-28 17:35:04	20089	30.1756	14923	27.5307	20	OK	24694	10.7989		BURSTSTART	2016-09-28 17:38:04	20098	30.1909	7684	2.72522	100	OK	24475	10.6885
BURSTSTART	2016-09-28 17:40:04	20085	30.1823	14883	27.4544	20	OK	24695	10.7993		BURSTSTART	2016-09-28 17:43:04	20091	30.2026	3896	1.28021	100	OK	24476	10.6889
BURSTSTART	2016-09-28 17:45:04	20084	30.184	14323	26.3863	20	OK	24696	10.7997		BURSTSTART	2016-09-28 17:48:04	20087	30.2093	3847	1.26152	100	OK	24475	10.6885
BURSTSTART	2016-09-28 17:50:04	20080	30.1907	14442	26.6133	20	OK	24696	10.7997		BURSTSTART	2016-09-28 17:53:04	20078	30.2244	5959	2.06719	100	OK	24475	10.6885
BURSTSTART	2016-09-28 17:55:04	20080	30.1907	15339	28.3241	20	OK	24694	10.7989		BURSTSTART	2016-09-28 17:58:04	20072	30.2345	4187	1.39122	100	OK	24473	10.6877
BURSTSTART	2016-09-28 18:00:04	20079	30.1924	15724	29.0585	20	OK	24695	10.7993		BURSTSTART	2016-09-28 18:03:04	20075	30.2295	4216	1.40228	100	OK	24475	10.6885
BURSTSTART	2016-09-28 18:05:04	20080	30.1907	15321	28.2898	20	OK	24695	10.7993		BURSTSTART	2016-09-28 18:08:04	20076	30.2278	4695	1.58501	100	OK	24475	10.6885
BURSTSTART	2016-09-28 18:10:04	20079	30.1924	15355	28.3547	20	OK	24695	10.7993		BURSTSTART	2016-09-28 18:13:04	20085	30.2127	3199	1.01433	100	OK	24476	10.6889
BURSTSTART	2016-09-28 18:15:04	20082	30.1874	16501	30.5405	20	OK	24695	10.7993		BURSTSTART	2016-09-28 18:18:04	20086	30.211	3469	1.11733	100	OK	24477	10.6893
BURSTSTART	2016-09-28 18:20:04	20088	30.1773	16190	29.9473	20	OK	24695	10.7993		BURSTSTART	2016-09-28 18:23:04	20085	30.2127	3584	1.16119	100	OK	24476	10.6889
BURSTSTART	2016-09-28 18:25:04	20097	30.1622	15585	28.7934	20	OK	24694	10.7989		BURSTSTART	2016-09-28 18:28:04	20088	30.2077	3869	1.26991	100	OK	24475	10.6885
BURSTSTART	2016-09-28 18:30:04	20100	30.1571	15381	28.4043	20	OK	24692	10.7981		BURSTSTART	2016-09-28 18:33:04	20093	30.1993	4360	1.45721	100	OK	24476	10.6889
BURSTSTART	2016-09-28 18:35:04	20099	30.1588	16346	30.2448	20	OK	24693	10.7985		BURSTSTART	2016-09-28 18:38:04	20096	30.1942	4255	1.41716	100	OK	24475	10.6885
BURSTSTART	2016-09-28 18:40:04	20102	30.1538	16204	29.974	20	OK	24692	10.7981		BURSTSTART	2016-09-28 18:43:04	20101	30.1858	3953	1.30196	100	OK	24477	10.6893
BURSTSTART	2016-09-28 18:45:04	20102	30.1538	19012	35.3298	20	OK	24693	10.7985		BURSTSTART	2016-09-28 18:48:04	20104	30.1808	3153	0.996781	100	OK	24481	10.691
BURSTSTART	2016-09-28 18:50:04	20100	30.1571	17560	32.5604	20	OK	24692	10.7981		BURSTSTART	2016-09-28 18:53:04	20104	30.1808	4090	1.35422	100	OK	24480	10.6906
BURSTSTART	2016-09-28 18:55:04	20102	30.1538	17077	31.6391	20	OK	24691	10.7976		BURSTSTART	2016-09-28 18:58:04	20104	30.1808	4064	1.3443	100	OK	24476	10.6889
BURSTSTART	2016-09-28 19:00:04	20103	30.1521	19392	36.0546	20	OK	24693	10.7985		BURSTSTART	2016-09-28 19:03:04	20102	30.1842	6715	2.35558	100	OK	24477	10.6893
BURSTSTART	2016-09-28 19:05:04	20098	30.1605	19919	37.0598	20	OK	24695	10.7993		BURSTSTART	2016-09-28 19:08:04	20108	30.1741	4144	1.37482	100	OK	24386	10.6512
BURSTSTART	2016-09-28 19:10:04	20097	30.1622	21648	40.3576	20	OK	24695	10.7993		BURSTSTART	2016-09-28 19:13:04	20107	30.1758	8099	2.88353	100	OK	24479	10.6902
BURSTSTART	2016-09-28 19:15:04	20097	30.1622	20129	37.4604	20	OK	24695	10.7993		BURSTSTART	2016-09-28 19:18:04	20110	30.1707	3705	1.20735	100	OK	24477	10.6893
BURSTSTART	2016-09-28 19:20:04	20098	30.1605	19586	36.4247	20	OK	24695	10.7993		BURSTSTART	2016-09-28 19:23:04	20113	30.1657	4087	1.35307	100	OK	24480	10.6906
BURSTSTART	2016-09-28 19:25:04	20092	30.1706	21507	40.0887	20	OK	24694	10.7989		BURSTSTART	2016-09-28 19:28:04	20113	30.1657	5056	1.72272	100	OK	24478	10.6897
BURSTSTART	2016-09-28 19:30:04	20094	30.1672	19263	35.8086	20	OK	24661	10.785		BURSTSTART	2016-09-28 19:33:04	20114	30.164	4154	1.37863	100	OK	24476	10.6889
BURSTSTART	2016-09-28 19:35:04	20091	30.1723	20844	38.8241	20	OK	24693	10.7985		BURSTSTART	2016-09-28 19:38:04	20118	30.1573	4936	1.67694	100	OK	24477	10.6893
BURSTSTART	2016-09-28 19:40:04	20094	30.1672	23718	44.3058	20	OK	24694	10.7989		BURSTSTART	2016-09-28 19:43:04	20118	30.1573	3919	1.28899	100	OK	24476	10.6889
BURSTSTART	2016-09-28 19:45:04	20091	30.1723	23750	44.3669	20	OK	24694	10.7989		BURSTSTART	2016-09-28 19:48:04	20121	30.1523	4389	1.46828	100	OK	24477	10.6893
BURSTSTART	2016-09-28 19:50:04	20097	30.1622	20499	38.1661	20	OK	24693	10.7985		BURSTSTART	2016-09-28 19:53:04	20127	30.1422	5119	1.74675	100	OK	24477	10.6893
BURSTSTART	2016-09-28 19:55:04	20099	30.1588	25044	46.835	20	OK	24691	10.7976		BURSTSTART	2016-09-28 19:58:04	20126	30.1439	3798	1.24283	100	OK	24479	10.6902
BURSTSTART	2016-09-28 20:00:04	20102	30.1538	21161	39.4287	20	OK	24692	10.7981		BURSTSTART	2016-09-28 20:03:04	20128	30.1405	5402	1.85471	100	OK	24477	10.6893
BURSTSTART	2016-09-28 20:05:04	20104	30.1504	25548	47.7963	20	OK	24692	10.7981		BURSTSTART	2016-09-28 20:08:04	20131	30.1355	5522	1.90048	100	OK	24478	10.6897
BURSTSTART	2016-09-28 20:10:04	20103	30.1521	23321	43.5486	20	OK	24693	10.7985		BURSTSTART	2016-09-28 20:13:04	20131	30.1355	4402	1.47324	100	OK	24481	10.691
BURSTSTART	2016-09-28 20:15:04	20105	30.1487	23507	43.9034	20	OK	24692	10.7981		BURSTSTART	2016-09-28 20:18:04	20131	30.1355	4494	1.50833	100	OK	24476	10.6889
BURSTSTART	2016-09-28 20:20:04	20107	30.1454	25023	46.7949	20	OK	24692	10.7981		BURSTSTART	2016-09-28 20:23:04	20132	30.1338	4716	1.59302	100	OK	24478	10.6897
BURSTSTART	2016-09-28 20:25:04	20107	30.1454	22961	42.862	20	OK	24693	10.7985		BURSTSTART	2016-09-28 20:28:04	20133	30.1322	3204	1.01624	100	OK	24479	10.6902
BURSTSTART	2016-09-28 20:30:04	20107	30.1454	23853	44.5633	20	OK	24693	10.7985		BURSTSTART	2016-09-28 20:33:04	20134	30.1305	4932	1.67542	100	OK	24478	10.6897
BURSTSTART	2016-09-28 20:35:04	20108	30.1437	21691	40.4396	20	OK	24693	10.7985		BURSTSTART	2016-09-28 20:38:04	20134	30.1305	18713	6.93245	100	OK	24477	10.6893
BURSTSTART	2016-09-28 20:40:04	20106	30.147	26073	48.7976	20	OK	24691	10.7976		BURSTSTART	2016-09-28 20:43:04	20137	30.1254	4977	1.69258	100	OK	24479	10.6902
BURSTSTART	2016-09-28 20:45:04	20107	30.1454	26441	49.4995	20	OK	24692	10.7981		BURSTSTART	2016-09-28 20:48:04	20136	30.1271	4576	1.53961	100	OK	24478	10.6897
BURSTSTART	2016-09-28 20:50:04	20107	30.1454	23293	43.4952	20	OK	24692	10.7981		BURSTSTART	2016-09-28 20:53:04	20141	30.1187	4006	1.32218	100	OK	24478	10.6897
BURSTSTART	2016-09-28 20:55:04	20107	30.1454	27311	51.1589	20	OK	24691	10.7976		BURSTSTART	2016-09-28 20:58:04	20141	30.1187	4017	1.32637	100	OK	24479	10.6902
BURSTSTART	2016-09-28 21:00:04	20106	30.147	29185	54.7333	20	OK	24691	10.7976		BURSTSTART	2016-09-28 21:03:04	20141	30.1187	3745	1.22261	100	OK	24479	10.6902
BURSTSTART	2016-09-28 21:05:04	20104	30.1504	23596	44.0731	20	OK	24693	10.7985		BURSTSTART	2016-09-28 21:08:04	20143	30.1154	4160	1.38092	100	OK	24480	10.6906
BURSTSTART	2016-09-28 21:10:04	20108	30.1437	28521	53.4668	20	OK	24691	10.7976		BURSTSTART	2016-09-28 21:13:04	20143	30.1154	4201	1.39656	100	OK	24481	10.691
BURSTSTART	2016-09-28 21:15:04	20108	30.1437	25536	47.7734	20	OK	24690	10.7972		BURSTSTART	2016-09-28 21:18:04	20140	30.1204	4574	1.53885	100	OK	24479	10.6902
BURSTSTART	2016-09-28 21:20:04	20109	30.142	23485	43.8614	20	OK	24692	10.7981		BURSTSTART	2016-09-28 21:23:04	20138	30.1238	4382	1.46561	100	OK	24481	10.691
BURSTSTART	2016-09-28 21:25:04	20105	30.1487	13607	25.0206	20	OK	24692	10.7981		BURSTSTART	2016-09-28 21:28:04	20134	30.1305	4377	1.4637	100	OK	24481	10.691
BURSTSTART	2016-09-28 21:30:04	20104	30.1504	16278	30.1151	20	OK	24692	10.7981		BURSTSTART	2016-09-28 21:33:04	20133	30.1322	4450	1.49155	100	OK	24478	10.6897
BURSTSTART	2016-09-28 21:35:04	20106	30.147	14453	26.6342	20	OK	24693	10.7985		BURSTSTART	2016-09-28 21:38:04	20133	30.1322	5062	1.72501	100	OK	24483	10.6918
BURSTSTART	2016-09-28 21:40:04	20103	30.1521	13782	25.3544	20	OK	24690	10.7972		BURSTSTART	2016-09-28 21:43:04	20130	30.1372	4844	1.64185	100	OK	24477	10.6893
BURSTSTART	2016-09-28 21:45:04	20104	30.1504	15125	27.916	20	OK	24694	10.7989		BURSTSTART	2016-09-28 21:48:04	20130	30.1372	4043	1.33629	100	OK	24479	10.6902
BURSTSTART	2016-09-28 21:50:04	20106	30.147	14367	26.4702	20	OK	24694	10.7989		BURSTSTART	2016-09-28 21:53:04	20128	30.1405	6969	2.45247	100	OK	24475	10.6885
BURSTSTART	2016-09-28 21:55:04	20105	30.1487	14626	26.9642	20	OK	24692	10.7981		BURSTSTART	2016-09-28 21:58:04	20128	30.1405	5503	1.89324	100	OK	24477	10.6893
BURSTSTART	2016-09-28 22:00:04	20106	30.147	14195	26.1421	20	OK	24691	10.7976		BURSTSTART	2016-09-28 22:03:04	20129	30.1389	3411	1.0952	100	OK	24480	10.6906
BURSTSTART	2016-09-28 22:05:04	20102	30.1538	17434	32.32	20	OK	24691	10.7976		BURSTSTART	2016-09-28 22:08:04	20130	30.1372	5470	1.88065	100	OK	24478	10.6897
BURSTSTART	2016-09-28 22:10:04	20102	30.1538	14080	25.9228	20	OK	24689	10.7968		BURSTSTART	2016-09-28 22:13:04	20129	30.1389	4907	1.66588	100	OK	24477	10.6893
BURSTSTART	2016-09-28 22:15:04	20102	30.1538	16798	31.107	20	OK	24692	10.7981		BURSTSTART	2016-09-28 22:18:04	20130	30.1372	7075	2.49291	100	OK	24479	10.6902
BURSTSTART	2016-09-28 22:20:04	20103	30.1521	14232	26.2127	20	OK	24691	10.7976		BURSTSTART	2016-09-28 22:23:04	20130	30.1372	3779	1.23558	100	OK	24480	10.6906
BURSTSTART	2016-09-28 22:25:04	20102	30.1538	14477	26.68	20	OK	24693	10.7985		BURSTSTART	2016-09-28 22:28:04	20129	30.1389	5057	1.7231	100	OK	24479	10.6902
BURSTSTART	2016-09-28 22:30:04	20104	30.1504	17354	32.1675	20	OK	24692	10.7981		BURSTSTART	2016-09-28 22:33:04	20129	30.1389	5258	1.79977	100	OK	24479	10.6902
[truncated: 445 more rows]

## Sheet: Temperature
Date and time	Eves Garden	Anenome Garden
09/28/16 07:00:00 PM	30.356	30.457
09/28/16 09:00:00 PM	30.255	30.457
[truncated: 2,777 more rows]
