# Supplementary material for: Borneo coral reefs subject to high sediment loads show evidence of resilience to various environmental stressors
Source: PeerJ. 2019 Aug 14;7:e7382. doi: 10.7717/peerj.7382 (PMC6698134; doi:10.7717/peerj.7382)
Supplement: Supplemental Information 13 [file peerj-07-7382-s013.xlsx]

## Sheet: Benthic cover
Site	Transect	Anemones	Hard Coral	Soft Corals	Algae	Sponges	Unidentified	Dead Coral	Abiotic	Acropora (ACR)	Alveopora (ALV)	Astreopora (ASTR)	Caulastrea (CAUL)	Coscinaraea (COSCI)	Ctenactis (CTEN)	Cyphastrea (CYPH)	Diploastrea (DIPL)	Echinophyllia (EPHYL)	Echinopora (EPOR)	Euphyllia (EUPH)	Favia (FV)	Favites (FVT)	Fungia (FUN)	Galaxea (GAL)	Gardinoseris (GARD)	Goniastrea (GONIA)	Goniopora (GONIO)	Heliofungia (HELIO)	Herpolitha (HERP)	Hydnophora (HYDN)	Leptastrea (LEPSTR)	Leptoria (LEPTOR)	Leptoseris (LEPT)	Lobophyllia (LOBO)	Merulina (MER)	Montastrea (MONTA)	Montipora (MONT)	Moseleya (MOS)	Mycedium (MYC)	Oulophyllia (OUL)	Oxypora (OXYP)	Pachyseris (PACH)	Pavona (PAV)	Pectinia (PECT)	Physogyra (PHYS)	Platygyra (PLAT)	Plerogyra (PLER)	Pocillopora (POCIL)	Podabacia (POD)
AG	T1	0	18.9551	2.35766	62.5724	1.05	1.33933	6.1953	11.2209	0	0	0	0.454545	0	0	0	6.4	0	0	0	1.78103	0	0	0.869565	0	0	0	0	0	0	0	0	0	0	0	0	0	0	0	0	0	0	0	0	0	7.75	0	0	0
AG	T2	0	40.0263	0	45.4098	0.2	0.644664	6.51103	13.292	0	0	0	0	0	0	0	26.409	0	0.227273	0	3.88317	4.02955	0	0	0	0	0	0	0	0	0	0	0	0	0	0	0	0	0	0	0	0	0	0	0	0	0	0	0
AG	T3	0.4	36.2405	0	45.6284	0.2	2.33162	3.9748	14.9995	0	0	0.852174	0	0	0.881818	0	20.8	0	0	0	3.34078	2.2	0	0.608333	0	0	0	0	0	0	0	0	0	0	0	0	0.881818	0	0	0	0	0	0	0	0	0	0	0	0
AG	T4	1.46051	20.3016	2.16977	67.2171	0.855487	0.501253	6.61247	3.44643	0	0	0	0.6	0	0	0	0	0	0	0	0.884524	1.65476	0	0.408333	0	0	0	0	0	0	0	0	0	0	0	0	5.95254	0	0	0	0	2.06316	0	0	0	0.2	0	0	0
AG	T5	1.45833	25.8177	3.43333	58.4807	0.208333	0.416667	5.26892	6.18245	0	0	0	0	0	0	0	2.06739	0	0	0	2.11537	2.13244	0	0.638095	0	0.238095	0	0	0	0	0	0	0	0	0	0	2.225	0	0	0	0	1	0	0	0	0.808333	0	0	0
AG	T6	0.421053	13.3175	43.5113	36.472	0	0	3.92397	3.22082	0	0	0	0	0	0	0	0	0	0	0	0.860412	3.66029	0	0	0	0.210526	0	0	0	0	0	0	0	0	0.210526	0	1.30064	0	0	0	0	0	0	0	0	0.219298	0	0	0
EG	T1	0	9.1234	9.84101	47.4284	0	0.227273	5.40067	26.4719	0	0	0	0	0	0	0	2.86957	0	0	0	0.238095	0.714286	0	2.68406	0	0	0	0	0	0	0	0	0	0	0	0	0.217391	0	0	0	0	0	0	0	0	0	0	0	0
EG	T2	0.666667	36.3858	12.4038	41.7728	0.907407	0.453704	2.00426	2.88889	0	0	0	0	0	0.462963	0	12.8201	2.26852	0	0	0.231481	1.55556	0	4.44444	0	0	0	0	0	0	0	0	0	0	1.20773	0	3.13043	0	0	0	0	8.26455	0	0	0	0.888889	0	0	0
EG	T3	0	27.0671	4.70703	58.4345	0.638095	2	2.2592	0.8	0	0	0	0	0	0	0	1.4	0	0	0	1.6	4.1631	0	9.87976	0	0	0	0.608333	0	0	0	0	0	0	0	0	1.00833	0	0	0	0.208333	5.19924	0	0	0	0.4	0	0	0
EG	T4	0	4.21054	22.0763	49.733	0.425725	0.208333	4.1469	21.0772	0	0	0	0	0	0	0	0	0	0	0	0.416667	0.909091	0	0	0	0	0	0	0	0	0	0	0	0	0	0	0	0	0	0	0	0	0	0	0	0	0	0	0
EG	T5	0.208333	22.2031	31.4758	37.9103	0.816667	1.01667	3.63472	6.3692	0	0	0	0	0	0	0	0	0	0	0	1.28788	0.208333	0	0	0	0	0	0	0	0	0	0	1.08696	0	0.625	0	0	0	0	0.208333	0	0	0	0	0	0	0	0	0
EG	T6	0	24.9172	17.2508	54.3344	0.434783	0.8	2.59305	1.05455	0.2	0	0	0	0	0	0	0	0	0	0	2.05145	2.00833	0	0	0	0	0	0	0	0	0	0.2	0	0	8.16051	0	3.00833	0	0	0	0	0	0	0	0	4.01739	0	0	0
Siwa	T1	0.397516	52.3619	0.207039	36.9789	0.380952	1.54831	3.45312	5.33333	3.24569	0	2.89027	0	0	0	0	0	0	2.66667	0	11.0476	5.67598	0	2.47619	0	0	0	0	0	0	0	0	7.2381	0	1.90476	0	7.3708	0	0	0	0	0	0	0	0	0.190476	0	0	0
Siwa	T2	1.0352	40.2922	0	50.1809	0	1.19186	5.03292	3.16149	4.33126	0	0	0	0	0	0	0	0	7.95411	0	0.380952	1.36508	0	0.604555	0	0	0	0	0	0	0	0	0	0	5.20635	0	3.76329	0	0	0	0	0	0	0	0	0	0	0	0
Siwa	T3	0	25.2106	0.579365	64.6747	0	1.21542	2.36728	3.42857	4.19048	0	1.0352	0	0	0	0	0	0	2.31815	0	4.17983	2.09524	0	1.5735	0	0	0	0	0	0	0	0	0	0	0	0	2.28571	0	0	0	0	0	0	0	0	0	0	0	0
Siwa	T4	0.833333	42.8947	0	51.8616	0.408333	2.12013	4.17043	1.48182	0.217391	0	0	0	0	0.643116	0	0	0	2.3237	0	0.4	4.54431	0.2	0	0	0.208333	0	0	0	0	0	0	0.2	0	0.6	0	18.5156	0	0	0	1.00833	8.92391	0	0	1.03333	1.51515	0.616667	0	0
Siwa	T5	0	23.9116	0.814059	62.8357	0.388889	1.15873	4.34906	10.4935	0	0	1.44928	0	0	0	0	0	0	0.198413	0	2.18461	6.56423	0.190476	0	0	1.16736	0	0	0	0	0	0	0	0.226757	1.78571	0	5.15424	0	0	0	0	0.388889	0	0.198413	0	0.207039	0	0	0
Siwa	T6	0	30.0742	4.05577	55.0833	0.189394	2.0808	4.61842	8.12049	0.727273	0.181818	0	0	0	0.181818	0	0.790514	0	0	0	3.5247	8.40137	0	0	0	0.181818	0	0	0	0	0	0	0.909091	0	1.16173	0	4.84777	0	0	0	0	1.29752	0	0	0	2.08663	0	0	0
[truncated: 20 more columns]

## Sheet: Coral health site
Percentage of all corals per transect in 2016 and 2017 at the 3 reef sites
Year	Site	Transect	Whole BL	Partial BL	Focal BL	Non Focal	Scars	Pigmentation	Trematodiasis	Bioerosion	Disease	Mucus	Healthy
2016	AG	1	0	1.6129	1.6129	1.6129	0	6.45161	0	8.06452	4.83871	1.6129	74.1935
2016	AG	2	0	2.73973	1.36986	1.36986	0	4.10959	0	4.10959	0	0	86.3014
2016	AG	3	0	1.6129	1.6129	1.6129	0	6.45161	0	8.06452	4.83871	1.6129	74.1935
2016	AG	4	0	1.5625	0	1.5625	0	10.9375	0	4.6875	0	0	81.25
2016	AG	5	0	9.52381	0	3.1746	0	14.2857	0	1.5873	0	1.5873	69.8413
2016	AG	6	0	2.17391	0	0	0	13.0435	0	2.17391	0	0	82.6087
2016	EG	1	0	0	0	1.66667	6.66667	6.66667	0	5	0	3.33333	76.6667
2016	EG	2	2.08333	2.08333	0	2.08333	0	2.08333	0	0	0	0	91.6667
2016	EG	3	0	0	0	0	0	0	0	0	0	0	100
2016	EG	4	2.08333	6.25	8.33333	10.4167	0	8.33333	0	0	0	8.33333	56.25
2016	EG	5	0	7.40741	3.7037	3.7037	7.40741	24.0741	0	1.85185	1.85185	9.25926	40.7407
2016	EG	6	1.42857	7.14286	1.42857	0	0	15.7143	0	4.28571	1.42857	11.4286	57.1429
2016	Siwa	1	0	6.84932	0	0	1.36986	1.36986	0	0	0	0	90.411
2016	Siwa	2	1.1236	2.24719	0	1.1236	0	0	0	2.24719	0	0	93.2584
2016	Siwa	3	0	5.76923	0	1.92308	0	1.92308	0	6.73077	0.961538	0.961538	81.7308
2016	Siwa	1	0	13.4146	0	1.21951	4.87805	3.65854	0	0	1.21951	0	75.6098
2016	Siwa	2	0	5.55556	0	2.77778	2.77778	0	0	2.77778	0	0	86.1111
2016	Siwa	3	0	4.25532	0	2.12766	0	6.38298	0	0	0	0	87.234
2017	AG	1	0	0	4.9505	0	1.9802	8.91089	0	7.92079	0	1.9802	74.2574
2017	AG	2	0	0	2.17391	0	4.34783	5.43478	0	4.34783	0	8.69565	75
2017	AG	3	0	1.23457	2.46914	4.93827	2.46914	7.40741	0	0	0	3.7037	77.7778
2017	EG	1	0	1	2	1	0	4	0	15	3	1	73
2017	EG	2	0	0	0	0.980392	0	0	0	4.90196	4.90196	0	89.2157
2017	EG	3	0	1.83486	0	0	0	0.917431	0	7.33945	1.83486	0.917431	87.156
2017	EG	4	3.1746	3.1746	1.5873	1.5873	0	3.1746	0	17.4603	0	1.5873	68.254
2017	EG	5	0	2.17391	4.34783	0	2.17391	4.34783	0	15.2174	0	0	71.7391
2017	EG	6	0	1.0101	0	0	1.0101	3.0303	0	8.08081	0	1.0101	85.8586
2017	Siwa	1	0	5.35714	0	0.892857	0	0	0	11.6071	3.57143	0	78.5714
2017	Siwa	2	0	2.85714	0	0.714286	2.14286	1.42857	0	16.4286	1.42857	0	75
2017	Siwa	3	0	1.83486	0	0	0.917431	0	0	9.17431	0.917431	0	88.0734
2017	Siwa	1	2.38095	1.19048	4.7619	1.19048	1.19048	5.95238	0	9.52381	0	2.38095	71.4286
2017	Siwa	2	0	2.85714	0	1.42857	0	4.28571	0	0	8.57143	0	82.8571
2017	Siwa	3	0	4.44444	1.11111	1.11111	0	1.11111	0	21.1111	0	2.22222	68.8889

## Sheet: Bleaching recovery
Location	Genus	Size of colony	Bleached (cm2)	Bleaching scale (2016)	Bleaching scale (2017)	Recovery
EG	Diploastrea	>1 m2	0-20%	3	1	1
EG	Diploastrea	0.2 to 0.5 m2	20-50%	4	1	1
EG	Diploastrea	0.2 to 0.5 m2	20-50%	4	1	1
EG	Diploastrea	0.5 to 1 m2	50-80%	5	1	1
EG	Pachyseris	0.2 to 0.5 m2	50-80%	5	1	1
EG	Pachyseris	0.5 to 1 m2	20-50%	4	2	0.9
Siwa	Pachyseris	0.2 to 0.5 m2	Pale	2	1	1
Siwa	Pachyseris	0.2 to 0.5 m2	0-20%	3	1	1
Siwa	Pachyseris	0.2 to 0.5 m2	Pale	2	1	1
Siwa	Pachyseris	0.5 to 1 m2	80-100%	6	1	1
EG	Porites	>1 m2	50-80%	5	3	0.9
EG	Porites	0.2 to 0.5 m2	0-20%	3	3	0
EG	Porites	0.2 to 0.5 m2	0-20%	3	3	0
EG	Porites	0.5 to 1 m2	80-100%	6	2	0.9

## Sheet: Chlorophyll a
Site	Genus	µg/cm2
Anemones	Acropora	5.52895
Anemones	Acropora	3.26202
Anemones	Acropora	3.37041
Anemones	Acropora	6.58622
Anemones	Acropora	3.16017
Anemones	Acropora	3.70156
Anemones	Acropora	2.33227
Anemones	Acropora	3.57366
Anemones	Montipora	2.36983
Anemones	Montipora	1.96474
Anemones	Montipora	3.74959
Anemones	Montipora	3.32267
Anemones	Montipora	2.67633
Anemones	Pachyseris	2.11863
Anemones	Pachyseris	5.71621
Anemones	Pachyseris	2.53466
Anemones	Pachyseris	1.70844
EG	Montipora	7.03079
EG	Montipora	3.24974
EG	Montipora	8.93439
EG	Montipora	5.25562
EG	Montipora	2.92445
EG	Montipora	5.05374
EG	Pachyseris	1.93343
EG	Pachyseris	6.88061
EG	Pachyseris	2.83904
EG	Pachyseris	1.78886
EG	Pachyseris	1.14177
Siwa	Acropora	7.24312
Siwa	Acropora	5.53078
Siwa	Acropora	0.224004
Siwa	Acropora	7.33127
Siwa	Acropora	2.22834
Siwa	Acropora	5.93084
Siwa	Acropora	6.53428
Siwa	Acropora	6.73768
Siwa	Acropora	4.5147
Siwa	Montipora	4.105
Siwa	Montipora	1.16271
Siwa	Montipora	1.10147
Siwa	Montipora	9.18329
Siwa	Pachyseris	1.19876
Siwa	Pachyseris	5.81874
Siwa	Pachyseris	11.3873
Siwa	Pachyseris	3.89624

## Sheet: Symbiont counts
Site	Coral species	Average count	Number per ml	Density per 40 ml	Total slurry vol (cm3)	Density per fragment	SA (cm2)	Density per cm2
Anenome	Acropora	60	600000	2400000	306	18360000	5.38	3.41264e+06
Anenome	Acropora	80.8	808000	3232000	368	29734400	6.16	4.82701e+06
Anenome	Acropora	124.8	1248000	4992000	261	32572800	5.71	5.70452e+06
Anenome	Acropora	37.6	376000	1504000	170	6392000	5.5	1.16218e+06
Anenome	Acropora	102.2	1022000	4088000	171	17476200	5.81	3.00795e+06
Anenome	Acropora	74.4	744000	2976000	186	13838400	5.73	2.41508e+06
Anenome	Acropora	103.2	1032000	4128000	265	27348000	7.54	3.62706e+06
Anenome	Acropora	85.4	854000	3416000	237	20239800	5.4	3.74811e+06
Anenome	Montipora	20	200000	800000	345	6900000	4.99	1.38277e+06
Anenome	Montipora	33.8	338000	1352000	275	9295000	9.78	950409
Anenome	Montipora	56.2	562000	2248000	168	9441600	8.18	1.15423e+06
Anenome	Montipora	9.2	92000	368000	387	3560400	7.83	454713
Anenome	Montipora	7.6	76000	304000	355	2698000	10.09	267393
Anenome	Pachyseris	18.2	182000	728000	297	5405400	9.57	564828
Anenome	Pachyseris	47.8	478000	1912000	318	15200400	8.27	1.83802e+06
Anenome	Pachyseris	17	170000	680000	308	5236000	6.29	832432
Anenome	Pachyseris	21.8	218000	872000	360	7848000	11.37	690237
EG	Montipora	159.6	1596000	6384000	274	43730400	10.48	4.17275e+06
EG	Montipora	62	620000	2480000	320	19840000	7.47	2.65596e+06
EG	Montipora	55.8	558000	2232000	185	10323000	6.81	1.51586e+06
EG	Montipora	49.2	492000	1968000	280	13776000	7.95	1.73283e+06
EG	Montipora	26.8	268000	1072000	250	6700000	7.04	951705
EG	Montipora	17.2	172000	688000	187	3216400	6.64	484398
EG	Pachyseris	31.6	316000	1264000	290	9164000	6.99	1.31102e+06
EG	Pachyseris	60.8	608000	2432000	180	10944000	5.12	2137500
EG	Pachyseris	20.6	206000	824000	355	7313000	10.66	686023
EG	Pachyseris	25.6	256000	1024000	405	10368000	8.77	1.18221e+06
EG	Pachyseris	10.2	102000	408000	385	3927000	6.16	637500
Siwa	Acropora	96	960000	3840000	200	19200000	5.69	3.37434e+06
Siwa	Acropora	88.8	888000	3552000	460	40848000	5.3	7.70717e+06
Siwa	Acropora	52.8	528000	2112000	289	15259200	5.69	2.68176e+06
Siwa	Acropora	70.8	708000	2832000	248	17558400	5.7	3.08042e+06
Siwa	Acropora	36.2	362000	1448000	325	11765000	7.01	1.67832e+06
Siwa	Acropora	114.8	1148000	4592000	180	20664000	4.74	4.35949e+06
Siwa	Acropora	140.4	1404000	5616000	347	48718800	5.15	9.45996e+06
Siwa	Acropora	88.4	884000	3536000	312	27580800	5.28	5.22364e+06
Siwa	Acropora	111.2	1112000	4448000	304	33804800	5.43	6.22556e+06
Siwa	Acropora	83.2	832000	3328000	192	15974400	6.06	2.63604e+06
Siwa	Montipora	19	190000	760000	168	3192000	6.12	521569
Siwa	Montipora	19	190000	760000	340	6460000	10.16	635827
Siwa	Montipora	52.4	524000	2096000	417	21850800	8.72	2.50583e+06
Siwa	Montipora	19.6	196000	784000	311	6095600	5.77	1.05643e+06
Siwa	Pachyseris	24.8	248000	992000	425	10540000	6.42	1.64174e+06
Siwa	Pachyseris	12.6	126000	504000	250	3150000	6.98	451289
Siwa	Pachyseris	203.2	2032000	8128000	80	16256000	6.1	2.66492e+06
Siwa	Pachyseris	30.6	306000	1224000	484	14810400	5.6	2.64471e+06
Siwa	Pachyseris	56.8	568000	2272000	278	15790400	5.84	2.70384e+06

## Sheet: Cell degradation
Sample nr	coral genus	grade	Density per cm2	Sum of cells	Pentage (%)
Anemone 6	Acropora	1	3.40212e+06		72.0506
Anemone 6	Acropora	2	435809		9.22962
Anemone 6	Acropora	3	91379.3		1.93524
Anemone 6	Acropora	4	61505.3		1.30257
Anemone 6	Acropora	5	731034	4.72185e+06	15.482
Anemones 1	Acropora	1	5.4394e+06		80.0808
Anemones 1	Acropora	2	694781		10.2288
Anemones 1	Acropora	3	102846		1.51413
Anemones 1	Acropora	4	79991.2		1.17766
Anemones 1	Acropora	5	475377	6.7924e+06	6.99865
Anemones 10	Montipora	1	743472		60.0664
Anemones 10	Montipora	2	45183.4		3.65044
Anemones 10	Montipora	3	27383.9		2.21239
Anemones 10	Montipora	4	27383.9		2.21239
Anemones 10	Montipora	5	394328	1.23775e+06	31.8584
Anemones 11	Pachyseris	1	477931		64.2559
Anemones 11	Pachyseris	2	51724.1		6.9541
Anemones 11	Pachyseris	3	31034.5		4.17246
Anemones 11	Pachyseris	4	46551.7		6.25869
Anemones 11	Pachyseris	5	136552	743793	18.3588
Anemones 12	Pachyseris	1	1.14588e+06		56.015
Anemones 12	Pachyseris	2	269166		13.1579
Anemones 12	Pachyseris	3	102539		5.01253
Anemones 12	Pachyseris	4	128174		6.26566
Anemones 12	Pachyseris	5	399903	2.04566e+06	19.5489
Anemones 16	Montipora	1	276782		34.1463
Anemones 16	Montipora	2	49425.3		6.09756
Anemones 16	Montipora	3	0		0
Anemones 16	Montipora	4	148276		18.2927
Anemones 16	Montipora	5	336092	810575	41.4634
Anemones 17	Pachyseris	1	538633		47.2103
Anemones 17	Pachyseris	2	156693		13.7339
Anemones 17	Pachyseris	3	73449.9		6.43777
Anemones 17	Pachyseris	4	0		0
Anemones 17	Pachyseris	5	372146	1.14092e+06	32.618
Anemones 18	Pachyseris	1	417942		50.8997
Anemones 18	Pachyseris	2	105541		12.8535
Anemones 18	Pachyseris	3	47493.4		5.78406
Anemones 18	Pachyseris	4	47493.4		5.78406
Anemones 18	Pachyseris	5	202639	821108	24.6787
Anemones 19	Montipora	1	401002		30.6338
Anemones 19	Montipora	2	248898		19.0141
Anemones 19	Montipora	3	92184.4		7.04225
Anemones 19	Montipora	4	428657		32.7465
Anemones 19	Montipora	5	138277	1.30902e+06	10.5634
Anemones 2	Acropora	1	2.52535e+06		77.3295
Anemones 2	Acropora	2	213290		6.5312
Anemones 2	Acropora	3	56877.3		1.74165
Anemones 2	Acropora	4	94795.5		2.90276
Anemones 2	Acropora	5	375390	3.26571e+06	11.4949
Anemones 20	Montipora	1	472393		55.9068
Anemones 20	Montipora	2	28118.6		3.32779
Anemones 20	Montipora	3	49207.6		5.82363
Anemones 20	Montipora	4	49207.6		5.82363
Anemones 20	Montipora	5	246038	844964	29.1181
Anemones 3	Acropora	1	1.19309e+06		73.1061
Anemones 3	Acropora	2	216364		13.2576
Anemones 3	Acropora	3	30909.1		1.89394
Anemones 3	Acropora	4	0		0
Anemones 3	Acropora	5	191636	1632000	11.7424
Anemones 4	Acropora	1	2.63711e+06		75
Anemones 4	Acropora	2	294320		8.37054
Anemones 4	Acropora	3	76523.2		2.17634
Anemones 4	Acropora	4	137349		3.90625
Anemones 4	Acropora	5	370843	3.51614e+06	10.5469
Anemones 5	Acropora	1	1.85675e+06		77.7702
Anemones 5	Acropora	2	175288		7.34194
Anemones 5	Acropora	3	56806.3		2.37933
Anemones 5	Acropora	4	32460.7		1.35962
Anemones 5	Acropora	5	266178	2.38749e+06	11.1489
Anemones 7	Acropora	1	3.15122e+06		70.5651
Anemones 7	Acropora	2	754889		16.9042
Anemones 7	Acropora	3	87777.8		1.9656
Anemones 7	Acropora	4	76805.6		1.7199
Anemones 7	Acropora	5	395000	4.46569e+06	8.84521
Anemones 8	Montipora	1	4.05039e+06		70.332
Anemones 8	Montipora	2	669091		11.6183
Anemones 8	Montipora	3	155325		2.6971
Anemones 8	Montipora	4	95584.4		1.65975
Anemones 8	Montipora	5	788571	5.75896e+06	13.6929
Anemones 9	Acropora	1	0		0
Anemones 9	Acropora	2	0		0
Anemones 9	Acropora	3	0		0
Anemones 9	Acropora	4	35183.3		21.0526
Anemones 9	Acropora	5	131938	167121	78.9474
EG 1	Montipora	1	3.04328e+06		86.9305
EG 1	Montipora	2	339885		9.70874
EG 1	Montipora	3	52290.1		1.49365
EG 1	Montipora	4	65362.6		1.86706
EG 1	Montipora	5	0	3.50082e+06	0
EG 15	Montipora	1	0		0
EG 15	Montipora	2	0		0
EG 15	Montipora	3	0		0
EG 15	Montipora	4	0		0
EG 15	Montipora	5	0	0	0
EG 16	Pachyseris	1	788269		56.9715
EG 16	Pachyseris	2	248927		17.991
EG 16	Pachyseris	3	62231.8		4.49775
EG 16	Pachyseris	4	107868		7.7961
EG 16	Pachyseris	5	176323	1.38362e+06	12.7436
EG 17	Pachyseris	1	0		0
EG 17	Pachyseris	2	0		0
EG 17	Pachyseris	3	0		0
EG 17	Pachyseris	4	0		0
EG 17	Pachyseris	5	0	0	0
EG 18	Pachyseris	1	339681		32.2785
EG 18	Pachyseris	2	66604.1		6.32911
EG 18	Pachyseris	3	0		0
EG 18	Pachyseris	4	79925		7.59494
EG 18	Pachyseris	5	566135	1.05235e+06	53.7975
EG 19	Pachyseris	1	914367		66.8919
EG 19	Pachyseris	2	157013		11.4865
EG 19	Pachyseris	3	46180.2		3.37838
EG 19	Pachyseris	4	249373		18.2432
EG 19	Pachyseris	5	0	1.36693e+06	0
EG 2	Montipora	1	880176		75.3488
EG 2	Montipora	2	27165.9		2.32558
EG 2	Montipora	3	0		0
EG 2	Montipora	4	27165.9		2.32558
EG 2	Montipora	5	233627	1.16814e+06	20
EG 20	Montipora	1	957987		73.1183
EG 20	Montipora	2	35220.1		2.68817
EG 20	Montipora	3	46960.2		3.58423
EG 20	Montipora	4	35220.1		2.68817
EG 20	Montipora	5	234801	1.31019e+06	17.9211
EG 3	Montipora	1	292892		43.6669
EG 3	Montipora	2	84488		12.5962
EG 3	Montipora	3	46937.8		6.9979
EG 3	Montipora	4	49284.6		7.3478
EG 3	Montipora	5	197139	670740	29.3912
EG 4	Pachyseris	1	487500		60.9375
EG 4	Pachyseris	2	171875		21.4844
EG 4	Pachyseris	3	62500		7.8125
EG 4	Pachyseris	4	0		0
EG 4	Pachyseris	5	78125	800000	9.76562
EG 5	Montipora	1	774148		67.7019
EG 5	Montipora	2	35511.4		3.10559
EG 5	Montipora	3	71022.7		6.21118
EG 5	Montipora	4	35511.4		3.10559
EG 5	Montipora	5	227273	1.14347e+06	19.8758
Siwa 1	Acropora	1	3.55009e+06		78.0928
Siwa 1	Acropora	2	281195		6.18557
Siwa 1	Acropora	3	168717		3.71134
Siwa 1	Acropora	4	46865.8		1.03093
Siwa 1	Acropora	5	499121	4.54599e+06	10.9794
Siwa 1.1	Acropora	1	834112		62.3762
Siwa 1.1	Acropora	2	66199.4		4.9505
Siwa 1.1	Acropora	3	66199.4		4.9505
Siwa 1.1	Acropora	4	66199.4		4.9505
Siwa 1.1	Acropora	5	304517	1.33723e+06	22.7723
Siwa 1.2	Pachyseris	1	458453		58.7156
Siwa 1.2	Pachyseris	2	107450		13.7615
Siwa 1.2	Pachyseris	3	35816.6		4.58716
Siwa 1.2	Pachyseris	4	71633.2		9.17431
Siwa 1.2	Pachyseris	5	107450	780802	13.7615
Siwa 1.3	Montipora	1	0		0
Siwa 1.3	Montipora	2	0		0
Siwa 1.3	Montipora	3	0		0
Siwa 1.3	Montipora	4	0		0
Siwa 1.3	Montipora	5	0	0	0
Siwa 1.5	Acropora	1	2240000		76.2046
Siwa 1.5	Acropora	2	230820		7.85247
Siwa 1.5	Acropora	3	39344.3		1.33849
Siwa 1.5	Acropora	4	43715.8		1.48721
Siwa 1.5	Acropora	5	385574	2.93945e+06	13.1172
Siwa 14	Montipora	1	327953		53.8462
Siwa 14	Montipora	2	0		0
Siwa 14	Montipora	3	0		0
Siwa 14	Montipora	4	66929.1		10.989
Siwa 14	Montipora	5	214173	609055	35.1648
Siwa 16	Acropora	1	5.19019e+06		65.9559
Siwa 16	Acropora	2	1.28453e+06		16.3235
Siwa 16	Acropora	3	144654		1.83824
Siwa 16	Acropora	4	173585		2.20588
Siwa 16	Acropora	5	1.07623e+06	7.86918e+06	13.6765
Siwa 17	Acropora	1	2.06211e+06		66.5574
Siwa 17	Acropora	2	670439		21.6393
Siwa 17	Acropora	3	152373		4.91803
Siwa 17	Acropora	4	50790.9		1.63934
Siwa 17	Acropora	5	162531	3.09824e+06	5.2459
Siwa 18	Pachyseris	1	1.03714e+06		48
Siwa 18	Pachyseris	2	259286		12
Siwa 18	Pachyseris	3	0		0
Siwa 18	Pachyseris	4	86428.6		4
Siwa 18	Pachyseris	5	777857	2.16071e+06	36
Siwa 19	Montipora	1	439954		38.1215
Siwa 19	Montipora	2	63761.5		5.52486
Siwa 19	Montipora	3	0		0
Siwa 19	Montipora	4	172156		14.9171
Siwa 19	Montipora	5	478211	1.15408e+06	41.4365
Siwa 2	Acropora	1	2.08842e+06		66.482
Siwa 2	Acropora	2	443789		14.1274
Siwa 2	Acropora	3	43508.8		1.38504
Siwa 2	Acropora	4	478596		15.2355
Siwa 2	Acropora	5	87017.5	3.14133e+06	2.77008
Siwa 21	Acropora	1	917974		69.1099
Siwa 21	Acropora	2	150678		11.3438
Siwa 21	Acropora	3	0		0
Siwa 21	Acropora	4	92724.7		6.9808
Siwa 21	Acropora	5	166904	1.32828e+06	12.5654
Siwa 22	Acropora	1	3.61519e+06		65.2353
Siwa 22	Acropora	2	1.09367e+06		19.735
Siwa 22	Acropora	3	126582		2.28415
Siwa 22	Acropora	4	706329		12.7455
Siwa 22	Acropora	5	0	5.54177e+06	0
Siwa 23	Acropora	1	9.78338e+06		83.2887
Siwa 23	Acropora	2	1.07806e+06		9.17782
Siwa 23	Acropora	3	107806		0.917782
Siwa 23	Acropora	4	89838.2		0.764818
Siwa 23	Acropora	5	687262	1.17463e+07	5.85086
Siwa 24	Montipora	1	819272		69.2483
Siwa 24	Montipora	2	53899.5		4.55581
Siwa 24	Montipora	3	53899.5		4.55581
Siwa 24	Montipora	4	0		0
Siwa 24	Montipora	5	256023	1.18309e+06	21.6401
Siwa 25	Pachyseris	1	971096		73.1183
Siwa 25	Pachyseris	2	166610		12.5448
Siwa 25	Pachyseris	3	47602.7		3.58423
Siwa 25	Pachyseris	4	47602.7		3.58423
Siwa 25	Pachyseris	5	95205.5	1.32812e+06	7.16846
Siwa 3	Acropora	1	3.61636e+06		81.1671
Siwa 3	Acropora	2	295455		6.6313
Siwa 3	Acropora	3	0		0
Siwa 3	Acropora	4	118182		2.65252
Siwa 3	Acropora	5	425455	4.45545e+06	9.54907
Siwa 4	Acropora	1	5.00508e+06		80.8318
Siwa 4	Acropora	2	727808		11.7541
Siwa 4	Acropora	3	149294		2.41109
Siwa 4	Acropora	4	74647		1.20555
Siwa 4	Acropora	5	235138	6.19197e+06	3.79747
Siwa 5	Acropora	1	1.46535e+06		79.1275
Siwa 5	Acropora	2	133069		7.18563
Siwa 5	Acropora	3	63366.3		3.42173
Siwa 5	Acropora	4	190099		10.2652
Siwa 5	Acropora	5	0	1.85188e+06	0
